# Supplementary material for: Large-scale multi-omics unveils host-microbiome interactions driving root development and nitrogen acquisition
Source: Research Square preprint supplement (doi:10.21203/rs.3.rs-6521565/v1), 2025-05-05
Supplement: Supplementary file 1 [file aff868a26901358edfd1bc0e.xlsx]

## Sheet: Suppl Dataset 1
Supplemental Dataset 1. List of 300 rapeseed accessions sowed at two field locations. KF, Kaifeng; YL, Yangling. In total 175 accessions highlighted were successfully harvested for downstream multi-omics analyses at both locations.
Accession ID	Name	Origin	Vernalization type
R5030	Zheshuang-72-2	China	semi-winter
R5032	Zheshuang-758-2	China	semi-winter
R5033	Huyouqing	China	semi-winter
R5036	Yu106	China	semi-winter
R5038	Xiang2w019	China	semi-winter
R5039	E077	China	semi-winter
R5040	Luojing-1	China	semi-winter
R5041	Hu791	China	semi-winter
R5042	HuR4190	China	semi-winter
R5043	78251	China	semi-winter
R5044	Hu135	China	semi-winter
R5048	Fuyou-4	China	semi-winter
R5051	Xiangyang85-16	China	semi-winter
R5057	ZAAS-M5	China	semi-winter
R5058	ZAAS-M6	China	semi-winter
R5059	ZAAS-M7	China	semi-winter
R5064	ZAAS-M27	China	semi-winter
R5067	ZAAS-M39	China	semi-winter
R5073	ZAAS-M61	China	semi-winter
R5087	ZAAS-MS-26	China	semi-winter
R5088	ZAAS-MS-31	China	semi-winter
R5091	Xiang5708-A2	China	semi-winter
R5094	Luojing-2	China	semi-winter
R5103	Fuyou-2-2	China	semi-winter
R5110	ZY036	China	semi-winter
R5112	Zheshuang-72-1	China	semi-winter
R5124	ZAAS-MS-51	China	semi-winter
R5128	ZAAS-MS-84-620	China	semi-winter
R5129	ZAAS-MS-88	China	semi-winter
R5130	ZAAS-MS-96	China	semi-winter
R5131	ZAAS-M34	China	semi-winter
R5132	8424016	China	semi-winter
R5142	Zheshuang-8	China	semi-winter
R5145	U1-5	China	semi-winter
R5149	Ningyou-7 (CHN)	China	semi-winter
R5152	Q45	China	semi-winter
R5153	Rr1-3	China	semi-winter
R5155	2137changguizhong	China	semi-winter
R5156	Huyou15	China	semi-winter
R5158	N3-1	China	semi-winter
R5159	Niujiaoyoucai	China	semi-winter
R5161	CH33-6	China	semi-winter
R4718	Marasaki	Japan	semi-winter
R4720	Gogatsuna	Japan	semi-winter
R4725	Azuma (light Yellow)	Japan	semi-winter
R4728	Suigenshu	Korea, Democratic People's Republic of	semi-winter
R4731	Daichousen (murayama)	Korea, Democratic People's Republic of	semi-winter
R4894	Daichousen (fuku)	Korea, Democratic People's Republic of	semi-winter
R4999	Islamsbad	Pakistan	semi-winter
R5000	Takht Nusrati	Pakistan	semi-winter
R5006	Tank	Pakistan	semi-winter
R5012	Mianwali	Pakistan	semi-winter
R5017	Narowal-D1	Pakistan	semi-winter
R5018	Okara-D2	Pakistan	semi-winter
R5025	Wazir abad	Pakistan	semi-winter
R4227	Marnoo	Australia	spring
R4229	Wesbrook	Australia	spring
R4236	Tribute	Canada	spring
R4239	Golden	Canada	spring
R4247	Altex, Stamm 73 G 438	Canada	spring
R4252	Westar	Canada	spring
R5045	Chuan-205	China	spring
R5047	Meijian-1	China	spring
R5049	Fuyou-2-1	China	spring
R5120	CR 2237	China	spring
R5138	Qingza-3	China	spring
R4258	CR 2532	Cuba	spring
R4897	Ceska	Czech Republic	spring
R4168	Valecovska	Czechoslovakia	spring
R4260	Line	Denmark	spring
R4281	Brutor	France	spring
R4302	Tantal	France	spring
R4311	Toro	France	spring
R4316	Orpal, Crop	France	spring
R4634	Masora	German Democratic Republic	spring
R4353	Petranova, Lihonova	Germany	spring
R4365	Jumbo	Germany	spring
R4405	Uranus	Germany	spring
R4413	Maliras	Germany	spring
R4422	CR 3255	Germany	spring
R4434	Leopard	Germany	spring
R4440	Lisonne	Germany	spring
R4455	CR 3034	Germany	spring
R4508	Liraspa	Germany	spring
R4580	CRP 40.02	Germany	spring
R5111	Jisen1311	Germany	spring
R4695	CR2736	Italy	spring
R4696	Leonessa	Italy	spring
R4698	Cima rapa	Italy	spring
R4987	Rajanpur	Pakistan	spring
R4996	Marda	Pakistan	spring
R5002	Okara-B9	Pakistan	spring
R5003	Dara	Pakistan	spring
R5005	Rawalpindi-B12	Pakistan	spring
R5008	Haripur	Pakistan	spring
R5009	Nowshera-C4	Pakistan	spring
R5014	Nowshera-C9	Pakistan	spring
R5015	Laki	Pakistan	spring
R5019	Rawalpindi-D4	Pakistan	spring
R5022	Risalpur	Pakistan	spring
R5027	Khairabad	Pakistan	spring
R5029	CR 3248	Pakistan	spring
R4775	Bronowski	Poland	spring
R4798	Erake	Poland	spring
R4906	Ww 1273	Sweden	spring
R4907	Ww 1286	Sweden	spring
R4938	Granit	Sweden	spring
R4942	Conny	Sweden	spring
R4945	Niklas (svaloef)	Sweden	spring
R4955	Gulliver	Sweden	spring
R4210	Nosovskij 9	Union of Soviet Socialist Republics	spring
R4219	CR 1883	Union of Soviet Socialist Republics	spring
R4878	Fido	United Kingdom	spring
R4234	Annick	Belgium	winter
R4245	Bridger	Canada	winter
R5137	DWKL	China	winter
R5148	Ganyouza-3	China	winter
R4157	Sl 502	Czechoslovakia	winter
R4158	Sl 509	Czechoslovakia	winter
R4163	Op 08, Sonata	Czechoslovakia	winter
R4171	Sl G 2	Czechoslovakia	winter
R4176	Sl 17	Czechoslovakia	winter
R4177	Sl 25	Czechoslovakia	winter
R4179	Sl 512	Czechoslovakia	winter
R4180	Sl 524	Czechoslovakia	winter
R4181	Slapska, Slapy	Czechoslovakia	winter
R4182	Trebicska	Czechoslovakia	winter
R4187	Prerovska	Czechoslovakia	winter
R4191	Danska	Czechoslovakia	winter
R4194	Op 3/2	Czechoslovakia	winter
R4199	Op 01	Czechoslovakia	winter
R4202	Sl 29	Czechoslovakia	winter
R4268	BRA 1677	Denmark	winter
R4272	Ld 9431	Denmark	winter
R4275	BRA 930	Estonia	winter
R4283	Tonus	France	winter
R4284	R 77	France	winter
R4295	Kentan, R 68 A	France	winter
R4298	Ramses	France	winter
R4310	Jade	France	winter
R4314	Janus	France	winter
R4596	Bnw 1.103/88	German Democratic Republic	winter
R4601	Bnw 40	German Democratic Republic	winter
R4618	SR 403	German Democratic Republic	winter
R4627	Bnw 1.59/82	German Democratic Republic	winter
R4628	Bnw 1.61/83	German Democratic Republic	winter
R4635	Me 6	German Democratic Republic	winter
R4637	Bnw 1.62/83	German Democratic Republic	winter
R4638	Bnw 1.101/88	German Democratic Republic	winter
R4640	Bnw 1.63/83	German Democratic Republic	winter
R4641	Bnw 10	German Democratic Republic	winter
R4646	Malfura	German Democratic Republic	winter
R4647	Po 3	German Democratic Republic	winter
R4654	Gülzower Stamm 262/65	German Democratic Republic	winter
R4655	St. 118/69	German Democratic Republic	winter
R4664	SR 405	German Democratic Republic	winter
R4665	SR 410	German Democratic Republic	winter
R4667	Bnw 24	German Democratic Republic	winter
R4678	SR 414	German Democratic Republic	winter
R4680	Bnw 59 /82	German Democratic Republic	winter
R4324	Bk 27/78	Germany	winter
R4325	Erra	Germany	winter
R4330	CR 3258	Germany	winter
R4341	CR 3168	Germany	winter
R4342	Wrg 19 - R	Germany	winter
R4345	Libritta	Germany	winter
R4349	Astor	Germany	winter
R4350	Askari	Germany	winter
R4360	Semu 59/82	Germany	winter
R4368	Liraglu	Germany	winter
R4373	Esb - Kgr - 1	Germany	winter
R4374	Binera	Germany	winter
R4376	Liberty	Germany	winter
R4385	Eragi	Germany	winter
R4386	Bnw 36	Germany	winter
R4398	Liporta, Wrg 35	Germany	winter
R4406	Planet	Germany	winter
R4415	Ledos	Germany	winter
R4420	Sabine	Germany	winter
R4431	Esb - Fgr - 1	Germany	winter
R4437	Luna	Germany	winter
R4439	Nubi	Germany	winter
R4441	Rosko	Germany	winter
R4450	Orion (GER)	Germany	winter
R4451	Liglory	Germany	winter
R4452	Npz 51	Germany	winter
R4453	Nubi 2276	Germany	winter
R4463	Korina	Germany	winter
R4464	Diamant	Germany	winter
R4465	Nevin	Germany	winter
R4469	Niklot	Germany	winter
R4472	Prince	Germany	winter
R4473	Echo	Germany	winter
R4474	Furax	Germany	winter
R4480	Bk 28/78	Germany	winter
R4482	Tamara	Germany	winter
R4484	Arabella	Germany	winter
R4487	Giessener Höhenraps	Germany	winter
R4489	Kurander	Germany	winter
R4500	Belinda	Germany	winter
R4502	St. Si 7450/76, Norli	Germany	winter
R4507	Billinda	Germany	winter
R4510	Olymp	Germany	winter
R4514	Lirakus, Wrg 34	Germany	winter
R4518	Bk 11	Germany	winter
R4523	Libravo, Wrg 43	Germany	winter
R4525	Perle, Ha 3804	Germany	winter
R4531	Atlas	Germany	winter
R4533	Rasant	Germany	winter
R4543	Gesunder	Germany	winter
R4547	Metol	Germany	winter
R4558	Orle	Germany	winter
R4572	Sonnengold	Germany	winter
R4576	Nurator	Germany	winter
R4583	Licondor	Germany	winter
R4592	BRA 3100	Germany	winter
R4593	BRA 2927	Germany	winter
R4586	Brauner	Germany (before 1945)	winter
R4684	Fertödi Törzskönyvezett	Hungary	winter
R4689	Ir 5	Hungary	winter
R4690	Sobotka Utantermés	Hungary	winter
R4697	Sinapri	Italy	winter
R4707	Hokkai 3-go	Japan	winter
R4713	Michinoku Natane	Japan	winter
R4716	New Hakuran	Japan	winter
R4722	Murusaki Natane	Japan	winter
R4723	CR 3172	Japan	winter
R4734	CR 771	Lithuania	winter
R4737	CR 3197	Morocco	winter
R4743	Velox	Netherlands	winter
R4747	Mansholts Hamburger Raps	Netherlands	winter
R4748	Marana	Netherlands	winter
R4749	Ramon	Netherlands	winter
R4755	Bishop (NED)	Netherlands	winter
R4756	Anton	Netherlands	winter
R4757	Baraska	Netherlands	winter
R4758	Viva	Netherlands	winter
R4762	Winfred	Netherlands	winter
R4763	Mara	Netherlands	winter
R4766	Aphid Resistant Rape	New Zealand	winter
R4767	Giant Rape	New Zealand	winter
R4773	1002	Poland	winter
R4776	Opt 341/87	Poland	winter
R4779	Pn 3/89	Poland	winter
R4783	Start	Poland	winter
R4784	Mah 2	Poland	winter
R4786	Boh 1	Poland	winter
R4792	Janek	Poland	winter
R4794	Beryl, Jg 75	Poland	winter
R4795	188/73	Poland	winter
R4796	Boh 987	Poland	winter
R4797	Boh 384	Poland	winter
R4801	Mah 181	Poland	winter
R4804	Skrzeszowicka, Fero	Poland	winter
R4810	Mah 232	Poland	winter
R4812	Mah 1, Jantar	Poland	winter
R4815	Gorczanski	Poland	winter
R4817	Boh 887	Poland	winter
R4822	Bravo Nova	Poland	winter
R4825	Slonski	Poland	winter
R4835	Pob 182	Poland	winter
R4839	Nusi	Poland	winter
R4843	Boh 1187	Poland	winter
R4845	Janpol	Poland	winter
R4849	CR 3129	Poland	winter
R4855	Pol1684	Poland	winter
R4859	BRA 1679	Romania	winter
R4861	CR 851	Russian Federation	winter
R4862	Siberian	Russian Federation	winter
R4900	BRA 1680	Sweden	winter
R4904	Ww 1101	Sweden	winter
R4905	Ww 1105	Sweden	winter
R4910	WW 572	Sweden	winter
R4914	Ww 827	Sweden	winter
R4917	Ww 873	Sweden	winter
R4920	Ww 917	Sweden	winter
R4921	Ww 920	Sweden	winter
R4924	Ww 950	Sweden	winter
R4944	Brink	Sweden	winter
R4950	Fora	Sweden	winter
R4959	Herkules	Sweden	winter
R4971	Orion (Sweden)	Sweden	winter
R4973	Rustan	Sweden	winter
R4977	Sipal	Sweden	winter
R4978	Status, Sv 74-19	Sweden	winter
R4983	Sv 742819	Sweden	winter
R4868	Vinnickij Mestnyj	Ukraine	winter
R4870	Muitnizkij	Ukraine	winter
R4213	CR 894	Union of Soviet Socialist Republics	winter
R4215	Kiewskij 18	Union of Soviet Socialist Republics	winter
R4218	Mitnickij 2	Union of Soviet Socialist Republics	winter
R4220	Kiewskij 216	Union of Soviet Socialist Republics	winter
R4222	Nemertschanskij 1	Union of Soviet Socialist Republics	winter
R4873	Gazelle	United Kingdom	winter
R4875	Dwarf Essex	United Kingdom	winter
R4877	Rape Kale	United Kingdom	winter
R4879	Hungry Gap	United Kingdom	winter
R4880	Leader	United Kingdom	winter
R4887	Bishop (UK)	United Kingdom	winter
R4888	Essex Broad Leaved	United Kingdom	winter

## Sheet: Suppl Dataset 2
Supplemental Dataset 2. Identification of gene coexpression modules by WGCNA.
geneID	moduleName
BnaC09g05970D	bisque4
BnaC09g06000D	bisque4
BnaC09g06110D	bisque4
BnaC09g06120D	bisque4
BnaC09g06200D	bisque4
BnaC09g06280D	bisque4
BnaC09g06290D	bisque4
BnaC09g06310D	bisque4
BnaC09g06350D	bisque4
BnaC09g06370D	bisque4
BnaC09g06600D	bisque4
BnaC09g06720D	bisque4
BnaC09g06730D	bisque4
BnaC09g06780D	bisque4
BnaC09g06840D	bisque4
BnaC09g06850D	bisque4
BnaC09g06920D	bisque4
BnaC09g06980D	bisque4
BnaC09g06990D	bisque4
BnaC09g07050D	bisque4
BnaC09g07160D	bisque4
BnaC09g07230D	bisque4
BnaC09g07350D	bisque4
BnaC09g07370D	bisque4
BnaC09g07550D	bisque4
BnaC09g07660D	bisque4
BnaC09g07800D	bisque4
BnaC09g07820D	bisque4
BnaC09g07830D	bisque4
BnaC09g07890D	bisque4
BnaC09g07900D	bisque4
BnaC09g50970D	bisque4
BnaC09g50980D	bisque4
BnaCnng15810D	bisque4
BnaCnng15830D	bisque4
BnaCnng57860D	bisque4
BnaA01g00390D	black
BnaA01g01330D	black
BnaA01g01400D	black
BnaA01g01650D	black
BnaA01g01800D	black
BnaA01g01980D	black
BnaA01g03340D	black
BnaA01g03680D	black
BnaA01g04000D	black
BnaA01g04030D	black
BnaA01g04150D	black
BnaA01g04480D	black
BnaA01g04770D	black
BnaA01g05060D	black
BnaA01g05080D	black
BnaA01g05110D	black
BnaA01g05280D	black
BnaA01g05320D	black
BnaA01g05370D	black
BnaA01g05660D	black
BnaA01g06130D	black
BnaA01g06180D	black
BnaA01g06670D	black
BnaA01g06810D	black
BnaA01g07170D	black
BnaA01g07830D	black
BnaA01g08620D	black
BnaA01g08900D	black
BnaA01g08950D	black
BnaA01g09860D	black
BnaA01g10270D	black
BnaA01g11060D	black
BnaA01g11400D	black
BnaA01g13540D	black
BnaA01g13800D	black
BnaA01g14040D	black
BnaA01g14050D	black
BnaA01g14470D	black
BnaA01g15250D	black
BnaA01g16060D	black
BnaA01g16780D	black
BnaA01g17150D	black
BnaA01g17750D	black
BnaA01g18270D	black
BnaA01g19040D	black
BnaA01g19120D	black
BnaA01g19790D	black
BnaA01g20340D	black
BnaA01g20520D	black
BnaA01g21560D	black
BnaA01g22200D	black
BnaA01g22220D	black
BnaA01g22230D	black
BnaA01g23480D	black
BnaA01g23550D	black
BnaA01g24160D	black
BnaA01g24310D	black
BnaA01g24760D	black
BnaA01g25320D	black
BnaA01g25730D	black
BnaA01g26050D	black
BnaA01g26200D	black
BnaA01g26950D	black
BnaA01g27170D	black
BnaA01g27470D	black
BnaA01g27710D	black
BnaA01g27800D	black
BnaA01g27810D	black
BnaA01g28550D	black
BnaA01g28710D	black
BnaA01g29230D	black
BnaA01g29260D	black
BnaA01g30930D	black
BnaA01g31090D	black
BnaA01g31440D	black
BnaA01g31470D	black
BnaA01g31570D	black
BnaA01g32340D	black
BnaA01g32670D	black
BnaA01g33140D	black
BnaA01g34720D	black
BnaA01g35090D	black
BnaA01g35180D	black
BnaA01g35310D	black
BnaA01g35850D	black
BnaA01g36620D	black
BnaA01g36920D	black
BnaA01g37370D	black
BnaA02g01070D	black
BnaA02g01450D	black
BnaA02g02720D	black
BnaA02g03140D	black
BnaA02g04460D	black
BnaA02g04800D	black
BnaA02g05360D	black
BnaA02g05780D	black
BnaA02g07910D	black
BnaA02g08010D	black
BnaA02g09020D	black
BnaA02g09200D	black
BnaA02g09890D	black
BnaA02g10980D	black
BnaA02g11050D	black
BnaA02g11500D	black
BnaA02g11520D	black
BnaA02g11850D	black
BnaA02g12000D	black
BnaA02g12140D	black
BnaA02g12210D	black
BnaA02g13230D	black
BnaA02g13900D	black
BnaA02g14110D	black
BnaA02g14460D	black
BnaA02g14830D	black
BnaA02g15010D	black
BnaA02g15760D	black
BnaA02g15820D	black
BnaA02g16500D	black
BnaA02g16710D	black
BnaA02g17670D	black
BnaA02g18660D	black
BnaA02g19260D	black
BnaA02g19950D	black
BnaA02g19970D	black
BnaA02g20750D	black
BnaA02g21060D	black
BnaA02g22340D	black
BnaA02g22470D	black
BnaA02g23650D	black
BnaA02g24140D	black
BnaA02g25610D	black
BnaA02g25770D	black
BnaA02g25820D	black
BnaA02g26900D	black
BnaA02g26980D	black
BnaA02g27310D	black
BnaA02g27710D	black
BnaA02g28680D	black
BnaA02g28860D	black
BnaA02g29020D	black
BnaA02g29360D	black
BnaA02g29390D	black
BnaA02g30230D	black
BnaA02g30680D	black
BnaA02g30840D	black
BnaA02g30910D	black
BnaA02g31010D	black
BnaA02g31190D	black
BnaA02g31670D	black
BnaA02g32290D	black
BnaA02g32850D	black
BnaA02g33310D	black
BnaA02g33370D	black
BnaA02g33530D	black
BnaA02g34190D	black
BnaA02g34210D	black
BnaA02g34310D	black
BnaA02g34420D	black
BnaA02g34810D	black
BnaA02g35270D	black
BnaA03g00330D	black
BnaA03g00890D	black
BnaA03g02350D	black
BnaA03g02650D	black
BnaA03g02840D	black
BnaA03g04180D	black
BnaA03g04760D	black
BnaA03g07230D	black
BnaA03g07240D	black
BnaA03g07560D	black
BnaA03g07680D	black
BnaA03g07760D	black
BnaA03g08000D	black
BnaA03g09270D	black
BnaA03g09790D	black
BnaA03g09910D	black
BnaA03g10550D	black
BnaA03g10770D	black
BnaA03g12490D	black
BnaA03g12820D	black
BnaA03g13070D	black
BnaA03g13420D	black
BnaA03g13610D	black
BnaA03g14090D	black
BnaA03g14110D	black
BnaA03g14150D	black
BnaA03g14490D	black
BnaA03g15230D	black
BnaA03g15410D	black
BnaA03g15610D	black
BnaA03g16450D	black
BnaA03g16950D	black
BnaA03g17170D	black
BnaA03g17240D	black
BnaA03g20230D	black
BnaA03g21240D	black
BnaA03g21940D	black
BnaA03g22030D	black
BnaA03g22190D	black
BnaA03g22610D	black
BnaA03g22730D	black
BnaA03g23250D	black
BnaA03g23270D	black
BnaA03g23620D	black
BnaA03g23700D	black
BnaA03g23800D	black
BnaA03g23830D	black
BnaA03g24180D	black
BnaA03g24430D	black
BnaA03g24720D	black
BnaA03g25020D	black
BnaA03g25250D	black
BnaA03g25360D	black
BnaA03g26540D	black
BnaA03g26790D	black
BnaA03g27070D	black
BnaA03g27150D	black
BnaA03g27390D	black
BnaA03g27400D	black
BnaA03g27520D	black
BnaA03g28670D	black
BnaA03g28940D	black
BnaA03g29020D	black
BnaA03g29460D	black
BnaA03g29700D	black
BnaA03g29970D	black
BnaA03g30070D	black
BnaA03g30530D	black
BnaA03g31430D	black
BnaA03g31490D	black
BnaA03g31610D	black
BnaA03g31770D	black
BnaA03g32100D	black
BnaA03g32760D	black
BnaA03g32780D	black
BnaA03g33950D	black
BnaA03g34250D	black
BnaA03g34290D	black
BnaA03g34550D	black
BnaA03g35110D	black
BnaA03g35150D	black
BnaA03g36060D	black
BnaA03g36180D	black
BnaA03g36630D	black
BnaA03g37360D	black
BnaA03g37710D	black
BnaA03g38420D	black
BnaA03g38850D	black
BnaA03g38860D	black
BnaA03g38940D	black
BnaA03g38950D	black
BnaA03g39560D	black
BnaA03g39660D	black
BnaA03g39670D	black
BnaA03g40050D	black
BnaA03g40380D	black
BnaA03g41160D	black
BnaA03g41430D	black
BnaA03g41510D	black
BnaA03g41680D	black
BnaA03g41740D	black
BnaA03g41930D	black
BnaA03g42110D	black
BnaA03g42320D	black
BnaA03g42370D	black
BnaA03g42380D	black
BnaA03g42950D	black
BnaA03g43020D	black
BnaA03g43060D	black
BnaA03g43290D	black
BnaA03g43540D	black
BnaA03g43910D	black
BnaA03g44730D	black
BnaA03g45280D	black
BnaA03g46140D	black
BnaA03g46840D	black
BnaA03g47030D	black
BnaA03g47520D	black
BnaA03g47710D	black
BnaA03g47830D	black
BnaA03g48450D	black
BnaA03g49170D	black
BnaA03g49440D	black
BnaA03g49880D	black
BnaA03g49990D	black
BnaA03g50070D	black
BnaA03g50540D	black
BnaA03g51540D	black
BnaA03g51590D	black
BnaA03g52190D	black
BnaA03g52420D	black
BnaA03g52920D	black
BnaA03g53010D	black
BnaA03g53400D	black
BnaA03g53960D	black
BnaA03g54160D	black
BnaA03g54400D	black
BnaA03g54770D	black
BnaA03g55200D	black
BnaA03g55480D	black
BnaA03g55860D	black
BnaA03g56490D	black
BnaA03g56600D	black
BnaA03g56640D	black
BnaA03g57120D	black
BnaA03g57280D	black
BnaA03g57840D	black
BnaA03g57940D	black
BnaA03g57960D	black
BnaA04g00160D	black
BnaA04g00910D	black
BnaA04g01300D	black
BnaA04g01360D	black
BnaA04g01410D	black
BnaA04g01600D	black
BnaA04g01980D	black
BnaA04g02690D	black
BnaA04g02970D	black
BnaA04g03160D	black
BnaA04g03570D	black
BnaA04g04030D	black
BnaA04g04100D	black
BnaA04g04310D	black
BnaA04g05420D	black
BnaA04g06990D	black
BnaA04g07350D	black
BnaA04g07380D	black
BnaA04g07990D	black
BnaA04g08550D	black
BnaA04g09140D	black
BnaA04g09200D	black
BnaA04g09370D	black
BnaA04g09420D	black
BnaA04g09450D	black
BnaA04g09660D	black
BnaA04g10530D	black
BnaA04g13880D	black
BnaA04g14370D	black
BnaA04g14820D	black
BnaA04g14940D	black
BnaA04g15440D	black
BnaA04g15490D	black
BnaA04g15740D	black
BnaA04g16090D	black
BnaA04g16230D	black
BnaA04g17150D	black
BnaA04g17620D	black
BnaA04g17700D	black
BnaA04g18100D	black
BnaA04g18230D	black
BnaA04g18310D	black
BnaA04g18850D	black
BnaA04g19370D	black
BnaA04g19640D	black
BnaA04g20030D	black
BnaA04g20060D	black
BnaA04g20220D	black
BnaA04g20330D	black
BnaA04g20980D	black
BnaA04g21080D	black
BnaA04g21390D	black
BnaA04g21850D	black
BnaA04g23090D	black
BnaA04g23670D	black
BnaA04g24410D	black
BnaA04g25720D	black
BnaA04g25860D	black
BnaA04g26330D	black
BnaA04g26350D	black
BnaA04g26450D	black
BnaA04g26610D	black
BnaA04g26990D	black
BnaA04g27110D	black
BnaA04g27150D	black
BnaA04g27310D	black
BnaA04g27350D	black
BnaA04g27530D	black
BnaA04g27700D	black
BnaA04g28780D	black
BnaA04g29000D	black
BnaA04g29190D	black
BnaA04g29360D	black
BnaA04g29450D	black
BnaA04g29550D	black
BnaA05g00280D	black
BnaA05g00440D	black
BnaA05g00550D	black
BnaA05g00740D	black
BnaA05g00940D	black
BnaA05g01190D	black
BnaA05g01200D	black
BnaA05g01280D	black
BnaA05g01670D	black
BnaA05g02180D	black
BnaA05g02210D	black
BnaA05g03540D	black
BnaA05g04150D	black
BnaA05g04490D	black
BnaA05g05280D	black
BnaA05g05650D	black
BnaA05g06080D	black
BnaA05g06460D	black
BnaA05g06750D	black
BnaA05g06860D	black
BnaA05g06990D	black
BnaA05g08660D	black
BnaA05g09820D	black
BnaA05g09830D	black
BnaA05g10360D	black
BnaA05g10730D	black
BnaA05g10910D	black
BnaA05g11360D	black
BnaA05g11730D	black
BnaA05g12480D	black
BnaA05g13060D	black
BnaA05g13900D	black
BnaA05g14030D	black
BnaA05g14440D	black
BnaA05g15360D	black
BnaA05g16700D	black
BnaA05g17110D	black
BnaA05g17250D	black
BnaA05g17810D	black
BnaA05g18020D	black
BnaA05g18830D	black
BnaA05g19590D	black
BnaA05g20690D	black
BnaA05g20870D	black
BnaA05g22480D	black
BnaA05g22900D	black
BnaA05g23520D	black
BnaA05g24040D	black
BnaA05g24100D	black
BnaA05g24390D	black
BnaA05g24760D	black
BnaA05g24780D	black
BnaA05g25370D	black
BnaA05g25500D	black
BnaA05g25840D	black
BnaA05g26510D	black
BnaA05g26870D	black
BnaA05g26890D	black
BnaA05g26930D	black
BnaA05g27130D	black
BnaA05g27330D	black
BnaA05g27510D	black
BnaA05g28050D	black
BnaA05g28140D	black
BnaA05g28340D	black
BnaA05g28560D	black
BnaA05g28700D	black
BnaA05g29240D	black
BnaA05g29380D	black
BnaA05g29640D	black
BnaA05g29670D	black
BnaA05g29750D	black
BnaA05g29990D	black
BnaA05g30020D	black
BnaA05g30070D	black
BnaA05g30250D	black
BnaA05g30290D	black
BnaA05g30340D	black
BnaA05g30800D	black
BnaA05g30950D	black
BnaA05g31890D	black
BnaA05g32900D	black
BnaA05g32910D	black
BnaA05g34090D	black
BnaA05g34150D	black
BnaA05g34690D	black
BnaA05g34810D	black
BnaA05g35000D	black
BnaA05g35240D	black
BnaA05g35500D	black
BnaA05g36720D	black
BnaA05g37130D	black
BnaA05g37180D	black
BnaA06g00250D	black
BnaA06g00260D	black
BnaA06g00400D	black
BnaA06g00770D	black
BnaA06g00890D	black
BnaA06g01020D	black
BnaA06g01340D	black
BnaA06g01570D	black
BnaA06g01600D	black
BnaA06g01770D	black
BnaA06g02150D	black
BnaA06g02320D	black
BnaA06g02460D	black
BnaA06g02490D	black
BnaA06g02850D	black
BnaA06g03020D	black
BnaA06g03600D	black
BnaA06g03640D	black
BnaA06g03750D	black
BnaA06g04960D	black
BnaA06g05020D	black
BnaA06g05040D	black
BnaA06g05470D	black
BnaA06g05950D	black
BnaA06g06180D	black
BnaA06g06340D	black
BnaA06g06430D	black
BnaA06g06790D	black
BnaA06g06970D	black
BnaA06g06990D	black
BnaA06g07140D	black
BnaA06g07260D	black
BnaA06g07410D	black
BnaA06g08020D	black
BnaA06g08140D	black
BnaA06g08720D	black
BnaA06g08910D	black
BnaA06g09470D	black
BnaA06g09920D	black
BnaA06g09960D	black
BnaA06g11140D	black
BnaA06g11150D	black
BnaA06g11510D	black
BnaA06g11530D	black
BnaA06g11670D	black
BnaA06g11730D	black
BnaA06g12190D	black
BnaA06g12580D	black
BnaA06g13680D	black
BnaA06g13820D	black
BnaA06g13910D	black
BnaA06g14470D	black
BnaA06g14490D	black
BnaA06g14620D	black
BnaA06g14790D	black
BnaA06g14840D	black
BnaA06g15140D	black
BnaA06g15400D	black
BnaA06g15510D	black
BnaA06g15530D	black
BnaA06g15540D	black
BnaA06g15740D	black
BnaA06g15880D	black
BnaA06g16210D	black
BnaA06g16460D	black
BnaA06g17200D	black
BnaA06g17280D	black
BnaA06g17290D	black
BnaA06g18570D	black
BnaA06g18580D	black
BnaA06g18860D	black
BnaA06g22040D	black
BnaA06g22070D	black
BnaA06g22110D	black
BnaA06g22640D	black
BnaA06g22690D	black
BnaA06g22790D	black
BnaA06g23120D	black
BnaA06g23350D	black
BnaA06g23370D	black
BnaA06g23960D	black
BnaA06g24140D	black
BnaA06g24300D	black
BnaA06g24420D	black
BnaA06g24930D	black
BnaA06g24970D	black
BnaA06g25370D	black
BnaA06g25440D	black
BnaA06g25480D	black
BnaA06g25880D	black
BnaA06g25930D	black
BnaA06g26050D	black
BnaA06g26300D	black
BnaA06g26460D	black
BnaA06g26550D	black
BnaA06g26790D	black
BnaA06g26880D	black
BnaA06g26980D	black
BnaA06g27560D	black
BnaA06g27580D	black
BnaA06g27780D	black
BnaA06g28120D	black
BnaA06g28170D	black
BnaA06g28520D	black
BnaA06g29320D	black
BnaA06g29490D	black
BnaA06g29520D	black
BnaA06g30100D	black
BnaA06g30160D	black
BnaA06g30480D	black
BnaA06g30570D	black
BnaA06g30730D	black
BnaA06g30980D	black
BnaA06g31740D	black
BnaA06g32290D	black
BnaA06g32690D	black
BnaA06g32810D	black
BnaA06g32910D	black
BnaA06g33240D	black
BnaA06g33290D	black
BnaA06g33420D	black
BnaA06g33510D	black
BnaA06g33610D	black
BnaA06g34670D	black
BnaA06g34710D	black
BnaA06g35220D	black
BnaA06g35440D	black
BnaA06g35450D	black
BnaA06g35470D	black
BnaA06g35660D	black
BnaA06g36920D	black
BnaA06g37860D	black
BnaA06g37960D	black
BnaA06g38640D	black
BnaA06g38880D	black
BnaA06g39280D	black
BnaA06g39420D	black
BnaA06g39570D	black
BnaA06g40040D	black
BnaA06g40090D	black
BnaA07g00050D	black
BnaA07g00210D	black
BnaA07g00460D	black
BnaA07g00540D	black
BnaA07g00960D	black
BnaA07g01550D	black
BnaA07g01810D	black
BnaA07g02070D	black
BnaA07g02490D	black
BnaA07g02580D	black
BnaA07g02890D	black
BnaA07g03090D	black
BnaA07g03130D	black
BnaA07g03570D	black
BnaA07g03740D	black
BnaA07g03930D	black
BnaA07g04390D	black
BnaA07g05040D	black
BnaA07g05740D	black
BnaA07g05990D	black
BnaA07g06170D	black
BnaA07g06860D	black
BnaA07g06880D	black
BnaA07g07050D	black
BnaA07g07160D	black
BnaA07g07980D	black
BnaA07g08880D	black
BnaA07g08920D	black
BnaA07g08940D	black
BnaA07g09060D	black
BnaA07g09120D	black
BnaA07g09270D	black
BnaA07g09430D	black
BnaA07g10260D	black
BnaA07g10350D	black
BnaA07g11160D	black
BnaA07g11360D	black
BnaA07g11370D	black
BnaA07g11750D	black
BnaA07g12410D	black
BnaA07g12810D	black
BnaA07g13030D	black
BnaA07g13420D	black
BnaA07g13470D	black
BnaA07g14280D	black
BnaA07g14310D	black
BnaA07g14520D	black
BnaA07g14720D	black
BnaA07g15150D	black
BnaA07g15180D	black
BnaA07g15690D	black
BnaA07g15810D	black
BnaA07g15940D	black
BnaA07g16180D	black
BnaA07g16340D	black
BnaA07g16540D	black
BnaA07g18570D	black
BnaA07g18630D	black
BnaA07g19180D	black
BnaA07g19190D	black
BnaA07g19540D	black
BnaA07g20300D	black
BnaA07g20490D	black
BnaA07g21010D	black
BnaA07g21520D	black
BnaA07g21590D	black
BnaA07g21830D	black
BnaA07g23890D	black
BnaA07g26810D	black
BnaA07g28040D	black
BnaA07g30200D	black
BnaA07g31450D	black
BnaA07g32900D	black
BnaA07g33060D	black
BnaA07g33790D	black
BnaA07g33920D	black
BnaA07g35640D	black
BnaA07g35730D	black
BnaA07g36800D	black
BnaA07g37270D	black
BnaA07g37420D	black
BnaA07g37630D	black
BnaA07g38170D	black
BnaA07g38210D	black
BnaA07g38770D	black
BnaA08g00050D	black
BnaA08g00600D	black
BnaA08g00900D	black
BnaA08g00990D	black
BnaA08g01750D	black
BnaA08g01820D	black
BnaA08g01960D	black
BnaA08g02140D	black
BnaA08g02360D	black
BnaA08g02800D	black
BnaA08g04250D	black
BnaA08g04470D	black
BnaA08g04930D	black
BnaA08g06090D	black
BnaA08g06440D	black
BnaA08g06710D	black
BnaA08g06870D	black
BnaA08g08500D	black
BnaA08g08510D	black
BnaA08g09030D	black
BnaA08g09690D	black
BnaA08g10170D	black
BnaA08g10180D	black
BnaA08g10230D	black
BnaA08g10300D	black
BnaA08g10780D	black
BnaA08g11500D	black
BnaA08g11650D	black
BnaA08g12450D	black
BnaA08g14100D	black
BnaA08g14130D	black
BnaA08g14270D	black
BnaA08g14490D	black
BnaA08g14640D	black
BnaA08g14740D	black
BnaA08g15420D	black
BnaA08g16100D	black
BnaA08g16700D	black
BnaA08g16740D	black
BnaA08g16860D	black
BnaA08g17100D	black
BnaA08g17300D	black
BnaA08g17760D	black
BnaA08g17960D	black
BnaA08g18360D	black
BnaA08g18450D	black
BnaA08g18840D	black
BnaA08g18870D	black
BnaA08g19240D	black
BnaA08g19260D	black
BnaA08g19270D	black
BnaA08g19950D	black
BnaA08g20080D	black
BnaA08g20280D	black
BnaA08g20290D	black
BnaA08g20770D	black
BnaA08g21050D	black
BnaA08g21130D	black
BnaA08g21550D	black
BnaA08g21670D	black
BnaA08g21730D	black
BnaA08g22290D	black
BnaA08g22490D	black
BnaA08g23040D	black
BnaA08g23300D	black
BnaA08g23360D	black
BnaA08g23830D	black
BnaA08g23940D	black
BnaA08g24300D	black
BnaA08g24530D	black
BnaA08g24580D	black
BnaA08g25660D	black
BnaA08g25790D	black
BnaA08g26100D	black
BnaA08g26150D	black
BnaA08g26890D	black
BnaA08g27100D	black
BnaA08g27270D	black
BnaA08g27340D	black
BnaA08g27380D	black
BnaA08g27630D	black
BnaA08g27640D	black
BnaA08g27710D	black
BnaA08g27820D	black
BnaA08g27870D	black
BnaA08g27890D	black
BnaA08g28020D	black
BnaA08g28460D	black
BnaA08g28940D	black
BnaA08g29000D	black
BnaA08g29260D	black
BnaA08g29800D	black
BnaA08g29820D	black
BnaA08g30600D	black
BnaA08g30980D	black
BnaA08g31250D	black
BnaA08g31540D	black
BnaA09g00710D	black
BnaA09g01540D	black
BnaA09g01980D	black
BnaA09g02060D	black
BnaA09g05220D	black
BnaA09g05760D	black
BnaA09g06680D	black
BnaA09g06870D	black
BnaA09g07050D	black
BnaA09g07080D	black
BnaA09g08200D	black
BnaA09g08410D	black
BnaA09g09140D	black
BnaA09g09460D	black
BnaA09g09520D	black
BnaA09g09850D	black
BnaA09g11210D	black
BnaA09g11230D	black
BnaA09g12020D	black
BnaA09g12170D	black
BnaA09g12780D	black
BnaA09g13610D	black
BnaA09g14350D	black
BnaA09g14590D	black
BnaA09g15510D	black
BnaA09g15730D	black
BnaA09g16390D	black
BnaA09g17290D	black
BnaA09g17390D	black
BnaA09g17790D	black
BnaA09g18130D	black
BnaA09g18360D	black
BnaA09g18370D	black
BnaA09g18440D	black
BnaA09g18770D	black
BnaA09g18880D	black
BnaA09g18920D	black
BnaA09g19080D	black
BnaA09g19250D	black
BnaA09g19890D	black
BnaA09g19970D	black
BnaA09g20180D	black
BnaA09g20350D	black
BnaA09g22660D	black
BnaA09g23470D	black
BnaA09g23560D	black
BnaA09g24170D	black
BnaA09g26080D	black
BnaA09g26820D	black
BnaA09g26850D	black
BnaA09g27350D	black
BnaA09g27360D	black
BnaA09g27410D	black
BnaA09g27690D	black
BnaA09g27760D	black
BnaA09g28000D	black
BnaA09g28990D	black
BnaA09g29530D	black
BnaA09g30050D	black
BnaA09g30140D	black
BnaA09g30200D	black
BnaA09g30360D	black
BnaA09g30490D	black
BnaA09g31000D	black
BnaA09g31450D	black
BnaA09g31740D	black
BnaA09g32340D	black
BnaA09g32690D	black
BnaA09g32720D	black
BnaA09g33400D	black
BnaA09g33680D	black
BnaA09g33870D	black
BnaA09g34050D	black
BnaA09g34500D	black
BnaA09g34670D	black
BnaA09g34690D	black
BnaA09g35000D	black
BnaA09g36020D	black
BnaA09g37880D	black
BnaA09g38920D	black
BnaA09g39230D	black
BnaA09g40340D	black
BnaA09g40400D	black
BnaA09g40610D	black
BnaA09g40710D	black
BnaA09g40940D	black
BnaA09g41050D	black
BnaA09g41580D	black
BnaA09g42000D	black
BnaA09g42160D	black
BnaA09g42310D	black
BnaA09g42580D	black
BnaA09g42730D	black
BnaA09g43120D	black
BnaA09g43200D	black
BnaA09g43240D	black
BnaA09g43480D	black
BnaA09g43650D	black
BnaA09g44170D	black
BnaA09g44550D	black
BnaA09g44980D	black
BnaA09g45490D	black
BnaA09g45870D	black
BnaA09g46150D	black
BnaA09g46650D	black
BnaA09g46770D	black
BnaA09g47340D	black
BnaA09g47450D	black
BnaA09g47800D	black
BnaA09g49870D	black
BnaA09g53040D	black
BnaA09g54150D	black
BnaA09g55270D	black
BnaA09g55390D	black
BnaA09g55460D	black
BnaA09g55570D	black
BnaA09g55960D	black
BnaA09g56400D	black
BnaA09g56820D	black
BnaA10g00050D	black
BnaA10g00420D	black
BnaA10g00930D	black
BnaA10g01920D	black
BnaA10g02470D	black
BnaA10g02540D	black
BnaA10g02580D	black
BnaA10g02720D	black
BnaA10g02930D	black
BnaA10g03050D	black
BnaA10g03550D	black
BnaA10g03970D	black
BnaA10g04310D	black
BnaA10g04680D	black
BnaA10g05390D	black
BnaA10g05480D	black
BnaA10g05590D	black
BnaA10g05880D	black
BnaA10g06740D	black
BnaA10g06760D	black
BnaA10g06960D	black
BnaA10g08360D	black
BnaA10g08450D	black
BnaA10g09380D	black
BnaA10g09640D	black
BnaA10g09780D	black
BnaA10g09960D	black
BnaA10g10400D	black
BnaA10g10580D	black
BnaA10g10970D	black
BnaA10g11080D	black
BnaA10g11100D	black
BnaA10g11760D	black
BnaA10g12140D	black
BnaA10g12450D	black
BnaA10g12490D	black
BnaA10g13210D	black
BnaA10g13820D	black
BnaA10g13840D	black
BnaA10g14320D	black
BnaA10g14910D	black
BnaA10g14960D	black
BnaA10g15060D	black
BnaA10g15220D	black
BnaA10g15480D	black
BnaA10g15690D	black
BnaA10g15880D	black
BnaA10g16060D	black
BnaA10g16290D	black
BnaA10g16320D	black
BnaA10g16330D	black
BnaA10g16350D	black
BnaA10g16860D	black
BnaA10g16920D	black
BnaA10g17220D	black
BnaA10g19050D	black
BnaA10g19070D	black
BnaA10g19300D	black
BnaA10g19490D	black
BnaA10g19660D	black
BnaA10g19870D	black
BnaA10g19990D	black
BnaA10g20190D	black
BnaA10g20330D	black
BnaA10g22450D	black
BnaA10g22880D	black
BnaA10g23220D	black
BnaA10g23710D	black
BnaA10g24180D	black
BnaA10g24260D	black
BnaA10g24400D	black
BnaA10g24440D	black
BnaA10g24940D	black
BnaA10g25000D	black
BnaA10g25640D	black
BnaA10g25690D	black
BnaA10g25700D	black
BnaA10g25840D	black
BnaA10g25980D	black
BnaA10g27420D	black
BnaA10g28000D	black
BnaA10g28060D	black
BnaA10g28530D	black
BnaA10g29290D	black
BnaA10g29350D	black
BnaA10g29610D	black
BnaA10g30270D	black
BnaAnng00010D	black
BnaAnng01300D	black
BnaAnng02090D	black
BnaAnng02260D	black
BnaAnng03090D	black
BnaAnng03390D	black
BnaAnng04200D	black
BnaAnng04520D	black
BnaAnng05430D	black
BnaAnng05830D	black
BnaAnng06860D	black
BnaAnng06940D	black
BnaAnng07020D	black
BnaAnng08360D	black
BnaAnng09960D	black
BnaAnng10090D	black
BnaAnng10220D	black
BnaAnng10330D	black
BnaAnng11060D	black
BnaAnng11650D	black
BnaAnng12320D	black
BnaAnng12600D	black
BnaAnng13370D	black
BnaAnng13840D	black
BnaAnng14530D	black
BnaAnng14550D	black
BnaAnng15180D	black
BnaAnng15540D	black
BnaAnng15800D	black
BnaAnng16540D	black
BnaAnng16560D	black
BnaAnng17320D	black
BnaAnng17370D	black
BnaAnng18710D	black
BnaAnng18890D	black
BnaAnng20340D	black
BnaAnng20990D	black
BnaAnng21740D	black
BnaAnng22140D	black
BnaAnng23920D	black
BnaAnng26170D	black
BnaAnng26530D	black
BnaAnng27210D	black
BnaAnng27540D	black
BnaAnng27630D	black
BnaAnng30500D	black
BnaAnng30540D	black
BnaAnng31150D	black
BnaAnng31270D	black
BnaAnng31680D	black
BnaAnng32620D	black
BnaAnng32740D	black
BnaAnng32790D	black
BnaAnng32910D	black
BnaAnng34650D	black
BnaAnng34920D	black
BnaAnng35040D	black
BnaAnng37740D	black
BnaAnng38020D	black
BnaAnng38540D	black
BnaAnng39990D	black
BnaAnng41110D	black
BnaC01g01370D	black
BnaC01g02010D	black
BnaC01g02930D	black
BnaC01g03310D	black
BnaC01g03430D	black
BnaC01g03510D	black
BnaC01g03880D	black
BnaC01g04950D	black
BnaC01g05030D	black
BnaC01g05300D	black
BnaC01g05570D	black
BnaC01g05650D	black
BnaC01g05880D	black
BnaC01g06260D	black
BnaC01g06320D	black
BnaC01g06660D	black
BnaC01g07080D	black
BnaC01g07090D	black
BnaC01g07380D	black
BnaC01g07450D	black
BnaC01g08020D	black
BnaC01g08640D	black
BnaC01g08650D	black
BnaC01g09110D	black
BnaC01g09420D	black
BnaC01g09520D	black
BnaC01g10800D	black
BnaC01g11380D	black
BnaC01g11530D	black
BnaC01g12860D	black
BnaC01g12890D	black
BnaC01g13000D	black
BnaC01g13410D	black
BnaC01g13420D	black
BnaC01g13590D	black
BnaC01g13740D	black
BnaC01g15060D	black
BnaC01g15460D	black
BnaC01g16320D	black
BnaC01g16410D	black
BnaC01g16540D	black
BnaC01g17610D	black
BnaC01g18130D	black
BnaC01g18140D	black
BnaC01g18580D	black
BnaC01g19150D	black
BnaC01g19260D	black
BnaC01g19370D	black
BnaC01g19720D	black
BnaC01g20360D	black
BnaC01g20610D	black
BnaC01g21650D	black
BnaC01g21920D	black
BnaC01g22200D	black
BnaC01g22630D	black
BnaC01g22950D	black
BnaC01g24300D	black
BnaC01g24540D	black
BnaC01g25430D	black
BnaC01g25830D	black
BnaC01g27610D	black
BnaC01g29910D	black
BnaC01g30110D	black
BnaC01g31190D	black
BnaC01g31300D	black
BnaC01g32650D	black
BnaC01g34620D	black
BnaC01g35960D	black
BnaC01g39530D	black
BnaC01g39750D	black
BnaC01g39780D	black
BnaC01g40820D	black
BnaC01g41070D	black
BnaC01g41640D	black
BnaC01g42860D	black
BnaC01g43070D	black
BnaC01g44400D	black
BnaC02g04530D	black
BnaC02g15280D	black
BnaC02g16290D	black
BnaC02g18410D	black
BnaC02g20120D	black
BnaC02g20990D	black
BnaC02g21570D	black
BnaC02g21720D	black
BnaC02g23290D	black
BnaC02g24210D	black
BnaC02g25850D	black
BnaC02g27000D	black
BnaC02g27200D	black
BnaC02g28790D	black
BnaC02g30680D	black
BnaC02g31320D	black
BnaC02g31920D	black
BnaC02g32760D	black
BnaC02g33930D	black
BnaC02g33940D	black
BnaC02g35820D	black
BnaC02g38350D	black
BnaC02g39030D	black
BnaC02g40790D	black
BnaC02g41620D	black
BnaC02g42180D	black
BnaC02g42280D	black
BnaC02g42480D	black
BnaC02g42740D	black
BnaC02g43020D	black
BnaC02g43620D	black
BnaC02g43700D	black
BnaC02g44950D	black
BnaC02g46640D	black
BnaC02g48430D	black
BnaC02g48800D	black
BnaC03g00220D	black
BnaC03g05060D	black
BnaC03g05900D	black
BnaC03g06300D	black
BnaC03g07930D	black
BnaC03g09520D	black
BnaC03g10030D	black
BnaC03g11850D	black
BnaC03g12710D	black
BnaC03g13250D	black
BnaC03g13670D	black
BnaC03g14810D	black
BnaC03g15360D	black
BnaC03g16230D	black
BnaC03g17050D	black
BnaC03g17070D	black
BnaC03g17120D	black
BnaC03g17530D	black
BnaC03g17930D	black
BnaC03g18630D	black
BnaC03g18820D	black
BnaC03g19100D	black
BnaC03g19120D	black
BnaC03g19460D	black
BnaC03g19530D	black
BnaC03g19780D	black
BnaC03g20060D	black
BnaC03g20530D	black
BnaC03g20680D	black
BnaC03g20720D	black
BnaC03g21010D	black
BnaC03g21300D	black
BnaC03g21840D	black
BnaC03g22090D	black
BnaC03g22110D	black
BnaC03g22260D	black
BnaC03g22310D	black
BnaC03g23740D	black
BnaC03g25150D	black
BnaC03g25390D	black
BnaC03g25800D	black
BnaC03g25960D	black
BnaC03g26040D	black
BnaC03g26300D	black
BnaC03g26400D	black
BnaC03g26660D	black
BnaC03g26770D	black
BnaC03g27200D	black
BnaC03g27480D	black
BnaC03g27500D	black
BnaC03g27690D	black
BnaC03g28040D	black
BnaC03g28140D	black
BnaC03g28330D	black
BnaC03g28610D	black
BnaC03g28620D	black
BnaC03g28800D	black
BnaC03g29050D	black
BnaC03g29060D	black
BnaC03g29470D	black
BnaC03g29650D	black
BnaC03g30410D	black
BnaC03g30720D	black
BnaC03g30890D	black
BnaC03g30980D	black
BnaC03g31090D	black
BnaC03g31400D	black
BnaC03g31450D	black
BnaC03g31730D	black
BnaC03g32110D	black
BnaC03g32140D	black
BnaC03g32530D	black
BnaC03g33080D	black
BnaC03g33790D	black
BnaC03g34120D	black
BnaC03g34730D	black
BnaC03g34750D	black
BnaC03g34940D	black
BnaC03g35130D	black
BnaC03g35240D	black
BnaC03g35340D	black
BnaC03g36710D	black
BnaC03g36840D	black
BnaC03g37230D	black
BnaC03g37340D	black
BnaC03g37800D	black
BnaC03g37860D	black
BnaC03g37870D	black
BnaC03g37880D	black
BnaC03g37920D	black
BnaC03g38230D	black
BnaC03g38920D	black
BnaC03g39170D	black
BnaC03g39720D	black
BnaC03g40040D	black
BnaC03g40810D	black
BnaC03g41910D	black
BnaC03g42410D	black
BnaC03g42780D	black
BnaC03g43790D	black
BnaC03g44190D	black
BnaC03g44530D	black
BnaC03g44750D	black
BnaC03g45260D	black
BnaC03g45740D	black
BnaC03g45990D	black
BnaC03g46700D	black
BnaC03g47050D	black
BnaC03g47510D	black
BnaC03g47560D	black
BnaC03g48530D	black
BnaC03g48650D	black
BnaC03g48970D	black
BnaC03g49070D	black
BnaC03g49290D	black
BnaC03g49550D	black
BnaC03g49780D	black
BnaC03g49800D	black
BnaC03g49970D	black
BnaC03g50150D	black
BnaC03g50280D	black
BnaC03g50490D	black
BnaC03g51980D	black
BnaC03g52150D	black
BnaC03g52570D	black
BnaC03g54460D	black
BnaC03g54530D	black
BnaC03g54780D	black
BnaC03g54910D	black
BnaC03g55710D	black
BnaC03g56460D	black
BnaC03g56470D	black
BnaC03g57050D	black
BnaC03g57310D	black
BnaC03g57650D	black
BnaC03g57700D	black
BnaC03g58600D	black
BnaC03g59060D	black
BnaC03g59440D	black
BnaC03g59540D	black
BnaC03g59610D	black
BnaC03g59760D	black
BnaC03g60020D	black
BnaC03g60130D	black
BnaC03g60240D	black
BnaC03g60390D	black
BnaC03g61080D	black
BnaC03g63740D	black
BnaC03g64390D	black
BnaC03g64860D	black
BnaC03g65490D	black
BnaC03g65520D	black
BnaC03g66460D	black
BnaC03g67110D	black
BnaC03g67560D	black
BnaC03g67610D	black
BnaC03g67980D	black
BnaC03g68530D	black
BnaC03g69320D	black
BnaC03g69940D	black
BnaC03g70120D	black
BnaC03g70390D	black
BnaC03g70630D	black
BnaC03g71050D	black
BnaC03g72590D	black
BnaC03g72600D	black
BnaC03g73640D	black
BnaC03g73810D	black
BnaC03g74220D	black
BnaC03g74450D	black
BnaC03g74750D	black
BnaC03g74850D	black
BnaC03g75170D	black
BnaC03g75640D	black
BnaC03g77160D	black
BnaC03g77370D	black
BnaC03g77820D	black
BnaC03g77920D	black
BnaC03g77950D	black
BnaC03g78230D	black
BnaC03g78250D	black
BnaC04g00290D	black
BnaC04g00350D	black
BnaC04g02270D	black
BnaC04g02760D	black
BnaC04g02980D	black
BnaC04g03320D	black
BnaC04g03340D	black
BnaC04g03380D	black
BnaC04g03740D	black
BnaC04g04400D	black
BnaC04g04520D	black
BnaC04g04680D	black
BnaC04g05620D	black
BnaC04g06010D	black
BnaC04g06690D	black
BnaC04g07620D	black
BnaC04g07720D	black
BnaC04g07890D	black
BnaC04g07900D	black
BnaC04g08290D	black
BnaC04g09270D	black
BnaC04g09540D	black
BnaC04g09800D	black
BnaC04g10300D	black
BnaC04g10920D	black
BnaC04g11280D	black
BnaC04g11760D	black
BnaC04g12310D	black
BnaC04g12550D	black
BnaC04g14960D	black
BnaC04g16030D	black
BnaC04g16320D	black
BnaC04g16470D	black
BnaC04g17070D	black
BnaC04g17090D	black
BnaC04g17130D	black
BnaC04g17220D	black
BnaC04g17750D	black
BnaC04g18340D	black
BnaC04g18440D	black
BnaC04g20620D	black
BnaC04g20970D	black
BnaC04g22060D	black
BnaC04g23020D	black
BnaC04g23410D	black
BnaC04g25160D	black
BnaC04g25470D	black
BnaC04g25620D	black
BnaC04g26110D	black
BnaC04g26280D	black
BnaC04g26450D	black
BnaC04g28190D	black
BnaC04g28350D	black
BnaC04g28780D	black
BnaC04g29600D	black
BnaC04g30410D	black
BnaC04g30990D	black
BnaC04g31420D	black
BnaC04g31670D	black
BnaC04g31680D	black
BnaC04g32180D	black
BnaC04g32800D	black
BnaC04g33510D	black
BnaC04g36260D	black
BnaC04g36320D	black
BnaC04g36370D	black
BnaC04g36430D	black
BnaC04g37620D	black
BnaC04g38630D	black
BnaC04g38650D	black
BnaC04g39370D	black
BnaC04g40620D	black
BnaC04g40710D	black
BnaC04g40870D	black
BnaC04g41340D	black
BnaC04g41500D	black
BnaC04g41760D	black
BnaC04g42000D	black
BnaC04g42130D	black
BnaC04g42270D	black
BnaC04g42310D	black
BnaC04g42390D	black
BnaC04g43700D	black
BnaC04g44070D	black
BnaC04g44530D	black
BnaC04g44780D	black
BnaC04g45720D	black
BnaC04g47560D	black
BnaC04g49880D	black
BnaC04g50970D	black
BnaC04g52040D	black
BnaC04g52160D	black
BnaC04g52510D	black
BnaC04g52600D	black
BnaC04g52750D	black
BnaC04g53340D	black
BnaC04g53430D	black
BnaC04g53720D	black
BnaC04g54290D	black
BnaC04g55090D	black
BnaC04g55240D	black
BnaC05g00510D	black
BnaC05g00520D	black
BnaC05g00630D	black
BnaC05g00740D	black
BnaC05g00810D	black
BnaC05g00850D	black
BnaC05g01050D	black
BnaC05g01770D	black
BnaC05g01860D	black
BnaC05g02030D	black
BnaC05g02300D	black
BnaC05g02340D	black
BnaC05g02550D	black
BnaC05g02560D	black
BnaC05g02700D	black
BnaC05g03440D	black
BnaC05g03470D	black
BnaC05g04090D	black
BnaC05g04250D	black
BnaC05g04530D	black
BnaC05g04790D	black
BnaC05g05030D	black
BnaC05g05100D	black
BnaC05g05690D	black
BnaC05g05890D	black
BnaC05g06060D	black
BnaC05g06220D	black
BnaC05g07290D	black
BnaC05g07920D	black
BnaC05g08450D	black
BnaC05g08620D	black
BnaC05g08640D	black
BnaC05g09400D	black
BnaC05g10300D	black
BnaC05g10820D	black
BnaC05g10840D	black
BnaC05g10900D	black
BnaC05g11580D	black
BnaC05g11630D	black
BnaC05g12460D	black
BnaC05g12690D	black
BnaC05g13390D	black
BnaC05g13400D	black
BnaC05g13520D	black
BnaC05g13570D	black
BnaC05g13670D	black
BnaC05g13940D	black
BnaC05g14270D	black
BnaC05g14320D	black
BnaC05g15250D	black
BnaC05g15330D	black
BnaC05g16260D	black
BnaC05g16290D	black
BnaC05g16300D	black
BnaC05g17000D	black
BnaC05g17140D	black
BnaC05g17350D	black
BnaC05g17440D	black
BnaC05g18500D	black
BnaC05g18830D	black
BnaC05g19020D	black
BnaC05g20530D	black
BnaC05g20630D	black
BnaC05g21530D	black
BnaC05g21570D	black
BnaC05g21730D	black
BnaC05g21770D	black
BnaC05g21780D	black
BnaC05g22420D	black
BnaC05g22500D	black
BnaC05g24480D	black
BnaC05g24560D	black
BnaC05g25250D	black
BnaC05g26270D	black
BnaC05g26380D	black
BnaC05g27530D	black
BnaC05g28240D	black
BnaC05g28450D	black
BnaC05g29100D	black
BnaC05g29330D	black
BnaC05g29410D	black
BnaC05g29870D	black
BnaC05g30110D	black
BnaC05g30190D	black
BnaC05g30250D	black
BnaC05g30260D	black
BnaC05g30700D	black
BnaC05g30730D	black
BnaC05g31670D	black
BnaC05g31840D	black
BnaC05g33360D	black
BnaC05g34160D	black
BnaC05g34290D	black
BnaC05g34990D	black
BnaC05g36090D	black
BnaC05g37200D	black
BnaC05g37310D	black
BnaC05g37490D	black
BnaC05g37800D	black
BnaC05g38410D	black
BnaC05g38440D	black
BnaC05g38790D	black
BnaC05g38810D	black
BnaC05g41380D	black
BnaC05g41510D	black
BnaC05g42050D	black
BnaC05g43050D	black
BnaC05g44140D	black
BnaC05g44580D	black
BnaC05g44620D	black
BnaC05g44630D	black
BnaC05g44660D	black
BnaC05g45010D	black
BnaC05g45570D	black
BnaC05g48190D	black
BnaC05g49350D	black
BnaC05g49970D	black
BnaC05g50780D	black
BnaC05g51500D	black
BnaC06g00260D	black
BnaC06g01320D	black
BnaC06g01630D	black
BnaC06g02150D	black
BnaC06g02170D	black
BnaC06g02320D	black
BnaC06g02520D	black
BnaC06g02710D	black
BnaC06g02830D	black
BnaC06g03880D	black
BnaC06g04380D	black
BnaC06g04440D	black
BnaC06g04600D	black
BnaC06g04770D	black
BnaC06g05290D	black
BnaC06g07120D	black
BnaC06g07310D	black
BnaC06g07640D	black
BnaC06g07680D	black
BnaC06g07830D	black
BnaC06g08280D	black
BnaC06g09300D	black
BnaC06g09690D	black
BnaC06g10060D	black
BnaC06g10480D	black
BnaC06g11790D	black
BnaC06g11890D	black
BnaC06g12220D	black
BnaC06g12320D	black
BnaC06g12390D	black
BnaC06g13560D	black
BnaC06g15130D	black
BnaC06g15660D	black
BnaC06g15690D	black
BnaC06g15750D	black
BnaC06g16140D	black
BnaC06g16310D	black
BnaC06g16360D	black
BnaC06g16610D	black
BnaC06g16660D	black
BnaC06g16800D	black
BnaC06g17540D	black
BnaC06g18350D	black
BnaC06g18620D	black
BnaC06g19600D	black
BnaC06g21070D	black
BnaC06g21830D	black
BnaC06g22030D	black
BnaC06g22200D	black
BnaC06g22280D	black
BnaC06g24030D	black
BnaC06g24750D	black
BnaC06g27800D	black
BnaC06g30680D	black
BnaC06g32430D	black
BnaC06g35810D	black
BnaC06g37420D	black
BnaC06g37440D	black
BnaC06g37610D	black
BnaC06g41050D	black
BnaC06g41130D	black
BnaC06g41850D	black
BnaC06g41950D	black
BnaC06g42880D	black
BnaC07g00150D	black
BnaC07g00650D	black
BnaC07g00800D	black
BnaC07g00870D	black
BnaC07g01100D	black
BnaC07g01150D	black
BnaC07g02850D	black
BnaC07g03170D	black
BnaC07g03550D	black
BnaC07g04280D	black
BnaC07g06170D	black
BnaC07g06340D	black
BnaC07g06500D	black
BnaC07g07560D	black
BnaC07g07660D	black
BnaC07g07730D	black
BnaC07g08770D	black
BnaC07g09870D	black
BnaC07g09890D	black
BnaC07g09960D	black
BnaC07g10490D	black
BnaC07g11080D	black
BnaC07g11340D	black
BnaC07g11560D	black
BnaC07g12320D	black
BnaC07g12800D	black
BnaC07g12860D	black
BnaC07g12870D	black
BnaC07g14320D	black
BnaC07g14490D	black
BnaC07g14700D	black
BnaC07g15000D	black
BnaC07g15280D	black
BnaC07g15700D	black
BnaC07g15940D	black
BnaC07g15960D	black
BnaC07g16450D	black
BnaC07g16540D	black
BnaC07g16840D	black
BnaC07g17040D	black
BnaC07g17400D	black
BnaC07g18010D	black
BnaC07g18710D	black
BnaC07g19540D	black
BnaC07g19820D	black
BnaC07g20160D	black
BnaC07g20200D	black
BnaC07g20310D	black
BnaC07g20530D	black
BnaC07g21030D	black
BnaC07g21430D	black
BnaC07g21730D	black
BnaC07g22620D	black
BnaC07g22660D	black
BnaC07g23050D	black
BnaC07g23660D	black
BnaC07g24600D	black
BnaC07g24750D	black
BnaC07g24800D	black
BnaC07g25270D	black
BnaC07g25690D	black
BnaC07g26120D	black
BnaC07g26220D	black
BnaC07g27160D	black
BnaC07g27190D	black
BnaC07g27790D	black
BnaC07g28070D	black
BnaC07g28270D	black
BnaC07g28370D	black
BnaC07g28800D	black
BnaC07g28830D	black
BnaC07g29220D	black
BnaC07g29470D	black
BnaC07g29780D	black
BnaC07g29960D	black
BnaC07g30150D	black
BnaC07g30410D	black
BnaC07g30670D	black
BnaC07g30850D	black
BnaC07g31110D	black
BnaC07g31350D	black
BnaC07g31540D	black
BnaC07g32260D	black
BnaC07g32480D	black
BnaC07g32520D	black
BnaC07g32560D	black
BnaC07g32720D	black
BnaC07g32950D	black
BnaC07g33010D	black
BnaC07g33180D	black
BnaC07g33400D	black
BnaC07g33610D	black
BnaC07g34190D	black
BnaC07g34480D	black
BnaC07g34680D	black
BnaC07g35730D	black
BnaC07g36060D	black
BnaC07g36310D	black
BnaC07g36750D	black
BnaC07g37190D	black
BnaC07g38590D	black
BnaC07g38680D	black
BnaC07g39060D	black
BnaC07g39420D	black
BnaC07g39770D	black
BnaC07g39990D	black
BnaC07g40100D	black
BnaC07g40320D	black
BnaC07g40350D	black
BnaC07g40440D	black
BnaC07g40860D	black
BnaC07g41420D	black
BnaC07g41720D	black
BnaC07g42730D	black
BnaC07g43290D	black
BnaC07g43320D	black
BnaC07g43930D	black
BnaC07g44160D	black
BnaC07g44580D	black
BnaC07g44670D	black
BnaC07g44840D	black
BnaC07g45040D	black
BnaC07g45200D	black
BnaC07g45580D	black
BnaC07g45950D	black
BnaC07g46150D	black
BnaC07g46190D	black
BnaC07g46510D	black
BnaC07g46660D	black
BnaC07g46810D	black
BnaC07g47640D	black
BnaC07g48790D	black
BnaC07g49380D	black
BnaC07g49550D	black
BnaC07g49730D	black
BnaC07g49740D	black
BnaC07g50270D	black
BnaC07g50480D	black
BnaC07g50780D	black
BnaC07g50870D	black
BnaC07g50900D	black
BnaC07g51230D	black
BnaC08g00070D	black
BnaC08g00390D	black
BnaC08g00510D	black
BnaC08g00610D	black
BnaC08g00670D	black
BnaC08g00690D	black
BnaC08g01680D	black
BnaC08g01710D	black
BnaC08g02140D	black
BnaC08g02280D	black
BnaC08g02360D	black
BnaC08g02460D	black
BnaC08g04900D	black
BnaC08g04930D	black
BnaC08g04990D	black
BnaC08g06030D	black
BnaC08g06440D	black
BnaC08g06450D	black
BnaC08g07130D	black
BnaC08g07640D	black
BnaC08g08080D	black
BnaC08g09940D	black
BnaC08g11110D	black
BnaC08g11760D	black
BnaC08g11770D	black
BnaC08g12060D	black
BnaC08g12330D	black
BnaC08g12340D	black
BnaC08g12400D	black
BnaC08g12490D	black
BnaC08g12540D	black
BnaC08g13040D	black
BnaC08g13110D	black
BnaC08g13160D	black
BnaC08g13550D	black
BnaC08g13970D	black
BnaC08g14140D	black
BnaC08g14250D	black
BnaC08g14700D	black
BnaC08g14950D	black
BnaC08g15540D	black
BnaC08g15870D	black
BnaC08g16190D	black
BnaC08g16340D	black
BnaC08g16690D	black
BnaC08g16730D	black
BnaC08g16840D	black
BnaC08g16960D	black
BnaC08g17440D	black
BnaC08g18000D	black
BnaC08g18450D	black
BnaC08g19040D	black
BnaC08g19180D	black
BnaC08g19360D	black
BnaC08g19450D	black
BnaC08g19590D	black
BnaC08g19650D	black
BnaC08g20040D	black
BnaC08g20070D	black
BnaC08g20750D	black
BnaC08g20780D	black
BnaC08g20880D	black
BnaC08g21210D	black
BnaC08g22650D	black
BnaC08g23050D	black
BnaC08g23110D	black
BnaC08g23150D	black
BnaC08g23560D	black
BnaC08g24420D	black
BnaC08g24660D	black
BnaC08g24680D	black
BnaC08g24970D	black
BnaC08g25170D	black
BnaC08g25420D	black
BnaC08g25440D	black
BnaC08g25870D	black
BnaC08g26190D	black
BnaC08g27240D	black
BnaC08g28610D	black
BnaC08g29250D	black
BnaC08g30130D	black
BnaC08g33210D	black
BnaC08g33440D	black
BnaC08g33590D	black
BnaC08g34170D	black
BnaC08g35040D	black
BnaC08g35080D	black
BnaC08g35370D	black
BnaC08g35610D	black
BnaC08g35820D	black
BnaC08g36280D	black
BnaC08g37730D	black
BnaC08g38480D	black
BnaC08g38620D	black
BnaC08g38890D	black
BnaC08g39340D	black
BnaC08g40040D	black
BnaC08g40670D	black
BnaC08g41620D	black
BnaC08g42050D	black
BnaC08g43100D	black
BnaC08g46660D	black
BnaC08g46850D	black
BnaC08g47260D	black
BnaC08g48080D	black
BnaC08g48800D	black
BnaC08g48990D	black
BnaC08g49120D	black
BnaC08g50050D	black
BnaC09g00910D	black
BnaC09g03150D	black
BnaC09g08130D	black
BnaC09g09890D	black
BnaC09g12140D	black
BnaC09g12310D	black
BnaC09g12890D	black
BnaC09g14910D	black
BnaC09g15100D	black
BnaC09g15130D	black
BnaC09g15180D	black
BnaC09g17190D	black
BnaC09g17880D	black
BnaC09g18060D	black
BnaC09g18140D	black
BnaC09g18280D	black
BnaC09g19560D	black
BnaC09g20300D	black
BnaC09g20370D	black
BnaC09g20450D	black
BnaC09g20660D	black
BnaC09g20830D	black
BnaC09g20910D	black
BnaC09g21010D	black
BnaC09g21890D	black
BnaC09g22280D	black
BnaC09g22550D	black
BnaC09g23120D	black
BnaC09g23130D	black
BnaC09g23820D	black
BnaC09g24140D	black
BnaC09g24190D	black
BnaC09g25860D	black
BnaC09g26330D	black
BnaC09g26480D	black
BnaC09g27350D	black
BnaC09g27720D	black
BnaC09g27740D	black
BnaC09g29550D	black
BnaC09g29780D	black
BnaC09g29790D	black
BnaC09g30220D	black
BnaC09g30230D	black
BnaC09g30290D	black
BnaC09g31540D	black
BnaC09g31740D	black
BnaC09g31780D	black
BnaC09g32240D	black
BnaC09g32740D	black
BnaC09g32950D	black
BnaC09g33620D	black
BnaC09g33640D	black
BnaC09g33980D	black
BnaC09g34010D	black
BnaC09g34210D	black
BnaC09g34350D	black
BnaC09g34740D	black
BnaC09g35690D	black
BnaC09g36390D	black
BnaC09g36600D	black
BnaC09g36670D	black
BnaC09g36760D	black
BnaC09g36990D	black
BnaC09g37000D	black
BnaC09g37010D	black
BnaC09g37250D	black
[truncated: 15,008 more rows]

## Sheet: Suppl Dataset 3
Supplemental Dataset 3. Taxonomic information of high abundant bacterial ASVs (n = 2443) in the rhizosphere at two locations.
Kingdom	Phylum	Class	Order	Family	Genus	Species	Confidence	KF19Q189S_2	KF19Q74S_2	YL113S_1	YL233S_2	YL169S_1	KF19Q113S_3	KF19Q70S_3	KF19Q99S_3	KF19Q217S_2	YL24S_1	YL247S_1	YL215S_2	KF19Q211S_3	YL183S_1	YL40S_1	KF19Q30S_2	KF19Q32S_2	KF19Q125S_1	YL115S_3	KF19Q114S_3	KF19Q67S_1	YL162S_2	YL135S_2	KF19Q15S_1	YL105S_1	YL101S_2	YL29S_1	KF19Q17S_3	KF19Q117S_1	KF19Q68S_1	KF19Q252S_2	YL285S_2	KF19Q182S_3	KF19Q1S_3	KF19Q20S_1	KF19Q205S_3	KF19Q64S_2	KF19Q73S_3	KF19Q91S_3	KF19Q194S_1	YL166S_3	YL261S_3
ASV459	Bacteria	Planctomycetota	Planctomycetes	norank_c__Planctomycetes	norank_o__norank_c__Planctomycetes	norank_f__norank_o__norank_c__Planctomycetes	uncultured_bacterium_g__norank_f__norank_o__norank_c__Planctomycetes	0.999235	15	5	17	20	19	5	0	5	8	0	2	13	3	11	7	7	4	6	18	10	11	24	6	11	10	6	0	0	6	6	17	6	0	2	0	9	12	6	0	7	8
ASV3260	Bacteria	Planctomycetota	OM190	norank_c__OM190	norank_o__norank_c__OM190	norank_f__norank_o__norank_c__OM190	uncultured_bacterium_g__norank_f__norank_o__norank_c__OM190	0.764432	0	0	23	13	18	0	0	0	8	0	7	0	0	6	8	0	10	8	17	4	0	17	0	0	0	0	5	0	0	0	16	15	0	0	0	0	0	0	0	5	0
ASV558	Bacteria	Planctomycetota	OM190	norank_c__OM190	norank_o__norank_c__OM190	norank_f__norank_o__norank_c__OM190	metagenome_g__norank_f__norank_o__norank_c__OM190	0.834471	13	7	0	3	3	0	6	4	6	0	2	0	8	0	0	14	19	9	0	0	20	0	0	0	2	0	0	4	5	12	12	0	7	8	0	15	6	14	0	13	0
ASV3995	Bacteria	Verrucomicrobiota	Verrucomicrobiae	Opitutales	Opitutaceae	Opitutus	uncultured_Verrucomicrobia_bacterium_g__Opitutus	0.83171	0	0	7	0	0	0	27	19	23	0	0	0	23	14	0	23	16	14	0	15	14	0	9	16	7	0	0	14	29	16	11	0	9	0	0	0	0	0	0	11	18
ASV11933	Bacteria	Verrucomicrobiota	Verrucomicrobiae	Opitutales	Opitutaceae	Opitutus	NA	0.808078	0	0	0	0	0	0	0	0	0	0	0	0	0	0	0	0	0	0	0	15	13	0	0	11	0	0	0	7	16	0	0	0	0	0	0	0	12	0	0	0	0
ASV8408	Bacteria	Verrucomicrobiota	Verrucomicrobiae	Opitutales	Opitutaceae	NA	NA	1	0	0	0	0	0	0	0	0	0	0	21	0	23	26	0	0	0	0	0	0	0	0	0	0	0	0	0	12	0	0	0	0	0	0	0	0	0	0	0	0	25
ASV2043	Bacteria	Verrucomicrobiota	Verrucomicrobiae	Opitutales	Opitutaceae	Opitutus	NA	0.788064	0	12	0	0	0	0	0	14	17	0	0	0	0	11	0	0	10	0	15	0	0	0	0	24	0	0	0	0	13	0	22	0	0	0	16	17	12	0	0	0	0
ASV952	Bacteria	Verrucomicrobiota	Verrucomicrobiae	Chthoniobacterales	Chthoniobacteraceae	Chthoniobacter	NA	0.999438	7	18	0	0	0	6	0	23	9	0	0	0	12	0	0	13	17	9	0	15	17	0	2	23	0	0	3	5	0	13	20	0	8	0	9	19	9	28	12	4	0
ASV3455	Bacteria	Verrucomicrobiota	Verrucomicrobiae	Chthoniobacterales	Chthoniobacteraceae	Chthoniobacter	uncultured_bacterium_g__Chthoniobacter	0.782992	0	0	17	25	32	0	0	0	0	14	30	32	0	26	0	0	0	0	19	0	0	23	0	0	20	13	0	0	0	0	0	28	0	0	0	0	0	0	0	0	0
ASV5634	Bacteria	Verrucomicrobiota	Verrucomicrobiae	Chthoniobacterales	Chthoniobacteraceae	Chthoniobacter	uncultured_bacterium_g__Chthoniobacter	0.8562	0	0	0	0	18	0	0	0	0	29	0	19	0	0	0	0	0	0	27	0	0	0	18	0	0	14	0	0	0	0	0	0	0	0	7	0	0	0	0	0	0
ASV622	Bacteria	Verrucomicrobiota	Verrucomicrobiae	Chthoniobacterales	Chthoniobacteraceae	Chthoniobacter	uncultured_bacterium_g__Chthoniobacter	0.842872	12	14	17	0	12	0	0	0	0	0	0	0	0	0	0	0	9	0	0	0	0	0	0	12	20	0	17	0	7	0	0	0	0	0	0	0	0	0	0	0	30
ASV1733	Bacteria	Verrucomicrobiota	Verrucomicrobiae	Chthoniobacterales	Chthoniobacteraceae	Chthoniobacter	uncultured_Verrucomicrobiales_bacterium_g__Chthoniobacter	0.736571	0	22	0	0	0	9	0	9	0	0	0	0	0	0	0	0	5	7	0	15	12	0	0	21	0	0	0	0	0	0	6	0	0	0	9	11	0	17	0	0	0
ASV7428	Bacteria	Verrucomicrobiota	Verrucomicrobiae	Chthoniobacterales	Chthoniobacteraceae	Chthoniobacter	NA	0.999919	0	0	0	0	0	0	0	10	21	0	0	0	15	0	0	0	14	0	0	0	21	0	0	17	0	0	0	24	0	20	12	0	0	14	12	18	7	23	0	0	0
ASV156	Bacteria	Verrucomicrobiota	Verrucomicrobiae	Chthoniobacterales	Chthoniobacteraceae	Chthoniobacter	NA	0.999764	28	12	32	14	31	0	9	14	15	19	14	0	0	10	0	19	16	10	0	13	17	10	12	20	0	21	15	6	11	0	18	12	13	0	0	7	25	34	0	15	18
ASV6442	Bacteria	Verrucomicrobiota	Verrucomicrobiae	Chthoniobacterales	Chthoniobacteraceae	Chthoniobacter	uncultured_bacterium_g__Chthoniobacter	0.798392	0	0	0	0	0	11	0	24	18	0	0	0	0	0	0	0	0	27	0	20	22	0	0	0	0	0	0	0	16	0	0	0	0	0	0	21	27	0	0	0	0
ASV580	Bacteria	Verrucomicrobiota	Verrucomicrobiae	Chthoniobacterales	Chthoniobacteraceae	Chthoniobacter	uncultured_bacterium_g__Chthoniobacter	0.709183	13	24	0	0	0	0	0	5	12	0	0	0	0	0	0	0	0	0	0	0	19	0	0	15	0	0	0	10	0	19	0	0	0	0	0	10	10	18	0	0	0
ASV4705	Bacteria	Verrucomicrobiota	Verrucomicrobiae	Chthoniobacterales	Chthoniobacteraceae	Chthoniobacter	NA	0.999836	0	0	0	21	23	0	0	0	0	0	0	16	0	0	0	0	0	0	11	0	0	22	0	0	9	8	0	11	0	0	0	0	0	0	0	0	0	0	0	0	23
ASV2256	Bacteria	Verrucomicrobiota	Verrucomicrobiae	Chthoniobacterales	Chthoniobacteraceae	Chthoniobacter	NA	0.99972	0	9	0	0	0	0	0	0	0	0	0	0	0	7	0	0	6	0	0	9	27	0	0	0	0	0	0	0	0	0	0	0	0	0	13	0	14	0	0	0	0
ASV2155	Bacteria	Verrucomicrobiota	Verrucomicrobiae	Chthoniobacterales	Chthoniobacteraceae	Chthoniobacter	NA	0.99925	0	10	0	0	0	8	17	15	28	0	0	0	21	0	0	18	13	11	0	8	37	0	0	17	0	0	0	16	18	30	25	0	0	0	0	18	16	18	6	28	0
ASV3321	Bacteria	Verrucomicrobiota	Verrucomicrobiae	Chthoniobacterales	Chthoniobacteraceae	Chthoniobacter	uncultured_bacterium_g__Chthoniobacter	0.737959	0	0	21	0	18	0	0	0	0	0	0	0	0	0	25	0	0	0	20	0	0	0	0	0	14	0	0	0	0	0	0	0	0	0	0	0	0	0	0	0	0
ASV3691	Bacteria	Verrucomicrobiota	Verrucomicrobiae	Chthoniobacterales	Chthoniobacteraceae	Chthoniobacter	uncultured_bacterium_g__Chthoniobacter	0.781326	0	0	12	0	11	0	0	0	0	0	0	0	0	0	0	0	0	0	0	0	0	0	0	0	0	19	0	0	0	0	0	0	0	0	0	0	0	37	0	0	0
ASV663	Bacteria	Verrucomicrobiota	Verrucomicrobiae	Chthoniobacterales	Chthoniobacteraceae	Chthoniobacter	metagenome_g__Chthoniobacter	0.956773	11	5	15	20	22	0	0	0	0	0	0	12	0	13	0	0	0	0	21	0	0	0	8	0	15	18	0	0	13	13	0	27	0	14	8	0	8	12	0	0	14
ASV2332	Bacteria	Verrucomicrobiota	Verrucomicrobiae	Chthoniobacterales	Chthoniobacteraceae	Chthoniobacter	metagenome_g__Chthoniobacter	0.830128	0	7	0	0	13	9	0	0	12	12	0	0	16	0	0	0	21	0	0	16	18	7	0	13	0	0	0	10	0	0	17	0	12	0	0	0	7	9	0	0	0
ASV1827	Bacteria	Verrucomicrobiota	Verrucomicrobiae	Chthoniobacterales	Chthoniobacteraceae	Chthoniobacter	metagenome_g__Chthoniobacter	0.701831	0	18	0	0	0	0	0	8	0	0	0	0	0	0	0	12	0	14	0	0	0	0	0	0	0	0	0	0	0	0	0	0	0	0	0	15	0	23	0	0	0
ASV713	Bacteria	Verrucomicrobiota	Verrucomicrobiae	Chthoniobacterales	Xiphinematobacteraceae	Candidatus_Xiphinematobacter	uncultured_bacterium_g__Candidatus_Xiphinematobacter	0.768196	10	41	0	0	0	14	23	37	43	0	0	0	16	0	0	39	25	39	0	0	54	5	0	24	0	0	0	7	0	36	27	0	5	0	0	11	41	56	7	7	0
ASV11243	Bacteria	Verrucomicrobiota	Verrucomicrobiae	Chthoniobacterales	Xiphinematobacteraceae	Candidatus_Xiphinematobacter	uncultured_bacterium_g__Candidatus_Xiphinematobacter	0.808558	0	0	0	0	0	0	0	0	0	0	0	0	0	0	0	0	0	14	0	18	0	0	0	0	0	0	0	0	23	0	0	0	0	0	0	0	0	33	0	0	0
ASV4629	Bacteria	Verrucomicrobiota	Verrucomicrobiae	Verrucomicrobiales	Rubritaleaceae	Luteolibacter	NA	0.99971	0	0	0	37	10	0	0	0	11	19	0	15	0	12	0	0	0	0	0	0	6	15	0	4	7	20	0	0	0	0	0	24	0	0	0	7	10	0	0	0	16
ASV375	Bacteria	Verrucomicrobiota	Verrucomicrobiae	Verrucomicrobiales	Rubritaleaceae	Luteolibacter	uncultured_soil_bacterium_g__Luteolibacter	0.730959	18	35	0	0	0	10	25	25	23	0	0	0	18	0	0	29	33	21	11	18	23	18	0	12	7	0	0	0	0	27	35	0	20	0	0	38	17	28	11	17	0
ASV7378	Bacteria	Verrucomicrobiota	Verrucomicrobiae	Verrucomicrobiales	Rubritaleaceae	Luteolibacter	NA	0.999989	0	0	0	0	0	0	0	20	0	0	0	0	13	0	0	0	0	0	0	0	22	0	0	16	0	0	0	0	0	17	0	0	0	0	0	16	0	27	0	0	0
ASV1739	Bacteria	Verrucomicrobiota	Verrucomicrobiae	Verrucomicrobiales	Rubritaleaceae	Luteolibacter	NA	0.999994	0	22	0	0	14	0	0	0	0	0	0	0	0	0	0	0	0	0	0	0	0	0	0	0	0	8	0	0	0	0	0	0	0	0	0	0	10	22	0	0	0
ASV251	Bacteria	Verrucomicrobiota	Verrucomicrobiae	Verrucomicrobiales	Rubritaleaceae	Luteolibacter	NA	0.999924	23	0	0	0	15	0	0	0	0	0	0	5	22	0	0	0	17	0	0	0	0	0	0	0	0	0	0	0	0	0	0	0	0	0	0	14	0	0	0	0	0
ASV7638	Bacteria	Verrucomicrobiota	Verrucomicrobiae	Verrucomicrobiales	Rubritaleaceae	Luteolibacter	Luteolibacter_flavescens	0.809016	0	0	0	0	0	0	0	0	24	0	0	0	0	0	0	0	14	0	0	0	0	0	0	0	0	0	0	10	0	0	25	0	0	0	0	0	0	15	0	0	0
ASV6513	Bacteria	Verrucomicrobiota	Verrucomicrobiae	Verrucomicrobiales	Rubritaleaceae	Luteolibacter	NA	0.999977	0	0	0	0	0	7	0	22	0	0	0	0	0	0	0	0	0	0	0	0	14	0	0	21	0	0	0	0	0	0	0	0	0	0	0	0	0	0	0	0	0
ASV7668	Bacteria	Verrucomicrobiota	Verrucomicrobiae	Verrucomicrobiales	Verrucomicrobiaceae	Roseimicrobium	metagenome_g__Roseimicrobium	0.771266	0	0	0	0	0	0	0	0	17	0	0	0	0	0	0	11	26	0	8	0	21	0	0	0	0	0	0	8	0	0	15	0	0	5	11	0	0	11	0	10	0
ASV242	Bacteria	Verrucomicrobiota	Verrucomicrobiae	Verrucomicrobiales	Verrucomicrobiaceae	Roseimicrobium	metagenome_g__Roseimicrobium	0.838302	23	39	0	15	21	13	14	0	0	16	5	5	7	11	0	0	0	18	0	23	38	10	11	22	11	7	0	0	16	37	0	6	14	0	0	28	28	20	0	0	13
ASV7455	Bacteria	Verrucomicrobiota	Verrucomicrobiae	Verrucomicrobiales	Verrucomicrobiaceae	Roseimicrobium	Roseimicrobium_gellanilyticum	0.982171	0	0	0	0	0	0	0	8	0	0	0	0	0	0	0	0	0	12	0	0	22	0	0	0	0	0	0	9	0	8	0	0	0	0	0	0	0	16	0	0	0
ASV7399	Bacteria	Verrucomicrobiota	Verrucomicrobiae	Verrucomicrobiales	Verrucomicrobiaceae	Verrucomicrobium	Verrucomicrobium_spinosum_DSM_4136__JCM_18804	0.807326	0	0	0	0	0	0	0	15	0	3	0	0	0	0	5	0	0	0	8	15	0	0	8	9	0	5	0	0	0	9	13	0	0	0	0	0	11	0	15	0	6
ASV2020	Bacteria	Verrucomicrobiota	Verrucomicrobiae	Verrucomicrobiales	Verrucomicrobiaceae	norank_f__Verrucomicrobiaceae	uncultured_Verrucomicrobia_bacterium_g__norank_f__Verrucomicrobiaceae	0.745007	0	12	18	0	0	0	0	10	20	0	5	0	0	14	0	0	9	10	10	13	0	0	0	14	0	0	0	0	0	0	11	0	0	11	0	11	0	18	0	0	0
ASV5662	Bacteria	Verrucomicrobiota	Verrucomicrobiae	Pedosphaerales	Pedosphaeraceae	norank_f__Pedosphaeraceae	NA	0.999768	0	0	0	0	16	0	0	0	0	0	0	0	27	11	0	42	13	0	0	0	19	0	0	31	9	0	0	0	0	0	0	0	0	0	0	0	30	0	0	0	0
ASV470	Bacteria	Verrucomicrobiota	Verrucomicrobiae	Pedosphaerales	Pedosphaeraceae	norank_f__Pedosphaeraceae	uncultured_Desulfovibrio_sp._g__norank	0.938499	15	0	0	0	0	0	0	0	25	0	0	0	0	0	0	0	28	0	0	0	28	0	6	0	0	0	0	0	0	0	0	0	0	0	0	0	0	0	0	0	0
ASV1593	Bacteria	Verrucomicrobiota	Verrucomicrobiae	Pedosphaerales	Pedosphaeraceae	norank_f__Pedosphaeraceae	uncultured_Desulfovibrio_sp._g__norank	0.865388	0	43	0	0	0	11	14	30	0	0	0	7	0	0	0	0	0	29	19	29	0	6	0	0	0	0	0	0	0	22	26	0	0	0	0	19	0	38	0	17	8
ASV787	Bacteria	Verrucomicrobiota	Verrucomicrobiae	Pedosphaerales	Pedosphaeraceae	norank_f__Pedosphaeraceae	NA	0.943204	9	22	0	0	0	0	6	0	15	0	0	0	7	7	0	7	15	0	0	11	15	0	0	16	0	0	0	13	6	18	8	0	8	0	0	11	18	14	0	7	8
ASV3218	Bacteria	Verrucomicrobiota	Verrucomicrobiae	Pedosphaerales	Pedosphaeraceae	NA	NA	1	0	0	25	10	9	0	0	0	0	0	0	0	0	9	13	0	0	0	30	4	0	12	14	9	17	10	0	0	0	0	0	0	0	0	0	8	0	0	0	0	13
ASV3489	Bacteria	Verrucomicrobiota	Verrucomicrobiae	Pedosphaerales	Pedosphaeraceae	NA	NA	1	0	0	16	14	14	0	0	0	0	7	0	16	0	0	0	0	0	0	0	0	0	17	0	0	14	11	0	0	0	0	0	13	0	0	0	0	0	0	0	0	12
ASV1752	Bacteria	Verrucomicrobiota	Verrucomicrobiae	Pedosphaerales	Pedosphaeraceae	norank_f__Pedosphaeraceae	NA	0.999997	0	21	0	0	0	0	0	0	5	0	0	0	26	0	0	0	0	10	0	0	15	0	0	31	0	0	0	22	0	0	0	0	0	0	0	14	12	0	0	0	0
ASV3471	Bacteria	Verrucomicrobiota	Verrucomicrobiae	Pedosphaerales	Pedosphaeraceae	norank_f__Pedosphaeraceae	uncultured_soil_bacterium_g__norank_f__Pedosphaeraceae	0.779383	0	0	16	30	29	6	0	0	15	13	10	16	0	0	0	12	0	10	0	9	19	17	26	0	23	10	0	0	14	13	0	22	14	0	0	17	10	0	5	0	63
ASV518	Bacteria	Verrucomicrobiota	Verrucomicrobiae	Pedosphaerales	Pedosphaeraceae	norank_f__Pedosphaeraceae	NA	0.999992	14	0	0	0	0	0	0	16	7	0	0	0	0	0	0	10	20	16	0	19	15	0	0	0	0	0	0	0	0	20	23	0	0	0	0	0	0	0	0	0	0
ASV1720	Bacteria	Nitrospirota	Nitrospiria	Nitrospirales	Nitrospiraceae	Nitrospira	NA	0.999903	0	23	0	0	0	11	46	5	12	0	0	0	8	0	0	0	0	9	0	0	20	0	0	0	0	0	0	0	12	16	0	0	0	0	0	0	36	10	12	0	0
ASV1610	Bacteria	Nitrospirota	Nitrospiria	Nitrospirales	Nitrospiraceae	Nitrospira	uncultured_organism_g__Nitrospira	0.792329	0	37	47	56	67	27	37	24	0	36	14	43	25	88	26	39	43	31	73	47	28	51	81	0	40	55	26	0	59	39	29	21	23	0	0	0	24	29	0	31	66
ASV128	Bacteria	Nitrospirota	Nitrospiria	Nitrospirales	Nitrospiraceae	Nitrospira	uncultured_organism_g__Nitrospira	0.812661	30	27	0	0	0	32	47	14	40	0	0	0	28	0	0	70	42	23	11	24	26	0	0	27	0	0	0	30	30	28	32	0	17	30	23	21	28	24	27	43	0
ASV587	Bacteria	Nitrospirota	Nitrospiria	Nitrospirales	Nitrospiraceae	Nitrospira	uncultured_organism_g__Nitrospira	0.800052	13	10	0	0	0	13	0	0	0	0	0	0	0	0	0	20	0	12	0	0	0	0	0	0	0	0	0	0	35	11	0	0	0	0	0	0	12	12	0	0	0
ASV312	Bacteria	Nitrospirota	Nitrospiria	Nitrospirales	Nitrospiraceae	Nitrospira	NA	0.999999	20	38	149	119	224	42	59	38	41	110	60	149	42	288	101	56	60	29	212	52	28	141	152	53	101	115	133	35	72	43	42	64	28	44	67	42	47	50	37	54	225
ASV1582	Bacteria	Nitrospirota	Nitrospiria	Nitrospirales	Nitrospiraceae	Nitrospira	NA	0.999994	0	51	0	0	0	42	108	31	54	0	0	0	28	0	0	39	29	47	0	42	58	0	0	17	0	0	0	0	51	66	26	0	24	43	0	0	75	63	20	26	0
ASV431	Bacteria	Nitrospirota	Nitrospiria	Nitrospirales	Nitrospiraceae	Nitrospira	uncultured_soil_bacterium_g__Nitrospira	0.733852	17	0	0	0	0	0	0	0	0	0	0	0	0	0	0	0	0	0	0	0	0	0	0	12	0	0	0	20	16	0	0	0	0	20	0	0	0	0	14	0	0
ASV1084	Bacteria	Nitrospirota	Nitrospiria	Nitrospirales	Nitrospiraceae	Nitrospira	NA	1	6	21	0	0	0	8	37	8	0	0	0	0	32	0	0	14	15	15	0	14	29	0	0	9	0	0	0	0	23	20	3	0	10	0	0	7	26	9	12	4	0
ASV374	Bacteria	Nitrospirota	Nitrospiria	Nitrospirales	Nitrospiraceae	Nitrospira	NA	1	18	39	0	0	0	36	63	22	39	0	0	0	36	0	0	42	61	41	0	32	41	0	0	18	0	7	0	24	46	42	42	0	27	46	11	16	43	57	24	29	0
ASV5683	Bacteria	Nitrospirota	Nitrospiria	Nitrospirales	Nitrospiraceae	Nitrospira	Nitrospira_sp.	0.924899	0	0	0	0	15	0	0	0	0	0	0	0	0	13	0	0	0	0	13	0	0	0	0	0	0	0	0	0	0	0	0	0	0	0	0	0	0	0	0	0	0
ASV3475	Bacteria	Nitrospirota	Nitrospiria	Nitrospirales	Nitrospiraceae	Nitrospira	Nitrospira_sp.	0.889785	0	0	16	20	28	0	0	0	0	22	0	0	0	31	13	9	0	0	0	0	0	16	25	0	20	0	18	0	0	0	0	6	0	0	0	0	5	0	0	0	36
ASV3435	Bacteria	Nitrospirota	Nitrospiria	Nitrospirales	Nitrospiraceae	Nitrospira	NA	0.999998	0	0	17	17	0	0	0	0	0	0	6	23	0	25	5	0	0	0	18	0	0	0	0	0	11	10	0	0	0	0	0	13	0	0	0	0	0	0	0	0	23
ASV3459	Bacteria	Gemmatimonadota	S0134_terrestrial_group	norank_c__S0134_terrestrial_group	norank_o__norank_c__S0134_terrestrial_group	norank_f__norank_o__norank_c__S0134_terrestrial_group	uncultured_bacterium_g__norank_f__norank_o__norank_c__S0134_terrestrial_group	0.904906	0	0	16	11	19	0	0	0	0	0	0	21	0	24	6	0	0	0	9	0	0	0	12	0	7	10	0	12	0	0	0	10	0	0	0	0	0	3	0	0	9
ASV1128	Bacteria	Gemmatimonadota	S0134_terrestrial_group	norank_c__S0134_terrestrial_group	norank_o__norank_c__S0134_terrestrial_group	norank_f__norank_o__norank_c__S0134_terrestrial_group	uncultured_Gemmatimonadetes_bacterium_g__norank_f__norank_o__norank_c__S0134_terrestrial_group	0.94572	5	14	0	0	0	8	25	4	5	0	0	0	7	0	0	18	8	18	0	15	17	0	0	13	0	0	0	5	28	15	7	0	8	14	0	0	8	10	12	0	0
ASV1252	Bacteria	Gemmatimonadota	S0134_terrestrial_group	norank_c__S0134_terrestrial_group	norank_o__norank_c__S0134_terrestrial_group	norank_f__norank_o__norank_c__S0134_terrestrial_group	uncultured_bacterium_g__norank_f__norank_o__norank_c__S0134_terrestrial_group	0.783224	4	17	20	21	17	9	28	4	12	10	3	11	7	58	8	14	9	9	28	6	5	6	19	13	13	5	11	10	12	12	6	7	9	11	0	4	13	7	9	13	16
ASV3170	Bacteria	Gemmatimonadota	Gemmatimonadetes	Gemmatimonadales	Gemmatimonadaceae	norank_f__Gemmatimonadaceae	Gemmatimonadetes_bacterium_LX87	0.989544	0	0	29	25	37	0	0	0	0	13	6	29	0	38	0	0	0	0	45	0	0	23	30	0	19	12	10	0	0	0	0	26	0	0	0	0	0	0	0	0	32
ASV3276	Bacteria	Gemmatimonadota	Gemmatimonadetes	Gemmatimonadales	Gemmatimonadaceae	norank_f__Gemmatimonadaceae	NA	0.994303	0	0	22	6	13	0	0	0	0	0	0	14	0	13	7	0	0	0	19	0	0	0	17	0	23	15	0	0	0	0	0	9	0	0	0	0	0	0	0	0	10
ASV3323	Bacteria	Gemmatimonadota	Gemmatimonadetes	Gemmatimonadales	Gemmatimonadaceae	norank_f__Gemmatimonadaceae	NA	0.996817	0	0	21	20	27	0	0	0	0	12	8	19	0	21	17	0	0	0	18	0	0	13	20	0	21	15	19	0	0	0	0	13	0	0	0	0	0	0	0	0	27
ASV2700	Bacteria	Gemmatimonadota	Gemmatimonadetes	Gemmatimonadales	Gemmatimonadaceae	norank_f__Gemmatimonadaceae	NA	0.999849	0	4	41	48	24	9	9	0	0	15	6	23	0	43	14	6	0	5	53	0	11	15	45	10	32	15	16	0	5	9	6	35	5	0	10	0	5	0	0	0	27
ASV3083	Bacteria	Gemmatimonadota	Gemmatimonadetes	Gemmatimonadales	Gemmatimonadaceae	norank_f__Gemmatimonadaceae	NA	0.999601	0	0	37	19	0	0	0	0	0	14	0	17	0	31	0	0	0	0	31	0	0	19	40	0	28	19	14	0	0	0	0	16	0	0	0	0	0	0	0	0	20
ASV3209	Bacteria	Gemmatimonadota	Gemmatimonadetes	Gemmatimonadales	Gemmatimonadaceae	norank_f__Gemmatimonadaceae	uncultured_Gemmatimonadetes_bacterium_g__norank_f__Gemmatimonadaceae	0.706272	0	0	26	24	19	0	0	0	0	0	13	33	0	19	13	0	0	0	23	0	0	14	17	0	18	13	0	0	0	0	0	32	0	0	0	0	0	8	0	0	27
ASV7402	Bacteria	Gemmatimonadota	Gemmatimonadetes	Gemmatimonadales	Gemmatimonadaceae	norank_f__Gemmatimonadaceae	NA	0.970291	0	0	0	0	0	0	0	14	0	0	0	0	0	0	0	17	15	15	0	0	12	0	0	0	0	0	0	13	0	12	19	12	15	0	4	0	20	0	10	0	10
ASV2880	Bacteria	Gemmatimonadota	Gemmatimonadetes	Gemmatimonadales	Gemmatimonadaceae	Gemmatimonas	NA	0.85692	0	3	28	27	37	3	0	0	0	16	13	41	0	33	18	0	0	0	21	3	0	19	27	0	40	26	35	8	0	0	0	60	0	0	0	0	15	10	0	0	59
ASV6640	Bacteria	Gemmatimonadota	Gemmatimonadetes	Gemmatimonadales	Gemmatimonadaceae	norank_f__Gemmatimonadaceae	NA	0.921274	0	0	0	0	0	0	30	0	0	0	0	0	0	0	29	0	0	0	0	19	31	0	0	0	0	0	0	0	0	24	0	0	20	23	0	0	0	0	0	0	0
ASV3068	Bacteria	Gemmatimonadota	Gemmatimonadetes	Gemmatimonadales	Gemmatimonadaceae	norank_f__Gemmatimonadaceae	NA	0.936	0	0	39	45	27	0	0	0	0	25	11	38	0	81	0	0	0	0	51	0	0	24	24	0	21	32	20	0	0	0	0	55	0	0	0	0	0	0	0	0	32
ASV3078	Bacteria	Gemmatimonadota	Gemmatimonadetes	Gemmatimonadales	Gemmatimonadaceae	norank_f__Gemmatimonadaceae	NA	0.904011	0	0	38	30	24	0	0	0	0	0	0	27	0	38	0	0	0	0	28	0	0	11	27	0	30	17	9	0	0	0	0	24	0	0	0	12	0	0	0	0	17
ASV6693	Bacteria	Gemmatimonadota	Gemmatimonadetes	Gemmatimonadales	Gemmatimonadaceae	norank_f__Gemmatimonadaceae	NA	0.936553	0	0	0	0	0	0	19	12	32	0	0	0	0	0	0	40	0	24	0	0	0	0	0	0	0	0	0	0	0	0	31	0	0	0	0	0	33	0	0	0	0
ASV6390	Bacteria	Gemmatimonadota	Gemmatimonadetes	Gemmatimonadales	Gemmatimonadaceae	norank_f__Gemmatimonadaceae	NA	0.941689	0	0	0	0	0	19	0	0	0	0	0	0	0	0	0	25	0	0	0	24	0	0	0	0	0	0	0	0	35	0	0	0	0	0	0	0	0	24	18	0	18
ASV9115	Bacteria	Gemmatimonadota	Gemmatimonadetes	Gemmatimonadales	Gemmatimonadaceae	norank_f__Gemmatimonadaceae	NA	0.934359	0	0	0	0	0	0	0	0	0	0	0	0	23	0	0	0	22	0	0	0	0	0	0	30	0	0	0	29	0	0	0	0	0	0	12	0	0	0	0	23	0
ASV468	Bacteria	Gemmatimonadota	Gemmatimonadetes	Gemmatimonadales	Gemmatimonadaceae	norank_f__Gemmatimonadaceae	NA	0.74359	15	15	0	0	0	15	30	11	10	0	0	0	17	0	0	15	8	12	0	14	0	0	8	10	0	0	0	0	26	18	19	0	7	21	0	0	8	15	11	5	0
ASV601	Bacteria	Gemmatimonadota	Gemmatimonadetes	Gemmatimonadales	Gemmatimonadaceae	NA	NA	0.99997	12	24	0	0	0	23	29	15	12	0	0	0	21	0	0	38	26	24	0	40	13	0	0	27	0	0	0	14	47	10	10	0	21	9	11	8	22	23	16	16	0
ASV3061	Bacteria	Gemmatimonadota	Gemmatimonadetes	Gemmatimonadales	Gemmatimonadaceae	NA	NA	0.999976	0	0	41	30	27	0	0	0	0	21	6	37	0	35	0	7	0	0	33	0	0	25	16	16	20	13	14	19	0	0	6	28	0	8	9	0	0	9	13	0	48
ASV4708	Bacteria	Gemmatimonadota	Gemmatimonadetes	Gemmatimonadales	Gemmatimonadaceae	NA	NA	0.999976	0	0	0	21	18	0	10	0	0	0	0	19	0	32	18	0	0	0	0	0	0	22	14	0	9	0	19	0	15	0	0	32	0	0	0	0	14	0	0	0	29
ASV3128	Bacteria	Gemmatimonadota	Gemmatimonadetes	Gemmatimonadales	Gemmatimonadaceae	NA	NA	0.999998	0	0	32	18	13	0	0	2	0	13	11	27	0	27	5	0	0	0	16	2	0	19	14	2	19	18	20	0	0	0	0	39	0	0	0	2	0	2	0	0	36
ASV3168	Bacteria	Gemmatimonadota	Gemmatimonadetes	Gemmatimonadales	Gemmatimonadaceae	NA	NA	0.99999	0	0	29	30	31	0	0	0	0	9	8	50	0	27	17	0	0	0	21	0	0	30	35	0	31	24	29	0	0	0	0	54	0	0	0	0	0	0	0	0	45
ASV3222	Bacteria	Gemmatimonadota	Gemmatimonadetes	Gemmatimonadales	Gemmatimonadaceae	norank_f__Gemmatimonadaceae	NA	0.798064	0	0	25	10	12	0	0	0	0	9	5	8	0	33	5	0	0	0	22	0	0	25	13	0	0	0	16	0	0	0	0	12	0	0	0	0	0	0	0	0	12
ASV779	Bacteria	Gemmatimonadota	Gemmatimonadetes	Gemmatimonadales	Gemmatimonadaceae	norank_f__Gemmatimonadaceae	NA	0.928387	9	18	78	95	56	13	38	10	8	33	0	109	13	138	47	25	21	10	54	23	19	61	43	17	63	44	50	12	29	14	15	103	11	6	13	10	16	14	19	12	75
ASV3036	Bacteria	Gemmatimonadota	Gemmatimonadetes	Gemmatimonadales	Gemmatimonadaceae	norank_f__Gemmatimonadaceae	NA	0.943859	0	0	48	41	34	0	0	0	0	0	21	49	0	56	0	0	0	0	34	0	0	32	30	0	29	17	23	0	0	0	0	61	0	0	0	0	0	0	0	0	43
ASV3406	Bacteria	Gemmatimonadota	Gemmatimonadetes	Gemmatimonadales	Gemmatimonadaceae	norank_f__Gemmatimonadaceae	NA	0.891445	0	0	18	27	20	0	0	0	0	0	0	31	0	25	0	0	0	0	18	0	0	0	19	0	0	15	0	0	0	0	0	18	0	0	0	0	0	0	0	0	30
ASV8144	Bacteria	Gemmatimonadota	Gemmatimonadetes	Gemmatimonadales	Gemmatimonadaceae	norank_f__Gemmatimonadaceae	NA	0.794541	0	0	0	0	0	0	0	0	0	12	0	0	0	42	0	0	0	0	0	0	0	22	20	0	0	0	17	9	0	0	0	40	0	0	0	0	0	0	0	0	0
ASV3017	Bacteria	Gemmatimonadota	Gemmatimonadetes	Gemmatimonadales	Gemmatimonadaceae	norank_f__Gemmatimonadaceae	NA	0.818283	0	0	55	38	37	0	0	0	0	16	12	93	0	89	7	0	0	0	33	0	0	41	37	0	54	25	22	0	0	0	0	83	0	0	0	0	0	0	0	0	60
ASV3319	Bacteria	Gemmatimonadota	Gemmatimonadetes	Gemmatimonadales	Gemmatimonadaceae	norank_f__Gemmatimonadaceae	NA	0.774723	0	0	21	30	17	0	0	0	0	0	0	36	0	0	0	0	0	0	20	0	0	0	0	7	26	16	0	0	0	0	7	0	0	14	0	0	0	0	0	0	24
ASV3217	Bacteria	Gemmatimonadota	Gemmatimonadetes	Gemmatimonadales	Gemmatimonadaceae	Roseisolibacter	uncultured_bacterium_g__Roseisolibacter	0.744097	0	0	25	9	11	0	0	0	0	4	6	10	0	24	3	0	0	0	21	0	0	13	9	0	12	7	7	0	0	0	0	14	0	0	0	0	0	0	0	0	20
ASV3240	Bacteria	Gemmatimonadota	Gemmatimonadetes	Gemmatimonadales	Gemmatimonadaceae	Gemmatimonas	NA	0.99975	0	0	24	0	26	0	0	0	0	0	10	22	8	20	0	0	0	0	13	0	0	14	19	0	14	11	0	0	0	0	0	0	0	0	0	0	0	0	0	0	17
ASV3307	Bacteria	Gemmatimonadota	Gemmatimonadetes	Gemmatimonadales	Gemmatimonadaceae	Gemmatimonas	NA	0.999792	0	0	21	13	19	0	0	0	0	12	0	6	0	24	11	0	0	0	22	0	0	12	12	0	5	5	16	0	0	0	0	9	0	0	0	0	0	0	0	0	15
ASV1256	Bacteria	Gemmatimonadota	Gemmatimonadetes	Gemmatimonadales	Gemmatimonadaceae	Gemmatimonas	NA	0.999657	4	7	22	44	37	4	10	0	0	16	19	61	0	34	13	7	2	0	14	7	7	20	18	0	16	24	22	9	7	0	8	40	7	0	8	5	7	8	0	6	33
ASV597	Bacteria	Gemmatimonadota	Gemmatimonadetes	Gemmatimonadales	Gemmatimonadaceae	norank_f__Gemmatimonadaceae	NA	0.999457	12	6	0	0	0	7	9	4	9	0	0	0	22	0	0	23	17	15	0	5	7	0	0	18	0	0	0	11	21	5	9	0	7	0	4	4	14	5	11	9	0
ASV924	Bacteria	Gemmatimonadota	Gemmatimonadetes	Gemmatimonadales	Gemmatimonadaceae	norank_f__Gemmatimonadaceae	uncultured_proteobacterium_g__norank_f__Gemmatimonadaceae	0.944981	8	24	75	66	119	13	39	0	25	68	35	62	28	141	67	40	13	0	114	0	27	86	104	40	39	37	86	39	0	32	26	39	6	16	38	16	23	21	0	18	112
ASV2246	Bacteria	Gemmatimonadota	Gemmatimonadetes	Gemmatimonadales	Gemmatimonadaceae	norank_f__Gemmatimonadaceae	uncultured_Alphaproteobacteria_bacterium_g__norank_f__Gemmatimonadaceae	0.756316	0	9	0	6	0	18	14	0	0	15	0	8	0	0	8	0	0	0	0	8	12	7	0	0	0	0	21	0	0	0	0	0	6	0	0	11	0	8	0	0	13
ASV567	Bacteria	Gemmatimonadota	Gemmatimonadetes	Gemmatimonadales	Gemmatimonadaceae	norank_f__Gemmatimonadaceae	uncultured_Alphaproteobacteria_bacterium_g__norank_f__Gemmatimonadaceae	0.937375	13	17	22	38	25	0	28	15	23	22	14	101	12	45	19	31	17	18	23	11	24	38	36	14	33	36	53	20	24	23	23	39	9	40	13	0	23	13	16	9	52
ASV810	Bacteria	Gemmatimonadota	Gemmatimonadetes	Gemmatimonadales	Gemmatimonadaceae	norank_f__Gemmatimonadaceae	uncultured_Nitrospira_sp._g__norank_f__Gemmatimonadaceae	0.995302	9	16	0	0	0	0	21	6	18	0	0	0	15	0	0	27	20	9	0	5	17	0	0	4	0	0	0	0	0	23	11	0	0	4	0	7	15	10	8	9	0
ASV2008	Bacteria	Gemmatimonadota	Gemmatimonadetes	Gemmatimonadales	Gemmatimonadaceae	norank_f__Gemmatimonadaceae	uncultured_Gemmatimonadales_bacterium_g__norank_f__Gemmatimonadaceae	0.745845	0	13	25	42	19	0	33	0	0	10	10	17	18	29	8	0	11	8	19	6	18	9	29	17	18	12	14	0	23	12	13	24	13	9	0	10	29	0	6	0	18
ASV1001	Bacteria	Gemmatimonadota	Gemmatimonadetes	Gemmatimonadales	Gemmatimonadaceae	norank_f__Gemmatimonadaceae	uncultured_Gemmatimonadales_bacterium_g__norank_f__Gemmatimonadaceae	0.762183	7	0	0	0	0	0	0	0	13	0	0	0	0	0	0	10	0	0	0	0	0	0	0	0	0	0	0	18	0	0	0	0	0	0	0	0	0	0	0	14	0
ASV550	Bacteria	Gemmatimonadota	Gemmatimonadetes	Gemmatimonadales	Gemmatimonadaceae	norank_f__Gemmatimonadaceae	NA	0.999998	14	22	0	0	0	18	29	0	19	0	0	0	13	0	0	22	24	17	0	12	26	0	0	5	0	0	0	0	26	25	15	0	11	17	0	8	27	14	12	9	0
ASV3472	Bacteria	Gemmatimonadota	Gemmatimonadetes	Gemmatimonadales	Gemmatimonadaceae	norank_f__Gemmatimonadaceae	NA	0.99999	0	0	16	21	43	0	0	0	0	12	11	17	0	50	9	0	16	0	16	27	0	26	40	0	6	11	13	0	0	0	0	0	0	0	0	0	0	0	0	0	29
ASV630	Bacteria	Gemmatimonadota	Gemmatimonadetes	Gemmatimonadales	Gemmatimonadaceae	norank_f__Gemmatimonadaceae	NA	0.999989	12	25	0	0	0	0	36	0	25	0	0	0	26	0	0	0	0	22	0	0	31	0	0	23	0	0	0	10	40	29	20	0	21	0	0	8	26	24	34	15	0
ASV2211	Bacteria	Gemmatimonadota	Gemmatimonadetes	Gemmatimonadales	Gemmatimonadaceae	norank_f__Gemmatimonadaceae	NA	0.999999	0	9	0	0	0	17	17	32	21	0	0	0	0	0	0	0	0	13	0	18	19	0	0	0	0	0	0	11	20	19	15	0	0	9	0	0	16	10	21	18	0
ASV1648	Bacteria	Gemmatimonadota	Gemmatimonadetes	Gemmatimonadales	Gemmatimonadaceae	norank_f__Gemmatimonadaceae	NA	0.999999	0	30	29	66	57	0	32	0	0	49	27	81	46	94	59	36	0	0	42	0	40	78	0	30	49	47	63	0	0	44	0	0	0	24	0	0	40	41	20	0	76
ASV355	Bacteria	Gemmatimonadota	Gemmatimonadetes	Gemmatimonadales	Gemmatimonadaceae	norank_f__Gemmatimonadaceae	NA	0.999998	19	19	0	40	0	34	31	23	29	0	0	0	0	0	0	18	39	21	0	27	25	0	49	0	0	0	0	0	37	0	30	0	23	19	0	20	0	27	17	13	0
ASV3596	Bacteria	Gemmatimonadota	Gemmatimonadetes	Gemmatimonadales	Gemmatimonadaceae	norank_f__Gemmatimonadaceae	NA	0.999997	0	0	14	0	20	0	0	0	0	0	0	14	0	27	0	0	0	0	25	0	0	0	30	0	0	0	0	0	0	0	0	31	0	0	0	0	0	0	0	0	21
ASV1926	Bacteria	Gemmatimonadota	Gemmatimonadetes	Gemmatimonadales	Gemmatimonadaceae	norank_f__Gemmatimonadaceae	NA	0.999999	0	15	57	0	55	20	15	10	0	0	0	81	0	69	0	16	0	18	0	18	11	64	0	14	24	50	37	18	30	12	14	0	13	15	18	11	30	20	14	8	54
ASV8393	Bacteria	Gemmatimonadota	Gemmatimonadetes	Gemmatimonadales	Gemmatimonadaceae	norank_f__Gemmatimonadaceae	NA	1	0	0	0	0	0	0	0	0	0	0	40	0	0	0	0	0	0	0	0	0	0	0	0	0	0	0	0	0	0	0	0	35	0	0	0	0	0	0	0	0	0
ASV3232	Bacteria	Gemmatimonadota	Gemmatimonadetes	Gemmatimonadales	Gemmatimonadaceae	norank_f__Gemmatimonadaceae	NA	0.999997	0	0	25	36	82	0	0	0	0	47	13	49	0	77	34	0	0	0	22	0	0	54	40	0	18	19	32	0	0	0	0	28	0	0	0	0	0	0	0	0	94
ASV5541	Bacteria	Gemmatimonadota	Gemmatimonadetes	Gemmatimonadales	Gemmatimonadaceae	norank_f__Gemmatimonadaceae	NA	0.999999	0	0	0	0	45	0	0	0	0	50	0	33	0	66	35	0	0	0	38	0	0	33	63	0	19	0	31	0	0	0	0	26	0	0	0	0	0	0	0	0	0
ASV4695	Bacteria	Gemmatimonadota	Gemmatimonadetes	Gemmatimonadales	Gemmatimonadaceae	norank_f__Gemmatimonadaceae	NA	0.999999	0	0	0	22	0	0	0	0	0	0	0	0	0	0	0	0	0	0	0	0	0	0	0	0	0	0	27	0	0	0	0	0	0	0	0	0	0	0	0	0	45
ASV701	Bacteria	Gemmatimonadota	Gemmatimonadetes	Gemmatimonadales	Gemmatimonadaceae	norank_f__Gemmatimonadaceae	NA	0.999997	11	25	11	0	14	22	48	18	23	0	10	30	13	17	9	36	28	23	17	24	26	23	22	14	0	7	0	0	46	17	24	0	21	37	26	0	20	26	31	20	13
ASV437	Bacteria	Gemmatimonadota	Gemmatimonadetes	Gemmatimonadales	Gemmatimonadaceae	norank_f__Gemmatimonadaceae	NA	0.999999	16	0	0	0	0	27	51	28	0	0	0	0	0	0	0	0	27	24	62	29	37	85	0	0	0	37	0	31	47	0	0	39	18	25	0	16	34	23	16	0	0
ASV961	Bacteria	Gemmatimonadota	Gemmatimonadetes	Gemmatimonadales	Gemmatimonadaceae	norank_f__Gemmatimonadaceae	metagenome_g__norank_f__Gemmatimonadaceae	0.93515	7	17	6	6	3	5	20	8	6	0	2	5	12	8	0	20	9	13	7	11	13	8	6	5	4	3	6	8	13	13	0	13	0	12	3	4	12	7	0	0	5
ASV1221	Bacteria	Gemmatimonadota	Gemmatimonadetes	Gemmatimonadales	Gemmatimonadaceae	norank_f__Gemmatimonadaceae	metagenome_g__norank_f__Gemmatimonadaceae	0.868604	5	8	0	0	0	0	0	5	9	0	0	0	0	0	0	0	0	0	0	0	13	0	0	0	0	0	0	0	0	26	16	0	0	10	0	0	10	7	5	0	0
ASV2184	Bacteria	Gemmatimonadota	Gemmatimonadetes	Gemmatimonadales	Gemmatimonadaceae	norank_f__Gemmatimonadaceae	uncultured_Alphaproteobacteria_bacterium_g__norank_f__Gemmatimonadaceae	0.998367	0	9	0	0	0	7	16	5	15	0	0	0	6	4	0	26	15	11	2	13	18	0	0	3	0	0	0	6	10	18	19	0	7	17	0	7	15	25	9	10	2
ASV6487	Bacteria	Gemmatimonadota	Gemmatimonadetes	Gemmatimonadales	Gemmatimonadaceae	norank_f__Gemmatimonadaceae	NA	0.999848	0	0	0	0	0	8	18	12	0	0	0	0	13	0	0	0	0	0	0	0	0	0	0	0	0	0	0	0	15	0	0	0	0	0	0	0	23	0	0	0	0
ASV1637	Bacteria	Gemmatimonadota	Gemmatimonadetes	Gemmatimonadales	Gemmatimonadaceae	norank_f__Gemmatimonadaceae	NA	0.999551	0	31	0	0	0	0	57	0	13	0	0	0	0	0	0	5	9	15	0	16	29	0	0	0	0	0	0	0	0	35	0	0	0	0	0	0	46	22	11	0	0
ASV485	Bacteria	Acidobacteriota	Subgroup_5	norank_c__Subgroup_5	norank_o__norank_c__Subgroup_5	norank_f__norank_o__norank_c__Subgroup_5	uncultured_Acidobacteriales_bacterium_g__norank_f__norank_o__norank_c__Subgroup_5	0.751296	15	7	0	0	0	0	0	0	11	0	0	0	0	0	0	0	0	0	0	18	13	0	0	0	0	0	0	0	0	0	0	0	0	0	0	0	0	12	0	0	0
ASV9130	Bacteria	Acidobacteriota	Subgroup_5	norank_c__Subgroup_5	norank_o__norank_c__Subgroup_5	norank_f__norank_o__norank_c__Subgroup_5	NA	1	0	0	0	0	0	0	0	0	0	0	0	0	19	0	0	0	0	0	0	0	0	0	0	0	0	0	0	0	0	0	0	0	0	0	0	0	0	0	0	0	0
ASV1750	Bacteria	Acidobacteriota	Subgroup_11	norank_c__Subgroup_11	norank_o__norank_c__Subgroup_11	norank_f__norank_o__norank_c__Subgroup_11	uncultured_bacterium_g__norank_f__norank_o__norank_c__Subgroup_11	0.858606	0	21	16	8	2	0	10	0	0	6	0	0	11	5	5	0	0	14	26	0	10	10	10	10	8	12	0	0	0	19	14	0	0	0	0	12	0	14	0	8	6
ASV1103	Bacteria	Actinobacteriota	Actinobacteria	0319-7L14	norank_o__0319-7L14	norank_f__norank_o__0319-7L14	NA	0.998381	6	0	0	0	7	0	0	0	0	0	0	14	0	0	0	32	0	0	5	0	0	12	7	0	18	0	4	0	0	0	0	0	0	13	0	27	0	6	0	5	0
ASV714	Bacteria	Actinobacteriota	Actinobacteria	0319-7L14	norank_o__0319-7L14	norank_f__norank_o__0319-7L14	uncultured_bacterium_g__norank_f__norank_o__0319-7L14	0.863741	10	24	13	11	0	0	4	0	16	6	0	0	22	13	0	33	11	26	16	9	14	6	16	20	14	5	6	27	8	15	17	10	6	4	0	46	14	13	0	0	11
ASV3306	Bacteria	Actinobacteriota	Actinobacteria	0319-7L14	norank_o__0319-7L14	norank_f__norank_o__0319-7L14	uncultured_Actinomycetales_bacterium_g__norank_f__norank_o__0319-7L14	0.706246	0	0	21	21	57	5	0	0	0	25	7	39	24	17	12	0	0	20	39	8	0	67	39	0	37	21	11	13	7	13	0	16	13	7	0	0	17	0	0	0	56
ASV314	Bacteria	Actinobacteriota	Actinobacteria	0319-7L14	norank_o__0319-7L14	norank_f__norank_o__0319-7L14	uncultured_Actinomycetales_bacterium_g__norank_f__norank_o__0319-7L14	0.907741	20	15	0	0	0	0	7	0	21	0	0	0	0	0	0	76	23	0	0	0	12	0	0	8	0	0	0	0	0	0	18	0	0	0	0	19	0	11	0	7	0
ASV1234	Bacteria	Actinobacteriota	Actinobacteria	0319-7L14	norank_o__0319-7L14	norank_f__norank_o__0319-7L14	uncultured_bacterium_g__norank_f__norank_o__0319-7L14	0.908072	5	0	28	21	38	0	0	0	0	25	11	48	8	23	11	7	0	6	22	0	0	38	45	4	32	27	9	11	0	0	7	35	0	0	0	13	7	6	6	0	43
ASV3358	Bacteria	Actinobacteriota	MB-A2-108	norank_c__MB-A2-108	norank_o__norank_c__MB-A2-108	norank_f__norank_o__norank_c__MB-A2-108	uncultured_bacterium_g__norank_f__norank_o__norank_c__MB-A2-108	0.786147	0	0	19	26	27	0	0	0	0	13	7	16	0	20	16	0	0	0	19	0	0	32	25	0	10	6	6	0	0	0	0	13	0	0	0	0	0	0	0	0	22
ASV3368	Bacteria	Actinobacteriota	MB-A2-108	norank_c__MB-A2-108	norank_o__norank_c__MB-A2-108	norank_f__norank_o__norank_c__MB-A2-108	NA	0.999884	0	0	19	17	73	0	0	0	0	22	17	30	0	24	17	0	0	0	29	0	0	75	43	0	13	15	8	0	0	0	0	24	0	0	0	0	0	0	0	0	45
ASV263	Bacteria	Actinobacteriota	MB-A2-108	norank_c__MB-A2-108	norank_o__norank_c__MB-A2-108	norank_f__norank_o__norank_c__MB-A2-108	NA	0.999203	22	29	0	0	0	13	15	0	28	0	0	0	28	0	0	30	19	13	0	13	27	0	0	35	0	0	0	17	10	29	34	0	8	13	0	25	35	38	0	16	0
ASV352	Bacteria	Actinobacteriota	MB-A2-108	norank_c__MB-A2-108	norank_o__norank_c__MB-A2-108	norank_f__norank_o__norank_c__MB-A2-108	uncultured_bacterium_g__norank_f__norank_o__norank_c__MB-A2-108	0.814376	19	0	0	0	0	0	0	21	11	0	0	0	0	0	0	30	22	14	0	0	15	0	0	0	0	0	0	0	0	10	0	0	0	0	0	0	23	27	0	0	0
ASV812	Bacteria	Actinobacteriota	MB-A2-108	norank_c__MB-A2-108	norank_o__norank_c__MB-A2-108	norank_f__norank_o__norank_c__MB-A2-108	uncultured_bacterium_g__norank_f__norank_o__norank_c__MB-A2-108	0.874846	9	13	0	0	0	0	0	0	0	0	0	0	0	0	0	0	0	0	0	17	0	0	0	0	0	0	0	0	5	0	18	0	0	0	0	11	0	0	6	0	0
ASV240	Bacteria	Actinobacteriota	MB-A2-108	norank_c__MB-A2-108	norank_o__norank_c__MB-A2-108	norank_f__norank_o__norank_c__MB-A2-108	NA	0.999949	23	26	26	27	54	8	24	10	15	42	49	0	23	36	45	20	23	25	48	26	25	90	38	30	0	0	30	8	17	19	24	50	6	6	9	23	29	28	17	10	43
ASV3383	Bacteria	Actinobacteriota	MB-A2-108	norank_c__MB-A2-108	norank_o__norank_c__MB-A2-108	norank_f__norank_o__norank_c__MB-A2-108	NA	0.999939	0	0	19	0	0	0	0	0	0	0	0	0	0	0	0	0	0	0	0	0	0	43	0	0	0	0	0	0	0	0	0	0	0	0	0	0	0	0	0	0	0
ASV3401	Bacteria	Actinobacteriota	MB-A2-108	norank_c__MB-A2-108	norank_o__norank_c__MB-A2-108	norank_f__norank_o__norank_c__MB-A2-108	NA	0.999923	0	0	18	20	24	0	0	0	0	10	0	12	0	14	0	0	0	0	34	0	0	32	18	0	6	6	0	0	0	0	0	18	0	0	0	0	0	0	0	0	17
ASV3236	Bacteria	Actinobacteriota	MB-A2-108	norank_c__MB-A2-108	norank_o__norank_c__MB-A2-108	norank_f__norank_o__norank_c__MB-A2-108	NA	0.99996	0	0	25	32	39	0	0	0	0	0	0	44	0	0	0	0	0	0	37	0	0	63	19	0	40	41	0	0	0	0	0	0	0	0	0	0	0	0	0	0	22
ASV1096	Bacteria	Actinobacteriota	MB-A2-108	norank_c__MB-A2-108	norank_o__norank_c__MB-A2-108	norank_f__norank_o__norank_c__MB-A2-108	uncultured_bacterium_g__norank_f__norank_o__norank_c__MB-A2-108	0.706129	6	7	12	11	15	0	0	0	0	9	0	15	11	7	5	11	0	0	18	0	0	25	11	0	0	9	0	0	0	0	15	15	0	0	0	11	0	0	0	10	0
ASV3839	Bacteria	Actinobacteriota	MB-A2-108	norank_c__MB-A2-108	norank_o__norank_c__MB-A2-108	norank_f__norank_o__norank_c__MB-A2-108	NA	0.973132	0	0	9	18	28	0	0	0	0	8	9	5	0	10	8	0	0	0	14	0	0	35	13	0	4	4	0	0	0	0	0	18	0	0	0	0	0	0	0	0	12
ASV2077	Bacteria	Actinobacteriota	MB-A2-108	norank_c__MB-A2-108	norank_o__norank_c__MB-A2-108	norank_f__norank_o__norank_c__MB-A2-108	NA	0.92106	0	11	0	0	0	0	18	13	0	0	0	0	0	0	0	0	0	0	0	0	15	0	0	0	0	0	0	0	10	21	15	0	0	0	0	0	17	26	0	0	0
ASV3055	Bacteria	Actinobacteriota	MB-A2-108	norank_c__MB-A2-108	norank_o__norank_c__MB-A2-108	norank_f__norank_o__norank_c__MB-A2-108	NA	0.772835	0	0	42	47	33	0	0	0	0	33	24	27	20	30	26	0	26	0	42	0	0	37	30	0	15	18	12	0	0	0	36	31	0	0	0	18	0	0	8	10	28
ASV2119	Bacteria	Actinobacteriota	MB-A2-108	norank_c__MB-A2-108	norank_o__norank_c__MB-A2-108	norank_f__norank_o__norank_c__MB-A2-108	NA	0.784302	0	11	0	0	0	0	0	0	29	0	0	0	0	0	0	27	0	18	0	0	16	0	0	11	0	0	0	0	0	0	0	0	5	0	0	0	17	0	0	0	0
ASV44	Bacteria	Actinobacteriota	MB-A2-108	norank_c__MB-A2-108	norank_o__norank_c__MB-A2-108	norank_f__norank_o__norank_c__MB-A2-108	uncultured_bacterium_g__norank_f__norank_o__norank_c__MB-A2-108	0.949546	48	49	0	0	0	7	20	17	23	0	0	0	19	0	0	32	21	26	0	18	32	0	0	19	0	0	0	13	12	27	39	0	19	0	0	35	37	43	3	17	0
ASV3242	Bacteria	Actinobacteriota	Actinobacteria	Euzebyales	Euzebyaceae	norank_f__Euzebyaceae	NA	0.996369	0	0	24	16	33	0	0	0	0	0	15	9	0	27	14	0	0	0	26	0	0	12	19	0	4	13	25	19	0	0	0	0	0	0	17	8	0	0	0	0	13
ASV793	Bacteria	Actinobacteriota	MB-A2-108	norank_c__MB-A2-108	norank_o__norank_c__MB-A2-108	norank_f__norank_o__norank_c__MB-A2-108	uncultured_actinobacterium_g__norank_f__norank_o__norank_c__MB-A2-108	0.932804	9	11	0	0	0	0	12	10	0	0	0	0	4	0	0	7	8	11	0	13	16	0	0	0	0	0	0	0	0	16	0	3	8	0	0	3	32	18	10	15	0
ASV492	Bacteria	Actinobacteriota	MB-A2-108	norank_c__MB-A2-108	norank_o__norank_c__MB-A2-108	norank_f__norank_o__norank_c__MB-A2-108	uncultured_actinobacterium_g__norank_f__norank_o__norank_c__MB-A2-108	0.725129	15	10	0	0	0	0	18	14	7	0	0	0	0	0	0	25	19	0	17	0	16	0	0	5	0	0	0	0	0	12	27	9	16	0	0	7	24	24	5	25	0
ASV1686	Bacteria	Actinobacteriota	MB-A2-108	norank_c__MB-A2-108	norank_o__norank_c__MB-A2-108	norank_f__norank_o__norank_c__MB-A2-108	uncultured_actinobacterium_g__norank_f__norank_o__norank_c__MB-A2-108	0.984952	0	25	9	0	9	0	0	0	20	12	0	9	21	0	13	25	20	18	25	0	0	17	0	17	0	16	0	0	0	0	19	11	13	0	0	20	21	33	0	0	0
ASV447	Bacteria	Actinobacteriota	MB-A2-108	norank_c__MB-A2-108	norank_o__norank_c__MB-A2-108	norank_f__norank_o__norank_c__MB-A2-108	uncultured_actinobacterium_g__norank_f__norank_o__norank_c__MB-A2-108	0.961353	16	11	0	0	0	11	20	0	0	0	0	0	5	0	0	8	7	19	0	22	13	0	0	10	0	0	0	0	18	13	0	0	0	0	0	0	19	0	10	0	0
ASV7374	Bacteria	Actinobacteriota	MB-A2-108	norank_c__MB-A2-108	norank_o__norank_c__MB-A2-108	norank_f__norank_o__norank_c__MB-A2-108	uncultured_actinobacterium_g__norank_f__norank_o__norank_c__MB-A2-108	0.88862	0	0	0	0	0	0	0	23	0	0	0	0	0	0	0	17	0	15	0	16	25	0	0	0	0	0	0	16	0	0	0	0	0	0	0	0	0	0	0	26	0
ASV551	Bacteria	Actinobacteriota	MB-A2-108	norank_c__MB-A2-108	norank_o__norank_c__MB-A2-108	norank_f__norank_o__norank_c__MB-A2-108	uncultured_actinobacterium_g__norank_f__norank_o__norank_c__MB-A2-108	0.951485	13	15	18	12	10	7	19	11	10	8	0	11	19	3	8	36	26	25	12	20	32	0	0	26	0	4	0	9	12	28	18	12	5	0	0	8	44	47	11	20	5
ASV5723	Bacteria	Actinobacteriota	MB-A2-108	norank_c__MB-A2-108	norank_o__norank_c__MB-A2-108	norank_f__norank_o__norank_c__MB-A2-108	uncultured_actinobacterium_g__norank_f__norank_o__norank_c__MB-A2-108	0.809334	0	0	0	0	12	0	0	0	0	11	9	0	0	0	19	0	0	0	34	0	0	25	8	0	14	10	19	0	0	0	0	16	0	0	0	0	0	0	0	0	10
ASV3262	Bacteria	Actinobacteriota	MB-A2-108	norank_c__MB-A2-108	norank_o__norank_c__MB-A2-108	norank_f__norank_o__norank_c__MB-A2-108	uncultured_actinobacterium_g__norank_f__norank_o__norank_c__MB-A2-108	0.818905	0	0	23	13	13	0	0	0	0	15	0	16	0	16	17	0	0	0	33	0	0	32	20	10	24	32	0	0	0	0	0	19	0	0	0	0	0	0	0	0	10
ASV419	Bacteria	Actinobacteriota	MB-A2-108	norank_c__MB-A2-108	norank_o__norank_c__MB-A2-108	norank_f__norank_o__norank_c__MB-A2-108	uncultured_actinobacterium_g__norank_f__norank_o__norank_c__MB-A2-108	0.930292	17	39	0	0	0	8	40	8	25	0	0	0	31	0	0	29	22	18	0	24	36	0	0	32	0	0	0	12	16	37	25	0	12	0	4	29	74	52	23	31	0
ASV595	Bacteria	Actinobacteriota	Acidimicrobiia	Actinomarinales	norank_o__Actinomarinales	norank_f__norank_o__Actinomarinales	uncultured_soil_bacterium_g__norank_f__norank_o__Actinomarinales	0.86936	12	29	23	0	0	19	39	17	27	18	0	0	17	16	0	33	25	30	23	19	27	0	0	20	12	11	8	13	40	45	14	0	9	44	4	0	33	23	27	18	0
ASV39	Bacteria	Actinobacteriota	Acidimicrobiia	Actinomarinales	norank_o__Actinomarinales	norank_f__norank_o__Actinomarinales	NA	0.989689	52	120	13	19	31	78	159	89	74	20	4	20	101	23	15	167	79	84	19	90	125	18	9	84	10	13	15	65	146	180	56	5	85	38	24	39	161	152	110	60	32
ASV1010	Bacteria	Actinobacteriota	Acidimicrobiia	Actinomarinales	norank_o__Actinomarinales	norank_f__norank_o__Actinomarinales	NA	1	7	26	0	0	0	7	26	0	0	0	0	0	0	0	0	12	4	0	0	9	18	0	0	8	0	0	0	0	11	0	8	0	0	23	0	0	27	20	0	0	0
ASV735	Bacteria	Actinobacteriota	Acidimicrobiia	Actinomarinales	norank_o__Actinomarinales	norank_f__norank_o__Actinomarinales	NA	0.999958	10	29	0	0	0	0	49	8	52	0	0	0	42	0	0	82	43	19	0	0	26	0	0	34	0	0	0	23	16	47	19	0	15	31	23	13	33	30	16	15	0
ASV6625	Bacteria	Actinobacteriota	Acidimicrobiia	Actinomarinales	norank_o__Actinomarinales	norank_f__norank_o__Actinomarinales	uncultured_Actinomycetales_bacterium_g__norank_f__norank_o__Actinomarinales	0.930202	0	0	0	0	0	0	44	0	26	0	0	0	35	0	0	24	0	0	7	0	0	0	0	33	0	0	7	51	16	46	36	0	0	24	25	14	34	14	0	0	0
ASV357	Bacteria	Actinobacteriota	Acidimicrobiia	Actinomarinales	norank_o__Actinomarinales	norank_f__norank_o__Actinomarinales	uncultured_Actinomycetales_bacterium_g__norank_f__norank_o__Actinomarinales	0.814365	19	37	0	0	0	36	64	39	22	0	0	0	11	0	0	31	32	24	0	37	23	0	0	0	0	0	0	0	37	0	20	0	18	13	0	0	28	24	31	45	0
ASV265	Bacteria	Actinobacteriota	Acidimicrobiia	Actinomarinales	norank_o__Actinomarinales	norank_f__norank_o__Actinomarinales	uncultured_Actinomycetales_bacterium_g__norank_f__norank_o__Actinomarinales	0.895383	22	63	0	0	4	12	94	18	45	0	0	0	47	0	0	28	20	31	0	27	60	0	0	33	0	0	0	48	32	74	39	0	18	24	25	26	46	28	32	0	0
ASV553	Bacteria	Actinobacteriota	Acidimicrobiia	IMCC26256	norank_o__IMCC26256	norank_f__norank_o__IMCC26256	uncultured_actinobacterium_g__norank_f__norank_o__IMCC26256	0.952487	13	13	0	8	7	11	31	7	10	5	0	0	21	0	0	30	14	24	9	11	14	8	0	11	2	0	6	0	20	12	7	0	8	8	4	9	29	14	16	14	0
ASV3424	Bacteria	Actinobacteriota	Acidimicrobiia	norank_c__Acidimicrobiia	norank_o__norank_c__Acidimicrobiia	norank_f__norank_o__norank_c__Acidimicrobiia	uncultured_bacterium_g__norank_f__norank_o__norank_c__Acidimicrobiia	0.70008	0	0	17	14	12	0	0	0	0	13	4	6	0	32	8	4	0	0	17	0	0	17	12	0	5	6	19	0	0	0	0	32	0	0	0	0	0	0	6	0	33
ASV246	Bacteria	Actinobacteriota	Acidimicrobiia	norank_c__Acidimicrobiia	norank_o__norank_c__Acidimicrobiia	norank_f__norank_o__norank_c__Acidimicrobiia	uncultured_Iamia_sp._g__norank	0.83275	23	16	19	20	7	7	15	12	19	9	12	17	15	18	12	32	15	18	11	16	20	11	13	13	8	17	15	25	16	13	24	35	13	15	15	13	26	26	42	20	15
ASV324	Bacteria	Actinobacteriota	Acidimicrobiia	IMCC26256	norank_o__IMCC26256	norank_f__norank_o__IMCC26256	uncultured_Actinomycetales_bacterium_g__norank_f__norank_o__IMCC26256	0.744785	20	32	20	0	21	11	0	15	0	0	35	0	0	19	0	0	18	0	0	0	45	29	0	0	0	0	49	0	0	0	16	40	16	0	23	0	28	28	0	0	0
ASV4763	Bacteria	Actinobacteriota	Acidimicrobiia	IMCC26256	norank_o__IMCC26256	norank_f__norank_o__IMCC26256	NA	0.86216	0	0	0	17	0	0	0	0	0	0	0	0	0	0	0	0	0	0	0	0	0	0	36	0	0	0	0	0	0	0	0	0	0	0	0	0	0	0	0	0	0
ASV4668	Bacteria	Actinobacteriota	Acidimicrobiia	IMCC26256	norank_o__IMCC26256	norank_f__norank_o__IMCC26256	NA	0.901667	0	0	0	26	32	0	0	0	0	0	0	0	36	0	23	0	0	0	0	0	0	0	0	31	32	0	0	0	0	0	25	0	0	0	0	0	0	0	0	14	39
ASV3146	Bacteria	Actinobacteriota	Acidimicrobiia	IMCC26256	norank_o__IMCC26256	norank_f__norank_o__IMCC26256	NA	0.862806	0	0	31	0	0	0	0	0	0	44	0	40	0	0	0	21	0	0	30	0	0	0	0	0	0	33	0	0	26	0	0	50	0	32	0	0	0	0	0	0	0
ASV6436	Bacteria	Actinobacteriota	Acidimicrobiia	norank_c__Acidimicrobiia	norank_o__norank_c__Acidimicrobiia	norank_f__norank_o__norank_c__Acidimicrobiia	uncultured_Acidimicrobiia_bacterium_g__norank	0.974286	0	0	0	0	0	12	39	11	0	0	0	0	17	0	0	19	17	16	0	21	13	0	0	13	0	0	0	0	24	0	18	0	0	17	0	0	13	14	22	0	24
ASV2013	Bacteria	Actinobacteriota	Acidimicrobiia	norank_c__Acidimicrobiia	norank_o__norank_c__Acidimicrobiia	norank_f__norank_o__norank_c__Acidimicrobiia	uncultured_Acidimicrobiia_bacterium_g__norank	0.95905	0	13	20	37	19	0	0	0	14	12	0	20	0	21	0	0	0	0	15	0	0	18	0	0	14	17	0	18	0	0	0	26	0	0	11	10	0	0	0	10	0
ASV5700	Bacteria	Actinobacteriota	Acidimicrobiia	norank_c__Acidimicrobiia	norank_o__norank_c__Acidimicrobiia	norank_f__norank_o__norank_c__Acidimicrobiia	uncultured_soil_bacterium_g__norank_f__norank_o__norank_c__Acidimicrobiia	0.906434	0	0	0	0	14	0	0	0	0	10	0	0	0	20	8	0	0	0	0	0	0	17	0	0	13	10	13	0	0	0	0	23	0	0	0	0	0	0	0	0	21
ASV531	Bacteria	Actinobacteriota	Acidimicrobiia	norank_c__Acidimicrobiia	norank_o__norank_c__Acidimicrobiia	norank_f__norank_o__norank_c__Acidimicrobiia	uncultured_soil_bacterium_g__norank_f__norank_o__norank_c__Acidimicrobiia	0.985614	14	16	7	11	0	5	13	12	14	0	12	7	20	0	0	30	16	15	14	0	22	0	15	15	0	0	0	17	17	22	20	0	18	8	20	14	19	10	15	19	0
ASV639	Bacteria	Actinobacteriota	Acidimicrobiia	norank_c__Acidimicrobiia	norank_o__norank_c__Acidimicrobiia	norank_f__norank_o__norank_c__Acidimicrobiia	uncultured_Acidimicrobiia_bacterium_g__norank	0.996942	12	0	0	0	0	0	8	0	14	0	0	0	13	0	0	26	11	4	0	0	8	0	0	0	0	0	0	0	6	0	22	0	0	0	0	15	8	0	10	0	0
ASV3654	Bacteria	Actinobacteriota	Acidimicrobiia	norank_c__Acidimicrobiia	norank_o__norank_c__Acidimicrobiia	norank_f__norank_o__norank_c__Acidimicrobiia	uncultured_Acidimicrobiia_bacterium_g__norank	0.853509	0	0	12	23	13	0	0	0	0	0	10	20	0	8	0	0	0	0	9	0	0	20	0	0	10	0	24	0	0	0	0	0	0	8	0	0	0	0	0	0	14
ASV8170	Bacteria	Actinobacteriota	Acidimicrobiia	norank_c__Acidimicrobiia	norank_o__norank_c__Acidimicrobiia	norank_f__norank_o__norank_c__Acidimicrobiia	uncultured_Acidimicrobiia_bacterium_g__norank	0.887844	0	0	0	0	0	0	0	0	0	10	0	0	0	0	22	0	0	0	0	0	0	0	0	0	0	15	0	14	0	0	0	12	0	0	13	0	0	0	0	0	0
ASV607	Bacteria	Actinobacteriota	Acidimicrobiia	norank_c__Acidimicrobiia	norank_o__norank_c__Acidimicrobiia	norank_f__norank_o__norank_c__Acidimicrobiia	uncultured_soil_bacterium_g__norank_f__norank_o__norank_c__Acidimicrobiia	0.732806	12	25	0	0	0	18	26	14	5	0	0	0	22	0	0	28	13	15	0	14	14	0	0	13	0	0	0	0	29	7	16	0	0	0	0	0	17	28	11	12	0
ASV2314	Bacteria	Actinobacteriota	Acidimicrobiia	IMCC26256	norank_o__IMCC26256	norank_f__norank_o__IMCC26256	NA	0.999522	0	8	33	22	21	0	0	0	0	0	12	17	0	12	15	15	0	0	14	0	0	18	18	0	19	9	0	0	0	0	0	13	0	0	0	0	0	0	0	0	0
ASV3571	Bacteria	Actinobacteriota	Acidimicrobiia	IMCC26256	norank_o__IMCC26256	norank_f__norank_o__IMCC26256	NA	0.998909	0	0	14	15	16	0	0	0	0	0	0	5	0	0	11	0	0	0	20	0	0	0	15	0	0	9	0	0	0	0	0	0	0	0	0	0	0	0	0	0	14
ASV8139	Bacteria	Actinobacteriota	Acidimicrobiia	IMCC26256	norank_o__IMCC26256	norank_f__norank_o__IMCC26256	NA	0.998566	0	0	0	0	0	0	0	0	0	12	8	0	17	24	0	0	0	0	0	0	0	11	8	8	0	0	0	10	0	0	27	0	0	13	8	0	0	0	0	14	0
ASV559	Bacteria	Actinobacteriota	Acidimicrobiia	IMCC26256	norank_o__IMCC26256	norank_f__norank_o__IMCC26256	NA	0.998397	13	21	0	0	0	11	0	0	0	0	0	0	0	0	0	0	12	16	0	0	17	0	0	0	0	0	0	0	0	12	0	0	10	0	0	0	23	22	14	0	0
ASV6654	Bacteria	Actinobacteriota	Acidimicrobiia	IMCC26256	norank_o__IMCC26256	norank_f__norank_o__IMCC26256	NA	0.997346	0	0	0	0	0	0	25	17	23	0	0	0	0	0	0	20	0	0	0	11	0	0	0	0	0	0	0	0	11	0	0	0	0	0	0	10	0	0	0	0	0
ASV565	Bacteria	Actinobacteriota	Acidimicrobiia	IMCC26256	norank_o__IMCC26256	norank_f__norank_o__IMCC26256	uncultured_Acidimicrobiia_bacterium_g__norank_f__norank	0.822339	13	15	37	19	18	29	28	0	26	21	7	6	42	30	14	28	30	16	31	13	18	20	19	22	18	11	20	26	25	25	35	17	20	27	22	25	28	24	20	23	21
ASV5821	Bacteria	Actinobacteriota	Acidimicrobiia	IMCC26256	norank_o__IMCC26256	norank_f__norank_o__IMCC26256	uncultured_Acidimicrobiia_bacterium_g__norank_f__norank	0.752681	0	0	0	0	10	0	0	0	0	0	0	0	0	19	0	0	0	0	0	0	0	0	11	0	0	0	17	0	0	0	0	0	0	0	0	0	0	0	0	0	20
ASV934	Bacteria	Actinobacteriota	Acidimicrobiia	IMCC26256	norank_o__IMCC26256	norank_f__norank_o__IMCC26256	uncultured_Ferrimicrobium_sp._g__norank	0.762787	7	8	0	0	0	19	14	14	6	0	0	0	9	0	0	20	15	12	0	10	11	0	3	0	0	0	0	7	23	9	6	0	11	0	5	8	9	7	8	0	0
ASV2074	Bacteria	Actinobacteriota	Acidimicrobiia	Microtrichales	Microtrichaceae	norank_f__Microtrichaceae	uncultured_Actinomycetales_bacterium_g__norank_f__Microtrichaceae	0.964773	0	11	0	0	0	11	15	18	4	0	0	0	7	0	0	8	5	6	0	12	13	0	0	8	0	0	0	18	0	0	15	3	10	22	21	5	14	15	12	0	0
ASV340	Bacteria	Actinobacteriota	Acidimicrobiia	Microtrichales	norank_o__Microtrichales	norank_f__norank_o__Microtrichales	uncultured_Actinomycetales_bacterium_g__norank_f__norank_o__Microtrichales	0.72907	19	0	2	4	0	4	9	5	16	0	4	0	11	0	0	12	11	8	3	6	0	0	0	13	3	0	4	15	0	6	14	3	7	36	21	19	8	26	0	9	0
ASV8234	Bacteria	Actinobacteriota	Acidimicrobiia	Microtrichales	norank_o__Microtrichales	norank_f__norank_o__Microtrichales	wastewater_metagenome_g__norank_f__norank_o__Microtrichales	0.903781	0	0	0	0	0	0	0	0	0	6	7	0	11	11	8	0	17	0	7	6	0	0	10	5	0	0	11	9	0	0	13	0	0	12	11	12	0	0	0	13	7
ASV154	Bacteria	Actinobacteriota	Acidimicrobiia	Microtrichales	norank_o__Microtrichales	norank_f__norank_o__Microtrichales	NA	0.763985	28	33	0	34	0	48	46	46	34	0	15	24	22	32	27	38	0	24	26	32	26	0	0	0	21	0	0	45	33	39	26	31	18	24	23	13	31	31	36	30	36
ASV660	Bacteria	Actinobacteriota	Acidimicrobiia	Microtrichales	norank_o__Microtrichales	norank_f__norank_o__Microtrichales	NA	0.727831	11	13	42	51	33	10	32	8	0	20	10	25	10	51	23	14	13	11	43	14	11	42	40	0	37	19	30	0	23	17	0	48	0	20	0	0	17	21	13	9	61
ASV1655	Bacteria	Actinobacteriota	Acidimicrobiia	IMCC26256	norank_o__IMCC26256	norank_f__norank_o__IMCC26256	NA	0.987247	0	29	0	29	37	0	47	0	0	0	9	0	41	45	0	45	44	0	0	0	0	0	0	0	0	0	0	0	25	26	0	0	0	0	0	0	40	36	0	41	0
ASV1615	Bacteria	Actinobacteriota	Acidimicrobiia	IMCC26256	norank_o__IMCC26256	norank_f__norank_o__IMCC26256	NA	0.984197	0	36	37	32	23	0	32	0	0	34	0	30	22	39	26	0	0	30	14	0	0	67	43	0	40	36	36	0	0	0	0	45	0	0	0	0	0	0	0	0	40
ASV7363	Bacteria	Actinobacteriota	Acidimicrobiia	IMCC26256	norank_o__IMCC26256	norank_f__norank_o__IMCC26256	NA	0.981161	0	0	0	0	0	0	0	36	0	0	0	0	0	0	0	21	0	0	0	0	17	0	0	0	0	0	0	0	12	19	0	0	0	27	0	30	16	20	0	0	0
ASV81	Bacteria	Actinobacteriota	Acidimicrobiia	IMCC26256	norank_o__IMCC26256	norank_f__norank_o__IMCC26256	NA	0.987073	37	37	0	0	0	34	49	0	22	0	0	0	0	0	0	34	40	41	0	45	52	0	0	42	0	0	0	38	33	45	51	0	46	0	23	0	47	45	33	0	0
ASV8583	Bacteria	Actinobacteriota	Acidimicrobiia	IMCC26256	norank_o__IMCC26256	norank_f__norank_o__IMCC26256	NA	0.98671	0	0	0	0	0	0	0	0	0	0	0	27	0	0	0	0	0	0	26	0	0	0	0	0	0	0	0	0	0	0	0	28	0	0	0	0	0	0	0	0	22
ASV927	Bacteria	Actinobacteriota	Acidimicrobiia	Microtrichales	Iamiaceae	Iamia	NA	0.995947	8	0	32	41	22	0	16	9	0	41	30	44	10	23	14	21	17	10	31	10	0	25	21	0	23	23	17	0	0	0	22	0	10	49	9	0	20	25	25	0	35
ASV3965	Bacteria	Actinobacteriota	Acidimicrobiia	Microtrichales	Iamiaceae	Iamia	NA	0.996382	0	0	8	9	16	0	0	0	0	0	7	0	0	16	10	18	12	0	16	0	0	0	15	0	8	8	0	0	0	0	0	0	0	0	0	0	12	0	0	0	15
ASV1831	Bacteria	Actinobacteriota	Acidimicrobiia	Microtrichales	Iamiaceae	Iamia	NA	0.980933	0	18	0	0	0	0	24	18	27	0	0	0	26	0	0	53	27	27	0	0	19	0	0	12	0	0	0	21	37	30	34	0	21	17	33	23	21	25	26	26	0
ASV218	Bacteria	Actinobacteriota	Acidimicrobiia	Microtrichales	Iamiaceae	Iamia	NA	0.947045	24	29	23	27	25	32	33	35	44	41	25	23	52	38	36	51	45	0	33	20	24	31	34	34	16	21	32	57	0	34	59	0	31	20	32	31	33	30	30	30	43
ASV7755	Bacteria	Actinobacteriota	Acidimicrobiia	Microtrichales	Iamiaceae	Iamia	NA	0.941468	0	0	0	0	0	0	0	0	11	0	0	0	0	0	0	0	0	0	0	0	0	0	0	0	0	0	0	0	0	0	0	30	0	0	0	0	0	0	0	0	0
ASV6772	Bacteria	Actinobacteriota	Acidimicrobiia	Microtrichales	Iamiaceae	Iamia	NA	0.997952	0	0	0	0	0	0	13	0	0	0	0	0	0	0	0	0	0	0	0	0	0	0	0	0	0	0	18	0	0	0	17	0	0	0	0	0	0	0	0	0	0
ASV97	Bacteria	Actinobacteriota	Acidimicrobiia	Microtrichales	Iamiaceae	Iamia	NA	0.998059	34	27	0	0	0	29	0	25	19	0	0	0	28	0	0	38	19	22	0	26	32	0	0	0	0	0	0	25	23	30	42	0	40	0	27	53	13	16	21	34	0
ASV92	Bacteria	Actinobacteriota	Acidimicrobiia	Microtrichales	Iamiaceae	Iamia	NA	0.996385	35	43	0	26	18	23	33	16	21	0	0	0	32	20	24	37	33	18	0	19	38	25	20	17	0	0	20	0	26	38	46	17	21	30	16	31	43	42	15	22	30
ASV8590	Bacteria	Actinobacteriota	Acidimicrobiia	Microtrichales	Iamiaceae	Iamia	NA	0.997391	0	0	0	0	0	0	0	0	0	0	0	24	0	0	0	0	0	0	0	0	0	0	0	0	0	0	13	0	0	0	0	35	0	0	0	0	0	0	0	0	0
ASV4750	Bacteria	Actinobacteriota	Acidimicrobiia	Microtrichales	Iamiaceae	Iamia	NA	0.912041	0	0	0	17	9	0	0	0	0	0	0	0	0	0	0	0	0	0	0	0	0	0	0	0	0	0	0	0	0	0	0	20	0	0	0	0	0	0	0	0	0
ASV1644	Bacteria	Actinobacteriota	Acidimicrobiia	Microtrichales	Iamiaceae	Iamia	NA	0.957901	0	30	0	0	0	0	0	0	0	0	0	0	0	0	0	0	0	18	0	0	0	0	0	0	0	0	0	0	0	0	0	0	0	0	0	0	0	30	0	22	0
ASV434	Bacteria	Actinobacteriota	Acidimicrobiia	Microtrichales	norank_o__Microtrichales	norank_f__norank_o__Microtrichales	NA	0.973618	16	17	0	0	0	10	8	0	0	0	0	0	13	0	9	9	13	5	0	7	16	7	0	14	0	0	0	9	12	19	25	0	10	0	11	23	13	18	0	13	7
ASV2598	Bacteria	Actinobacteriota	Acidimicrobiia	Microtrichales	Iamiaceae	Iamia	uncultured_Iamiaceae_bacterium_g__Iamia	0.896592	0	5	9	0	10	0	10	5	0	16	0	14	0	16	11	7	0	0	10	0	5	0	0	0	0	0	0	0	0	6	6	0	6	5	0	7	5	0	0	10	0
ASV508	Bacteria	Actinobacteriota	Acidimicrobiia	Microtrichales	Iamiaceae	Iamia	Aquihabitans_daechungensis	0.859123	14	33	4	10	0	9	15	14	16	0	9	0	14	8	0	19	26	9	0	7	21	5	0	17	0	0	0	20	15	28	28	12	20	12	58	20	7	16	26	6	0
ASV3564	Bacteria	Actinobacteriota	Acidimicrobiia	Microtrichales	Iamiaceae	Iamia	uncultured_bacterium_g__Iamia	0.854913	0	0	14	17	0	15	0	0	13	14	15	15	0	0	11	0	0	0	18	10	12	21	0	0	8	6	0	0	0	0	22	21	0	0	0	0	0	0	0	0	14
ASV1074	Bacteria	Actinobacteriota	Acidimicrobiia	Microtrichales	Ilumatobacteraceae	norank_f__Ilumatobacteraceae	metagenome_g__norank_f__Ilumatobacteraceae	0.718731	6	16	0	15	0	0	0	0	0	10	0	0	12	11	0	0	0	0	0	0	7	0	11	0	0	12	0	0	11	13	19	15	0	8	0	0	0	14	0	0	21
ASV1190	Bacteria	Actinobacteriota	Acidimicrobiia	Microtrichales	Ilumatobacteraceae	CL500-29_marine_group	NA	0.884903	5	0	10	0	0	0	16	0	20	0	0	0	14	6	0	15	6	13	0	0	11	0	11	16	0	4	0	18	5	7	14	0	11	18	18	0	22	0	11	18	0
ASV3227	Bacteria	Actinobacteriota	Acidimicrobiia	Microtrichales	Ilumatobacteraceae	CL500-29_marine_group	NA	0.999892	0	0	25	0	19	0	0	16	0	0	13	0	0	0	0	20	0	10	0	0	20	0	36	0	0	0	0	0	0	0	0	24	19	0	0	0	24	28	25	0	0
ASV6695	Bacteria	Actinobacteriota	Acidimicrobiia	Microtrichales	Ilumatobacteraceae	CL500-29_marine_group	NA	0.999877	0	0	0	0	0	0	18	0	0	0	0	0	0	0	0	0	0	0	0	7	0	17	0	12	0	0	0	0	0	17	0	0	0	21	0	0	0	0	0	0	0
ASV8157	Bacteria	Actinobacteriota	Acidimicrobiia	Microtrichales	Ilumatobacteraceae	CL500-29_marine_group	uncultured_soil_bacterium_g__CL500-29_marine_group	0.744181	0	0	0	0	0	0	0	0	0	11	0	0	0	20	10	0	0	0	0	0	0	0	0	0	22	0	0	0	22	0	0	0	0	0	0	0	0	0	0	0	0
ASV1849	Bacteria	Actinobacteriota	Acidimicrobiia	Microtrichales	Ilumatobacteraceae	norank_f__Ilumatobacteraceae	NA	0.787233	0	17	52	84	71	0	0	0	0	34	41	117	25	51	45	0	32	0	31	0	0	58	41	0	46	66	45	0	34	41	36	47	0	17	0	0	0	14	0	0	68
ASV10870	Bacteria	Actinobacteriota	Acidimicrobiia	Microtrichales	Ilumatobacteraceae	NA	NA	0.999973	0	0	0	0	0	0	0	0	0	0	0	0	0	0	0	0	10	0	0	0	0	0	0	0	0	0	0	0	0	7	25	0	0	13	0	0	0	0	0	0	0
ASV5047	Bacteria	Actinobacteriota	Acidimicrobiia	Microtrichales	Ilumatobacteraceae	norank_f__Ilumatobacteraceae	NA	0.783828	0	0	0	8	16	0	0	0	0	0	0	0	0	17	7	0	0	0	12	0	0	0	16	0	0	0	16	0	0	0	0	7	0	0	0	0	0	13	0	0	0
ASV328	Bacteria	Actinobacteriota	Acidimicrobiia	Microtrichales	Ilumatobacteraceae	norank_f__Ilumatobacteraceae	NA	0.769609	20	17	0	0	0	26	38	19	38	0	0	0	33	7	0	34	21	27	0	26	24	0	0	14	0	0	0	31	24	36	16	0	21	23	26	24	34	25	22	32	0
ASV3109	Bacteria	Actinobacteriota	Acidimicrobiia	Microtrichales	Ilumatobacteraceae	norank_f__Ilumatobacteraceae	NA	0.949252	0	0	34	0	51	0	0	0	0	39	0	0	0	43	0	0	0	0	30	0	0	0	43	0	0	0	42	0	0	0	0	0	0	0	0	0	0	0	0	0	46
ASV1725	Bacteria	Actinobacteriota	Acidimicrobiia	Microtrichales	Ilumatobacteraceae	norank_f__Ilumatobacteraceae	NA	0.970484	0	23	0	0	0	0	24	0	0	0	0	0	0	0	0	0	0	0	0	0	45	0	0	0	0	0	0	0	0	0	0	0	0	0	0	0	36	27	27	0	0
ASV6862	Bacteria	Actinobacteriota	Acidimicrobiia	Microtrichales	Ilumatobacteraceae	norank_f__Ilumatobacteraceae	uncultured_bacterium_g__norank_f__Ilumatobacteraceae	0.730912	0	0	0	0	0	0	10	0	0	0	0	0	0	0	0	18	0	0	0	0	0	0	0	7	0	0	0	0	0	0	0	0	0	11	0	0	0	0	0	0	0
ASV398	Bacteria	Actinobacteriota	Acidimicrobiia	Microtrichales	Ilumatobacteraceae	norank_f__Ilumatobacteraceae	NA	0.911478	17	9	15	14	0	23	17	17	14	18	21	16	17	32	22	23	14	12	18	21	16	10	18	26	11	0	21	30	11	25	40	19	25	12	31	37	9	25	9	36	23
ASV2254	Bacteria	Actinobacteriota	Acidimicrobiia	Microtrichales	Ilumatobacteraceae	norank_f__Ilumatobacteraceae	NA	0.981198	0	9	0	0	0	0	8	20	24	0	0	0	0	0	0	0	0	26	0	0	0	0	0	0	0	0	0	29	0	13	0	0	20	14	28	28	12	9	0	0	0
ASV2504	Bacteria	Actinobacteriota	Acidimicrobiia	Microtrichales	Ilumatobacteraceae	norank_f__Ilumatobacteraceae	NA	0.879706	0	6	12	0	11	9	17	0	11	0	0	12	8	0	15	15	0	0	0	6	4	16	9	8	0	0	0	12	0	0	8	0	6	0	8	6	4	8	0	9	12
ASV2028	Bacteria	Actinobacteriota	Acidimicrobiia	Microtrichales	Ilumatobacteraceae	Ilumatobacter	NA	0.983902	0	12	9	5	0	0	0	9	6	0	0	0	4	8	0	12	15	0	6	6	8	0	0	9	7	0	0	0	0	0	0	0	0	0	16	0	0	10	9	0	0
ASV54	Bacteria	Actinobacteriota	Acidimicrobiia	Microtrichales	Ilumatobacteraceae	Ilumatobacter	NA	0.954349	44	47	73	76	108	58	68	42	44	65	35	76	54	123	66	90	49	43	65	47	63	76	80	47	30	44	88	67	56	67	46	45	33	40	60	55	53	31	54	37	110
ASV3250	Bacteria	Actinobacteriota	Acidimicrobiia	Microtrichales	Ilumatobacteraceae	Ilumatobacter	NA	0.944565	0	0	24	39	30	0	0	0	0	19	23	36	0	33	14	0	0	0	34	0	0	35	28	0	18	32	28	0	0	0	0	34	0	0	0	0	0	0	0	0	46
ASV903	Bacteria	Actinobacteriota	Acidimicrobiia	Microtrichales	Ilumatobacteraceae	Ilumatobacter	NA	0.881201	8	5	0	0	0	0	17	6	21	0	0	0	8	0	0	30	11	6	0	0	14	0	0	8	0	0	0	21	0	18	12	0	6	14	11	0	14	9	0	7	0
ASV772	Bacteria	Actinobacteriota	Acidimicrobiia	Microtrichales	Ilumatobacteraceae	Ilumatobacter	NA	0.966838	10	0	0	0	0	0	17	0	17	0	0	0	10	0	0	20	12	0	0	0	14	0	0	8	0	0	0	14	0	20	9	0	0	35	0	0	9	17	0	0	0
ASV256	Bacteria	Actinobacteriota	Acidimicrobiia	Microtrichales	Ilumatobacteraceae	Ilumatobacter	NA	0.950151	23	20	0	0	0	11	28	16	26	0	0	0	22	0	0	23	23	18	0	0	19	0	0	0	0	0	0	13	0	21	38	0	19	0	0	0	20	25	24	18	0
ASV3037	Bacteria	Actinobacteriota	Rubrobacteria	Rubrobacterales	Rubrobacteriaceae	Rubrobacter	uncultured_bacterium_g__Rubrobacter	0.834398	0	0	47	30	48	0	0	5	0	20	24	54	8	71	16	6	0	2	59	0	0	34	25	0	27	31	27	0	6	0	8	33	0	0	0	2	0	0	0	3	63
ASV3206	Bacteria	Actinobacteriota	Rubrobacteria	Rubrobacterales	Rubrobacteriaceae	Rubrobacter	uncultured_bacterium_g__Rubrobacter	0.803626	0	0	26	42	49	0	0	0	0	27	22	24	0	39	13	0	0	0	59	0	0	64	23	0	10	28	15	0	0	0	0	30	0	0	0	0	0	0	0	0	36
ASV1489	Bacteria	Actinobacteriota	Rubrobacteria	Rubrobacterales	Rubrobacteriaceae	Rubrobacter	NA	1	2	0	9	16	0	0	0	0	0	0	0	0	0	16	0	10	4	0	17	0	0	17	18	4	11	0	0	0	0	0	0	12	5	0	3	0	3	0	0	0	18
ASV3403	Bacteria	Actinobacteriota	Rubrobacteria	Rubrobacterales	Rubrobacteriaceae	Rubrobacter	uncultured_Rubrobacter_sp.	0.738488	0	0	18	0	36	0	0	0	0	11	14	0	0	13	0	0	0	0	21	0	0	27	0	0	0	10	0	0	0	0	0	14	0	0	0	0	0	0	0	0	16
ASV3140	Bacteria	Actinobacteriota	Rubrobacteria	Rubrobacterales	Rubrobacteriaceae	Rubrobacter	NA	1	0	0	31	18	43	0	0	0	0	14	17	49	0	25	14	4	0	3	20	0	3	23	9	0	23	17	11	3	0	0	9	20	0	0	0	0	0	0	4	0	19
ASV852	Bacteria	Actinobacteriota	Thermoleophilia	Gaiellales	norank_o__Gaiellales	norank_f__norank_o__Gaiellales	NA	0.9997	8	15	0	0	0	5	18	0	0	0	0	0	8	0	0	10	5	0	0	9	12	0	0	0	0	0	0	0	13	14	7	0	0	0	0	13	14	7	0	12	0
ASV3395	Bacteria	Actinobacteriota	Thermoleophilia	Gaiellales	norank_o__Gaiellales	norank_f__norank_o__Gaiellales	NA	0.999995	0	0	18	0	19	0	0	0	0	5	12	9	0	15	0	0	0	0	12	0	0	13	0	0	10	0	14	0	0	0	0	13	0	0	0	0	0	0	0	0	0
ASV6624	Bacteria	Firmicutes	Clostridia	Clostridiales	Clostridiaceae	Clostridium_sensu_stricto_1	NA	0.999762	0	0	0	0	0	0	44	0	24	0	0	0	13	0	0	26	14	0	0	0	12	0	0	11	0	0	0	12	0	10	16	0	12	15	0	0	16	14	7	16	0
ASV7787	Bacteria	Firmicutes	Clostridia	Peptostreptococcales-Tissierellales	Peptostreptococcaceae	Paraclostridium	NA	0.925578	0	0	0	0	0	0	0	0	8	0	6	0	0	4	0	0	42	0	0	0	0	0	0	0	0	0	0	0	0	0	28	0	0	12	0	7	0	0	0	5	0
ASV213	Bacteria	Firmicutes	Bacilli	Alicyclobacillales	Alicyclobacillaceae	Tumebacillus	NA	1	24	11	0	0	0	25	0	0	0	0	0	0	0	0	0	19	17	0	0	0	0	22	8	0	0	8	0	0	0	0	0	0	0	0	0	0	0	0	0	0	23
ASV3565	Bacteria	Firmicutes	Bacilli	Alicyclobacillales	Alicyclobacillaceae	Tumebacillus	Tumebacillus_avium	0.750669	0	0	14	10	20	0	0	0	0	125	0	40	0	28	0	0	0	0	16	0	0	23	8	0	7	9	0	0	0	0	0	0	0	0	0	0	0	0	0	0	12
ASV6710	Bacteria	Firmicutes	Bacilli	Alicyclobacillales	Alicyclobacillaceae	Tumebacillus	NA	0.999997	0	0	0	0	0	0	17	0	18	0	0	0	0	0	0	23	27	22	0	0	16	0	0	17	0	0	0	0	0	0	11	0	11	0	0	0	0	0	16	26	0
ASV913	Bacteria	Firmicutes	Bacilli	Alicyclobacillales	Alicyclobacillaceae	Tumebacillus	NA	0.999997	8	19	0	12	0	24	24	0	9	0	0	17	27	9	0	24	13	19	0	15	22	0	0	11	0	0	0	0	18	0	0	0	14	0	0	0	19	17	20	13	9
ASV6676	Bacteria	Firmicutes	Bacilli	Alicyclobacillales	Alicyclobacillaceae	Tumebacillus	uncultured_Tumebacillus_sp.	0.750711	0	0	0	0	0	0	21	20	0	0	0	0	0	0	0	0	0	0	0	0	0	0	0	0	0	0	0	19	0	24	18	0	0	0	7	9	0	15	0	0	0
ASV526	Bacteria	Firmicutes	Bacilli	Alicyclobacillales	Alicyclobacillaceae	Tumebacillus	NA	0.999996	14	0	0	0	25	0	0	0	0	0	0	0	0	0	0	0	0	0	0	20	0	13	19	0	0	0	0	0	17	0	0	0	0	14	0	0	18	0	0	0	0
ASV1851	Bacteria	Firmicutes	Bacilli	Alicyclobacillales	Alicyclobacillaceae	Tumebacillus	NA	0.999995	0	17	14	0	0	0	14	0	9	0	0	0	0	0	0	0	0	0	25	0	0	0	0	0	6	7	0	16	0	8	0	5	0	0	0	0	0	0	0	0	15
ASV860	Bacteria	Firmicutes	Bacilli	Thermoactinomycetales	Thermoactinomycetaceae	Shimazuella	NA	1	8	14	0	0	0	15	20	10	100	0	0	0	38	0	0	25	10	13	0	13	15	0	0	40	0	0	0	17	22	15	15	0	14	10	32	13	7	19	8	16	0
ASV781	Bacteria	Firmicutes	Bacilli	Paenibacillales	Paenibacillaceae	Ammoniphilus	NA	0.999815	9	29	6	0	0	41	90	26	21	0	0	6	6	0	4	38	17	22	15	22	64	3	0	21	4	2	0	27	22	62	38	0	10	12	26	11	53	43	37	46	0
ASV7626	Bacteria	Firmicutes	Bacilli	Bacillales	Planococcaceae	Lysinibacillus	NA	0.998211	0	0	0	0	0	0	0	0	30	0	0	0	0	0	0	0	0	0	0	0	0	0	0	19	0	0	0	15	0	0	15	0	0	0	0	0	29	0	0	16	0
ASV6793	Bacteria	Firmicutes	Bacilli	Bacillales	Planococcaceae	Lysinibacillus	NA	0.991621	0	0	0	0	0	0	12	0	15	0	0	0	0	0	0	0	7	0	0	0	13	0	0	15	0	0	0	0	0	15	16	0	12	0	10	9	12	15	0	10	0
ASV244	Bacteria	Firmicutes	Bacilli	Bacillales	Planococcaceae	Lysinibacillus	NA	0.925922	23	24	0	0	0	20	24	21	57	0	0	0	33	0	0	24	10	7	0	17	29	0	0	46	0	0	0	53	12	38	52	0	18	19	46	24	26	23	19	39	0
ASV6971	Bacteria	Firmicutes	Bacilli	Bacillales	Planococcaceae	Lysinibacillus	NA	0.999072	0	0	0	0	0	0	7	0	0	13	0	0	0	0	0	0	0	8	0	0	0	0	0	0	0	0	0	0	0	27	0	0	0	0	0	0	0	19	0	16	0
ASV8679	Bacteria	Firmicutes	Bacilli	Bacillales	Planococcaceae	Lysinibacillus	NA	0.999259	0	0	0	0	0	0	0	0	0	0	0	11	19	0	0	0	35	0	0	0	0	0	12	0	0	0	0	0	0	0	22	0	0	0	0	0	0	0	0	0	0
ASV165	Bacteria	Firmicutes	Bacilli	Bacillales	Planococcaceae	Paenisporosarcina	NA	0.98549	27	21	12	0	19	29	39	0	118	4	0	0	45	12	6	66	41	9	0	14	15	9	4	52	0	0	0	51	12	0	49	0	36	42	32	22	21	11	0	45	0
ASV9203	Bacteria	Firmicutes	Bacilli	Bacillales	Planococcaceae	NA	NA	0.998822	0	0	0	0	0	0	0	0	0	0	0	0	9	0	0	0	0	0	0	17	0	11	0	0	0	0	0	0	17	0	16	0	0	0	17	13	0	0	0	0	0
ASV1298	Bacteria	Firmicutes	Bacilli	Bacillales	Bacillaceae	Fictibacillus	NA	0.99983	4	23	5	11	33	22	41	17	29	11	14	10	16	17	9	9	7	13	6	17	21	16	5	26	0	13	11	14	14	24	7	3	5	43	16	5	29	26	10	0	22
ASV29	Bacteria	Firmicutes	Bacilli	Bacillales	Bacillaceae	Bacillus	Bacillus_funiculus	0.992392	66	151	5	11	37	231	203	188	262	35	6	13	154	42	16	126	102	193	10	160	192	53	24	168	0	8	11	212	170	190	221	14	99	120	174	116	99	108	60	87	27
ASV6684	Bacteria	Firmicutes	Bacilli	Bacillales	Bacillaceae	Bacillus	Bacillus_funiculus	0.986301	0	0	0	0	0	0	20	0	0	0	0	0	0	0	0	0	0	31	0	0	32	0	0	0	0	0	0	0	26	26	0	0	18	0	0	0	0	0	0	0	0
ASV1677	Bacteria	Firmicutes	Bacilli	Bacillales	Bacillaceae	Bacillus	NA	0.999936	0	26	32	53	178	17	61	0	39	44	27	41	16	93	31	18	18	0	54	16	21	103	58	27	19	16	109	30	25	53	19	13	0	0	44	23	0	14	24	18	80
ASV1646	Bacteria	Firmicutes	Bacilli	Bacillales	Bacillaceae	Bacillus	NA	0.999101	0	30	11	21	53	52	60	57	30	28	0	16	29	47	23	0	0	62	18	59	48	53	32	29	17	12	15	39	68	51	0	13	0	14	0	0	25	34	31	0	40
ASV1602	Bacteria	Firmicutes	Bacilli	Bacillales	Bacillaceae	Bacillus	NA	0.998081	0	41	0	0	0	0	62	30	34	0	0	0	0	0	0	18	0	23	0	30	49	0	0	0	0	0	0	0	0	66	24	0	0	0	21	0	25	48	0	0	0
ASV193	Bacteria	Firmicutes	Bacilli	Bacillales	Bacillaceae	Bacillus	NA	0.998619	25	127	17	40	112	150	221	113	119	37	29	45	72	113	45	76	29	81	31	108	223	96	18	130	11	12	31	139	141	341	46	20	47	33	107	59	110	166	72	41	68
ASV6353	Bacteria	Firmicutes	Bacilli	Bacillales	Bacillaceae	Bacillus	NA	0.998697	0	0	0	0	0	33	19	0	24	0	0	0	20	0	0	0	0	20	0	0	28	0	0	29	0	0	0	0	34	24	0	0	0	10	11	0	13	13	0	14	0
ASV45	Bacteria	Firmicutes	Bacilli	Bacillales	Bacillaceae	Bacillus	NA	0.999892	47	437	11	36	67	431	572	267	306	30	31	23	138	46	17	154	60	237	28	371	512	57	24	219	0	0	26	205	398	865	121	17	110	135	172	95	233	399	116	68	49
ASV112	Bacteria	Firmicutes	Bacilli	Bacillales	Bacillaceae	Bacillus	NA	0.995189	32	0	0	0	0	24	50	25	36	0	0	0	31	0	0	53	33	19	0	33	28	0	0	30	0	0	0	37	35	0	42	0	41	0	0	0	26	50	0	44	0
ASV436	Bacteria	Firmicutes	Bacilli	Bacillales	Bacillaceae	Bacillus	NA	0.998373	16	34	43	47	119	46	348	58	104	79	38	74	87	99	64	50	44	38	74	28	53	83	78	38	19	26	84	46	67	81	130	18	20	26	57	57	96	58	41	41	105
ASV1334	Bacteria	Firmicutes	Bacilli	Bacillales	Bacillaceae	Bacillus	NA	0.97546	4	0	0	0	0	0	17	0	0	0	0	0	0	0	0	15	7	0	0	0	22	0	0	0	0	0	0	16	5	23	12	0	0	0	10	0	20	14	7	8	0
ASV101	Bacteria	Firmicutes	Bacilli	Bacillales	Bacillaceae	Bacillus	NA	0.995058	34	51	0	0	0	49	71	0	39	0	0	0	45	0	0	42	0	0	0	0	59	0	0	70	0	0	0	69	0	100	43	0	0	28	58	35	58	38	0	17	0
ASV280	Bacteria	Firmicutes	Bacilli	Bacillales	Bacillaceae	Bacillus	NA	0.983445	22	60	0	0	32	107	70	72	102	0	0	0	49	0	0	46	0	59	0	70	97	0	0	65	0	0	0	99	88	176	52	0	30	20	148	26	47	102	28	21	0
ASV10	Bacteria	Firmicutes	Bacilli	Bacillales	Bacillaceae	Bacillus	NA	0.995807	110	453	29	36	235	688	539	598	667	105	44	89	370	108	55	402	118	364	73	655	776	108	80	519	31	33	82	874	773	1040	392	14	162	220	1256	306	412	736	214	164	112
ASV5	Bacteria	Firmicutes	Bacilli	Bacillales	Bacillaceae	Bacillus	NA	0.979289	132	427	65	66	368	710	537	518	567	172	75	131	337	174	101	406	132	403	87	616	767	214	139	602	34	50	124	987	665	1203	419	36	193	225	1415	332	425	742	237	172	192
ASV1972	Bacteria	Firmicutes	Bacilli	Bacillales	Bacillaceae	Bacillus	Bacillus_benzoevorans	0.710651	0	14	0	0	0	0	27	0	0	0	0	21	0	0	0	0	0	0	0	0	0	0	0	0	0	0	0	0	0	30	0	0	0	0	25	0	15	0	26	18	0
ASV5687	Bacteria	Firmicutes	Bacilli	Bacillales	Bacillaceae	Bacillus	NA	0.993743	0	0	0	0	15	0	0	0	0	0	0	0	0	0	0	0	0	0	0	0	0	0	0	0	0	0	17	0	0	0	0	0	0	0	0	0	0	0	0	0	0
ASV4639	Bacteria	Firmicutes	Bacilli	Bacillales	Bacillaceae	Bacillus	NA	0.997055	0	0	0	33	48	36	40	53	0	19	0	0	0	43	0	42	41	40	0	0	67	40	20	0	0	0	0	0	47	75	0	0	0	0	0	0	36	61	41	0	33
ASV11920	Bacteria	Firmicutes	Bacilli	Bacillales	Bacillaceae	Bacillus	NA	0.994753	0	0	0	0	0	0	0	0	0	0	0	0	0	0	0	0	0	0	0	27	0	0	0	0	0	0	0	0	0	0	29	0	34	0	32	0	0	0	0	34	0
ASV136	Bacteria	Firmicutes	Bacilli	Bacillales	Bacillaceae	Bacillus	NA	0.999799	29	41	9	10	25	98	81	52	79	17	0	18	32	26	6	76	45	42	6	75	102	26	7	51	0	10	6	77	73	126	71	0	33	33	95	34	53	48	41	35	13
ASV5572	Bacteria	Firmicutes	Bacilli	Bacillales	Planococcaceae	Domibacillus	NA	0.991331	0	0	0	0	25	0	0	0	0	14	0	0	0	34	0	0	0	0	0	0	0	17	0	0	0	8	13	0	0	0	0	6	0	0	0	0	0	0	0	0	0
ASV1989	Bacteria	Firmicutes	Bacilli	Bacillales	Planococcaceae	Domibacillus	NA	0.995017	0	13	0	0	0	0	0	6	28	0	0	0	0	0	0	0	13	0	0	0	16	0	0	0	0	0	0	0	0	0	12	0	0	0	22	0	0	9	6	0	0
ASV653	Bacteria	Firmicutes	Bacilli	Bacillales	Bacillaceae	Bacillus	NA	0.999406	12	21	0	0	0	41	50	33	48	0	0	0	38	0	0	19	17	33	0	37	35	0	0	34	0	0	0	36	48	47	23	0	16	8	46	17	44	43	21	19	0
ASV690	Bacteria	Firmicutes	Bacilli	Bacillales	Bacillaceae	Bacillus	NA	0.999234	11	20	0	0	0	0	0	9	0	0	0	0	0	0	0	8	8	0	0	0	0	0	0	16	0	0	0	13	0	21	12	0	11	34	0	9	13	23	0	0	0
ASV3278	Bacteria	Firmicutes	Bacilli	Bacillales	Bacillaceae	Bacillus	NA	0.998889	0	0	22	31	68	12	9	0	0	18	20	34	0	63	36	11	0	0	22	0	9	68	30	15	15	14	45	12	0	17	0	17	0	0	26	0	15	8	0	0	49
ASV5570	Bacteria	Firmicutes	Bacilli	Bacillales	Bacillaceae	Bacillus	NA	0.999831	0	0	0	0	25	0	0	0	21	21	0	21	0	18	0	0	0	39	16	0	0	18	0	0	0	0	0	0	0	0	0	0	0	0	0	0	0	0	0	0	67
ASV2094	Bacteria	Firmicutes	Bacilli	Bacillales	Bacillaceae	Bacillus	NA	0.99958	0	11	0	0	17	28	20	9	0	0	0	0	13	18	0	23	9	0	0	10	13	0	9	0	0	7	0	12	12	15	11	0	7	6	16	4	0	49	0	13	23
ASV185	Bacteria	Firmicutes	Bacilli	Bacillales	Bacillaceae	Bacillus	NA	0.966927	26	0	0	0	9	31	44	0	49	0	0	0	32	0	0	46	24	0	7	24	0	0	0	51	0	0	0	48	15	0	0	0	33	13	43	22	0	0	0	0	0
ASV6340	Bacteria	Firmicutes	Bacilli	Bacillales	Bacillaceae	Bacillus	NA	0.992888	0	0	0	0	0	38	31	0	28	0	0	0	0	0	0	23	0	0	0	0	24	0	0	0	0	0	0	0	34	0	0	0	0	23	0	0	0	27	0	22	0
ASV1822	Bacteria	Firmicutes	Bacilli	Bacillales	Bacillaceae	Bacillus	NA	0.998573	0	18	0	0	0	19	27	24	24	0	0	0	27	0	0	21	20	22	0	29	0	0	0	11	0	0	0	21	27	22	24	0	0	0	26	0	17	23	16	16	0
ASV3950	Bacteria	Firmicutes	Bacilli	Bacillales	Bacillaceae	Bacillus	NA	0.985287	0	0	8	11	22	0	0	0	0	13	0	17	0	29	8	0	0	0	13	0	0	19	21	0	0	0	0	0	0	0	0	0	0	0	0	0	0	0	0	0	14
ASV224	Bacteria	Firmicutes	Bacilli	Bacillales	Bacillaceae	Bacillus	NA	0.996314	24	42	0	0	0	45	67	46	51	0	0	0	29	10	0	57	36	39	3	27	48	0	0	27	0	0	0	33	57	62	37	0	17	32	27	14	42	60	42	37	0
ASV6389	Bacteria	Firmicutes	Bacilli	Bacillales	Bacillaceae	Bacillus	NA	0.967171	0	0	0	0	0	20	0	0	0	0	0	0	0	0	0	0	0	0	0	0	0	26	0	28	0	0	0	0	0	0	0	0	0	0	0	15	0	0	0	0	0
ASV1586	Bacteria	Firmicutes	Bacilli	Bacillales	Bacillaceae	Bacillus	NA	0.976611	0	47	0	0	0	0	110	34	0	0	0	0	0	0	0	41	0	0	0	0	62	0	0	0	0	0	0	0	0	81	46	0	0	0	0	0	84	56	64	44	0
ASV108	Bacteria	Firmicutes	Bacilli	Bacillales	Bacillaceae	Bacillus	NA	0.967351	33	0	9	0	0	0	0	0	42	0	0	42	0	21	0	22	0	0	0	0	0	0	0	0	0	0	0	0	18	0	0	0	0	22	0	0	0	0	0	0	0
ASV4745	Bacteria	Firmicutes	Bacilli	Bacillales	Bacillaceae	Bacillus	NA	0.994221	0	0	0	18	54	0	0	0	0	19	0	18	0	52	12	0	0	0	22	0	0	34	19	0	0	0	0	0	0	44	0	0	0	0	0	0	0	0	0	0	31
ASV19	Bacteria	Firmicutes	Bacilli	Bacillales	Bacillaceae	Bacillus	NA	0.993922	79	201	49	37	82	346	378	187	263	50	0	47	134	83	0	250	130	193	31	206	293	50	57	187	0	0	68	190	255	394	165	29	93	71	265	87	246	245	196	142	56
ASV20	Bacteria	Firmicutes	Bacilli	Bacillales	Bacillaceae	Bacillus	NA	0.994919	77	184	0	0	71	299	364	191	211	39	42	38	109	71	43	236	130	183	31	179	323	49	0	161	19	36	0	152	203	416	193	0	77	92	222	90	225	232	221	145	39
ASV1702	Bacteria	Firmicutes	Bacilli	Bacillales	Bacillaceae	Bacillus	Bacillus_asahii	0.725275	0	24	0	0	16	52	0	26	0	0	0	0	36	21	0	0	0	21	7	26	38	0	0	50	0	0	0	56	34	63	38	0	0	13	57	21	42	45	28	38	0
ASV2113	Bacteria	Firmicutes	Bacilli	Bacillales	Bacillaceae	Bacillus	NA	0.996591	0	11	0	0	0	0	39	0	0	0	0	0	0	0	0	25	0	0	0	0	11	0	0	0	0	0	0	4	0	38	25	0	0	0	8	0	29	27	0	33	0
ASV5083	Bacteria	Firmicutes	Bacilli	Bacillales	Bacillaceae	Bacillus	NA	0.999927	0	0	0	7	26	5	0	0	0	16	5	18	0	24	26	13	0	0	12	0	2	13	4	2	4	9	7	0	0	3	0	5	0	2	0	2	0	7	0	2	38
ASV525	Bacteria	Firmicutes	Bacilli	Bacillales	Bacillaceae	Bacillus	Bacillus_timonensis	0.726494	14	0	0	0	0	0	22	15	32	0	0	0	13	0	0	24	0	16	0	12	27	0	0	15	0	0	0	18	20	32	33	0	0	13	23	0	0	21	15	23	0
ASV6384	Bacteria	Firmicutes	Bacilli	Bacillales	Bacillaceae	Bacillus	NA	0.981227	0	0	0	0	0	21	0	0	24	0	0	0	0	0	0	0	0	0	0	0	29	0	0	0	0	0	0	0	0	34	0	0	0	0	0	0	0	0	0	0	0
ASV199	Bacteria	Firmicutes	Bacilli	Bacillales	Bacillaceae	Bacillus	NA	0.978773	25	86	0	0	11	142	129	65	107	15	14	17	62	8	0	59	38	76	0	74	120	10	8	77	0	0	7	94	72	153	68	5	50	41	118	41	76	105	52	41	10
ASV575	Bacteria	Firmicutes	Bacilli	Paenibacillales	Paenibacillaceae	Paenibacillus	NA	0.99765	13	0	0	0	0	15	0	0	0	0	0	0	17	0	0	0	0	0	0	0	0	0	0	10	0	0	0	0	12	0	0	0	0	0	0	0	0	0	0	0	0
ASV5584	Bacteria	Firmicutes	Bacilli	Paenibacillales	Paenibacillaceae	Paenibacillus	NA	0.999993	0	0	0	0	23	0	0	0	0	19	0	0	0	29	19	0	0	0	26	0	0	76	12	0	0	15	0	0	0	0	0	0	0	0	0	0	0	23	0	0	0
ASV1813	Bacteria	Firmicutes	Bacilli	Paenibacillales	Paenibacillaceae	Paenibacillus	NA	0.999958	0	18	9	13	29	0	0	0	21	0	0	13	0	0	0	15	0	0	0	0	0	0	0	0	0	0	0	16	0	0	0	0	0	0	12	0	0	0	0	0	17
ASV7365	Bacteria	Firmicutes	Bacilli	Paenibacillales	Paenibacillaceae	Paenibacillus	NA	0.999759	0	0	0	0	0	0	0	33	0	0	0	11	0	22	0	0	0	22	0	0	0	19	0	0	0	0	0	0	36	56	0	0	0	0	20	0	0	0	0	0	0
ASV9108	Bacteria	Firmicutes	Bacilli	Paenibacillales	Paenibacillaceae	Paenibacillus	NA	0.999781	0	0	0	0	0	0	0	0	0	0	0	0	36	0	0	0	0	0	0	40	0	0	0	0	0	0	0	29	0	0	0	0	16	0	0	0	0	0	0	0	0
ASV6350	Bacteria	Firmicutes	Bacilli	Paenibacillales	Paenibacillaceae	Paenibacillus	NA	0.999825	0	0	0	0	0	34	39	0	22	0	0	0	0	0	0	29	0	0	0	0	0	0	0	26	0	0	0	0	0	0	0	0	0	0	0	0	0	0	0	0	0
ASV16296	Bacteria	Firmicutes	Bacilli	Paenibacillales	Paenibacillaceae	Paenibacillus	NA	0.99902	0	0	0	0	0	0	0	0	0	0	0	0	0	0	0	0	0	0	0	0	0	0	0	0	0	0	0	0	0	0	0	0	0	0	0	0	14	0	26	0	0
ASV1876	Bacteria	Firmicutes	Bacilli	Bacillales	Bacillaceae	Bacillus	NA	0.995798	0	16	0	4	13	0	24	0	35	12	0	0	18	11	4	0	0	0	0	15	26	0	6	32	0	0	0	0	0	45	20	0	0	39	0	13	21	0	0	11	26
ASV1095	Bacteria	Firmicutes	Bacilli	Bacillales	Bacillaceae	Bacillus	NA	0.994017	6	0	0	0	0	28	0	20	0	0	0	0	0	0	0	16	0	19	0	0	0	0	0	0	0	0	0	44	28	0	0	0	0	0	51	0	0	46	15	0	0
ASV5195	Bacteria	Firmicutes	Bacilli	Bacillales	Bacillaceae	Bacillus	NA	0.999951	0	0	0	6	30	0	0	0	0	25	0	16	0	15	13	0	0	0	14	0	0	18	26	0	0	12	5	0	0	0	0	0	0	0	0	0	0	0	0	0	14
ASV3208	Bacteria	Acidobacteriota	Thermoanaerobaculia	Thermoanaerobaculales	Thermoanaerobaculaceae	Subgroup_10	uncultured_bacterium_g__Subgroup_10	0.80679	0	0	26	17	14	0	0	0	0	8	0	12	0	20	11	0	0	0	31	0	0	4	22	0	0	8	8	13	0	0	0	14	0	10	9	0	0	0	0	0	13
ASV2219	Bacteria	Acidobacteriota	Thermoanaerobaculia	Thermoanaerobaculales	Thermoanaerobaculaceae	Subgroup_10	uncultured_bacterium_g__Subgroup_10	0.813593	0	9	0	0	0	9	17	5	25	0	0	0	13	0	0	26	19	8	0	8	13	0	0	0	0	0	0	0	16	15	16	0	11	0	0	0	18	13	0	18	0
ASV2127	Bacteria	Acidobacteriota	Thermoanaerobaculia	Thermoanaerobaculales	Thermoanaerobaculaceae	Subgroup_10	NA	0.807211	0	10	4	0	0	0	5	7	10	0	0	4	0	0	2	12	9	6	3	0	9	0	0	7	0	0	0	14	9	15	7	0	4	0	6	6	8	10	8	10	0
ASV861	Bacteria	Acidobacteriota	Subgroup_25	norank_c__Subgroup_25	norank_o__norank_c__Subgroup_25	norank_f__norank_o__norank_c__Subgroup_25	uncultured_bacterium_g__norank_f__norank_o__norank_c__Subgroup_25	0.998347	8	16	0	0	0	0	16	5	23	0	0	0	13	0	0	22	18	16	0	26	27	0	0	24	0	0	0	10	12	17	19	0	7	6	3	6	44	31	7	11	0
ASV3014	Bacteria	Acidobacteriota	Subgroup_25	norank_c__Subgroup_25	norank_o__norank_c__Subgroup_25	norank_f__norank_o__norank_c__Subgroup_25	uncultured_Acidobacteria_bacterium_g__norank_f__norank_o__norank_c__Subgroup_25	0.783773	0	0	62	53	63	0	0	0	0	25	9	68	0	31	36	0	0	0	109	0	0	76	30	0	57	42	14	0	0	0	0	33	0	0	0	0	7	0	0	0	45
ASV662	Bacteria	Acidobacteriota	Vicinamibacteria	Subgroup_17	norank_o__Subgroup_17	norank_f__norank_o__Subgroup_17	NA	0.999999	11	12	0	0	0	0	0	0	14	0	0	0	15	0	0	0	12	0	0	10	0	0	0	0	0	0	0	9	0	0	19	0	9	0	0	12	13	0	0	12	0
ASV3536	Bacteria	Acidobacteriota	Vicinamibacteria	Subgroup_17	norank_o__Subgroup_17	norank_f__norank_o__Subgroup_17	NA	1	0	0	15	7	12	0	0	0	0	12	0	0	0	0	0	0	6	0	11	0	0	12	0	0	0	0	0	0	0	0	0	11	0	0	0	0	0	0	0	0	13
ASV3434	Bacteria	Acidobacteriota	Vicinamibacteria	Subgroup_17	norank_o__Subgroup_17	norank_f__norank_o__Subgroup_17	uncultured_bacterium_g__norank_f__norank_o__Subgroup_17	0.865732	0	0	17	30	36	0	0	4	0	33	12	53	0	17	25	5	3	0	32	0	4	31	14	5	27	34	10	0	2	5	9	53	0	0	2	0	0	4	0	0	24
ASV200	Bacteria	Acidobacteriota	Vicinamibacteria	Subgroup_17	norank_o__Subgroup_17	norank_f__norank_o__Subgroup_17	NA	1	25	0	0	0	0	0	0	0	23	0	0	0	0	0	0	22	0	0	0	25	19	0	0	20	0	0	0	0	0	0	0	0	0	0	0	0	0	27	0	17	0
ASV4671	Bacteria	Acidobacteriota	Vicinamibacteria	Subgroup_17	norank_o__Subgroup_17	norank_f__norank_o__Subgroup_17	NA	1	0	0	0	26	0	0	0	0	0	22	0	0	0	0	34	0	23	0	21	0	0	17	16	0	0	0	15	11	0	0	24	14	17	0	0	34	34	0	13	0	0
ASV11231	Bacteria	Acidobacteriota	Vicinamibacteria	Subgroup_17	norank_o__Subgroup_17	norank_f__norank_o__Subgroup_17	NA	1	0	0	0	0	0	0	0	0	0	0	0	0	0	0	0	0	0	19	0	10	0	0	0	15	0	0	0	0	0	0	0	0	0	0	0	10	0	0	0	0	0
ASV6457	Bacteria	Acidobacteriota	Vicinamibacteria	Subgroup_17	norank_o__Subgroup_17	norank_f__norank_o__Subgroup_17	NA	1	0	0	0	0	0	10	0	0	0	0	0	0	0	0	0	17	20	0	0	0	0	0	0	0	0	0	0	0	0	0	0	0	0	0	0	0	0	0	0	0	0
ASV930	Bacteria	Acidobacteriota	Vicinamibacteria	Subgroup_17	norank_o__Subgroup_17	norank_f__norank_o__Subgroup_17	NA	1	8	33	0	0	0	0	16	10	0	0	0	0	11	0	0	0	19	13	0	0	0	0	0	4	0	0	0	0	4	17	8	0	0	0	0	6	25	19	0	0	0
ASV7657	Bacteria	Acidobacteriota	Vicinamibacteria	Subgroup_17	norank_o__Subgroup_17	norank_f__norank_o__Subgroup_17	NA	1	0	0	0	0	0	0	0	0	19	0	0	0	0	0	0	8	0	0	0	13	15	0	0	0	0	0	0	0	0	0	0	0	8	0	0	0	0	0	0	8	0
ASV1817	Bacteria	Acidobacteriota	Vicinamibacteria	Subgroup_9	norank_o__Subgroup_9	norank_f__norank_o__Subgroup_9	uncultured_bacterium_g__norank_f__norank_o__Subgroup_9	0.718918	0	18	0	0	0	5	14	14	0	0	0	0	0	0	0	18	13	15	0	16	19	0	0	12	0	0	0	3	17	16	12	0	7	0	0	0	27	21	0	10	0
ASV610	Bacteria	Acidobacteriota	Vicinamibacteria	Subgroup_9	norank_o__Subgroup_9	norank_f__norank_o__Subgroup_9	uncultured_bacterium_g__norank_f__norank_o__Subgroup_9	0.811225	12	0	0	0	0	0	0	0	7	0	0	0	8	0	0	0	0	0	0	0	0	0	0	0	0	0	0	0	0	0	0	0	0	0	0	0	0	0	0	0	0
ASV432	Bacteria	Fibrobacterota	Fibrobacteria	Fibrobacterales	Fibrobacteraceae	possible_genus_04	Juncus_effusus_g__possible_genus_04	0.92796	16	39	0	0	7	16	14	21	20	0	0	0	12	0	0	0	32	24	0	42	45	0	0	36	0	0	0	15	15	41	25	0	18	27	10	14	36	23	8	10	0
ASV1719	Bacteria	Fibrobacterota	Fibrobacteria	Fibrobacterales	Fibrobacteraceae	possible_genus_04	uncultured_bacterium_g__possible_genus_04	0.995533	0	23	17	0	0	0	9	0	0	8	0	13	0	10	0	32	22	0	0	0	19	0	0	0	0	0	8	0	0	0	17	0	0	9	0	0	12	14	7	14	0
ASV717	Bacteria	Gemmatimonadota	AKAU4049	norank_c__AKAU4049	norank_o__norank_c__AKAU4049	norank_f__norank_o__norank_c__AKAU4049	uncultured_bacterium_g__norank_f__norank_o__norank_c__AKAU4049	0.999754	10	10	0	0	0	0	13	10	12	0	0	0	8	0	0	23	15	11	0	18	14	0	0	13	0	0	0	2	14	20	14	0	5	5	0	15	24	22	0	6	0
ASV1836	Bacteria	Gemmatimonadota	AKAU4049	norank_c__AKAU4049	norank_o__norank_c__AKAU4049	norank_f__norank_o__norank_c__AKAU4049	uncultured_soil_bacterium_g__norank_f__norank_o__norank_c__AKAU4049	0.96416	0	17	0	0	0	0	12	0	23	0	0	0	16	0	0	18	14	0	0	0	14	0	0	21	0	0	0	13	0	22	22	0	0	13	0	17	21	16	0	0	0
ASV4928	Bacteria	Gemmatimonadota	AKAU4049	norank_c__AKAU4049	norank_o__norank_c__AKAU4049	norank_f__norank_o__norank_c__AKAU4049	NA	1	0	0	0	10	0	0	0	0	0	0	0	7	0	0	0	0	0	0	0	0	0	0	0	0	0	0	0	0	0	0	0	0	0	15	0	0	0	0	0	0	0
ASV157	Bacteria	Gemmatimonadota	AKAU4049	norank_c__AKAU4049	norank_o__norank_c__AKAU4049	norank_f__norank_o__norank_c__AKAU4049	NA	1	28	0	0	0	0	2	13	22	0	0	0	0	0	0	0	32	0	28	0	42	34	0	0	0	0	7	0	0	22	17	0	0	13	0	0	20	18	0	10	0	0
ASV1245	Bacteria	Entotheonellaeota	Entotheonellia	Entotheonellales	Entotheonellaceae	norank_f__Entotheonellaceae	uncultured_bacterium_g__norank_f__Entotheonellaceae	0.944023	4	11	0	0	0	6	28	6	9	0	0	0	12	0	0	9	6	12	0	10	11	0	0	10	0	0	0	14	16	19	9	0	8	3	0	10	14	6	8	4	0
ASV4748	Bacteria	Entotheonellaeota	Entotheonellia	Entotheonellales	Entotheonellaceae	Candidatus_Entotheonella	NA	1	0	0	0	17	0	0	0	13	0	10	2	0	0	24	6	0	0	0	0	0	0	10	11	0	6	6	11	0	0	0	0	7	0	15	0	0	0	0	0	0	0
ASV1650	Bacteria	Entotheonellaeota	Entotheonellia	Entotheonellales	Entotheonellaceae	Candidatus_Entotheonella	uncultured_delta_proteobacterium_g__Candidatus_Entotheonella	0.873016	0	29	17	0	14	21	43	0	24	0	0	0	24	0	0	38	8	16	10	23	25	0	0	29	0	0	0	21	26	28	21	0	13	0	13	12	44	23	21	14	11
ASV2032	Bacteria	Methylomirabilota	Methylomirabilia	Rokubacteriales	WX65	norank_f__WX65	uncultured_bacterium_g__norank_f__WX65	0.882721	0	12	0	0	0	0	13	23	15	0	0	0	11	0	0	14	8	0	0	0	0	0	0	0	0	0	0	0	0	12	9	0	7	0	0	0	14	0	0	0	0
ASV406	Bacteria	Methylomirabilota	Methylomirabilia	Rokubacteriales	WX65	norank_f__WX65	NA	1	17	34	0	0	0	0	44	0	0	0	0	0	0	0	0	0	17	0	0	0	17	0	0	0	0	0	0	0	0	31	24	0	23	0	0	0	28	28	0	15	0
ASV3310	Bacteria	Methylomirabilota	Methylomirabilia	Rokubacteriales	norank_o__Rokubacteriales	norank_f__norank_o__Rokubacteriales	NA	1	0	0	21	17	19	0	0	0	0	0	0	21	0	16	0	0	0	0	29	0	0	17	10	0	0	0	15	0	0	0	0	10	0	0	0	0	0	0	0	0	0
ASV3522	Bacteria	Methylomirabilota	Methylomirabilia	Rokubacteriales	norank_o__Rokubacteriales	norank_f__norank_o__Rokubacteriales	uncultured_bacterium_g__norank_f__norank_o__Rokubacteriales	0.958783	0	0	15	11	23	0	0	0	0	17	0	25	0	20	0	0	0	0	19	0	0	14	18	0	5	9	16	0	0	0	0	7	0	0	0	0	0	0	0	0	16
ASV3274	Bacteria	Methylomirabilota	Methylomirabilia	Rokubacteriales	norank_o__Rokubacteriales	norank_f__norank_o__Rokubacteriales	uncultured_bacterium_g__norank_f__norank_o__Rokubacteriales	0.977375	0	0	22	10	17	3	0	0	0	7	8	7	0	18	7	0	0	6	18	0	0	9	47	0	0	10	0	0	0	0	0	0	0	0	0	0	0	0	0	0	13
ASV3126	Bacteria	Methylomirabilota	Methylomirabilia	Rokubacteriales	norank_o__Rokubacteriales	norank_f__norank_o__Rokubacteriales	uncultured_bacterium_g__norank_f__norank_o__Rokubacteriales	0.98411	0	0	32	24	18	0	0	0	0	15	0	30	0	32	16	0	0	0	51	0	0	26	61	15	29	20	10	0	0	0	0	27	0	0	5	0	0	0	0	0	22
ASV271	Bacteria	Methylomirabilota	Methylomirabilia	Rokubacteriales	norank_o__Rokubacteriales	norank_f__norank_o__Rokubacteriales	uncultured_bacterium_g__norank_f__norank_o__Rokubacteriales	0.97275	22	16	0	0	0	0	46	24	17	0	0	0	45	0	0	24	11	20	0	29	24	0	0	26	0	0	0	0	41	36	35	0	23	22	10	18	63	35	14	16	0
ASV6361	Bacteria	Methylomirabilota	Methylomirabilia	Rokubacteriales	norank_o__Rokubacteriales	norank_f__norank_o__Rokubacteriales	uncultured_bacterium_g__norank_f__norank_o__Rokubacteriales	0.97417	0	0	0	0	0	26	0	0	0	0	0	0	0	0	0	0	0	0	0	0	0	0	0	0	0	0	0	0	0	0	0	0	0	0	0	0	0	0	0	0	0
ASV1840	Bacteria	Methylomirabilota	Methylomirabilia	Rokubacteriales	norank_o__Rokubacteriales	norank_f__norank_o__Rokubacteriales	uncultured_bacterium_g__norank_f__norank_o__Rokubacteriales	0.715147	0	17	0	0	0	0	11	9	10	0	0	0	0	0	0	0	0	11	0	6	10	0	0	0	0	0	0	0	21	0	0	0	0	0	0	0	0	14	0	0	0
ASV4069	Bacteria	Methylomirabilota	Methylomirabilia	Rokubacteriales	norank_o__Rokubacteriales	norank_f__norank_o__Rokubacteriales	uncultured_bacterium_g__norank_f__norank_o__Rokubacteriales	0.761713	0	0	7	12	8	0	12	0	0	5	3	0	0	7	5	0	11	0	7	8	0	4	7	13	8	8	11	0	0	11	0	0	0	0	0	0	7	0	11	0	10
ASV197	Bacteria	Methylomirabilota	Methylomirabilia	Rokubacteriales	norank_o__Rokubacteriales	norank_f__norank_o__Rokubacteriales	uncultured_bacterium_g__norank_f__norank_o__Rokubacteriales	0.936115	25	29	0	0	0	16	55	14	37	0	0	0	64	0	0	36	42	21	0	33	50	0	0	34	0	0	0	34	31	64	48	0	30	23	11	36	75	51	24	25	0
ASV1895	Bacteria	Methylomirabilota	Methylomirabilia	Rokubacteriales	norank_o__Rokubacteriales	norank_f__norank_o__Rokubacteriales	uncultured_bacterium_g__norank_f__norank_o__Rokubacteriales	0.952981	0	16	0	0	0	24	26	23	28	0	0	0	0	0	0	29	20	24	0	32	26	0	0	0	0	0	0	0	39	16	17	0	0	18	0	0	38	28	16	0	0
ASV3727	Bacteria	Methylomirabilota	Methylomirabilia	Rokubacteriales	norank_o__Rokubacteriales	norank_f__norank_o__Rokubacteriales	uncultured_bacterium_g__norank_f__norank_o__Rokubacteriales	0.970789	0	0	11	18	18	0	0	0	0	0	0	0	0	25	0	10	0	0	24	0	0	13	12	0	14	0	8	0	0	0	0	21	0	0	0	0	0	0	0	0	15
ASV3372	Bacteria	Methylomirabilota	Methylomirabilia	Rokubacteriales	norank_o__Rokubacteriales	norank_f__norank_o__Rokubacteriales	NA	1	0	0	19	0	22	0	0	0	0	0	0	13	0	0	0	0	0	0	19	0	0	16	30	0	23	0	0	0	0	0	0	0	0	0	0	0	0	0	0	0	0
ASV9459	Bacteria	Methylomirabilota	Methylomirabilia	Rokubacteriales	norank_o__Rokubacteriales	norank_f__norank_o__Rokubacteriales	NA	1	0	0	0	0	0	0	0	0	0	0	0	0	0	28	0	0	0	0	29	0	0	0	0	0	0	27	0	0	0	0	0	25	0	0	0	0	0	0	0	0	28
ASV454	Bacteria	Acidobacteriota	Blastocatellia	DS-100	norank_o__DS-100	norank_f__norank_o__DS-100	uncultured_bacterium_g__norank_f__norank_o__DS-100	0.860186	16	0	0	0	0	0	0	0	14	0	0	0	8	0	0	14	13	0	0	10	14	0	0	0	0	0	0	0	0	9	17	0	3	0	0	0	9	11	0	0	0
ASV1933	Bacteria	Acidobacteriota	Blastocatellia	DS-100	norank_o__DS-100	norank_f__norank_o__DS-100	uncultured_bacterium_g__norank_f__norank_o__DS-100	0.757811	0	15	21	18	16	0	0	0	0	10	11	21	0	12	15	0	0	0	18	0	0	0	0	10	12	0	0	9	0	0	0	19	0	0	0	0	0	0	0	0	11
ASV433	Bacteria	Acidobacteriota	Blastocatellia	DS-100	norank_o__DS-100	norank_f__norank_o__DS-100	uncultured_bacterium_g__norank_f__norank_o__DS-100	0.823845	16	18	11	4	0	5	9	0	17	8	0	10	8	0	0	20	13	20	10	23	31	0	0	18	5	0	0	12	18	13	24	0	11	13	0	21	22	37	10	9	0
ASV4097	Bacteria	Acidobacteriota	Blastocatellia	2024-11-24	norank_o__11-24	norank_f__norank_o__11-24	NA	0.999964	0	0	6	3	3	0	8	0	0	0	4	0	0	0	0	6	7	15	12	0	0	0	0	12	2	0	0	0	0	0	10	5	0	0	0	10	0	10	6	12	4
ASV309	Bacteria	Acidobacteriota	Blastocatellia	2024-11-24	norank_o__11-24	norank_f__norank_o__11-24	uncultured_bacterium_g__norank_f__norank_o__11-24	0.941639	20	4	0	0	0	0	0	5	8	0	0	0	0	0	0	28	32	6	0	6	3	0	0	0	0	0	0	0	6	2	7	0	10	0	0	8	7	4	5	9	0
ASV3464	Bacteria	Acidobacteriota	Blastocatellia	2024-11-24	norank_o__11-24	norank_f__norank_o__11-24	uncultivated_soil_bacterium_clone_S111	0.975951	0	0	16	13	21	0	0	0	0	5	0	5	0	7	4	0	0	0	26	0	0	8	14	0	12	7	5	0	0	0	0	18	0	0	0	0	0	0	0	0	4
ASV337	Bacteria	Acidobacteriota	Blastocatellia	2024-11-24	norank_o__11-24	norank_f__norank_o__11-24	uncultivated_soil_bacterium_clone_S111	0.981505	19	0	0	0	0	0	0	0	0	0	0	0	0	0	0	32	24	0	0	0	0	0	0	27	0	0	0	9	0	15	21	0	0	0	0	0	0	0	0	16	0
ASV2099	Bacteria	Acidobacteriota	Blastocatellia	2024-11-24	norank_o__11-24	norank_f__norank_o__11-24	uncultivated_soil_bacterium_clone_S111	0.961942	0	11	0	0	0	0	9	0	0	0	0	0	15	0	0	0	0	20	0	26	13	0	0	0	0	0	0	0	0	0	0	0	0	0	0	0	21	29	0	0	0
ASV1623	Bacteria	Acidobacteriota	Acidobacteriae	PAUC26f	norank_o__PAUC26f	norank_f__norank_o__PAUC26f	uncultured_Acidobacteria_bacterium_g__norank_f__norank_o__PAUC26f	0.794084	0	34	0	0	0	0	11	11	0	0	0	0	11	0	0	17	12	9	0	11	13	0	0	7	0	0	0	2	17	9	0	0	10	17	0	2	15	20	18	0	0
ASV1039	Bacteria	Acidobacteriota	Acidobacteriae	PAUC26f	norank_o__PAUC26f	norank_f__norank_o__PAUC26f	uncultured_bacterium_g__norank_f__norank_o__PAUC26f	0.878569	6	20	0	0	0	11	56	16	16	0	0	0	21	0	0	17	6	9	0	19	21	0	0	11	0	0	0	4	23	12	6	0	9	23	5	0	26	13	20	8	0
ASV3386	Bacteria	Acidobacteriota	Acidobacteriae	Bryobacterales	Bryobacteraceae	Bryobacter	NA	0.893355	0	0	18	20	0	0	0	0	0	5	3	11	0	22	11	0	0	0	11	14	0	7	9	0	4	10	10	0	0	0	0	11	0	4	0	0	0	0	0	0	11
ASV1835	Bacteria	Acidobacteriota	Acidobacteriae	Bryobacterales	Bryobacteraceae	Bryobacter	NA	0.787861	0	17	0	0	0	0	19	9	8	0	0	0	13	0	0	19	6	11	0	0	10	0	0	9	0	0	0	4	12	16	6	0	7	0	0	9	14	0	10	5	0
ASV5681	Bacteria	Acidobacteriota	Acidobacteriae	Bryobacterales	Bryobacteraceae	Bryobacter	NA	0.980456	0	0	0	0	15	0	0	0	0	0	11	0	0	0	0	0	0	0	41	0	0	36	0	0	0	21	30	0	0	0	0	0	0	0	0	0	0	0	0	0	40
ASV3115	Bacteria	Acidobacteriota	Acidobacteriae	Bryobacterales	Bryobacteraceae	Bryobacter	NA	0.973478	0	0	33	0	0	0	0	0	0	0	0	0	0	0	0	0	0	0	0	0	0	0	38	0	0	0	0	0	0	0	0	0	0	0	0	0	0	0	0	0	0
ASV13855	Bacteria	Acidobacteriota	Acidobacteriae	Bryobacterales	Bryobacteraceae	Bryobacter	NA	0.978687	0	0	0	0	0	0	0	0	0	0	0	0	0	0	0	0	0	0	0	0	0	0	0	0	0	0	0	23	0	0	0	0	0	0	26	0	0	0	0	0	0
ASV426	Bacteria	Acidobacteriota	Acidobacteriae	Bryobacterales	Bryobacteraceae	Bryobacter	NA	0.983094	17	30	0	0	0	0	0	20	36	0	0	0	36	0	0	25	26	31	0	10	18	0	0	24	0	0	0	0	0	21	23	0	18	0	0	0	38	24	21	29	0
ASV5631	Bacteria	Acidobacteriota	Acidobacteriae	Bryobacterales	Bryobacteraceae	Bryobacter	NA	0.991633	0	0	0	0	18	0	0	0	0	0	0	28	0	20	24	0	0	0	0	0	0	0	0	0	0	0	0	0	0	0	0	0	0	0	0	0	0	0	0	0	13
ASV6387	Bacteria	Acidobacteriota	Acidobacteriae	Bryobacterales	Bryobacteraceae	Bryobacter	NA	0.991047	0	0	0	0	0	20	0	0	0	0	0	0	0	0	0	14	0	0	0	0	15	0	0	0	0	0	0	0	30	16	0	0	0	17	0	0	0	15	0	0	0
ASV5066	Bacteria	Acidobacteriota	Acidobacteriae	Bryobacterales	Bryobacteraceae	Bryobacter	NA	0.980848	0	0	0	8	14	22	0	0	0	12	10	21	0	15	0	0	0	0	8	0	12	9	29	0	17	17	9	0	0	7	0	18	0	0	0	11	14	0	14	0	27
ASV3112	Bacteria	Acidobacteriota	Acidobacteriae	Bryobacterales	Bryobacteraceae	Bryobacter	NA	0.978282	0	0	33	14	26	0	0	0	0	12	0	17	0	28	11	0	0	0	25	0	0	9	19	0	0	15	14	0	0	0	0	17	0	0	0	0	0	0	0	0	26
ASV3451	Bacteria	Acidobacteriota	Acidobacteriae	Bryobacterales	Bryobacteraceae	Bryobacter	NA	0.990931	0	0	17	0	0	0	0	0	0	0	0	0	0	0	0	0	0	0	14	0	0	0	17	0	9	0	0	0	0	0	0	0	0	0	0	0	0	0	0	0	0
ASV416	Bacteria	Acidobacteriota	Acidobacteriae	Bryobacterales	Bryobacteraceae	Bryobacter	NA	0.966489	17	16	0	0	0	19	15	19	26	0	0	0	0	0	0	14	0	30	0	20	19	0	0	0	0	0	0	0	20	0	20	0	16	0	0	0	0	17	26	0	0
ASV3429	Bacteria	Acidobacteriota	Acidobacteriae	Bryobacterales	Bryobacteraceae	Bryobacter	NA	0.97516	0	0	17	0	7	0	0	0	0	10	0	22	0	15	19	0	0	0	17	0	10	18	23	0	18	0	0	0	0	11	0	25	0	0	0	0	17	0	0	0	20
ASV13733	Bacteria	Acidobacteriota	Acidobacteriae	Bryobacterales	Bryobacteraceae	Bryobacter	NA	0.96335	0	0	0	0	0	0	0	0	0	0	0	0	0	0	0	0	0	0	0	0	0	0	0	0	0	0	12	22	0	0	0	0	0	0	0	0	0	0	0	13	0
ASV4795	Bacteria	Acidobacteriota	Acidobacteriae	Bryobacterales	Bryobacteraceae	Bryobacter	NA	0.959562	0	0	0	15	0	0	0	0	0	0	0	0	25	24	0	0	0	0	15	0	0	0	0	0	0	18	19	0	0	0	0	0	0	0	0	0	0	0	0	0	0
ASV5832	Bacteria	Acidobacteriota	Acidobacteriae	Bryobacterales	Bryobacteraceae	Bryobacter	NA	0.934159	0	0	0	0	9	0	0	0	0	0	0	0	0	7	7	0	0	0	6	0	0	0	20	0	0	0	0	0	0	0	0	0	0	0	0	0	0	0	0	0	25
ASV3513	Bacteria	Acidobacteriota	Acidobacteriae	Bryobacterales	Bryobacteraceae	Bryobacter	NA	0.960022	0	0	15	18	16	0	0	0	0	11	14	5	0	33	9	0	0	0	29	0	0	12	16	0	8	15	12	0	0	0	0	0	0	0	0	0	0	0	0	0	19
ASV1942	Bacteria	Acidobacteriota	Acidobacteriae	Bryobacterales	Bryobacteraceae	Bryobacter	NA	0.985214	0	15	0	0	0	8	0	0	0	0	0	0	0	0	0	0	0	0	0	10	0	0	0	13	0	0	0	14	13	0	11	0	12	14	0	0	22	0	0	0	0
ASV2070	Bacteria	Acidobacteriota	Acidobacteriae	Bryobacterales	Bryobacteraceae	Bryobacter	NA	0.98836	0	12	0	53	40	0	0	0	38	17	0	62	0	55	19	18	12	14	22	0	24	30	23	11	0	17	66	22	19	0	13	53	0	29	0	0	13	23	21	0	61
ASV3095	Bacteria	Acidobacteriota	Acidobacteriae	Bryobacterales	Bryobacteraceae	Bryobacter	NA	0.990918	0	0	36	0	0	0	0	0	0	0	0	0	0	14	0	0	0	0	0	0	0	11	21	0	0	17	0	0	0	0	0	0	0	0	0	0	0	0	0	0	28
ASV10153	Bacteria	Acidobacteriota	Acidobacteriae	Bryobacterales	Bryobacteraceae	Bryobacter	NA	0.990297	0	0	0	0	0	0	0	0	0	0	0	0	0	0	0	24	0	0	0	0	0	0	0	13	0	0	0	17	0	12	14	0	0	0	0	10	34	0	0	0	0
ASV8581	Bacteria	Acidobacteriota	Acidobacteriae	Bryobacterales	Bryobacteraceae	Bryobacter	NA	0.988322	0	0	0	0	0	0	0	0	0	0	0	28	0	26	0	0	0	0	25	0	0	21	0	0	0	0	0	0	0	0	0	18	0	0	0	0	0	0	0	0	0
ASV51	Bacteria	Acidobacteriota	Acidobacteriae	Bryobacterales	Bryobacteraceae	Bryobacter	NA	0.991748	45	15	0	0	0	0	30	0	0	0	0	0	0	0	0	0	36	33	0	0	30	0	0	0	0	0	0	0	51	35	0	0	0	0	0	0	0	32	39	0	0
ASV3004	Bacteria	Acidobacteriota	Acidobacteriae	Bryobacterales	Bryobacteraceae	Bryobacter	NA	0.993215	0	0	80	23	48	45	0	45	0	31	40	20	41	93	44	33	17	0	40	39	9	43	36	33	44	40	21	42	0	0	47	19	30	0	56	34	0	12	16	37	68
ASV1641	Bacteria	Acidobacteriota	Acidobacteriae	Bryobacterales	Bryobacteraceae	Bryobacter	NA	0.993074	0	30	0	0	0	0	22	0	0	0	0	0	0	0	0	35	0	12	0	0	0	0	0	0	0	0	0	0	0	0	0	0	0	0	0	0	0	14	13	0	0
ASV878	Bacteria	Acidobacteriota	Acidobacteriae	Bryobacterales	Bryobacteraceae	Bryobacter	NA	0.977407	8	20	0	0	0	11	32	9	24	0	0	0	19	0	0	15	15	17	0	28	10	0	0	7	0	0	0	9	41	9	16	0	17	12	5	10	18	17	25	16	0
ASV3326	Bacteria	Acidobacteriota	Acidobacteriae	Bryobacterales	Bryobacteraceae	Bryobacter	NA	0.977793	0	0	21	0	39	0	0	0	0	9	19	24	0	25	0	0	0	0	0	0	0	14	27	0	0	0	19	0	0	0	0	0	0	0	0	0	0	0	0	0	45
ASV3007	Bacteria	Acidobacteriota	Acidobacteriae	Bryobacterales	Bryobacteraceae	Bryobacter	NA	0.988065	0	0	70	53	31	0	0	0	0	23	0	36	0	71	34	0	0	0	54	0	0	37	46	0	40	37	31	0	0	0	0	55	0	0	0	0	0	0	0	0	56
ASV6444	Bacteria	Acidobacteriota	Acidobacteriae	Bryobacterales	Bryobacteraceae	Bryobacter	NA	0.989965	0	0	0	0	0	11	10	0	0	0	0	0	0	0	0	17	12	10	0	0	7	0	0	6	0	0	0	4	4	23	17	0	0	8	0	8	0	0	15	13	0
ASV6677	Bacteria	Acidobacteriota	Acidobacteriae	Bryobacterales	Bryobacteraceae	Bryobacter	uncultured_Solibacteraceae_bacterium_g__Bryobacter	0.716229	0	0	0	0	0	0	20	0	12	0	0	0	0	0	0	22	0	18	0	12	15	0	0	7	0	0	0	8	23	14	4	0	20	22	0	0	5	18	17	0	0
ASV1072	Bacteria	Acidobacteriota	Acidobacteriae	Bryobacterales	Bryobacteraceae	Bryobacter	NA	0.895389	6	9	0	0	0	6	0	5	7	0	0	0	13	0	0	10	9	7	0	8	0	0	0	20	0	0	0	0	14	4	5	0	0	0	0	5	5	7	8	5	0
ASV3570	Bacteria	Acidobacteriota	Acidobacteriae	Bryobacterales	Bryobacteraceae	Bryobacter	NA	0.99276	0	0	14	30	16	0	0	0	11	8	10	11	12	19	5	0	11	0	14	11	0	6	9	0	0	10	6	0	0	0	0	18	0	11	0	0	0	7	0	0	17
ASV521	Bacteria	Acidobacteriota	Acidobacteriae	Solibacterales	Solibacteraceae	Candidatus_Solibacter	uncultured_Solibacter_sp.	0.933944	14	28	5	0	0	22	25	9	14	4	0	8	7	11	0	28	12	15	5	11	15	0	0	9	0	2	0	7	22	22	7	9	7	19	4	6	16	26	18	15	10
ASV510	Bacteria	Acidobacteriota	Acidobacteriae	Solibacterales	Solibacteraceae	Candidatus_Solibacter	NA	0.959908	14	12	0	0	0	12	26	12	13	0	0	0	7	0	0	11	8	7	0	19	16	0	0	8	0	0	0	0	17	15	11	0	12	0	0	7	20	11	16	15	0
ASV570	Bacteria	Acidobacteriota	Acidobacteriae	Solibacterales	Solibacteraceae	Candidatus_Solibacter	NA	0.999351	13	0	0	0	0	0	0	0	17	0	0	0	19	0	0	0	18	15	12	0	0	0	0	21	0	0	0	14	0	8	0	0	0	0	0	6	13	14	14	0	20
ASV5689	Bacteria	Acidobacteriota	Acidobacteriae	Solibacterales	Solibacteraceae	Candidatus_Solibacter	NA	0.999443	0	0	0	0	14	0	18	0	0	0	13	0	0	20	0	30	0	0	0	10	0	0	0	0	0	0	0	0	22	0	0	0	0	0	10	0	0	0	0	0	0
ASV1697	Bacteria	Acidobacteriota	Acidobacteriae	Subgroup_2	norank_o__Subgroup_2	norank_f__norank_o__Subgroup_2	uncultured_bacterium_g__norank_f__norank_o__Subgroup_2	0.770599	0	24	0	0	0	4	11	3	5	0	0	0	5	0	0	6	10	13	0	15	9	0	0	0	0	0	0	0	0	6	0	0	0	0	0	0	25	14	0	4	0
ASV3220	Bacteria	Myxococcota	bacteriap25	norank_c__bacteriap25	norank_o__norank_c__bacteriap25	norank_f__norank_o__norank_c__bacteriap25	NA	0.997044	0	0	25	19	33	0	0	0	0	0	9	16	0	27	11	0	0	0	19	0	0	17	33	0	14	15	0	0	0	0	0	12	0	0	0	0	0	0	0	0	26
ASV3520	Bacteria	Myxococcota	bacteriap25	norank_c__bacteriap25	norank_o__norank_c__bacteriap25	norank_f__norank_o__norank_c__bacteriap25	uncultured_Syntrophobacterales_bacterium_g__norank_f__norank	0.914107	0	0	15	14	20	0	0	0	0	13	0	19	0	28	9	0	0	0	23	0	0	0	0	0	15	16	16	0	0	0	0	0	0	0	0	0	0	0	0	0	26
ASV3761	Bacteria	RCP2-54	norank_p__RCP2-54	norank_c__norank_p__RCP2-54	norank_o__norank_c__norank_p__RCP2-54	norank_f__norank_o__norank_c__norank_p__RCP2-54	uncultured_prokaryote_g__norank_f__norank_o__norank_c__norank_p__RCP2-54	0.896212	0	0	10	0	5	13	0	9	0	4	0	10	10	16	0	0	0	0	0	0	0	0	6	13	0	0	0	10	0	0	10	9	14	21	10	16	13	0	0	9	21
ASV1971	Bacteria	RCP2-54	norank_p__RCP2-54	norank_c__norank_p__RCP2-54	norank_o__norank_c__norank_p__RCP2-54	norank_f__norank_o__norank_c__norank_p__RCP2-54	uncultured_prokaryote_g__norank_f__norank_o__norank_c__norank_p__RCP2-54	0.918713	0	14	0	5	0	0	0	0	0	0	0	0	0	0	5	29	21	27	8	17	19	0	0	0	8	15	0	0	20	21	0	0	0	0	0	0	0	0	12	0	0
ASV1787	Bacteria	Desulfobacterota	norank_p__Desulfobacterota	norank_c__norank_p__Desulfobacterota	norank_o__norank_c__norank_p__Desulfobacterota	norank_f__norank_o__norank_c__norank_p__Desulfobacterota	uncultured_proteobacterium_g__norank_f__norank_o__norank_c__norank_p__Desulfobacterota	0.82688	0	19	10	10	8	9	19	8	17	0	0	0	6	8	5	20	15	16	11	10	12	0	18	13	8	3	0	17	12	23	0	0	10	5	6	5	19	7	8	12	7
ASV1037	Bacteria	Myxococcota	Polyangia	Nannocystales	Nannocystaceae	Nannocystis	metagenome_g__Nannocystis	0.824459	6	11	0	11	9	0	0	10	0	37	7	5	0	4	0	0	14	4	0	0	12	0	11	6	7	8	21	7	0	11	0	18	0	14	8	0	12	9	0	0	0
ASV356	Bacteria	Myxococcota	Polyangia	Nannocystales	Nannocystaceae	norank_f__Nannocystaceae	metagenome_g__norank_f__Nannocystaceae	0.957946	19	15	0	0	0	11	42	0	0	0	0	0	0	0	0	0	0	21	0	12	0	0	0	0	0	0	0	0	0	0	0	0	0	21	0	0	0	0	0	0	0
ASV594	Bacteria	Bdellovibrionota	Oligoflexia	0319-6G20	norank_o__0319-6G20	norank_f__norank_o__0319-6G20	NA	0.999991	12	0	5	0	0	0	16	0	12	0	0	0	4	0	0	11	13	2	0	0	2	0	7	2	0	0	0	8	0	11	17	6	0	47	0	4	0	6	0	5	0
ASV1122	Bacteria	Myxococcota	Polyangia	Polyangiales	Polyangiaceae	norank_f__Polyangiaceae	metagenome_g__norank_f__Polyangiaceae	0.941672	6	20	0	0	0	0	34	0	0	0	0	0	0	0	0	0	31	28	0	0	19	0	0	0	0	0	0	0	0	22	0	0	0	0	0	0	24	14	16	0	0
ASV4798	Bacteria	Myxococcota	Polyangia	Polyangiales	Polyangiaceae	norank_f__Polyangiaceae	NA	0.851267	0	0	0	15	0	0	0	0	0	0	0	0	0	19	0	0	0	0	0	0	0	18	0	0	0	0	21	12	25	0	0	0	0	0	0	0	0	0	0	0	44
ASV5759	Bacteria	Myxococcota	Polyangia	Polyangiales	Polyangiaceae	norank_f__Polyangiaceae	NA	0.979437	0	0	0	0	11	0	0	0	0	0	0	0	14	14	0	0	0	0	0	0	0	0	22	0	0	0	0	0	0	0	0	26	0	0	0	0	0	0	0	0	13
ASV853	Bacteria	Myxococcota	Polyangia	Polyangiales	Polyangiaceae	norank_f__Polyangiaceae	NA	0.828023	8	0	9	0	0	0	12	12	0	0	0	0	0	0	0	31	14	0	0	0	0	0	0	0	0	0	0	0	0	0	15	0	19	6	0	0	0	0	0	8	0
ASV3192	Bacteria	Myxococcota	Polyangia	Polyangiales	Polyangiaceae	norank_f__Polyangiaceae	uncultured_delta_proteobacterium_g__norank_f__Polyangiaceae	0.899735	0	0	27	15	12	0	0	12	0	0	0	16	0	13	0	21	9	13	20	9	13	0	0	0	0	9	0	8	0	16	7	0	0	0	0	0	17	0	0	0	0
ASV13863	Bacteria	Myxococcota	Polyangia	Polyangiales	Polyangiaceae	Pajaroellobacter	NA	0.99942	0	0	0	0	0	0	0	0	0	0	0	0	0	0	0	0	0	0	0	0	0	0	0	0	0	0	0	16	0	0	0	0	0	0	12	14	0	0	0	0	0
ASV1631	Bacteria	Myxococcota	Polyangia	Polyangiales	Polyangiaceae	Pajaroellobacter	NA	0.999768	0	32	9	0	14	0	31	0	26	0	0	14	15	17	0	35	25	0	0	22	21	12	27	0	0	0	6	0	32	23	20	30	14	24	0	0	25	21	30	11	17
ASV3468	Bacteria	Myxococcota	Polyangia	Polyangiales	Polyangiaceae	Pajaroellobacter	NA	0.999678	0	0	16	0	0	16	16	23	0	13	0	12	0	0	0	26	0	23	0	16	0	0	0	0	0	0	0	0	0	26	28	0	0	0	0	0	0	19	0	12	18
ASV3795	Bacteria	Myxococcota	Polyangia	Polyangiales	Polyangiaceae	Pajaroellobacter	NA	0.999254	0	0	10	0	0	0	9	0	0	0	0	0	0	16	0	0	0	0	17	0	0	17	9	0	13	7	0	0	0	0	0	0	0	0	0	0	0	0	0	0	8
ASV12156	Bacteria	Myxococcota	Polyangia	Polyangiales	Polyangiaceae	Pajaroellobacter	metagenome_g__Pajaroellobacter	0.820322	0	0	0	0	0	0	0	0	0	0	0	0	0	0	0	0	0	0	0	0	19	0	0	0	0	0	0	0	0	0	0	0	0	22	0	18	0	11	0	0	0
ASV3553	Bacteria	Myxococcota	Polyangia	Polyangiales	Polyangiaceae	Pajaroellobacter	NA	0.999102	0	0	15	0	0	0	0	0	0	0	0	0	0	0	0	0	0	0	0	0	0	0	0	0	0	0	0	0	0	0	0	0	0	0	0	0	0	0	0	10	0
ASV4935	Bacteria	Myxococcota	Polyangia	Polyangiales	BIrii41	norank_f__BIrii41	NA	0.999964	0	0	0	10	0	0	0	0	0	0	20	7	0	9	7	0	0	0	9	0	0	15	29	0	10	12	9	0	0	0	0	49	0	0	0	0	0	0	0	0	39
ASV9546	Bacteria	Myxococcota	Polyangia	Polyangiales	BIrii41	norank_f__BIrii41	NA	0.999964	0	0	0	0	0	0	0	0	0	0	0	0	0	13	0	0	0	0	0	0	0	0	0	21	0	0	0	0	0	22	0	0	0	0	14	8	0	0	0	0	0
ASV10780	Bacteria	Myxococcota	Polyangia	Polyangiales	BIrii41	norank_f__BIrii41	NA	0.999879	0	0	0	0	0	0	0	0	0	0	0	0	0	0	0	0	21	0	0	0	0	0	0	0	0	0	0	0	0	0	0	0	16	13	0	0	16	0	0	0	0
ASV1991	Bacteria	Myxococcota	Polyangia	Polyangiales	BIrii41	norank_f__BIrii41	uncultured_bacterium_g__norank_f__BIrii41	0.7508	0	13	8	17	21	0	18	14	26	16	0	7	0	13	9	28	0	24	11	18	22	0	24	0	0	11	4	21	0	0	20	0	0	0	0	0	0	28	0	0	18
ASV17682	Bacteria	Myxococcota	Polyangia	Polyangiales	BIrii41	norank_f__BIrii41	NA	0.999948	0	0	0	0	0	0	0	0	0	0	0	0	0	0	0	0	0	0	0	0	0	0	0	0	0	0	0	0	0	0	0	0	0	0	0	0	0	0	0	0	0
ASV5670	Bacteria	Myxococcota	Polyangia	Polyangiales	BIrii41	norank_f__BIrii41	NA	0.999975	0	0	0	0	16	0	22	0	17	0	0	0	17	0	8	21	0	0	7	0	0	0	0	0	11	0	0	0	0	0	8	0	0	0	0	0	11	0	0	0	0
ASV4006	Bacteria	Myxococcota	Polyangia	Polyangiales	BIrii41	norank_f__BIrii41	uncultured_bacterium_g__norank_f__BIrii41	0.898804	0	0	7	0	9	0	0	5	17	0	0	0	16	18	0	15	13	0	10	0	6	0	9	7	0	7	0	11	3	17	0	0	0	0	0	0	0	0	0	0	11
ASV603	Bacteria	Myxococcota	Polyangia	Polyangiales	BIrii41	norank_f__BIrii41	NA	0.999866	12	37	0	0	0	16	14	17	16	0	0	0	16	0	0	0	0	5	0	16	21	0	0	0	0	0	0	0	28	25	12	0	9	0	21	8	0	20	21	0	0
ASV344	Bacteria	Myxococcota	Polyangia	Polyangiales	BIrii41	norank_f__BIrii41	NA	0.999872	19	11	22	17	21	17	30	0	22	13	10	12	27	22	9	41	18	22	19	20	17	0	21	13	0	11	0	19	36	14	25	25	16	30	0	0	21	13	17	19	39
ASV4140	Bacteria	Myxococcota	Polyangia	Polyangiales	BIrii41	norank_f__BIrii41	uncultured_delta_proteobacterium_g__norank_f__BIrii41	0.816208	0	0	6	7	17	0	0	0	0	0	8	13	0	12	19	0	0	0	15	0	0	11	20	0	0	9	0	0	0	0	0	42	0	0	0	0	0	0	0	0	33
ASV7670	Bacteria	Myxococcota	Polyangia	Polyangiales	BIrii41	norank_f__BIrii41	NA	0.999987	0	0	0	0	0	0	0	0	17	0	0	0	0	0	0	0	0	0	0	0	0	0	0	9	0	0	0	18	0	0	15	0	0	0	18	0	0	14	0	0	0
ASV4838	Bacteria	Myxococcota	Polyangia	Polyangiales	BIrii41	norank_f__BIrii41	NA	0.999957	0	0	0	13	0	0	0	0	0	7	15	17	0	17	0	0	0	0	0	15	0	0	0	0	0	11	0	0	0	0	0	14	0	0	0	0	0	0	0	0	13
ASV509	Bacteria	Myxococcota	Polyangia	Polyangiales	BIrii41	norank_f__BIrii41	NA	0.994317	14	0	0	0	0	14	0	0	0	0	0	0	0	0	0	0	0	17	0	0	9	0	0	0	0	0	0	0	17	29	0	0	31	0	0	0	0	0	0	0	0
ASV13178	Bacteria	Myxococcota	Polyangia	Polyangiales	BIrii41	norank_f__BIrii41	NA	0.993194	0	0	0	0	0	0	0	0	0	0	0	0	0	0	0	0	0	0	0	0	0	0	0	5	12	0	0	14	0	0	0	0	0	0	21	19	8	0	0	0	0
ASV1850	Bacteria	Myxococcota	Polyangia	Polyangiales	BIrii41	norank_f__BIrii41	NA	0.991914	0	17	6	0	0	0	0	18	19	0	0	0	0	0	0	0	0	0	0	0	0	0	0	0	0	0	0	0	0	0	22	0	0	0	0	0	0	20	20	0	0
ASV716	Bacteria	Myxococcota	Polyangia	Polyangiales	BIrii41	norank_f__BIrii41	NA	0.998974	10	13	2	0	0	27	20	18	10	0	0	0	7	0	0	28	10	14	0	33	28	0	9	9	0	0	0	19	35	30	5	3	18	7	32	19	8	7	21	0	0
ASV2292	Bacteria	Myxococcota	Polyangia	Polyangiales	BIrii41	norank_f__BIrii41	uncultured_bacterium_g__norank_f__BIrii41	0.892651	0	8	0	0	0	15	0	17	14	0	0	0	0	0	0	13	0	0	0	10	0	0	0	0	0	0	0	16	0	9	13	0	0	8	13	14	0	0	6	10	0
ASV1941	Bacteria	NB1-j	norank_p__NB1-j	norank_c__norank_p__NB1-j	norank_o__norank_c__norank_p__NB1-j	norank_f__norank_o__norank_c__norank_p__NB1-j	NA	0.999786	0	15	0	0	0	0	0	0	0	0	0	0	17	0	0	0	0	0	0	0	0	0	0	0	0	0	0	15	0	0	15	0	12	0	0	20	33	12	0	0	0
ASV1009	Bacteria	NB1-j	norank_p__NB1-j	norank_c__norank_p__NB1-j	norank_o__norank_c__norank_p__NB1-j	norank_f__norank_o__norank_c__norank_p__NB1-j	NA	0.999726	7	13	0	0	0	8	41	15	0	0	0	0	0	0	0	29	0	0	0	16	0	0	0	0	0	0	0	0	37	23	9	0	0	0	0	0	0	0	20	0	0
ASV2527	Bacteria	NB1-j	norank_p__NB1-j	norank_c__norank_p__NB1-j	norank_o__norank_c__norank_p__NB1-j	norank_f__norank_o__norank_c__norank_p__NB1-j	NA	0.999968	0	6	0	0	0	0	0	0	14	0	0	0	12	0	0	19	0	17	0	0	0	0	0	0	0	0	0	0	25	14	0	0	0	0	0	0	19	12	12	0	0
ASV609	Bacteria	NB1-j	norank_p__NB1-j	norank_c__norank_p__NB1-j	norank_o__norank_c__norank_p__NB1-j	norank_f__norank_o__norank_c__norank_p__NB1-j	NA	0.99988	12	16	0	0	0	6	12	6	8	0	0	0	13	0	0	14	10	14	0	16	11	0	0	10	0	0	0	0	21	12	15	0	8	12	3	9	17	11	11	10	0
ASV2148	Bacteria	NB1-j	norank_p__NB1-j	norank_c__norank_p__NB1-j	norank_o__norank_c__norank_p__NB1-j	norank_f__norank_o__norank_c__norank_p__NB1-j	uncultured_Myxococcales_bacterium_g__norank	0.999957	0	10	0	0	0	0	0	8	15	0	0	0	0	0	0	9	6	13	0	0	12	0	0	0	0	0	0	0	0	0	11	0	10	0	0	7	8	0	0	0	0
ASV1902	Bacteria	NB1-j	norank_p__NB1-j	norank_c__norank_p__NB1-j	norank_o__norank_c__norank_p__NB1-j	norank_f__norank_o__norank_c__norank_p__NB1-j	uncultured_Desulfoglaeba_sp.	0.930445	0	16	0	0	0	0	30	0	0	0	0	0	0	0	0	0	0	0	0	0	18	0	0	0	0	0	0	0	20	0	0	0	0	7	0	0	19	0	0	0	0
ASV1035	Bacteria	Myxococcota	Myxococcia	Myxococcales	Vulgatibacteraceae	Vulgatibacter	NA	0.999863	6	0	8	0	5	0	25	0	20	0	0	4	23	14	7	10	12	7	13	10	23	15	8	7	0	0	14	15	0	24	12	0	12	0	9	0	15	0	22	9	0
ASV8400	Bacteria	Myxococcota	Myxococcia	Myxococcales	Myxococcaceae	NA	NA	0.999068	0	0	0	0	0	0	0	0	0	0	28	0	0	0	0	22	0	0	0	0	0	0	0	0	40	0	0	0	0	44	0	36	0	25	0	0	0	0	0	0	35
ASV3051	Bacteria	Myxococcota	Myxococcia	Myxococcales	Myxococcaceae	NA	NA	0.99964	0	0	44	22	0	0	0	0	38	0	0	0	0	0	0	30	31	0	31	0	0	16	0	0	0	0	0	57	0	0	0	0	0	0	0	0	0	0	34	0	0
ASV9111	Bacteria	Myxococcota	Myxococcia	Myxococcales	Myxococcaceae	NA	NA	0.999568	0	0	0	0	0	0	0	0	0	0	0	0	27	35	30	0	0	0	0	23	0	0	39	0	15	29	14	0	31	0	0	0	0	0	0	0	30	0	0	37	38
ASV752	Bacteria	Myxococcota	Myxococcia	Myxococcales	Myxococcaceae	norank_f__Myxococcaceae	NA	0.704942	10	0	13	37	26	12	0	0	14	23	15	32	0	54	15	0	0	9	16	0	0	19	14	18	15	20	23	0	13	10	0	12	16	0	0	0	0	10	13	0	35
ASV3257	Bacteria	Myxococcota	Myxococcia	Myxococcales	Myxococcaceae	NA	NA	0.999726	0	0	23	0	25	0	0	0	0	22	21	21	0	43	18	0	0	0	37	0	0	23	38	0	0	15	26	0	0	0	0	0	0	0	10	0	0	0	0	0	32
ASV2333	Bacteria	Myxococcota	Myxococcia	Myxococcales	Myxococcaceae	norank_f__Myxococcaceae	uncultured_bacterium_g__norank_f__Myxococcaceae	0.739959	0	7	0	0	0	0	13	0	0	0	0	0	8	0	0	10	0	0	0	13	10	0	0	0	0	0	0	22	12	0	21	0	0	0	15	19	8	0	9	0	0
ASV3255	Bacteria	Myxococcota	Myxococcia	Myxococcales	Myxococcaceae	NA	NA	0.991379	0	0	23	31	29	0	0	0	0	21	11	19	0	32	13	0	0	0	37	0	0	10	23	0	14	14	15	0	0	0	0	12	0	0	0	9	0	0	0	0	32
ASV1664	Bacteria	Myxococcota	Myxococcia	Myxococcales	Myxococcaceae	NA	NA	0.999567	0	28	0	0	0	0	0	0	0	0	0	0	0	0	0	19	25	0	0	0	0	0	0	0	0	0	0	0	0	0	0	0	0	0	0	0	23	0	0	0	0
ASV3075	Bacteria	Myxococcota	Myxococcia	Myxococcales	Myxococcaceae	Archangium	NA	0.701115	0	0	38	38	0	0	0	0	19	0	0	29	0	38	0	0	0	0	47	0	0	39	33	0	0	40	32	0	0	0	0	0	0	0	0	0	0	0	0	0	0
ASV4964	Bacteria	Myxococcota	Myxococcia	Myxococcales	Myxococcaceae	norank_f__Myxococcaceae	uncultured_bacterium_g__norank_f__Myxococcaceae	0.96721	0	0	0	10	16	0	0	24	0	0	0	11	0	20	11	11	0	0	0	0	0	0	17	14	8	0	0	0	0	0	0	0	0	0	0	0	15	0	0	0	24
ASV1695	Bacteria	Myxococcota	Myxococcia	Myxococcales	Myxococcaceae	norank_f__Myxococcaceae	uncultured_bacterium_g__norank_f__Myxococcaceae	0.828369	0	25	0	23	21	0	0	0	0	25	0	15	0	0	0	24	0	0	0	20	14	25	29	0	27	0	30	0	0	0	0	25	0	0	0	0	0	0	0	0	31
ASV3162	Bacteria	Myxococcota	Myxococcia	Myxococcales	Myxococcaceae	norank_f__Myxococcaceae	uncultured_bacterium_g__norank_f__Myxococcaceae	0.962378	0	0	30	0	0	0	0	0	0	0	0	0	0	0	0	0	0	14	0	0	0	0	0	0	0	0	0	0	23	0	0	0	0	0	0	0	13	21	0	0	0
ASV3616	Bacteria	Myxococcota	Myxococcia	Myxococcales	Myxococcaceae	norank_f__Myxococcaceae	uncultured_bacterium_g__norank_f__Myxococcaceae	0.8416	0	0	13	0	14	0	0	0	0	0	0	12	0	0	0	0	0	0	0	0	0	0	0	0	0	12	0	0	0	0	0	0	0	0	0	0	0	0	0	0	19
ASV764	Bacteria	Myxococcota	Myxococcia	Myxococcales	Myxococcaceae	Myxococcus	NA	0.91681	10	0	26	0	0	0	0	0	8	0	0	20	0	16	8	0	0	0	13	0	0	15	16	0	24	33	53	0	0	0	0	11	0	0	0	0	0	0	0	0	15
ASV3602	Bacteria	Cyanobacteria	Cyanobacteriia	Oxyphotobacteria_Incertae_Sedis	unclassified_o__Oxyphotobacteria_Incertae_Sedis	CENA518	uncultured_bacterium_g__CENA518	0.997555	0	0	13	15	7	0	0	0	0	32	12	14	0	12	0	0	0	0	19	0	0	51	8	0	10	21	12	0	0	0	0	47	0	0	0	0	0	0	0	0	51
ASV705	Bacteria	Cyanobacteria	Cyanobacteriia	Oxyphotobacteria_Incertae_Sedis	unclassified_o__Oxyphotobacteria_Incertae_Sedis	NA	NA	0.999337	10	27	0	0	0	0	9	0	16	0	0	0	0	0	0	19	11	12	0	0	12	0	0	0	0	0	0	0	8	16	3	0	15	8	3	0	16	13	5	0	0
ASV1040	Bacteria	Cyanobacteria	Cyanobacteriia	Oxyphotobacteria_Incertae_Sedis	unclassified_o__Oxyphotobacteria_Incertae_Sedis	Leptolyngbya_ANT.L52.2	NA	0.999936	6	26	0	0	0	5	17	8	22	0	0	0	4	0	0	7	9	17	0	29	11	0	0	0	0	0	0	0	9	6	4	0	11	7	0	0	13	12	5	4	0
ASV2097	Bacteria	Cyanobacteria	Cyanobacteriia	Oxyphotobacteria_Incertae_Sedis	unclassified_o__Oxyphotobacteria_Incertae_Sedis	EcFYyy-200	Leptolyngbya_sp._UIC_10061	0.776886	0	11	0	0	0	5	12	0	5	0	0	0	0	3	0	4	9	6	0	18	13	0	0	6	0	0	0	0	12	5	7	0	0	0	0	5	6	11	0	2	0
ASV4782	Bacteria	Cyanobacteria	Cyanobacteriia	Oxyphotobacteria_Incertae_Sedis	unclassified_o__Oxyphotobacteria_Incertae_Sedis	Leptolyngbya_EcFYyyy-00	uncultured_bacterium_g__Leptolyngbya_EcFYyyy-00	0.990963	0	0	0	15	3	0	0	0	0	12	3	13	0	0	6	0	0	0	8	0	0	22	0	0	4	5	6	0	0	0	0	10	0	0	0	0	0	0	0	0	18
ASV3512	Bacteria	Cyanobacteria	Cyanobacteriia	Oxyphotobacteria_Incertae_Sedis	unclassified_o__Oxyphotobacteria_Incertae_Sedis	Leptolyngbya_EcFYyyy-00	uncultured_bacterium_g__Leptolyngbya_EcFYyyy-00	0.973239	0	0	15	21	9	0	0	0	0	0	0	28	0	8	4	0	0	0	0	0	0	20	9	0	8	23	4	0	0	0	0	13	0	0	0	0	0	0	0	0	23
ASV3302	Bacteria	Cyanobacteria	Cyanobacteriia	Cyanobacteriales	Phormidiaceae	Tychonema_CCAP_1459-11B	NA	0.9981	0	0	21	43	11	0	0	0	0	14	53	15	0	7	29	0	0	0	147	0	0	26	50	0	158	31	11	0	0	0	0	125	0	0	0	0	2	0	0	0	56
ASV1283	Bacteria	Cyanobacteria	Cyanobacteriia	Cyanobacteriales	norank_o__Cyanobacteriales	norank_f__norank_o__Cyanobacteriales	NA	0.977361	4	14	4	4	0	3	16	5	4	0	0	0	0	0	0	15	11	10	2	11	10	20	3	7	0	0	0	0	4	3	2	12	12	0	0	0	8	15	0	0	0
ASV1634	Bacteria	Cyanobacteria	Cyanobacteriia	Cyanobacteriales	Coleofasciculaceae	norank_f__Coleofasciculaceae	uncultured_bacterium_g__norank_f__Coleofasciculaceae	0.825577	0	31	0	0	0	0	0	0	0	0	0	0	0	0	0	0	9	0	0	24	10	0	0	4	0	0	0	0	11	3	0	0	14	0	0	0	0	5	0	0	0
ASV4183	Bacteria	Cyanobacteria	Sericytochromatia	norank_c__Sericytochromatia	norank_o__norank_c__Sericytochromatia	norank_f__norank_o__norank_c__Sericytochromatia	NA	0.999965	0	0	6	0	16	0	0	0	18	0	0	14	0	0	0	8	0	0	7	9	16	11	0	34	3	11	10	0	0	12	19	0	0	0	0	0	9	14	0	0	11
ASV3082	Bacteria	Proteobacteria	Gammaproteobacteria	Burkholderiales	A21b	norank_f__A21b	NA	0.999789	0	0	37	16	23	0	0	0	0	5	0	15	0	21	8	0	0	0	21	0	0	8	15	0	29	30	11	0	0	0	0	14	0	0	0	0	0	0	0	0	26
ASV268	Bacteria	Proteobacteria	Gammaproteobacteria	Burkholderiales	SC-I-84	norank_f__SC-I-84	NA	0.999946	22	35	63	54	64	31	42	41	40	44	26	75	27	135	37	65	46	39	77	37	41	44	53	42	48	36	50	62	55	51	48	69	25	15	65	21	51	30	39	23	106
ASV960	Bacteria	Proteobacteria	Gammaproteobacteria	Burkholderiales	SC-I-84	norank_f__SC-I-84	NA	0.999741	7	13	0	0	0	0	8	0	0	0	0	0	8	0	0	24	0	0	0	17	11	0	0	7	0	0	0	0	23	0	14	0	10	0	11	0	9	12	8	18	0
ASV3133	Bacteria	Proteobacteria	Gammaproteobacteria	Burkholderiales	Nitrosomonadaceae	Ellin6067	NA	0.999999	0	0	32	36	52	0	0	0	0	19	20	41	0	63	25	0	0	0	27	0	0	17	44	0	35	26	36	0	0	0	0	69	0	0	0	0	0	0	0	0	70
ASV3047	Bacteria	Proteobacteria	Gammaproteobacteria	Burkholderiales	Nitrosomonadaceae	Ellin6067	NA	0.999997	0	0	44	40	40	0	0	0	0	15	0	17	0	34	11	0	0	0	27	0	0	18	34	0	30	33	19	0	0	0	0	25	0	0	0	0	0	0	0	0	39
ASV1594	Bacteria	Proteobacteria	Gammaproteobacteria	Burkholderiales	Nitrosomonadaceae	Ellin6067	NA	0.999996	0	43	0	0	0	0	30	0	0	0	0	0	19	0	0	0	0	0	0	17	32	0	0	0	0	0	0	0	0	0	0	0	25	0	0	0	45	0	23	0	0
ASV7393	Bacteria	Proteobacteria	Gammaproteobacteria	Burkholderiales	Nitrosomonadaceae	Ellin6067	NA	0.999994	0	0	0	0	0	0	0	16	0	0	0	0	0	0	0	40	28	0	0	0	0	0	0	0	0	0	0	0	0	23	0	0	0	29	0	0	0	18	0	0	0
ASV3689	Bacteria	Proteobacteria	Gammaproteobacteria	Burkholderiales	Nitrosomonadaceae	Ellin6067	NA	1	0	0	12	18	0	0	0	0	0	0	0	21	0	23	0	0	0	0	0	0	0	14	0	0	0	0	15	0	0	0	0	20	0	0	0	0	0	0	0	0	23
ASV4780	Bacteria	Proteobacteria	Gammaproteobacteria	Burkholderiales	Nitrosomonadaceae	Ellin6067	NA	1	0	0	0	16	0	0	0	0	0	16	0	0	0	39	21	0	0	0	0	0	0	0	38	0	0	0	15	0	0	0	0	23	0	0	0	0	0	0	0	0	23
ASV5695	Bacteria	Proteobacteria	Gammaproteobacteria	Burkholderiales	Nitrosomonadaceae	Ellin6067	NA	0.999998	0	0	0	0	14	35	31	0	0	0	0	18	0	17	0	0	18	0	18	0	0	12	29	0	15	0	7	0	0	0	0	22	0	0	0	0	0	0	0	0	30
ASV8126	Bacteria	Proteobacteria	Gammaproteobacteria	Burkholderiales	Nitrosomonadaceae	Ellin6067	NA	0.999998	0	0	0	0	0	0	0	0	0	14	0	0	0	16	0	0	0	0	0	0	0	23	0	0	0	0	23	0	0	0	0	24	0	0	0	0	0	0	0	0	25
ASV2038	Bacteria	Proteobacteria	Gammaproteobacteria	Burkholderiales	Nitrosomonadaceae	Ellin6067	NA	0.999997	0	12	0	0	0	0	9	21	16	0	0	0	23	0	0	14	0	21	0	20	15	0	0	20	0	0	0	11	15	16	25	0	15	0	0	9	14	10	16	0	0
ASV11925	Bacteria	Proteobacteria	Gammaproteobacteria	Burkholderiales	Nitrosomonadaceae	Ellin6067	NA	0.999996	0	0	0	0	0	0	0	0	0	0	0	0	0	0	0	0	0	0	0	20	14	0	0	0	0	0	0	0	18	0	33	0	0	0	0	0	15	0	0	0	0
ASV4857	Bacteria	Proteobacteria	Gammaproteobacteria	Burkholderiales	Nitrosomonadaceae	Ellin6067	NA	0.999999	0	0	0	13	0	0	0	0	0	0	22	0	0	20	10	0	0	0	13	0	0	15	12	0	0	14	11	0	0	0	0	14	0	0	0	0	0	0	0	0	33
ASV8579	Bacteria	Proteobacteria	Gammaproteobacteria	Burkholderiales	Nitrosomonadaceae	Ellin6067	NA	0.999997	0	0	0	0	0	0	0	0	0	0	0	29	0	19	0	0	0	0	13	0	0	0	14	0	41	20	0	0	0	0	0	0	0	0	0	0	0	0	0	0	26
ASV7676	Bacteria	Proteobacteria	Gammaproteobacteria	Burkholderiales	Nitrosomonadaceae	Ellin6067	NA	0.999998	0	0	0	0	0	0	0	0	17	0	0	0	0	0	0	28	0	0	0	0	25	0	0	0	0	0	0	20	0	20	0	0	0	0	21	0	0	0	0	0	0
ASV53	Bacteria	Proteobacteria	Gammaproteobacteria	Burkholderiales	Nitrosomonadaceae	Ellin6067	NA	0.999991	44	69	31	18	15	23	99	43	48	13	0	0	55	49	16	82	52	44	19	47	53	11	37	53	20	14	28	34	48	51	66	25	43	0	19	49	74	47	34	36	32
ASV10192	Bacteria	Proteobacteria	Gammaproteobacteria	Burkholderiales	Nitrosomonadaceae	Ellin6067	NA	0.999999	0	0	0	0	0	0	0	0	0	0	0	0	0	0	0	18	0	0	0	0	0	0	0	0	0	0	0	0	17	0	27	0	0	0	0	15	14	0	24	0	0
ASV1760	Bacteria	Proteobacteria	Gammaproteobacteria	Burkholderiales	Nitrosomonadaceae	Ellin6067	NA	0.999999	0	21	0	0	0	0	15	0	17	10	0	0	0	0	0	0	15	38	0	0	0	0	0	0	0	0	0	0	0	15	0	0	0	14	0	0	0	23	0	0	0
ASV2299	Bacteria	Proteobacteria	Gammaproteobacteria	Burkholderiales	Nitrosomonadaceae	Nitrosospira	NA	0.99827	0	8	0	0	0	0	0	10	0	0	0	0	0	42	10	9	11	0	0	0	0	21	16	12	0	0	0	0	0	15	0	0	0	0	6	0	6	0	0	0	0
ASV3261	Bacteria	Proteobacteria	Gammaproteobacteria	Burkholderiales	Nitrosomonadaceae	Nitrosospira	NA	0.998998	0	0	23	31	28	0	0	0	0	19	0	22	0	0	0	0	0	0	35	0	0	0	0	0	27	0	0	0	0	0	0	27	0	0	0	0	0	0	0	0	28
ASV21415	Bacteria	Proteobacteria	Gammaproteobacteria	Burkholderiales	Nitrosomonadaceae	Nitrosospira	NA	0.998943	0	0	0	0	0	0	0	0	0	0	0	0	0	0	0	0	0	0	0	0	0	0	0	0	0	0	0	0	0	0	0	0	0	0	0	0	0	0	0	0	0
ASV260	Bacteria	Proteobacteria	Gammaproteobacteria	Burkholderiales	Hydrogenophilaceae	Thiobacillus	NA	0.999981	22	29	0	46	8	0	75	15	5	0	0	23	0	19	0	0	7	22	3	8	24	28	0	0	7	8	0	0	11	31	0	55	0	13	0	0	50	60	8	4	43
ASV1138	Bacteria	Proteobacteria	Gammaproteobacteria	Burkholderiales	TRA3-20	norank_f__TRA3-20	NA	0.999805	5	11	18	13	16	0	6	6	0	6	0	11	7	24	0	14	14	5	8	8	11	0	11	8	10	10	0	0	12	11	6	24	13	0	5	9	0	0	13	5	22
ASV498	Bacteria	Proteobacteria	Gammaproteobacteria	Burkholderiales	TRA3-20	norank_f__TRA3-20	uncultured_gamma_proteobacterium_g__norank_f__TRA3-20	0.778647	15	0	0	0	0	0	22	0	0	0	0	0	39	0	0	0	0	0	0	0	0	0	0	0	0	0	0	0	0	0	0	0	0	0	0	0	0	0	0	0	0
ASV6638	Bacteria	Proteobacteria	Gammaproteobacteria	Burkholderiales	TRA3-20	norank_f__TRA3-20	uncultured_gamma_proteobacterium_g__norank_f__TRA3-20	0.755812	0	0	0	0	0	0	32	33	0	0	0	0	0	0	0	23	0	43	0	0	0	0	0	0	0	0	0	0	0	0	39	0	33	35	0	0	31	0	0	0	0
ASV1754	Bacteria	Proteobacteria	Gammaproteobacteria	Burkholderiales	TRA3-20	norank_f__TRA3-20	NA	0.995517	0	21	15	0	0	0	26	0	38	0	0	0	0	0	0	25	29	0	0	36	32	0	0	39	0	0	0	36	0	42	0	0	0	0	0	23	0	23	38	25	0
ASV5756	Bacteria	Proteobacteria	Gammaproteobacteria	Burkholderiales	TRA3-20	norank_f__TRA3-20	NA	0.993425	0	0	0	0	11	0	0	0	0	0	0	14	0	19	18	0	0	0	22	0	0	20	0	0	0	8	20	0	0	0	0	10	0	0	0	0	0	0	0	0	26
ASV4736	Bacteria	Proteobacteria	Gammaproteobacteria	Burkholderiales	TRA3-20	norank_f__TRA3-20	NA	0.992179	0	0	0	18	13	37	0	0	0	13	0	12	0	31	0	0	0	0	0	0	0	0	0	0	0	0	0	0	39	0	14	14	0	0	21	0	0	0	0	0	0
ASV3686	Bacteria	Proteobacteria	Gammaproteobacteria	Burkholderiales	TRA3-20	norank_f__TRA3-20	uncultured_gamma_proteobacterium_g__norank_f__TRA3-20	0.97515	0	0	12	0	0	0	0	0	0	0	0	4	0	15	0	20	0	0	13	0	19	0	25	0	14	7	0	0	0	0	0	0	0	0	0	0	0	0	0	0	19
ASV3500	Bacteria	Proteobacteria	Gammaproteobacteria	Burkholderiales	TRA3-20	norank_f__TRA3-20	NA	0.997381	0	0	16	14	0	0	0	0	0	0	0	15	0	19	0	0	0	0	12	0	0	0	4	0	14	11	0	0	0	0	0	17	0	0	0	0	0	0	0	0	30
ASV4807	Bacteria	Proteobacteria	Gammaproteobacteria	Burkholderiales	TRA3-20	norank_f__TRA3-20	NA	0.999401	0	0	0	14	24	0	0	0	0	0	21	0	0	23	0	0	0	0	19	0	0	21	10	0	19	0	0	0	0	0	0	0	0	0	0	0	0	0	0	0	26
ASV3502	Bacteria	Proteobacteria	Gammaproteobacteria	Burkholderiales	TRA3-20	norank_f__TRA3-20	NA	0.999528	0	0	16	0	0	0	0	0	0	0	0	0	0	0	0	0	0	0	0	0	0	0	0	0	0	0	0	0	0	0	0	34	0	0	0	0	0	0	0	0	0
ASV3111	Bacteria	Proteobacteria	Gammaproteobacteria	Burkholderiales	TRA3-20	norank_f__TRA3-20	NA	0.999849	0	0	33	17	32	0	0	0	0	15	0	17	0	39	32	0	0	0	24	0	10	15	24	0	23	25	44	19	0	0	0	0	0	0	19	0	0	0	0	0	30
ASV549	Bacteria	Proteobacteria	Gammaproteobacteria	Burkholderiales	TRA3-20	norank_f__TRA3-20	NA	0.999426	14	13	0	0	0	33	0	0	0	0	0	0	0	0	0	27	12	0	0	10	0	0	0	0	0	0	0	0	0	0	16	0	0	0	0	0	0	15	0	0	0
ASV688	Bacteria	Proteobacteria	Gammaproteobacteria	Burkholderiales	TRA3-20	norank_f__TRA3-20	uncultured_Nitrosomonadales_bacterium_g__norank	0.784422	11	8	0	0	0	14	11	0	15	0	0	0	0	17	0	34	17	20	0	19	14	0	0	0	0	0	0	12	19	11	16	0	0	11	0	10	0	10	25	15	0
ASV1284	Bacteria	Proteobacteria	Gammaproteobacteria	Burkholderiales	TRA3-20	norank_f__TRA3-20	NA	0.999658	4	12	0	0	0	0	28	8	5	0	0	0	0	0	0	23	11	0	0	4	13	0	0	0	0	0	0	0	0	25	0	0	4	17	0	0	13	9	7	0	0
ASV3104	Bacteria	Proteobacteria	Gammaproteobacteria	Burkholderiales	TRA3-20	norank_f__TRA3-20	NA	0.999942	0	0	34	19	11	0	0	0	0	0	0	13	19	23	15	14	0	0	38	0	0	15	24	17	22	19	16	0	0	0	7	23	0	0	0	8	10	0	0	0	13
ASV6632	Bacteria	Proteobacteria	Gammaproteobacteria	Burkholderiales	TRA3-20	norank_f__TRA3-20	NA	0.999997	0	0	0	0	0	0	35	0	0	0	0	0	0	0	0	0	0	0	0	0	0	0	0	0	0	0	0	0	0	0	0	0	22	32	0	0	0	0	0	0	0
ASV1774	Bacteria	Proteobacteria	Gammaproteobacteria	Burkholderiales	TRA3-20	norank_f__TRA3-20	NA	0.999992	0	20	16	10	9	0	0	0	0	18	0	21	19	32	13	30	10	26	11	23	0	0	0	0	10	7	0	16	45	0	0	0	0	0	0	0	0	20	25	0	17
ASV476	Bacteria	Proteobacteria	Gammaproteobacteria	Burkholderiales	TRA3-20	norank_f__TRA3-20	NA	0.999987	15	12	0	0	0	0	27	0	39	0	0	0	16	0	0	18	15	0	0	16	22	0	0	0	0	0	0	0	20	12	25	0	0	26	0	0	0	18	0	22	0
ASV3028	Bacteria	Proteobacteria	Gammaproteobacteria	Burkholderiales	TRA3-20	norank_f__TRA3-20	NA	0.999708	0	0	51	21	41	0	0	0	0	16	0	30	0	0	0	0	0	0	0	0	0	31	37	0	32	25	0	0	0	0	0	39	0	0	0	0	0	0	0	0	49
ASV9451	Bacteria	Proteobacteria	Gammaproteobacteria	Burkholderiales	TRA3-20	norank_f__TRA3-20	NA	0.999436	0	0	0	0	0	0	0	0	0	0	0	0	0	35	34	13	0	0	49	0	0	0	0	0	0	0	0	19	0	0	0	0	0	0	0	0	0	0	0	0	0
ASV1776	Bacteria	Proteobacteria	Gammaproteobacteria	Burkholderiales	TRA3-20	norank_f__TRA3-20	uncultured_Nitrosomonadaceae_bacterium_g__norank_f__TRA3-20	0.713706	0	20	0	0	0	25	33	0	36	0	0	0	30	0	0	0	0	0	0	28	42	0	0	0	0	0	0	0	41	37	0	0	0	0	0	18	41	16	25	0	0
ASV427	Bacteria	Proteobacteria	Gammaproteobacteria	Burkholderiales	TRA3-20	norank_f__TRA3-20	NA	0.999843	17	0	0	0	0	0	0	33	0	0	0	0	0	0	0	30	27	27	0	0	0	0	0	27	0	0	0	0	0	0	45	0	0	0	0	0	0	0	0	19	0
ASV1952	Bacteria	Proteobacteria	Gammaproteobacteria	Burkholderiales	TRA3-20	norank_f__TRA3-20	NA	0.999892	0	14	0	0	0	0	14	0	0	0	0	0	0	0	0	21	13	0	0	0	11	0	0	0	0	0	0	0	0	13	0	0	0	0	0	0	0	0	0	0	0
ASV2102	Bacteria	Proteobacteria	Gammaproteobacteria	Burkholderiales	Rhodocyclaceae	Azoarcus	NA	0.88525	0	11	0	0	0	14	0	12	0	0	0	0	11	0	0	0	0	20	0	0	10	0	0	0	0	0	0	0	15	6	0	0	0	0	0	0	0	21	10	0	0
ASV1684	Bacteria	Proteobacteria	Gammaproteobacteria	Burkholderiales	Rhodocyclaceae	Thauera	NA	0.980302	0	25	0	0	0	0	24	0	16	0	0	0	7	0	0	12	0	23	0	0	12	0	0	0	0	0	0	0	11	8	12	0	0	8	0	3	10	11	13	9	0
ASV1051	Bacteria	Proteobacteria	Gammaproteobacteria	Burkholderiales	Rhodocyclaceae	Thauera	NA	0.879667	6	15	0	0	0	9	0	13	8	0	0	0	0	0	0	19	6	15	0	11	5	0	0	0	0	0	0	0	8	0	0	0	0	0	0	0	4	14	9	0	0
ASV2120	Bacteria	Proteobacteria	Gammaproteobacteria	Burkholderiales	Nitrosomonadaceae	MND1	NA	0.999708	0	11	28	17	5	0	0	0	0	7	11	5	0	14	10	0	0	0	13	0	0	0	26	13	17	9	0	0	0	0	0	8	0	0	0	0	0	0	0	0	14
ASV1748	Bacteria	Proteobacteria	Gammaproteobacteria	Burkholderiales	Nitrosomonadaceae	MND1	NA	0.999171	0	21	0	0	0	6	35	9	7	0	0	0	5	0	0	17	12	12	0	15	17	0	0	0	0	0	0	0	20	15	0	0	9	0	0	5	19	18	13	8	0
ASV2371	Bacteria	Proteobacteria	Gammaproteobacteria	Burkholderiales	Nitrosomonadaceae	MND1	NA	0.999914	0	7	0	0	0	8	15	0	0	0	0	0	0	0	0	0	15	6	0	11	7	0	0	0	0	0	0	0	13	0	0	0	0	0	0	0	20	9	7	0	0
ASV10142	Bacteria	Proteobacteria	Gammaproteobacteria	Burkholderiales	Nitrosomonadaceae	MND1	NA	0.999947	0	0	0	0	0	0	0	0	0	0	0	0	0	0	0	27	0	0	0	0	0	0	0	0	0	0	0	21	0	25	0	0	0	0	0	0	0	0	0	24	0
ASV1600	Bacteria	Proteobacteria	Gammaproteobacteria	Burkholderiales	Nitrosomonadaceae	MND1	NA	0.999869	0	41	0	0	0	20	45	0	20	0	0	0	22	0	0	0	28	0	0	23	25	0	0	0	0	0	0	0	16	18	0	0	15	0	0	0	21	21	20	0	0
ASV1932	Bacteria	Proteobacteria	Gammaproteobacteria	Burkholderiales	Nitrosomonadaceae	MND1	NA	0.999998	0	15	0	0	19	0	0	0	0	0	0	16	0	0	0	0	0	0	0	0	0	0	0	0	0	0	0	0	0	0	20	15	0	0	0	0	0	0	0	0	24
ASV166	Bacteria	Proteobacteria	Gammaproteobacteria	Burkholderiales	Nitrosomonadaceae	MND1	uncultured_Burkholderiaceae_bacterium_g__MND1	0.701987	27	24	0	0	0	31	60	24	19	0	0	0	16	15	0	30	39	31	0	13	36	0	0	19	0	0	0	18	51	40	27	0	20	0	0	19	31	15	38	26	0
ASV915	Bacteria	Proteobacteria	Gammaproteobacteria	Burkholderiales	Nitrosomonadaceae	MND1	NA	0.999976	8	19	0	3	0	15	26	14	12	4	0	0	13	7	0	16	17	7	0	13	10	0	0	12	0	0	5	11	10	14	11	0	7	13	22	10	10	15	7	11	0
ASV3740	Bacteria	Proteobacteria	Gammaproteobacteria	Burkholderiales	Nitrosomonadaceae	MND1	NA	0.999988	0	0	11	10	11	0	0	0	0	18	7	9	0	22	12	0	0	0	22	0	0	18	0	0	12	15	24	0	0	0	0	0	0	0	0	0	0	0	0	0	19
ASV801	Bacteria	Proteobacteria	Gammaproteobacteria	Burkholderiales	Nitrosomonadaceae	MND1	NA	0.999994	9	21	0	0	0	0	19	15	0	0	0	0	12	0	0	25	9	18	0	0	17	0	0	16	0	0	0	0	14	12	12	0	0	0	13	9	10	11	20	7	0
ASV3212	Bacteria	Proteobacteria	Gammaproteobacteria	Burkholderiales	Nitrosomonadaceae	MND1	NA	0.999996	0	0	26	14	0	0	0	0	0	9	0	19	0	0	17	0	0	0	29	0	0	17	28	0	11	0	23	0	0	0	0	13	0	0	0	0	0	0	0	0	20
ASV3015	Bacteria	Proteobacteria	Gammaproteobacteria	Burkholderiales	Nitrosomonadaceae	MND1	NA	0.999995	0	0	58	40	45	0	0	0	0	0	0	0	27	62	0	0	0	0	40	0	0	49	51	0	0	30	45	0	0	0	0	53	0	0	0	0	0	0	0	0	93
ASV266	Bacteria	Proteobacteria	Gammaproteobacteria	Burkholderiales	Nitrosomonadaceae	MND1	NA	0.999996	22	21	96	65	87	24	39	19	46	86	42	89	30	124	115	54	47	33	78	27	35	90	119	36	93	59	100	47	45	44	47	87	28	19	23	33	30	45	37	38	100
ASV654	Bacteria	Proteobacteria	Gammaproteobacteria	Burkholderiales	Nitrosomonadaceae	MND1	NA	0.999994	12	0	0	0	0	0	20	18	0	0	0	0	0	0	0	23	16	0	0	0	0	0	0	0	0	0	0	0	0	0	20	0	0	0	0	0	14	0	13	15	0
ASV2301	Bacteria	Proteobacteria	Gammaproteobacteria	Burkholderiales	Nitrosomonadaceae	MND1	NA	0.999997	0	8	68	23	35	18	12	15	24	0	11	11	38	66	19	26	8	13	54	26	7	14	62	34	22	21	12	46	31	0	27	16	15	9	22	20	11	0	16	17	42
ASV5814	Bacteria	Proteobacteria	Gammaproteobacteria	Burkholderiales	Nitrosomonadaceae	MND1	NA	0.999997	0	0	0	0	10	0	0	0	0	13	0	0	0	10	15	0	0	0	0	0	0	9	10	0	0	0	16	0	0	0	0	15	0	0	0	0	0	0	0	0	17
ASV3148	Bacteria	Proteobacteria	Gammaproteobacteria	Burkholderiales	Nitrosomonadaceae	MND1	NA	0.999997	0	0	31	0	11	0	0	0	0	0	0	10	0	15	0	0	0	0	0	0	0	13	0	0	13	12	0	0	0	0	0	0	0	0	0	0	0	0	0	0	28
ASV3158	Bacteria	Proteobacteria	Gammaproteobacteria	Burkholderiales	Nitrosomonadaceae	MND1	NA	0.999991	0	0	30	42	41	0	0	0	0	40	0	51	0	61	0	0	0	0	39	0	0	40	27	0	19	35	23	0	0	0	0	22	0	0	0	0	0	24	0	0	46
ASV3076	Bacteria	Proteobacteria	Gammaproteobacteria	Burkholderiales	Nitrosomonadaceae	MND1	NA	0.999995	0	0	38	14	34	0	0	0	0	23	0	21	0	40	19	0	0	0	28	0	0	28	34	0	20	18	18	0	0	0	0	24	0	0	0	0	0	0	0	0	45
ASV1657	Bacteria	Proteobacteria	Gammaproteobacteria	Burkholderiales	Nitrosomonadaceae	MND1	NA	0.999975	0	28	0	0	0	11	30	12	23	0	0	0	15	0	0	16	9	15	0	14	27	0	0	16	0	0	0	0	16	14	16	0	0	11	0	7	29	8	0	0	0
ASV146	Bacteria	Proteobacteria	Gammaproteobacteria	Burkholderiales	Nitrosomonadaceae	MND1	NA	0.999995	29	23	16	25	16	23	38	0	19	24	0	36	29	26	25	29	22	22	15	22	18	0	26	15	19	22	27	15	0	26	29	17	17	49	0	15	0	23	0	19	16
ASV1447	Bacteria	Proteobacteria	Gammaproteobacteria	Burkholderiales	Nitrosomonadaceae	mle1-7	NA	0.995986	3	14	0	0	0	15	18	4	29	0	0	0	11	0	0	16	7	11	0	12	14	0	0	8	0	0	0	8	24	13	9	0	10	0	0	4	14	17	11	6	0
ASV3427	Bacteria	Proteobacteria	Gammaproteobacteria	Burkholderiales	Nitrosomonadaceae	mle1-7	uncultured_beta_proteobacterium_g__mle1-7	0.701678	0	0	17	7	12	0	0	0	0	4	0	9	0	28	0	0	0	0	9	0	0	7	12	0	15	10	8	14	0	0	0	9	0	7	0	4	0	0	0	0	16
ASV6376	Bacteria	Proteobacteria	Gammaproteobacteria	Burkholderiales	Nitrosomonadaceae	mle1-7	NA	0.995571	0	0	0	0	0	22	0	0	0	0	0	0	23	0	0	0	0	0	0	0	0	0	0	0	0	0	0	0	0	0	0	0	0	0	26	0	0	0	24	0	0
ASV841	Bacteria	Proteobacteria	Gammaproteobacteria	Burkholderiales	Nitrosomonadaceae	mle1-7	NA	0.987676	9	19	0	0	0	0	19	0	0	0	0	0	0	0	0	29	12	0	0	14	12	0	0	15	0	0	0	0	21	17	17	0	0	0	0	0	22	0	0	15	0
ASV614	Bacteria	Proteobacteria	Gammaproteobacteria	Burkholderiales	Nitrosomonadaceae	mle1-7	NA	0.966511	12	7	0	0	0	0	19	17	19	0	0	0	0	0	0	21	14	11	0	14	9	0	0	8	0	0	0	13	16	12	14	0	18	16	0	7	0	22	0	0	0
ASV838	Bacteria	Proteobacteria	Gammaproteobacteria	Burkholderiales	B1-7BS	norank_f__B1-7BS	uncultured_bacterium_g__norank_f__B1-7BS	0.87442	9	24	0	0	0	15	13	0	0	0	0	0	0	0	0	20	22	13	0	0	0	0	0	20	0	0	0	11	19	17	7	0	0	0	0	0	27	0	0	0	0
ASV872	Bacteria	Proteobacteria	Gammaproteobacteria	Burkholderiales	Methylophilaceae	Methylobacillus	NA	0.907291	8	22	0	0	0	12	29	0	11	0	0	0	9	0	0	18	25	11	0	8	25	0	0	0	0	0	0	0	11	15	17	0	8	0	9	11	20	12	9	7	0
ASV1453	Bacteria	Proteobacteria	Gammaproteobacteria	Burkholderiales	Methylophilaceae	Methylobacillus	uncultured_bacterium_g__Methylobacillus	0.804534	3	11	0	15	0	0	0	9	8	0	0	14	5	8	0	0	16	0	0	3	10	0	0	11	0	14	13	16	0	10	6	18	11	14	32	7	0	6	0	0	3
ASV134	Bacteria	Proteobacteria	Gammaproteobacteria	Burkholderiales	Methylophilaceae	MM2	NA	0.708403	29	29	0	32	18	14	49	16	8	10	0	30	18	15	14	42	67	13	0	8	33	43	0	12	0	22	0	12	0	23	42	37	14	104	12	8	57	26	13	27	27
ASV2147	Bacteria	Proteobacteria	Gammaproteobacteria	Burkholderiales	Methylophilaceae	Methylotenera	NA	0.945323	0	10	0	15	18	12	0	0	0	8	0	43	5	10	0	6	0	0	24	4	7	10	6	5	22	43	25	8	0	0	0	24	16	0	5	0	0	7	0	0	34
ASV28	Bacteria	Proteobacteria	Gammaproteobacteria	Burkholderiales	Methylophilaceae	Methylotenera	uncultured_soil_bacterium_g__Methylotenera	0.712646	67	36	20	6	0	16	56	22	24	0	8	5	21	20	0	47	133	31	4	18	41	6	8	6	0	0	0	0	26	38	34	8	12	6	15	13	49	44	12	15	0
ASV1599	Bacteria	Proteobacteria	Gammaproteobacteria	Burkholderiales	Methylophilaceae	Methylotenera	NA	0.906915	0	41	0	0	0	0	0	24	0	0	0	0	14	0	0	0	41	16	0	24	0	0	0	0	0	0	0	0	37	29	28	0	0	25	31	11	0	25	36	0	0
ASV430	Bacteria	Proteobacteria	Gammaproteobacteria	Burkholderiales	Methylophilaceae	Methylotenera	NA	0.814013	17	0	0	0	0	0	68	0	36	0	0	10	0	0	0	39	38	0	0	0	22	0	0	14	0	0	0	0	0	0	0	0	0	0	0	0	48	24	0	0	0
ASV4650	Bacteria	Proteobacteria	Gammaproteobacteria	Burkholderiales	Methylophilaceae	Methylotenera	NA	0.719294	0	0	0	30	0	0	0	0	0	0	0	0	0	7	0	0	38	0	21	0	0	0	0	0	0	14	0	0	0	0	0	0	0	0	0	0	0	0	0	15	0
ASV211	Bacteria	Proteobacteria	Gammaproteobacteria	Burkholderiales	Methylophilaceae	NA	NA	0.999998	24	14	0	0	0	0	32	8	12	0	0	0	25	0	0	0	34	9	0	0	32	0	0	0	0	0	0	0	11	12	0	0	0	0	0	0	46	16	0	0	0
ASV4740	Bacteria	Proteobacteria	Gammaproteobacteria	Burkholderiales	Methylophilaceae	Methylotenera	NA	0.986462	0	0	0	18	24	0	0	0	0	35	0	29	0	0	0	0	0	0	23	0	0	0	0	0	0	36	0	0	0	0	0	31	0	0	0	0	0	0	0	0	34
ASV515	Bacteria	Proteobacteria	Gammaproteobacteria	Burkholderiales	Burkholderiaceae	Limnobacter	uncultured_bacterium_g__Limnobacter	0.939424	14	16	0	0	0	14	16	0	27	0	0	0	11	0	0	19	12	7	0	5	7	0	0	7	0	0	0	12	17	11	11	0	10	7	0	9	15	18	0	11	0
ASV6796	Bacteria	Proteobacteria	Gammaproteobacteria	Burkholderiales	Sutterellaceae	norank_f__Sutterellaceae	NA	0.99999	0	0	0	0	0	0	12	0	0	0	0	0	0	0	0	17	21	9	0	0	12	0	0	14	0	0	0	0	0	0	23	0	0	0	0	0	13	0	11	0	0
ASV376	Bacteria	Proteobacteria	Gammaproteobacteria	Burkholderiales	Sutterellaceae	norank_f__Sutterellaceae	NA	0.99999	18	17	0	0	0	19	44	21	38	0	0	0	19	0	0	34	18	34	0	0	35	0	0	23	0	0	8	30	22	28	30	0	22	0	31	18	22	21	19	0	0
ASV9463	Bacteria	Proteobacteria	Gammaproteobacteria	Burkholderiales	Sutterellaceae	norank_f__Sutterellaceae	NA	0.999988	0	0	0	0	0	0	0	0	0	0	0	0	0	26	0	0	0	0	0	27	0	0	0	0	0	0	0	0	0	0	0	0	0	7	0	0	0	0	0	14	0
ASV6758	Bacteria	Proteobacteria	Gammaproteobacteria	Burkholderiales	Alcaligenaceae	Achromobacter	NA	0.940001	0	0	0	0	0	0	13	0	12	0	0	0	0	15	0	13	0	0	0	7	20	0	0	12	0	0	0	25	16	18	11	0	0	0	17	13	0	9	0	0	13
ASV1651	Bacteria	Proteobacteria	Gammaproteobacteria	Burkholderiales	Alcaligenaceae	Achromobacter	NA	0.902069	0	29	0	0	16	20	0	15	0	0	0	0	0	0	5	0	0	6	0	0	19	7	0	0	0	0	47	0	0	0	0	0	0	13	14	0	0	0	6	0	0
ASV1770	Bacteria	Proteobacteria	Gammaproteobacteria	Burkholderiales	Burkholderiaceae	Lautropia	NA	0.998592	0	20	7	9	25	17	0	0	0	20	0	7	16	16	14	34	30	12	11	0	0	15	10	23	12	13	29	0	0	0	0	0	0	0	35	0	0	18	13	0	22
ASV451	Bacteria	Proteobacteria	Gammaproteobacteria	Burkholderiales	Burkholderiaceae	Lautropia	NA	0.998162	16	0	0	0	0	0	9	17	0	0	0	0	0	0	0	0	0	0	0	0	0	0	0	0	0	0	0	25	0	19	0	0	16	0	21	18	0	0	0	0	0
ASV7620	Bacteria	Proteobacteria	Gammaproteobacteria	Burkholderiales	Burkholderiaceae	Lautropia	NA	0.997755	0	0	0	0	0	0	0	0	33	0	0	0	0	0	0	0	0	0	0	11	19	0	0	0	0	0	0	0	0	0	28	0	0	0	0	0	0	0	0	18	0
ASV3039	Bacteria	Proteobacteria	Gammaproteobacteria	Burkholderiales	Oxalobacteraceae	NA	NA	0.999741	0	0	47	24	0	0	0	0	0	0	0	33	0	39	20	0	0	0	31	0	0	0	0	0	38	20	31	0	0	0	0	0	0	0	0	0	0	0	0	0	46
ASV5574	Bacteria	Proteobacteria	Gammaproteobacteria	Burkholderiales	Oxalobacteraceae	NA	NA	0.999795	0	0	0	0	25	0	0	0	0	0	0	0	0	0	0	0	0	0	0	0	0	0	33	0	0	0	0	0	0	0	0	0	0	0	0	0	15	0	0	0	0
ASV1940	Bacteria	Proteobacteria	Gammaproteobacteria	Burkholderiales	Oxalobacteraceae	NA	NA	0.999778	0	15	0	0	113	0	0	0	0	0	0	0	7	0	0	0	0	0	0	0	0	26	0	11	0	0	27	0	0	0	0	0	0	0	0	0	0	0	0	0	0
ASV5580	Bacteria	Proteobacteria	Gammaproteobacteria	Burkholderiales	Oxalobacteraceae	Noviherbaspirillum	NA	0.748195	0	0	0	0	24	0	0	0	0	0	0	12	0	0	0	0	0	0	0	0	0	0	0	0	0	17	0	0	0	0	0	24	0	0	0	0	0	0	0	0	25
ASV3346	Bacteria	Proteobacteria	Gammaproteobacteria	Burkholderiales	Oxalobacteraceae	Noviherbaspirillum	NA	0.85679	0	0	20	16	0	0	0	0	0	0	24	25	0	0	0	0	0	0	0	0	0	0	18	0	17	11	12	0	0	0	0	0	0	0	0	0	0	0	0	0	0
ASV5693	Bacteria	Proteobacteria	Gammaproteobacteria	Burkholderiales	Oxalobacteraceae	Noviherbaspirillum	NA	0.855753	0	0	0	0	14	0	0	0	0	28	0	0	0	0	0	0	0	0	0	0	0	0	0	21	0	0	0	0	0	0	0	0	0	0	24	0	0	0	0	0	0
ASV3229	Bacteria	Proteobacteria	Gammaproteobacteria	Burkholderiales	Oxalobacteraceae	Noviherbaspirillum	NA	0.962976	0	0	25	0	8	0	0	0	0	16	0	8	0	14	0	0	0	0	4	0	0	0	20	0	7	9	0	0	0	0	0	0	0	0	0	0	0	0	0	0	10
ASV2177	Bacteria	Proteobacteria	Gammaproteobacteria	Burkholderiales	Burkholderiaceae	Cupriavidus	NA	0.99992	0	10	5	9	0	0	22	0	0	0	3	12	37	13	10	9	0	0	19	0	13	10	20	0	0	9	7	0	10	24	0	5	0	0	0	0	0	0	0	0	8
ASV1683	Bacteria	Proteobacteria	Gammaproteobacteria	Burkholderiales	Burkholderiaceae	Cupriavidus	NA	0.999865	0	25	0	0	0	0	22	0	11	0	0	0	0	0	0	18	9	29	0	0	16	0	0	0	0	0	0	0	15	0	13	0	0	0	0	15	0	20	0	0	0
ASV1960	Bacteria	Proteobacteria	Gammaproteobacteria	Burkholderiales	Burkholderiaceae	Cupriavidus	NA	0.999861	0	14	0	0	0	0	13	0	6	0	0	0	0	0	0	0	0	0	0	0	0	0	0	9	0	0	0	0	0	0	0	0	0	0	0	0	14	0	19	0	0
ASV6699	Bacteria	Proteobacteria	Gammaproteobacteria	Burkholderiales	Burkholderiaceae	Cupriavidus	NA	0.999872	0	0	0	0	0	0	18	18	0	0	0	0	0	0	0	0	0	18	0	15	17	0	0	0	0	0	0	0	0	20	0	0	0	0	0	0	0	14	0	0	0
ASV532	Bacteria	Proteobacteria	Gammaproteobacteria	Burkholderiales	Oxalobacteraceae	NA	NA	0.998777	14	14	0	0	0	0	0	0	0	0	0	0	0	0	0	12	18	18	0	17	0	0	0	11	0	0	0	25	22	26	0	0	0	0	10	0	0	15	20	0	0
ASV544	Bacteria	Proteobacteria	Gammaproteobacteria	Burkholderiales	Oxalobacteraceae	NA	NA	0.999972	14	72	0	0	0	0	0	37	0	0	0	0	17	0	0	0	44	0	0	0	65	0	0	0	0	0	0	0	0	0	31	0	10	51	27	18	0	0	18	0	0
ASV1936	Bacteria	Proteobacteria	Gammaproteobacteria	Burkholderiales	Comamonadaceae	Ramlibacter	NA	0.852253	0	15	0	0	0	0	21	0	0	16	0	0	0	0	0	0	0	0	0	0	14	24	0	0	0	25	0	0	0	0	0	30	0	0	0	0	8	0	0	0	53
ASV3415	Bacteria	Proteobacteria	Gammaproteobacteria	Burkholderiales	Comamonadaceae	Ramlibacter	NA	0.846973	0	0	18	55	26	0	0	0	0	0	28	23	0	37	22	0	0	0	28	0	0	0	18	0	28	0	16	0	0	0	0	41	0	0	29	0	0	0	0	0	0
ASV3347	Bacteria	Proteobacteria	Gammaproteobacteria	Burkholderiales	Comamonadaceae	NA	NA	1	0	0	20	26	30	33	0	0	25	0	0	0	0	0	18	34	26	13	39	0	0	31	24	0	20	0	35	0	29	42	28	60	27	40	0	0	43	0	0	34	0
ASV1820	Bacteria	Proteobacteria	Gammaproteobacteria	Burkholderiales	Comamonadaceae	Ramlibacter	NA	0.827104	0	18	0	0	0	0	0	0	0	0	0	0	0	0	0	0	23	0	0	0	0	0	26	0	0	0	0	29	0	0	0	0	0	0	25	0	0	25	26	0	40
ASV221	Bacteria	Proteobacteria	Gammaproteobacteria	Burkholderiales	Comamonadaceae	Variovorax	NA	0.735511	24	26	0	0	0	15	29	0	15	0	0	0	0	0	0	19	24	19	0	14	21	0	0	0	0	0	0	0	20	26	24	34	0	0	0	0	28	12	0	23	0
ASV3121	Bacteria	Proteobacteria	Gammaproteobacteria	Burkholderiales	Comamonadaceae	NA	NA	1	0	0	33	75	51	0	0	0	0	48	25	61	0	85	23	0	0	0	36	0	0	91	33	0	24	52	37	0	0	0	0	91	0	0	0	0	0	0	0	0	89
ASV229	Bacteria	Proteobacteria	Gammaproteobacteria	Burkholderiales	Comamonadaceae	NA	NA	1	24	22	0	0	0	19	11	27	0	0	0	0	26	34	10	24	30	15	0	30	16	0	0	38	0	0	10	34	15	9	16	0	0	11	15	39	18	16	21	11	0
ASV2059	Bacteria	Proteobacteria	Gammaproteobacteria	Burkholderiales	Comamonadaceae	Variovorax	NA	0.745888	0	12	0	0	0	15	17	35	32	0	0	0	21	24	0	0	0	28	0	16	23	0	0	0	0	0	0	0	29	29	18	0	0	0	11	0	7	0	26	0	0
ASV362	Bacteria	Proteobacteria	Gammaproteobacteria	Burkholderiales	Comamonadaceae	Variovorax	NA	0.849178	18	11	11	53	26	42	48	18	13	0	10	24	13	43	0	24	48	22	13	13	46	43	28	18	0	19	28	12	25	20	24	81	24	17	30	19	22	23	14	0	47
ASV3694	Bacteria	Proteobacteria	Gammaproteobacteria	Burkholderiales	Comamonadaceae	Variovorax	NA	0.940746	0	0	12	142	60	13	0	10	0	24	13	30	0	53	32	0	0	0	13	12	0	34	18	0	0	36	10	0	0	0	0	150	0	0	0	0	0	0	0	0	29
ASV48	Bacteria	Proteobacteria	Gammaproteobacteria	Burkholderiales	Comamonadaceae	Rhodoferax	NA	0.872663	46	29	0	0	0	0	27	12	10	0	0	0	0	0	0	35	66	23	0	0	20	0	0	0	0	0	0	0	14	11	0	0	0	0	0	0	43	19	0	0	0
ASV37	Bacteria	Proteobacteria	Gammaproteobacteria	Burkholderiales	Comamonadaceae	Polaromonas	NA	0.982178	53	52	0	19	7	32	123	62	23	0	0	12	45	10	0	61	126	76	11	51	63	5	0	20	12	11	0	16	44	101	45	32	28	0	15	29	96	52	40	37	0
ASV9138	Bacteria	Proteobacteria	Gammaproteobacteria	Burkholderiales	Comamonadaceae	Polaromonas	NA	0.947934	0	0	0	0	0	0	0	0	0	0	0	0	16	0	0	19	0	21	0	19	21	0	0	5	0	0	0	0	0	0	17	0	8	0	14	0	22	0	0	0	0
ASV3361	Bacteria	Proteobacteria	Gammaproteobacteria	Burkholderiales	Comamonadaceae	Caenimonas	NA	0.753681	0	0	19	31	30	0	0	0	0	16	20	44	0	35	18	0	0	0	24	0	0	29	33	0	39	37	20	0	0	0	0	36	0	0	0	0	0	0	0	0	34
ASV749	Bacteria	Proteobacteria	Gammaproteobacteria	Burkholderiales	Comamonadaceae	Caenimonas	NA	0.992568	10	8	0	24	16	0	0	0	0	7	0	20	0	16	0	0	12	0	12	10	0	17	31	15	24	10	0	22	10	0	0	30	0	0	0	12	13	15	0	0	29
ASV1785	Bacteria	Proteobacteria	Gammaproteobacteria	Burkholderiales	Comamonadaceae	Caenimonas	NA	0.919884	0	19	11	0	0	0	0	10	10	15	0	8	0	10	13	10	10	6	16	0	15	0	0	14	19	8	32	12	0	8	12	14	0	12	39	0	9	10	13	0	20
ASV4624	Bacteria	Proteobacteria	Gammaproteobacteria	Burkholderiales	Comamonadaceae	NA	NA	0.999999	0	0	0	45	0	0	11	20	32	0	0	0	0	0	0	0	40	27	0	0	23	0	0	0	17	0	0	0	0	18	0	44	0	0	0	0	20	16	0	0	0
ASV1606	Bacteria	Proteobacteria	Gammaproteobacteria	Burkholderiales	Comamonadaceae	Caenimonas	NA	0.90832	0	38	0	0	0	0	28	0	0	0	0	0	0	0	0	0	17	0	0	16	0	0	0	27	0	0	0	0	32	0	0	0	0	38	0	0	0	0	28	0	0
ASV3673	Bacteria	Proteobacteria	Gammaproteobacteria	Burkholderiales	Comamonadaceae	NA	NA	0.999999	0	0	12	40	30	0	0	0	0	0	0	0	0	28	15	0	0	0	21	0	0	33	23	0	0	43	19	0	0	0	0	56	0	0	0	0	0	0	0	0	20
ASV130	Bacteria	Proteobacteria	Gammaproteobacteria	Burkholderiales	Comamonadaceae	NA	NA	1	30	0	0	29	0	0	0	0	0	0	0	13	20	0	0	32	14	0	0	0	0	0	0	0	0	0	19	22	0	19	0	37	0	0	0	0	30	0	0	0	36
ASV7619	Bacteria	Proteobacteria	Gammaproteobacteria	Burkholderiales	Comamonadaceae	Ramlibacter	NA	0.731504	0	0	0	0	0	0	0	0	34	0	0	0	0	0	0	0	0	0	0	0	10	0	0	0	0	0	27	0	0	0	0	0	0	11	0	0	0	0	0	0	16
ASV13683	Bacteria	Proteobacteria	Gammaproteobacteria	Burkholderiales	Comamonadaceae	Ramlibacter	NA	0.714424	0	0	0	0	0	0	0	0	0	0	0	0	0	0	0	0	0	0	0	0	0	0	0	0	0	0	43	0	0	0	44	0	0	0	44	0	0	0	0	0	0
ASV3165	Bacteria	Proteobacteria	Gammaproteobacteria	Burkholderiales	Comamonadaceae	NA	NA	1	0	0	30	26	25	0	0	0	0	0	0	0	0	37	25	0	0	0	0	0	0	0	19	0	0	17	0	0	0	0	0	30	0	0	0	0	0	0	0	22	38
ASV3052	Bacteria	Proteobacteria	Gammaproteobacteria	Burkholderiales	Comamonadaceae	Ramlibacter	NA	0.871471	0	0	43	31	0	0	0	0	0	0	0	34	0	26	0	0	0	0	0	0	0	45	27	0	43	0	0	0	0	0	0	53	0	0	0	0	0	0	0	0	49
ASV4731	Bacteria	Proteobacteria	Gammaproteobacteria	Burkholderiales	Comamonadaceae	Ramlibacter	NA	0.898598	0	0	0	19	31	0	0	0	0	0	0	0	0	0	0	0	0	0	0	0	0	21	0	0	0	0	0	0	0	0	0	0	0	0	0	0	0	0	0	0	0
ASV8082	Bacteria	Proteobacteria	Gammaproteobacteria	Burkholderiales	Comamonadaceae	Ramlibacter	NA	0.861155	0	0	0	0	0	0	0	0	0	53	43	33	0	40	0	0	0	0	0	0	0	0	0	0	0	0	0	0	0	0	0	0	0	0	0	0	0	0	0	0	46
ASV3592	Bacteria	Proteobacteria	Gammaproteobacteria	Burkholderiales	Comamonadaceae	Ramlibacter	NA	0.894477	0	0	14	18	16	0	0	0	0	18	0	29	0	25	21	0	0	0	23	0	8	18	27	32	20	34	14	17	0	27	0	24	0	0	0	0	0	0	19	0	26
ASV6629	Bacteria	Proteobacteria	Gammaproteobacteria	Burkholderiales	Comamonadaceae	Ramlibacter	NA	0.807702	0	0	0	0	0	0	42	0	0	0	0	0	0	0	0	0	53	0	33	33	12	0	0	0	0	28	0	0	49	0	0	0	0	19	0	0	30	37	0	0	0
ASV6339	Bacteria	Proteobacteria	Gammaproteobacteria	Burkholderiales	Comamonadaceae	Ramlibacter	NA	0.887588	0	0	0	0	0	38	0	0	0	0	0	0	0	0	0	56	0	0	0	0	0	0	0	0	0	0	0	0	0	0	0	0	0	0	0	0	0	0	0	0	0
ASV8574	Bacteria	Proteobacteria	Gammaproteobacteria	Burkholderiales	Comamonadaceae	Ramlibacter	NA	0.838175	0	0	0	0	0	0	0	0	0	0	0	35	0	0	0	0	0	0	25	0	0	0	0	0	0	22	0	0	0	0	0	0	0	0	0	0	0	0	0	0	0
ASV3419	Bacteria	Proteobacteria	Gammaproteobacteria	Burkholderiales	Comamonadaceae	Ramlibacter	NA	0.824238	0	0	18	0	24	0	0	0	0	0	0	0	0	0	0	0	0	0	0	0	0	25	30	0	27	0	0	0	0	0	0	0	0	0	0	0	0	0	0	0	43
ASV4646	Bacteria	Proteobacteria	Gammaproteobacteria	Burkholderiales	Comamonadaceae	Ramlibacter	NA	0.876078	0	0	0	31	0	0	0	0	0	0	0	22	0	36	21	0	0	0	16	0	0	19	0	33	0	0	26	29	0	0	0	34	0	0	0	19	0	0	0	0	0
ASV225	Bacteria	Proteobacteria	Gammaproteobacteria	Burkholderiales	Comamonadaceae	NA	NA	1	24	18	0	0	0	0	31	0	0	0	0	0	40	0	0	14	0	22	0	0	13	0	0	0	0	0	0	0	0	21	11	0	0	32	16	0	21	11	22	0	0
ASV212	Bacteria	Proteobacteria	Gammaproteobacteria	Burkholderiales	Comamonadaceae	Hydrogenophaga	NA	0.956075	24	27	0	0	0	12	53	10	0	0	0	0	29	0	0	30	59	16	0	12	22	0	0	0	0	0	0	0	18	28	9	0	17	0	0	0	25	29	0	0	0
ASV3675	Bacteria	Proteobacteria	Gammaproteobacteria	Burkholderiales	Comamonadaceae	Rhizobacter	NA	0.939849	0	0	12	20	17	0	0	0	0	0	0	0	0	12	0	0	0	0	0	0	0	11	0	0	19	0	16	0	0	0	0	28	0	0	0	0	0	0	0	0	20
ASV1815	Bacteria	Proteobacteria	Gammaproteobacteria	Burkholderiales	Comamonadaceae	Rhizobacter	NA	0.993162	0	18	0	27	0	0	33	31	47	0	0	35	14	20	0	16	30	16	0	26	25	29	29	53	0	20	0	13	42	39	19	0	16	0	12	15	39	36	31	0	34
ASV537	Bacteria	Proteobacteria	Gammaproteobacteria	Burkholderiales	Comamonadaceae	Rhizobacter	NA	0.968062	14	16	0	0	0	19	30	12	0	0	0	0	19	0	0	14	0	0	18	0	0	0	0	0	0	14	0	0	0	19	22	0	0	0	0	14	0	0	0	0	0
ASV3116	Bacteria	Proteobacteria	Gammaproteobacteria	Burkholderiales	Comamonadaceae	NA	NA	0.999963	0	0	33	42	0	0	21	21	0	24	43	29	0	19	16	0	0	0	30	0	0	23	23	0	19	22	42	0	0	20	0	30	0	0	0	0	17	32	15	23	36
ASV3891	Bacteria	Proteobacteria	Gammaproteobacteria	Burkholderiales	Comamonadaceae	NA	NA	0.999961	0	0	9	19	18	0	0	0	0	16	0	21	0	12	0	0	0	0	0	0	0	0	15	0	10	0	0	0	0	0	0	16	0	0	0	0	0	0	0	0	15
ASV422	Bacteria	Proteobacteria	Gammaproteobacteria	Burkholderiales	Comamonadaceae	NA	NA	0.999922	17	24	0	0	0	15	0	0	21	0	0	0	21	0	0	31	33	0	0	0	22	0	0	14	0	0	0	11	0	0	27	0	0	43	0	0	0	0	0	0	0
ASV8612	Bacteria	Proteobacteria	Gammaproteobacteria	Burkholderiales	Comamonadaceae	NA	NA	0.999983	0	0	0	0	0	0	0	0	0	0	0	17	0	13	0	0	0	0	0	0	0	0	0	0	22	0	0	0	0	0	0	16	0	0	0	0	0	0	0	0	23
ASV2002	Bacteria	Proteobacteria	Gammaproteobacteria	Burkholderiales	Comamonadaceae	Azohydromonas	NA	0.791228	0	13	0	0	0	17	28	0	0	0	0	0	0	0	0	0	0	12	0	0	15	0	0	0	0	0	0	0	0	16	0	0	0	18	0	0	12	38	0	0	0
ASV1703	Bacteria	Proteobacteria	Gammaproteobacteria	Burkholderiales	Comamonadaceae	NA	NA	0.999989	0	24	0	0	0	0	15	22	27	0	0	0	0	0	0	29	21	22	0	16	0	0	0	16	0	0	0	0	21	17	19	0	0	0	22	0	18	0	27	0	0
ASV6679	Bacteria	Proteobacteria	Gammaproteobacteria	Burkholderiales	Comamonadaceae	NA	NA	0.999985	0	0	0	0	0	0	20	0	14	0	0	0	11	0	0	0	0	0	0	0	17	0	0	0	0	0	0	0	13	10	0	0	17	0	0	0	20	10	0	20	0
ASV3447	Bacteria	Proteobacteria	Gammaproteobacteria	Burkholderiales	Comamonadaceae	NA	NA	0.99998	0	0	17	37	0	0	0	0	0	0	0	36	0	29	24	0	0	0	32	0	0	26	20	0	18	29	16	0	0	0	0	18	0	0	0	0	0	0	0	0	33
ASV1685	Bacteria	Proteobacteria	Gammaproteobacteria	Burkholderiales	Comamonadaceae	NA	NA	0.999982	0	25	0	0	0	0	40	0	16	0	0	10	0	16	0	53	47	19	0	12	36	0	13	16	0	0	0	13	33	24	26	20	27	0	0	15	35	31	14	0	25
ASV3505	Bacteria	Proteobacteria	Gammaproteobacteria	Burkholderiales	Comamonadaceae	NA	NA	0.999995	0	0	16	14	27	0	0	0	0	25	0	22	0	35	0	0	0	0	37	0	0	19	25	0	0	16	17	0	0	0	0	14	0	0	0	0	0	0	0	0	16
ASV350	Bacteria	Proteobacteria	Gammaproteobacteria	Burkholderiales	Comamonadaceae	NA	NA	0.999994	19	36	0	0	0	39	18	0	0	0	0	0	24	0	0	39	0	27	0	31	23	0	0	32	0	0	0	0	25	30	0	0	0	0	26	0	0	29	21	0	0
ASV6694	Bacteria	Proteobacteria	Gammaproteobacteria	Burkholderiales	Comamonadaceae	Methylibium	uncultured_bacterium_g__Methylibium	0.707289	0	0	0	0	0	0	18	20	0	0	0	0	0	0	0	0	21	11	0	0	0	0	0	0	0	0	0	0	0	0	0	0	0	22	0	0	7	6	0	0	0
ASV804	Bacteria	Proteobacteria	Gammaproteobacteria	Burkholderiales	Comamonadaceae	Rhizobacter	NA	0.907885	9	22	0	0	0	12	23	0	11	0	0	0	16	0	0	17	33	12	0	26	19	0	0	0	0	0	0	0	26	27	0	0	9	15	0	5	18	10	20	0	0
ASV4657	Bacteria	Proteobacteria	Gammaproteobacteria	Burkholderiales	Comamonadaceae	NA	NA	0.999991	0	0	0	28	0	0	0	0	0	0	0	21	0	30	0	0	0	0	0	0	0	17	36	0	19	14	0	0	0	0	0	28	0	0	0	0	0	0	0	0	30
ASV3266	Bacteria	Proteobacteria	Gammaproteobacteria	Burkholderiales	Comamonadaceae	NA	NA	0.99999	0	0	23	0	0	0	0	0	0	0	0	0	0	0	23	0	0	0	0	0	0	0	0	0	0	0	40	0	0	0	0	0	0	0	0	0	0	0	0	0	0
ASV4958	Bacteria	Proteobacteria	Gammaproteobacteria	Burkholderiales	Comamonadaceae	Piscinibacter	NA	0.97131	0	0	0	10	0	0	21	0	31	0	0	0	0	0	0	0	0	0	0	0	12	0	0	0	0	0	0	0	17	0	0	0	24	0	0	0	0	0	0	0	0
ASV511	Bacteria	Proteobacteria	Gammaproteobacteria	Burkholderiales	Comamonadaceae	NA	NA	0.999885	14	11	18	0	18	14	30	9	12	0	0	12	9	45	20	23	17	17	23	12	22	22	24	15	0	0	20	22	29	19	24	26	15	0	11	9	21	0	11	14	29
ASV8573	Bacteria	Proteobacteria	Gammaproteobacteria	Burkholderiales	Oxalobacteraceae	Massilia	NA	0.94802	0	0	0	0	0	0	0	0	0	0	0	36	0	0	0	0	0	0	0	0	0	0	0	0	0	41	0	0	0	0	0	35	0	35	0	0	0	0	0	0	0
ASV8095	Bacteria	Proteobacteria	Gammaproteobacteria	Burkholderiales	Oxalobacteraceae	Massilia	NA	0.934333	0	0	0	0	0	0	0	0	0	26	0	0	0	22	0	0	0	0	0	0	0	0	0	0	0	0	0	0	0	0	0	28	0	0	62	0	0	0	0	0	25
ASV109	Bacteria	Proteobacteria	Gammaproteobacteria	Burkholderiales	Oxalobacteraceae	Massilia	NA	0.933405	33	0	28	0	0	0	33	0	0	0	0	33	22	0	0	0	23	21	0	0	33	0	43	59	32	0	0	40	0	43	42	0	0	30	0	30	41	0	0	27	66
ASV4611	Bacteria	Proteobacteria	Gammaproteobacteria	Burkholderiales	Oxalobacteraceae	Massilia	NA	0.951411	0	0	0	68	33	0	0	0	0	42	0	0	0	46	39	0	0	0	68	0	0	38	0	0	0	56	45	0	0	0	0	97	0	0	0	0	0	0	0	0	0
ASV3151	Bacteria	Proteobacteria	Gammaproteobacteria	Burkholderiales	Oxalobacteraceae	Massilia	NA	0.862383	0	0	31	0	0	0	0	0	0	0	0	47	0	0	0	0	0	0	0	0	0	0	0	0	0	0	0	0	0	0	0	0	0	0	0	0	0	0	0	0	0
ASV4631	Bacteria	Proteobacteria	Gammaproteobacteria	Burkholderiales	Oxalobacteraceae	Massilia	NA	0.925327	0	0	0	35	0	0	0	0	0	17	0	0	0	25	0	0	40	0	0	0	0	0	0	41	22	25	0	0	0	0	0	31	0	0	21	0	0	0	0	0	0
ASV8086	Bacteria	Proteobacteria	Gammaproteobacteria	Burkholderiales	Oxalobacteraceae	Massilia	NA	0.837805	0	0	0	0	0	0	0	0	0	33	0	0	0	26	0	0	39	0	0	0	0	0	0	0	37	0	0	50	0	0	27	30	0	41	48	0	0	0	0	0	0
ASV26	Bacteria	Proteobacteria	Gammaproteobacteria	Burkholderiales	Oxalobacteraceae	Massilia	NA	0.929111	71	74	0	0	74	0	0	0	68	0	0	80	56	82	0	95	127	45	60	70	74	79	0	95	77	76	72	77	58	91	97	0	0	0	107	67	129	70	119	0	0
ASV9	Bacteria	Proteobacteria	Gammaproteobacteria	Burkholderiales	Oxalobacteraceae	Massilia	NA	0.939612	113	89	66	145	97	38	67	88	51	130	112	133	0	124	75	113	150	45	130	48	91	109	88	107	0	121	78	68	62	85	102	221	56	120	97	74	100	100	0	75	108
ASV1998	Bacteria	Proteobacteria	Gammaproteobacteria	Burkholderiales	Oxalobacteraceae	Massilia	NA	0.915266	0	13	0	10	0	0	14	0	11	0	0	5	0	0	0	0	12	8	0	0	17	0	0	6	0	0	0	0	0	10	12	0	0	0	0	0	20	17	0	0	9
ASV248	Bacteria	Proteobacteria	Gammaproteobacteria	Burkholderiales	Oxalobacteraceae	NA	NA	0.999984	23	0	0	0	0	0	0	0	0	0	0	0	0	0	0	14	30	0	0	12	0	0	0	0	0	0	0	0	0	0	0	0	12	0	0	0	7	0	0	0	0
ASV358	Bacteria	Proteobacteria	Gammaproteobacteria	Burkholderiales	Oxalobacteraceae	NA	NA	0.99901	18	0	0	0	0	7	15	0	14	0	0	0	0	0	0	27	25	12	0	0	0	0	0	0	0	0	0	0	0	9	0	0	20	0	0	0	0	0	0	18	0
ASV3048	Bacteria	Proteobacteria	Gammaproteobacteria	Burkholderiales	Oxalobacteraceae	Duganella	NA	0.741557	0	0	44	26	0	0	0	0	0	9	0	0	0	66	0	0	0	0	26	0	0	0	32	0	0	12	0	0	0	0	0	20	0	0	0	0	0	0	0	0	29
ASV3031	Bacteria	Proteobacteria	Gammaproteobacteria	Burkholderiales	Oxalobacteraceae	Massilia	NA	0.994032	0	0	51	0	0	0	0	0	0	0	0	28	0	0	0	0	0	0	0	0	0	0	0	0	22	0	0	0	0	0	0	0	0	0	0	0	0	0	0	0	45
ASV651	Bacteria	Proteobacteria	Gammaproteobacteria	Burkholderiales	Oxalobacteraceae	Massilia	NA	0.994629	12	0	0	0	0	0	0	0	0	0	0	0	0	0	0	0	0	0	0	0	0	0	0	0	0	0	0	0	0	0	0	0	0	0	0	0	0	0	0	0	0
ASV8634	Bacteria	Proteobacteria	Gammaproteobacteria	Burkholderiales	Oxalobacteraceae	Massilia	NA	0.995151	0	0	0	0	0	0	0	0	0	0	0	14	0	0	0	0	0	0	0	0	0	0	0	0	0	0	0	0	0	0	0	0	0	0	0	0	0	0	0	0	20
ASV3496	Bacteria	Proteobacteria	Gammaproteobacteria	Burkholderiales	Oxalobacteraceae	Massilia	NA	0.990497	0	0	16	12	0	0	0	0	0	16	16	12	0	0	0	0	0	0	0	0	0	0	0	0	13	14	18	0	0	0	0	0	0	0	0	0	17	0	18	0	69
ASV9966	Bacteria	Proteobacteria	Gammaproteobacteria	Burkholderiales	Oxalobacteraceae	Massilia	NA	0.880237	0	0	0	0	0	0	0	0	0	0	0	0	0	0	29	0	0	0	0	0	0	0	130	0	0	0	0	38	0	0	0	0	0	0	0	0	0	0	0	0	0
ASV8572	Bacteria	Proteobacteria	Gammaproteobacteria	Burkholderiales	Oxalobacteraceae	Massilia	NA	0.898371	0	0	0	0	0	0	0	0	0	0	0	39	0	0	0	45	46	0	0	0	0	0	78	69	0	0	0	96	0	0	0	0	0	34	60	0	0	0	0	0	0
ASV9964	Bacteria	Proteobacteria	Gammaproteobacteria	Burkholderiales	Oxalobacteraceae	Massilia	NA	0.857921	0	0	0	0	0	0	0	0	0	0	0	0	0	0	63	0	0	0	0	0	0	0	76	0	0	0	0	0	0	0	0	0	0	0	0	0	0	0	21	0	47
ASV1100	Bacteria	Proteobacteria	Gammaproteobacteria	Burkholderiales	Oxalobacteraceae	Massilia	NA	0.947126	6	0	0	0	6	0	0	0	0	0	0	0	0	0	0	0	19	0	0	0	0	0	0	0	32	0	25	16	0	0	0	19	0	0	0	0	0	0	0	0	0
ASV3490	Bacteria	Proteobacteria	Gammaproteobacteria	Burkholderiales	Oxalobacteraceae	NA	NA	0.999991	0	0	16	25	0	0	0	0	0	0	22	29	0	24	0	0	0	0	28	0	0	0	0	0	35	0	0	0	0	0	0	8	0	0	0	0	0	0	0	0	0
ASV13034	Bacteria	Proteobacteria	Gammaproteobacteria	Burkholderiales	Nitrosomonadaceae	Nitrosomonas	Nitrosomonas_communis	0.999931	0	0	0	0	0	0	0	0	0	0	0	0	0	0	0	0	0	0	0	0	0	0	0	22	0	0	0	0	19	0	0	0	0	17	12	0	0	15	0	0	0
ASV863	Bacteria	Proteobacteria	Gammaproteobacteria	Burkholderiales	Nitrosomonadaceae	Nitrosomonas	Nitrosomonas_communis	0.997385	8	18	0	0	0	11	20	13	17	0	0	0	13	0	0	21	15	11	0	20	13	0	0	0	0	0	0	11	0	11	20	0	7	17	0	8	27	12	20	9	0
ASV2087	Bacteria	Verrucomicrobiota	Chlamydiae	Chlamydiales	Parachlamydiaceae	Candidatus_Protochlamydia	NA	0.863786	0	11	0	0	0	8	6	7	0	0	0	0	0	0	0	0	0	14	0	19	12	0	0	0	0	0	0	0	0	0	10	0	0	4	0	10	0	0	0	0	0
ASV1266	Bacteria	Verrucomicrobiota	Chlamydiae	Chlamydiales	Parachlamydiaceae	NA	NA	0.998569	4	5	0	0	0	6	2	0	0	0	0	0	0	0	0	10	22	6	0	4	21	0	0	6	0	0	0	0	3	30	0	0	2	0	3	4	10	13	5	6	0
ASV592	Bacteria	Deinococcota	Deinococci	Deinococcales	Trueperaceae	Truepera	uncultured_Deinococcales_bacterium	0.943198	12	0	0	0	0	0	6	4	7	0	2	6	0	3	2	4	22	0	0	0	17	0	0	36	8	7	3	27	0	9	11	0	4	7	16	7	17	4	0	4	4
ASV855	Bacteria	Patescibacteria	Saccharimonadia	Saccharimonadales	norank_o__Saccharimonadales	norank_f__norank_o__Saccharimonadales	uncultured_bacterium_g__norank_f__norank_o__Saccharimonadales	0.707178	8	19	0	0	0	28	11	28	4	0	0	0	7	0	0	20	4	22	0	67	18	0	0	2	0	0	0	12	45	6	46	0	29	0	12	41	37	0	12	26	0
ASV1501	Bacteria	Patescibacteria	Saccharimonadia	Saccharimonadales	norank_o__Saccharimonadales	norank_f__norank_o__Saccharimonadales	NA	0.996012	2	17	0	0	3	11	22	11	0	0	0	0	0	0	0	16	9	14	0	13	13	0	0	2	0	0	0	3	30	10	18	0	22	0	0	18	20	5	14	6	0
ASV3600	Bacteria	Patescibacteria	Saccharimonadia	Saccharimonadales	norank_o__Saccharimonadales	norank_f__norank_o__Saccharimonadales	NA	0.896918	0	0	13	0	0	0	0	0	6	0	0	0	0	0	0	19	14	0	0	0	25	0	0	28	6	10	0	0	0	15	14	6	0	0	0	19	22	0	34	0	0
ASV180	Bacteria	Patescibacteria	Saccharimonadia	Saccharimonadales	norank_o__Saccharimonadales	norank_f__norank_o__Saccharimonadales	NA	0.911397	26	0	0	0	0	0	0	0	0	0	0	0	0	0	0	0	0	0	0	0	0	0	0	0	0	0	0	26	0	0	0	0	0	0	27	0	0	24	0	0	0
ASV12873	Bacteria	Patescibacteria	Saccharimonadia	Saccharimonadales	norank_o__Saccharimonadales	norank_f__norank_o__Saccharimonadales	NA	0.900701	0	0	0	0	0	0	0	0	0	0	0	0	0	0	0	0	0	0	0	0	0	0	6	23	0	0	0	0	0	0	6	0	0	0	0	0	16	0	0	0	0
ASV11	Bacteria	Patescibacteria	Saccharimonadia	Saccharimonadales	Saccharimonadaceae	TM7a	uncultured_bacterium_g__TM7a	0.735792	104	22	0	0	0	11	20	26	17	0	0	0	15	0	0	69	227	31	0	11	30	0	0	6	0	0	0	0	14	11	36	0	20	29	0	0	35	31	8	43	0
ASV3518	Bacteria	Patescibacteria	Saccharimonadia	Saccharimonadales	Saccharimonadaceae	TM7a	uncultured_bacterium_g__TM7a	0.994374	0	0	15	12	8	0	0	0	0	0	5	3	0	0	0	0	0	0	0	0	0	8	8	0	11	15	15	0	0	0	0	14	0	0	0	0	0	0	0	0	4
ASV474	Bacteria	Patescibacteria	Saccharimonadia	Saccharimonadales	norank_o__Saccharimonadales	norank_f__norank_o__Saccharimonadales	unclassified_g__norank_f__norank_o__Saccharimonadales	0.836382	15	22	8	0	0	0	0	16	0	0	0	0	0	0	0	0	11	10	0	0	20	0	0	38	0	38	0	31	0	0	9	0	0	15	0	18	37	33	27	9	0
ASV3474	Bacteria	Patescibacteria	Saccharimonadia	Saccharimonadales	norank_o__Saccharimonadales	norank_f__norank_o__Saccharimonadales	unclassified_g__norank_f__norank_o__Saccharimonadales	0.922162	0	0	16	514	230	0	0	0	0	25	54	44	0	136	18	0	0	0	16	0	0	195	69	0	44	47	21	0	0	0	0	583	0	0	0	0	0	0	0	0	104
ASV4007	Bacteria	Patescibacteria	Saccharimonadia	Saccharimonadales	norank_o__Saccharimonadales	norank_f__norank_o__Saccharimonadales	NA	0.986445	0	0	7	8	0	0	0	0	0	10	0	26	0	20	4	0	0	0	0	0	0	9	6	0	7	0	12	0	0	0	0	30	0	0	0	0	0	0	0	0	12
ASV4052	Bacteria	Patescibacteria	Saccharimonadia	Saccharimonadales	LWQ8	norank_f__LWQ8	NA	0.747034	0	0	7	37	0	0	0	0	0	0	0	4	0	0	0	0	0	0	0	0	0	9	26	0	0	0	14	0	0	0	0	10	0	0	0	0	0	0	0	0	16
ASV4661	Bacteria	Patescibacteria	Saccharimonadia	Saccharimonadales	LWQ8	norank_f__LWQ8	NA	0.845187	0	0	0	27	6	0	0	0	0	3	0	0	0	0	0	0	0	0	10	0	0	23	0	0	0	0	17	0	0	0	0	24	0	0	0	0	0	0	0	0	20
ASV150	Bacteria	Patescibacteria	Saccharimonadia	Saccharimonadales	norank_o__Saccharimonadales	norank_f__norank_o__Saccharimonadales	NA	0.810128	28	11	0	0	0	3	4	17	25	0	0	0	6	2	0	6	33	13	0	16	32	0	0	61	0	0	0	57	7	16	21	0	4	5	53	21	27	22	31	7	0
ASV1446	Bacteria	Patescibacteria	Saccharimonadia	Saccharimonadales	LWQ8	norank_f__LWQ8	uncultured_bacterium_g__norank_f__LWQ8	0.746961	3	0	0	0	0	8	7	0	3	0	0	0	3	0	0	0	5	9	0	23	0	0	0	3	0	0	0	0	0	6	2	0	6	0	39	11	0	7	0	0	0
ASV9649	Bacteria	Patescibacteria	Saccharimonadia	Saccharimonadales	LWQ8	norank_f__LWQ8	uncultured_bacterium_g__norank_f__LWQ8	0.807453	0	0	0	0	0	0	0	0	0	0	0	0	0	7	0	0	0	0	0	0	0	0	0	0	0	0	0	0	0	0	0	134	0	0	0	0	0	0	0	0	13
ASV4606	Bacteria	Patescibacteria	Saccharimonadia	Saccharimonadales	LWQ8	norank_f__LWQ8	NA	0.97213	0	0	0	94	33	0	0	0	0	0	21	21	0	85	0	0	0	0	0	0	0	0	0	0	70	19	0	0	0	0	0	0	0	0	0	0	0	0	0	0	0
ASV10124	Bacteria	Patescibacteria	Saccharimonadia	Saccharimonadales	LWQ8	norank_f__LWQ8	uncultured_bacterium_g__norank_f__LWQ8	0.986192	0	0	0	0	0	0	0	0	0	0	0	0	0	0	0	50	22	0	0	0	0	0	0	0	0	0	0	0	0	0	0	0	0	0	0	0	0	0	0	0	0
ASV6458	Bacteria	Patescibacteria	Saccharimonadia	Saccharimonadales	LWQ8	norank_f__LWQ8	uncultured_bacterium_g__norank_f__LWQ8	0.98626	0	0	0	0	0	10	0	0	24	0	0	0	12	0	0	0	0	0	0	0	0	0	0	0	0	0	0	27	0	0	23	0	0	0	0	0	0	0	0	30	0
ASV2342	Bacteria	Patescibacteria	Saccharimonadia	Saccharimonadales	norank_o__Saccharimonadales	norank_f__norank_o__Saccharimonadales	Candidatus_Saccharibacteria_bacterium_RIFCSPHIGHO2_12_FULL_48_21	0.997399	0	7	0	0	0	0	30	4	13	0	0	0	15	0	0	12	6	0	0	0	7	0	0	8	0	0	0	0	0	21	15	0	8	0	0	0	39	13	3	9	0
ASV2044	Bacteria	Chloroflexi	Anaerolineae	SBR1031	norank_o__SBR1031	norank_f__norank_o__SBR1031	uncultured_bacterium_g__norank_f__norank_o__SBR1031	0.809791	0	12	0	0	0	0	13	9	0	0	0	0	10	0	0	20	18	0	0	15	29	0	0	9	0	0	0	0	0	23	20	0	0	0	0	0	39	10	0	4	0
ASV1746	Bacteria	Chloroflexi	Anaerolineae	SBR1031	norank_o__SBR1031	norank_f__norank_o__SBR1031	uncultured_bacterium_g__norank_f__norank_o__SBR1031	0.774666	0	21	0	0	0	9	0	0	21	0	0	0	0	0	0	9	15	15	0	7	43	0	0	0	0	0	0	0	9	27	10	0	0	8	0	9	24	12	5	0	0
ASV1031	Bacteria	Chloroflexi	Anaerolineae	SBR1031	norank_o__SBR1031	norank_f__norank_o__SBR1031	uncultured_bacterium_g__norank_f__norank_o__SBR1031	0.719562	6	7	0	0	17	0	0	12	0	0	4	0	0	9	7	19	13	0	0	13	13	7	0	29	5	0	0	20	11	11	13	0	13	0	7	18	14	15	0	7	19
ASV939	Bacteria	Chloroflexi	Anaerolineae	SBR1031	norank_o__SBR1031	norank_f__norank_o__SBR1031	uncultured_Gemmatimonadetes_bacterium_g__norank_f__norank	0.753837	7	5	0	0	0	0	8	0	14	0	0	0	10	0	0	11	9	8	0	11	16	0	0	9	0	0	0	0	0	13	11	0	0	3	0	6	18	11	0	9	0
ASV562	Bacteria	Chloroflexi	Anaerolineae	SBR1031	norank_o__SBR1031	norank_f__norank_o__SBR1031	uncultured_bacterium_g__norank_f__norank_o__SBR1031	0.852566	13	18	0	0	0	0	7	8	32	0	0	0	0	0	0	43	24	9	0	0	28	0	0	8	0	0	0	14	11	33	24	0	24	27	8	21	12	23	0	0	0
ASV4640	Bacteria	Chloroflexi	Anaerolineae	SBR1031	norank_o__SBR1031	norank_f__norank_o__SBR1031	uncultured_bacterium_g__norank_f__norank_o__SBR1031	0.917809	0	0	0	32	27	0	0	0	0	0	0	28	0	0	0	0	0	0	0	0	0	0	0	0	0	0	0	0	0	0	0	24	0	0	0	0	0	0	0	0	24
ASV7764	Bacteria	Chloroflexi	Anaerolineae	SBR1031	norank_o__SBR1031	norank_f__norank_o__SBR1031	uncultured_soil_bacterium_g__norank_f__norank_o__SBR1031	0.999966	0	0	0	0	0	0	0	0	10	0	0	0	11	0	0	15	0	0	0	0	22	0	0	14	0	0	0	9	9	18	0	0	7	0	0	10	19	0	0	15	0
ASV513	Bacteria	Chloroflexi	Anaerolineae	SBR1031	norank_o__SBR1031	norank_f__norank_o__SBR1031	uncultured_soil_bacterium_g__norank_f__norank_o__SBR1031	0.999991	14	0	0	9	6	0	0	0	19	0	0	0	0	3	0	20	13	0	0	0	0	0	0	0	0	0	0	0	0	0	23	0	0	0	0	0	14	16	0	9	0
ASV205	Bacteria	Chloroflexi	Anaerolineae	SBR1031	norank_o__SBR1031	norank_f__norank_o__SBR1031	uncultured_soil_bacterium_g__norank_f__norank_o__SBR1031	0.998661	25	9	0	36	34	0	0	3	0	0	0	15	0	19	0	22	15	12	0	9	35	28	0	21	7	8	0	6	0	21	30	30	13	0	0	15	34	0	0	19	30
ASV7625	Bacteria	Chloroflexi	Anaerolineae	SBR1031	norank_o__SBR1031	norank_f__norank_o__SBR1031	uncultured_soil_bacterium_g__norank_f__norank_o__SBR1031	0.99962	0	0	0	0	0	0	0	0	30	0	0	0	18	0	0	0	20	0	0	0	0	0	7	0	0	0	0	0	0	0	0	0	0	0	0	0	0	0	0	0	0
ASV7691	Bacteria	Chloroflexi	Anaerolineae	SBR1031	norank_o__SBR1031	norank_f__norank_o__SBR1031	uncultured_bacterium_g__norank_f__norank_o__SBR1031	0.776367	0	0	0	0	0	0	0	0	15	0	0	0	0	0	0	14	0	0	0	0	0	0	0	0	0	0	0	0	0	17	14	0	0	0	0	10	0	0	0	0	0
ASV409	Bacteria	Chloroflexi	Anaerolineae	SBR1031	norank_o__SBR1031	norank_f__norank_o__SBR1031	uncultured_soil_bacterium_g__norank_f__norank_o__SBR1031	0.822748	17	0	0	0	8	0	0	0	0	0	0	7	9	0	0	21	19	0	0	0	0	9	3	0	0	0	0	13	0	9	15	0	16	0	0	0	10	15	0	11	7
ASV561	Bacteria	Chloroflexi	Anaerolineae	SBR1031	A4b	norank_f__A4b	uncultured_bacterium_g__norank_f__A4b	0.706916	13	16	6	36	40	6	3	8	13	0	0	0	7	15	7	37	39	5	9	8	26	20	3	10	3	0	0	6	6	0	24	33	8	0	0	5	16	18	0	0	19
ASV341	Bacteria	Chloroflexi	Anaerolineae	SBR1031	A4b	norank_f__A4b	uncultured_soil_bacterium_g__norank_f__A4b	0.90142	19	0	0	0	0	0	0	0	25	0	0	0	9	0	0	0	0	0	0	0	0	0	0	0	0	0	0	0	6	25	0	0	0	0	0	0	0	0	0	0	0
ASV1699	Bacteria	Chloroflexi	Anaerolineae	SBR1031	A4b	norank_f__A4b	uncultured_soil_bacterium_g__norank_f__A4b	0.907539	0	24	0	0	0	0	6	10	0	0	0	0	0	0	0	20	24	0	0	0	33	0	0	11	0	0	0	0	0	0	17	0	10	12	0	14	34	29	0	16	0
ASV4013	Bacteria	Chloroflexi	Anaerolineae	SBR1031	A4b	norank_f__A4b	uncultured_Caldilineales_bacterium_g__norank	0.988981	0	0	7	24	18	0	0	0	0	6	10	9	0	29	9	0	0	0	17	0	0	0	11	8	8	0	0	6	0	0	0	18	0	0	7	11	0	0	0	0	17
ASV2351	Bacteria	Chloroflexi	Anaerolineae	SBR1031	A4b	norank_f__A4b	uncultured_Caldilineales_bacterium_g__norank	0.999861	0	7	17	26	11	0	7	5	13	0	0	22	14	34	15	11	4	11	16	0	12	0	13	16	14	14	0	11	0	0	12	0	9	0	0	0	14	10	6	0	19
ASV866	Bacteria	Chloroflexi	Anaerolineae	SBR1031	A4b	norank_f__A4b	uncultured_bacterium_g__norank_f__A4b	0.757201	8	0	0	0	0	7	3	0	11	0	0	0	0	0	0	12	0	5	0	12	24	0	0	0	0	0	0	0	11	0	16	0	0	0	0	0	7	0	10	7	0
ASV2082	Bacteria	Chloroflexi	Anaerolineae	SBR1031	A4b	norank_f__A4b	NA	0.822324	0	11	0	0	0	0	0	7	20	0	0	0	0	0	0	16	16	11	0	13	0	0	0	0	0	0	0	9	15	14	14	0	11	20	0	0	20	0	11	0	0
ASV761	Bacteria	Chloroflexi	Anaerolineae	SBR1031	A4b	norank_f__A4b	NA	0.762187	10	0	0	0	0	0	0	0	0	0	0	0	12	0	0	6	0	0	0	0	0	0	0	28	0	0	0	0	0	0	16	0	0	0	0	11	0	10	0	17	0
ASV1381	Bacteria	Chloroflexi	Anaerolineae	SBR1031	A4b	norank_f__A4b	NA	0.994349	3	6	0	0	0	0	0	5	14	0	0	0	11	0	0	9	11	8	0	6	21	0	0	6	0	0	0	0	0	18	9	0	4	5	0	0	34	4	2	4	0
ASV481	Bacteria	Chloroflexi	Anaerolineae	SBR1031	A4b	norank_f__A4b	NA	0.996829	15	11	0	0	0	0	16	16	19	0	0	0	13	0	0	29	19	18	0	19	33	0	0	14	0	0	0	12	17	16	24	0	0	0	4	6	24	18	0	17	0
ASV7628	Bacteria	Chloroflexi	Anaerolineae	SBR1031	A4b	norank_f__A4b	uncultured_soil_bacterium_g__norank_f__A4b	0.984079	0	0	0	0	0	0	0	0	29	0	0	0	0	0	0	0	0	0	20	9	0	0	0	19	0	0	0	0	11	0	26	0	0	24	0	14	0	0	9	8	0
ASV1795	Bacteria	Chloroflexi	Anaerolineae	SBR1031	A4b	norank_f__A4b	uncultured_soil_bacterium_g__norank_f__A4b	0.964106	0	19	31	43	31	4	0	0	0	9	18	51	0	24	24	27	0	9	0	0	29	43	21	0	19	11	0	12	0	0	0	20	9	0	5	0	22	11	0	0	31
ASV1846	Bacteria	Chloroflexi	Anaerolineae	SBR1031	A4b	norank_f__A4b	uncultured_bacterium_g__norank_f__A4b	0.888801	0	17	0	0	0	0	13	17	18	0	0	0	16	0	0	14	12	10	0	13	15	0	0	21	0	0	0	9	27	21	19	0	9	20	3	8	57	0	12	18	0
ASV726	Bacteria	Chloroflexi	Anaerolineae	SBR1031	A4b	norank_f__A4b	uncultured_bacterium_g__norank_f__A4b	0.83454	10	26	0	0	0	9	12	7	7	0	0	0	8	0	0	33	16	9	0	0	25	0	0	11	0	0	0	0	12	19	11	0	0	0	0	0	34	20	5	20	0
ASV596	Bacteria	Chloroflexi	Anaerolineae	SBR1031	A4b	norank_f__A4b	uncultured_bacterium_g__norank_f__A4b	0.744556	12	0	0	0	0	0	12	0	7	0	0	0	0	0	0	15	13	0	0	0	0	0	0	0	0	0	0	0	0	0	7	0	0	0	0	0	4	0	0	8	0
ASV3333	Bacteria	Chloroflexi	Anaerolineae	SBR1031	A4b	norank_f__A4b	uncultured_bacterium_g__norank_f__A4b	0.83908	0	0	20	24	10	0	0	0	0	0	3	0	0	0	0	0	0	0	16	0	0	0	3	0	17	0	0	0	0	0	0	4	0	0	0	0	0	0	8	0	0
ASV7660	Bacteria	Chloroflexi	Anaerolineae	SBR1031	A4b	norank_f__A4b	uncultured_bacterium_g__norank_f__A4b	0.850247	0	0	0	0	0	0	0	0	19	0	0	0	0	0	0	0	0	0	0	0	0	0	0	0	0	0	0	0	16	0	0	0	0	0	0	0	0	0	0	21	0
ASV317	Bacteria	Chloroflexi	Anaerolineae	SBR1031	A4b	norank_f__A4b	uncultured_bacterium_g__norank_f__A4b	0.851572	20	7	0	0	0	0	15	8	16	0	0	0	9	0	0	22	14	8	0	11	26	0	0	16	0	0	0	0	0	0	20	0	0	0	3	0	19	0	0	0	0
ASV1789	Bacteria	Chloroflexi	Anaerolineae	SBR1031	A4b	norank_f__A4b	NA	0.999436	0	19	0	5	0	7	15	0	28	0	0	0	12	0	2	29	26	16	0	18	24	0	0	24	0	0	0	12	12	18	0	0	8	16	6	16	25	0	11	20	2
ASV1916	Bacteria	Chloroflexi	Anaerolineae	SBR1031	A4b	norank_f__A4b	NA	0.999689	0	15	0	0	0	11	18	0	19	0	0	0	0	0	0	15	8	0	0	7	16	0	0	0	0	0	0	0	0	14	0	0	6	8	0	6	14	7	0	5	0
ASV1131	Bacteria	Chloroflexi	Anaerolineae	SBR1031	A4b	norank_f__A4b	uncultured_organism_g__norank_f__A4b	0.799561	5	13	0	0	0	0	10	5	19	0	0	0	5	0	0	5	7	6	0	3	4	0	0	0	0	0	0	0	6	10	3	0	0	0	0	0	23	7	0	3	0
ASV2850	Bacteria	Chloroflexi	Anaerolineae	SBR1031	A4b	OLB13	uncultured_bacterium_g__OLB13	0.973902	0	3	11	15	28	0	0	0	0	14	11	18	7	15	23	6	0	0	11	0	0	17	4	14	4	0	4	0	0	0	0	26	0	0	0	0	0	4	0	6	13
ASV339	Bacteria	Chloroflexi	Anaerolineae	SBR1031	A4b	OLB13	uncultured_Chloroflexi_bacterium_g__OLB13	0.812453	19	19	12	25	31	10	5	19	39	11	8	79	15	13	25	0	0	22	14	22	63	12	14	87	10	13	6	67	14	29	36	22	13	31	15	22	73	42	16	0	23
ASV1903	Bacteria	Chloroflexi	Anaerolineae	SBR1031	A4b	OLB13	uncultured_Chloroflexi_bacterium_g__OLB13	0.707682	0	16	0	0	0	0	0	0	18	0	0	0	0	0	0	20	26	0	0	0	18	0	0	0	0	0	0	0	0	0	0	0	0	31	0	0	0	0	0	7	0
ASV318	Bacteria	Chloroflexi	Anaerolineae	SBR1031	A4b	norank_f__A4b	metagenome_g__norank_f__A4b	0.971263	20	0	0	17	0	0	0	14	0	0	0	0	0	0	12	0	0	0	17	0	33	21	19	34	7	14	0	42	0	0	0	0	0	0	33	0	0	0	0	0	0
ASV1694	Bacteria	Chloroflexi	Anaerolineae	SBR1031	A4b	norank_f__A4b	metagenome_g__norank_f__A4b	0.921746	0	25	0	0	0	0	4	0	25	0	0	0	12	0	0	33	27	9	0	15	18	0	0	0	0	0	0	0	0	31	32	0	20	23	0	26	30	29	0	25	0
ASV5661	Bacteria	Chloroflexi	Anaerolineae	SBR1031	A4b	norank_f__A4b	metagenome_g__norank_f__A4b	0.901252	0	0	0	0	16	10	0	0	0	0	0	11	0	0	0	0	0	0	0	0	9	0	0	0	0	0	11	0	0	13	0	22	0	0	0	0	30	0	0	0	10
ASV270	Bacteria	Chloroflexi	Anaerolineae	SBR1031	A4b	norank_f__A4b	NA	0.999844	22	29	0	0	0	0	18	10	17	0	0	0	19	0	0	16	66	4	0	24	22	0	0	8	0	0	0	0	8	59	12	0	26	0	0	26	56	19	0	19	0
ASV33	Bacteria	Chloroflexi	Anaerolineae	SBR1031	A4b	norank_f__A4b	NA	0.999907	57	32	0	13	0	12	35	35	48	0	0	0	45	0	0	61	91	42	0	27	92	0	8	46	11	0	0	31	26	92	49	0	51	36	20	65	98	54	17	27	0
ASV4859	Bacteria	Chloroflexi	Anaerolineae	SBR1031	A4b	norank_f__A4b	NA	0.999904	0	0	0	13	37	0	0	0	35	0	0	42	0	32	0	0	0	0	0	0	24	31	0	28	0	6	0	0	0	0	0	42	0	0	0	23	20	0	0	17	52
ASV1738	Bacteria	Chloroflexi	Anaerolineae	SBR1031	A4b	norank_f__A4b	NA	0.999791	0	22	0	0	0	0	0	0	11	0	0	0	11	0	0	14	20	12	0	0	21	0	0	0	0	0	0	0	0	20	10	0	0	12	0	0	10	20	0	8	0
ASV1985	Bacteria	Chloroflexi	Anaerolineae	SBR1031	A4b	norank_f__A4b	NA	0.998713	0	13	0	0	0	0	0	0	18	0	0	0	9	0	0	0	0	8	0	0	17	0	0	14	0	0	0	12	6	0	11	0	5	0	0	12	23	0	0	0	0
ASV708	Bacteria	Chloroflexi	Anaerolineae	RBG-13-54-9	norank_o__RBG-13-54-9	norank_f__norank_o__RBG-13-54-9	uncultured_sludge_bacterium_A31	0.834021	10	18	0	0	0	13	25	12	8	0	0	0	11	0	0	26	15	25	0	20	12	0	0	17	0	0	0	8	28	14	18	0	20	7	0	10	25	19	20	12	0
ASV816	Bacteria	Chloroflexi	Anaerolineae	Anaerolineales	Anaerolineaceae	norank_f__Anaerolineaceae	NA	0.892453	9	0	0	0	0	0	0	9	15	0	0	0	19	0	0	0	0	0	0	0	0	0	0	9	0	0	0	0	0	5	11	0	6	0	0	8	18	0	0	0	0
ASV1638	Bacteria	Chloroflexi	Anaerolineae	Anaerolineales	Anaerolineaceae	norank_f__Anaerolineaceae	NA	0.928155	0	31	0	15	5	0	10	13	0	3	3	9	0	0	0	0	0	17	0	0	28	10	9	25	0	0	0	0	0	0	0	0	9	0	0	16	17	19	0	0	6
ASV243	Bacteria	Chloroflexi	Anaerolineae	Anaerolineales	Anaerolineaceae	norank_f__Anaerolineaceae	NA	0.950831	23	0	0	0	0	11	0	0	24	0	0	0	0	0	0	17	15	0	0	10	0	0	0	0	0	0	0	11	20	10	32	0	0	8	0	0	0	13	16	25	0
ASV74	Bacteria	Chloroflexi	Anaerolineae	Anaerolineales	Anaerolineaceae	norank_f__Anaerolineaceae	uncultured_sludge_bacterium_S41	0.722142	38	62	17	10	8	8	18	19	41	0	4	7	24	3	6	45	39	29	21	27	42	18	8	35	16	7	3	19	28	41	54	18	26	9	0	40	52	54	25	32	6
ASV833	Bacteria	Chloroflexi	Anaerolineae	Anaerolineales	Anaerolineaceae	norank_f__Anaerolineaceae	NA	0.839248	9	27	0	0	0	0	0	0	12	0	0	0	0	0	0	0	0	0	0	0	23	0	0	0	0	0	0	0	0	0	17	0	0	0	0	0	0	0	0	17	0
ASV6741	Bacteria	Chloroflexi	Anaerolineae	Anaerolineales	Anaerolineaceae	norank_f__Anaerolineaceae	NA	0.926714	0	0	0	0	0	0	14	0	0	0	0	0	0	0	0	18	17	0	0	8	0	0	0	10	0	0	0	0	0	13	0	3	0	0	0	0	17	23	0	0	0
ASV3107	Bacteria	Chloroflexi	Anaerolineae	Anaerolineales	Anaerolineaceae	norank_f__Anaerolineaceae	NA	0.98245	0	0	34	50	61	0	0	10	0	15	27	33	0	32	41	0	0	15	34	0	16	53	26	0	35	41	17	22	0	0	18	34	12	0	11	22	17	17	15	0	35
ASV737	Bacteria	Chloroflexi	Anaerolineae	Anaerolineales	Anaerolineaceae	norank_f__Anaerolineaceae	NA	0.979658	10	12	40	45	91	10	6	0	14	35	26	77	0	38	29	0	6	14	30	12	17	97	18	21	30	26	12	9	15	9	0	39	5	0	0	13	0	0	7	7	53
ASV762	Bacteria	Chloroflexi	Anaerolineae	Anaerolineales	Anaerolineaceae	norank_f__Anaerolineaceae	NA	0.991094	10	23	0	0	0	0	10	0	11	0	0	0	0	0	0	0	0	16	0	12	19	0	0	9	0	0	0	0	0	11	13	0	0	0	0	0	17	19	7	0	0
ASV1866	Bacteria	Chloroflexi	Anaerolineae	Ardenticatenales	norank_o__Ardenticatenales	norank_f__norank_o__Ardenticatenales	uncultured_bacterium_g__norank_f__norank_o__Ardenticatenales	0.90175	0	16	0	0	0	5	17	7	10	0	0	0	12	0	0	7	0	14	0	11	9	0	0	10	0	0	0	0	20	13	5	0	3	7	0	5	18	10	0	9	0
ASV788	Bacteria	Chloroflexi	Anaerolineae	Ardenticatenales	norank_o__Ardenticatenales	norank_f__norank_o__Ardenticatenales	NA	0.956032	9	16	0	0	0	15	35	17	15	0	0	0	11	0	0	0	10	0	0	21	33	0	0	9	0	0	0	8	32	18	14	0	10	0	7	7	40	14	13	0	0
ASV1811	Bacteria	Chloroflexi	Anaerolineae	Ardenticatenales	norank_o__Ardenticatenales	norank_f__norank_o__Ardenticatenales	uncultured_Litorilinea_sp.	0.941824	0	18	0	0	0	9	12	0	18	0	0	0	8	0	0	23	20	15	0	19	24	0	0	0	0	0	0	0	13	18	0	0	0	0	0	0	16	9	17	13	0
ASV3305	Bacteria	Chloroflexi	Anaerolineae	Ardenticatenales	norank_o__Ardenticatenales	norank_f__norank_o__Ardenticatenales	uncultured_Litorilinea_sp.	0.881323	0	0	21	21	45	0	0	0	0	4	6	58	0	38	8	0	0	0	19	0	0	39	13	10	23	20	0	11	0	0	0	21	0	0	14	0	0	0	0	0	45
ASV2069	Bacteria	Chloroflexi	Anaerolineae	Ardenticatenales	norank_o__Ardenticatenales	norank_f__norank_o__Ardenticatenales	uncultured_Litorilinea_sp.	0.999767	0	12	0	0	0	0	13	0	0	0	0	0	15	0	0	9	15	0	0	0	22	0	0	0	0	0	0	0	0	0	0	0	0	13	0	0	21	13	0	0	0
ASV1768	Bacteria	Chloroflexi	Anaerolineae	Caldilineales	Caldilineaceae	norank_f__Caldilineaceae	uncultured_bacterium_g__norank_f__Caldilineaceae	0.830774	0	20	0	0	0	0	13	0	12	0	0	0	0	0	0	14	26	6	0	5	19	0	0	12	0	0	0	4	8	20	8	0	0	11	4	0	16	21	5	6	0
ASV6373	Bacteria	Chloroflexi	Anaerolineae	Caldilineales	Caldilineaceae	norank_f__Caldilineaceae	NA	0.999999	0	0	0	0	0	23	36	22	11	0	0	0	0	0	0	0	0	21	0	0	22	0	0	0	0	0	0	0	0	0	16	0	11	0	0	0	27	0	0	0	0
ASV1947	Bacteria	Chloroflexi	Anaerolineae	Caldilineales	Caldilineaceae	norank_f__Caldilineaceae	NA	0.999998	0	14	11	9	7	0	0	0	0	12	0	0	0	0	4	0	0	0	0	0	0	10	0	0	0	0	0	0	0	16	0	0	0	0	0	0	0	16	0	10	13
ASV495	Bacteria	Chloroflexi	Anaerolineae	Caldilineales	Caldilineaceae	norank_f__Caldilineaceae	NA	0.999998	15	18	0	0	0	0	0	0	0	0	0	0	13	0	0	0	22	0	0	0	0	0	0	18	0	0	0	17	28	0	14	0	0	0	0	0	0	24	0	0	0
ASV2090	Bacteria	Chloroflexi	Anaerolineae	Caldilineales	Caldilineaceae	norank_f__Caldilineaceae	NA	0.999993	0	11	0	0	0	0	14	6	11	0	0	0	7	0	0	6	0	15	0	20	13	0	0	8	0	0	0	7	13	18	0	0	6	0	0	10	25	14	8	9	0
ASV2066	Bacteria	Chloroflexi	Anaerolineae	Caldilineales	Caldilineaceae	norank_f__Caldilineaceae	uncultured_soil_bacterium_g__norank_f__Caldilineaceae	0.704447	0	12	0	0	0	0	13	0	0	0	0	0	0	0	0	10	23	0	0	10	10	0	0	0	0	0	0	0	20	7	0	0	12	0	0	0	12	0	13	0	0
ASV754	Bacteria	Chloroflexi	Anaerolineae	Caldilineales	Caldilineaceae	norank_f__Caldilineaceae	NA	0.999999	10	0	0	0	0	0	0	0	25	0	0	0	0	0	0	25	16	0	0	0	19	0	0	10	0	0	0	14	0	9	16	0	0	0	14	14	15	0	0	0	0
ASV1018	Bacteria	Chloroflexi	Anaerolineae	Caldilineales	Caldilineaceae	norank_f__Caldilineaceae	NA	0.999998	7	41	0	33	0	20	46	40	20	0	18	0	24	30	0	20	27	32	0	28	36	0	0	21	0	0	15	21	37	40	16	0	0	0	17	15	48	54	37	35	0
ASV3091	Bacteria	Chloroflexi	Anaerolineae	Caldilineales	Caldilineaceae	norank_f__Caldilineaceae	NA	0.999997	0	0	36	0	18	0	0	0	0	13	0	37	0	0	0	0	0	0	28	0	0	26	26	0	20	22	0	0	0	0	0	0	0	24	0	0	0	0	0	0	40
ASV672	Bacteria	Chloroflexi	Anaerolineae	Caldilineales	Caldilineaceae	norank_f__Caldilineaceae	NA	0.999994	11	14	0	0	0	0	0	0	0	0	0	0	19	0	0	18	11	18	0	0	10	0	0	0	0	0	0	13	0	0	0	0	0	0	0	0	0	0	0	0	0
ASV2230	Bacteria	Chloroflexi	Anaerolineae	Caldilineales	Caldilineaceae	norank_f__Caldilineaceae	NA	0.999984	0	9	0	0	0	11	26	0	0	0	0	0	0	0	0	0	9	0	0	11	11	0	0	15	0	0	0	0	24	0	14	0	17	12	0	0	27	24	0	0	0
ASV2362	Bacteria	Chloroflexi	Anaerolineae	Caldilineales	Caldilineaceae	norank_f__Caldilineaceae	uncultured_soil_bacterium_g__norank_f__Caldilineaceae	0.974742	0	7	0	0	0	0	12	0	16	0	0	0	0	0	0	0	0	14	0	0	0	0	0	0	0	0	0	12	17	10	9	0	0	22	0	0	14	15	15	0	0
ASV315	Bacteria	Chloroflexi	Anaerolineae	Caldilineales	Caldilineaceae	norank_f__Caldilineaceae	uncultured_soil_bacterium_g__norank_f__Caldilineaceae	0.989336	20	11	0	0	0	0	10	16	0	0	0	0	0	0	0	21	21	0	0	14	17	0	0	10	0	0	0	0	0	0	12	0	8	0	0	14	11	15	0	0	6
ASV7616	Bacteria	Chloroflexi	Anaerolineae	Caldilineales	Caldilineaceae	norank_f__Caldilineaceae	uncultured_bacterium_g__norank_f__Caldilineaceae	0.713723	0	0	0	0	0	0	0	0	37	0	0	0	0	0	0	25	15	0	0	0	24	0	0	0	0	0	0	0	0	21	10	0	0	32	0	0	15	0	0	0	0
ASV12159	Bacteria	Chloroflexi	Anaerolineae	Caldilineales	Caldilineaceae	norank_f__Caldilineaceae	NA	0.999998	0	0	0	0	0	0	0	0	0	0	0	0	0	0	0	0	0	0	0	0	18	0	0	18	0	0	0	18	0	0	18	0	0	0	17	0	18	0	0	0	0
ASV715	Bacteria	Chloroflexi	Anaerolineae	Caldilineales	Caldilineaceae	norank_f__Caldilineaceae	uncultured_bacterium_g__norank_f__Caldilineaceae	0.960056	10	13	0	0	0	6	15	9	0	0	0	0	10	0	0	13	17	7	0	9	12	0	0	0	0	0	0	7	18	14	10	0	6	15	0	0	9	17	11	9	0
ASV800	Bacteria	Chloroflexi	Anaerolineae	Caldilineales	Caldilineaceae	norank_f__Caldilineaceae	metagenome_g__norank_f__Caldilineaceae	0.794424	9	7	10	3	0	0	4	8	9	8	0	0	16	10	3	13	14	7	15	4	7	0	16	18	5	3	2	16	0	11	16	0	9	0	6	9	11	0	0	14	9
ASV1067	Bacteria	Chloroflexi	Anaerolineae	Caldilineales	Caldilineaceae	Litorilinea	uncultured_bacterium_g__Litorilinea	0.999682	6	0	2	0	0	0	10	7	0	0	0	0	0	0	0	12	6	13	0	14	16	0	0	8	0	0	0	4	19	6	0	0	7	0	5	0	16	9	9	8	0
ASV3820	Bacteria	Chloroflexi	Anaerolineae	Caldilineales	Caldilineaceae	norank_f__Caldilineaceae	uncultured_Chloroflexia_bacterium_g__norank	0.770266	0	0	9	19	40	0	0	0	0	0	7	29	0	29	5	0	0	0	11	0	0	13	6	0	10	10	5	0	0	0	0	21	0	0	0	0	0	0	0	0	39
ASV3816	Bacteria	Armatimonadota	norank_p__Armatimonadota	norank_c__norank_p__Armatimonadota	norank_o__norank_c__norank_p__Armatimonadota	norank_f__norank_o__norank_c__norank_p__Armatimonadota	uncultured_bacterium_g__norank_f__norank_o__norank_c__norank_p__Armatimonadota	0.730246	0	0	9	21	25	0	0	2	0	11	0	22	0	18	0	0	0	0	17	0	2	19	5	0	8	10	0	0	0	0	0	13	0	0	0	0	5	0	0	0	31
ASV3190	Bacteria	Armatimonadota	norank_p__Armatimonadota	norank_c__norank_p__Armatimonadota	norank_o__norank_c__norank_p__Armatimonadota	norank_f__norank_o__norank_c__norank_p__Armatimonadota	uncultured_bacterium_g__norank_f__norank_o__norank_c__norank_p__Armatimonadota	0.928121	0	0	27	24	32	0	0	0	0	27	14	36	0	31	0	0	0	0	44	0	0	31	20	0	16	16	10	0	0	0	0	18	0	0	0	0	0	0	0	0	37
ASV1024	Bacteria	Armatimonadota	norank_p__Armatimonadota	norank_c__norank_p__Armatimonadota	norank_o__norank_c__norank_p__Armatimonadota	norank_f__norank_o__norank_c__norank_p__Armatimonadota	NA	0.998159	6	0	0	0	10	0	0	0	5	7	5	0	0	23	7	0	10	0	0	0	8	21	0	11	0	0	0	0	0	8	8	20	8	0	0	0	14	12	8	7	23
ASV1239	Bacteria	Chloroflexi	Ktedonobacteria	C0119	norank_o__C0119	norank_f__norank_o__C0119	NA	0.999672	4	0	4	12	19	0	0	0	0	5	7	10	0	14	7	0	0	0	10	0	0	15	0	0	9	4	0	0	2	2	5	16	0	0	0	0	0	3	0	0	11
ASV3086	Bacteria	Chloroflexi	Ktedonobacteria	C0119	norank_o__C0119	norank_f__norank_o__C0119	uncultured_bacterium_g__norank_f__norank_o__C0119	0.944995	0	0	36	26	54	0	0	0	0	21	10	68	0	23	19	0	0	0	17	0	0	55	11	0	32	40	17	0	0	0	0	24	0	0	0	0	0	0	0	0	33
ASV2075	Bacteria	Chloroflexi	Ktedonobacteria	C0119	norank_o__C0119	norank_f__norank_o__C0119	NA	0.999888	0	11	31	42	60	0	11	8	8	28	19	57	0	40	21	6	5	15	44	17	9	59	19	9	48	21	14	0	9	10	8	22	0	3	0	4	17	10	0	7	32
ASV290	Bacteria	Chloroflexi	Chloroflexia	Thermomicrobiales	AKYG1722	norank_f__AKYG1722	NA	1	21	17	9	0	0	14	36	23	28	0	0	0	12	19	8	32	40	24	8	11	35	7	0	20	12	6	0	40	0	35	29	10	14	31	8	14	34	45	14	27	14
ASV86	Bacteria	Chloroflexi	Chloroflexia	Thermomicrobiales	AKYG1722	norank_f__AKYG1722	uncultured_Alphaproteobacteria_bacterium_g__norank_f__AKYG1722	0.736821	36	38	63	72	97	30	53	51	36	31	28	141	30	124	44	39	48	38	63	32	44	77	54	46	73	45	45	55	50	44	64	49	29	51	27	32	62	64	33	39	103
ASV3149	Bacteria	Chloroflexi	Chloroflexia	Thermomicrobiales	AKYG1722	norank_f__AKYG1722	uncultured_Alphaproteobacteria_bacterium_g__norank_f__AKYG1722	0.892893	0	0	31	47	53	0	0	0	16	26	18	59	0	58	0	22	0	19	28	0	18	45	21	23	20	0	26	27	0	18	20	30	0	0	23	21	0	0	0	0	53
ASV905	Bacteria	Chloroflexi	Chloroflexia	Thermomicrobiales	AKYG1722	norank_f__AKYG1722	NA	0.999999	8	13	0	0	0	12	10	10	0	0	0	0	5	0	0	26	15	16	0	5	20	0	0	0	0	0	0	0	18	12	9	0	9	8	0	0	32	15	7	9	0
ASV1304	Bacteria	Chloroflexi	Chloroflexia	Thermomicrobiales	AKYG1722	norank_f__AKYG1722	uncultured_bacterium_g__norank_f__AKYG1722	0.82818	4	20	0	0	0	13	13	13	0	0	5	15	8	26	0	9	7	17	0	6	17	0	0	7	5	0	6	11	20	7	9	3	6	0	0	2	14	13	8	5	26
ASV1385	Bacteria	Chloroflexi	Chloroflexia	Chloroflexales	Roseiflexaceae	norank_f__Roseiflexaceae	uncultured_bacterium_g__norank_f__Roseiflexaceae	0.984428	3	29	0	0	0	9	16	10	0	0	0	0	0	0	0	6	3	36	0	30	19	0	0	0	0	0	0	6	23	10	5	0	12	0	0	3	20	25	13	0	2
ASV836	Bacteria	Chloroflexi	Chloroflexia	Chloroflexales	Roseiflexaceae	norank_f__Roseiflexaceae	uncultured_Chloroflexi_bacterium_g__norank_f__Roseiflexaceae	0.78034	9	0	14	11	9	0	18	0	0	15	0	0	0	26	6	24	0	9	9	0	0	13	0	0	15	11	31	0	0	11	0	22	0	14	0	6	0	0	12	11	17
ASV505	Bacteria	Chloroflexi	Chloroflexia	Chloroflexales	Roseiflexaceae	norank_f__Roseiflexaceae	uncultured_Chloroflexi_bacterium_g__norank_f__Roseiflexaceae	0.869183	14	10	0	0	0	0	10	0	8	0	0	0	7	0	0	27	14	0	0	0	12	0	0	10	0	0	0	15	12	13	25	0	0	0	0	0	11	7	0	0	0
ASV3241	Bacteria	Chloroflexi	Chloroflexia	Chloroflexales	Roseiflexaceae	norank_f__Roseiflexaceae	uncultured_Chloroflexaceae_bacterium_g__norank_f__Roseiflexaceae	0.83219	0	0	24	0	23	0	0	0	0	0	0	0	0	24	11	0	0	0	0	0	0	0	21	0	20	0	0	0	0	0	0	28	0	0	0	0	0	0	0	0	30
ASV4724	Bacteria	Chloroflexi	Chloroflexia	Chloroflexales	Roseiflexaceae	norank_f__Roseiflexaceae	uncultured_Chloroflexaceae_bacterium_g__norank_f__Roseiflexaceae	0.713232	0	0	0	19	0	0	0	0	0	11	12	39	0	0	0	0	0	0	21	0	0	0	0	0	0	9	0	0	0	0	0	0	0	0	0	0	0	0	0	0	0
ASV3097	Bacteria	Chloroflexi	Chloroflexia	Chloroflexales	Roseiflexaceae	norank_f__Roseiflexaceae	NA	0.999996	0	0	35	64	56	0	0	0	0	13	14	37	0	67	12	0	0	0	39	0	0	38	26	0	30	22	17	0	0	0	0	34	0	0	0	0	0	0	0	0	51
ASV1793	Bacteria	Chloroflexi	Chloroflexia	Chloroflexales	Roseiflexaceae	norank_f__Roseiflexaceae	NA	0.999995	0	19	0	0	0	0	0	0	11	0	0	0	0	0	0	0	0	0	0	0	15	0	0	0	0	12	0	0	0	11	0	0	0	0	0	0	15	0	0	0	0
ASV8125	Bacteria	Chloroflexi	Chloroflexia	Chloroflexales	Roseiflexaceae	norank_f__Roseiflexaceae	NA	0.999994	0	0	0	0	0	0	0	0	0	14	0	30	0	0	15	0	0	0	21	0	0	21	16	0	0	0	23	0	0	0	0	23	0	0	0	0	0	0	0	0	0
ASV3377	Bacteria	Chloroflexi	Chloroflexia	Chloroflexales	Roseiflexaceae	norank_f__Roseiflexaceae	uncultured_bacterium_g__norank_f__Roseiflexaceae	0.832575	0	0	19	32	29	0	0	0	0	0	10	14	0	26	0	0	0	0	0	0	0	13	12	0	14	5	0	0	0	0	0	0	0	0	0	0	0	0	0	0	16
ASV883	Bacteria	Chloroflexi	Chloroflexia	Chloroflexales	Roseiflexaceae	norank_f__Roseiflexaceae	NA	0.999993	8	0	0	0	23	0	0	0	12	0	0	0	0	0	0	8	0	0	0	12	0	0	0	0	0	0	0	0	11	11	7	0	0	0	0	0	13	0	0	0	0
ASV2046	Bacteria	Chloroflexi	Chloroflexia	Chloroflexales	Roseiflexaceae	norank_f__Roseiflexaceae	NA	0.999984	0	12	56	56	57	0	0	0	0	31	38	70	0	58	20	0	0	0	47	0	7	35	49	0	47	39	31	0	0	7	0	38	0	10	0	0	7	0	0	0	48
ASV3254	Bacteria	Chloroflexi	Chloroflexia	Chloroflexales	Roseiflexaceae	norank_f__Roseiflexaceae	uncultured_bacterium_g__norank_f__Roseiflexaceae	0.834526	0	0	23	22	31	0	0	0	0	8	15	38	0	19	8	0	0	0	24	0	0	23	28	0	39	25	12	0	0	0	0	25	0	0	0	0	0	0	0	0	21
ASV602	Bacteria	Chloroflexi	Chloroflexia	Chloroflexales	Roseiflexaceae	norank_f__Roseiflexaceae	uncultured_bacterium_g__norank_f__Roseiflexaceae	0.892214	12	28	0	0	0	0	23	9	24	0	0	0	15	0	0	25	16	8	0	13	26	0	0	21	0	0	0	20	10	26	12	0	15	19	0	10	32	19	11	9	0
ASV3804	Bacteria	Chloroflexi	Chloroflexia	Chloroflexales	Roseiflexaceae	norank_f__Roseiflexaceae	NA	0.99999	0	0	10	0	23	0	0	0	0	0	0	0	0	11	0	0	0	0	15	0	0	0	0	0	37	9	0	0	0	0	0	19	0	0	0	0	0	0	0	0	0
ASV3247	Bacteria	Chloroflexi	Chloroflexia	Chloroflexales	Roseiflexaceae	norank_f__Roseiflexaceae	uncultured_bacterium_g__norank_f__Roseiflexaceae	0.860245	0	0	24	16	31	0	0	0	0	16	0	28	0	25	20	0	0	0	16	0	0	20	9	0	0	8	19	0	0	0	0	0	0	0	0	0	0	0	0	0	28
ASV4754	Bacteria	Chloroflexi	Chloroflexia	Chloroflexales	Roseiflexaceae	norank_f__Roseiflexaceae	NA	0.999987	0	0	0	17	20	0	0	0	0	0	0	29	0	21	0	0	0	0	0	0	0	24	10	0	0	0	0	0	0	0	0	16	0	0	0	0	0	0	0	0	18
ASV3369	Bacteria	Chloroflexi	Chloroflexia	Chloroflexales	Roseiflexaceae	norank_f__Roseiflexaceae	uncultured_bacterium_g__norank_f__Roseiflexaceae	0.923172	0	0	19	30	0	0	0	0	0	0	0	0	0	0	0	0	0	0	14	0	0	16	14	0	0	0	0	0	0	0	0	12	0	0	0	0	0	0	0	0	12
ASV5732	Bacteria	Chloroflexi	Chloroflexia	Chloroflexales	Roseiflexaceae	norank_f__Roseiflexaceae	uncultured_bacterium_g__norank_f__Roseiflexaceae	0.942807	0	0	0	0	12	0	0	0	0	0	12	14	0	31	0	0	0	0	0	0	0	0	0	0	0	8	10	0	0	0	0	0	0	0	0	0	0	0	0	0	0
ASV2095	Bacteria	Chloroflexi	Chloroflexia	Chloroflexales	Roseiflexaceae	norank_f__Roseiflexaceae	uncultured_bacterium_g__norank_f__Roseiflexaceae	0.729835	0	11	11	22	13	9	12	9	9	12	10	31	11	27	9	9	6	0	6	7	18	10	0	21	5	7	12	15	7	9	13	9	6	0	15	9	22	7	10	0	33
ASV3465	Bacteria	Chloroflexi	Chloroflexia	Chloroflexales	Roseiflexaceae	norank_f__Roseiflexaceae	uncultured_bacterium_g__norank_f__Roseiflexaceae	0.990128	0	0	16	15	17	0	0	0	0	7	4	20	0	17	0	0	0	0	13	0	0	15	15	0	14	10	7	0	0	0	0	13	0	0	0	0	0	0	0	0	20
ASV3605	Bacteria	Chloroflexi	Chloroflexia	Chloroflexales	Roseiflexaceae	norank_f__Roseiflexaceae	uncultured_bacterium_g__norank_f__Roseiflexaceae	0.992934	0	0	13	19	17	0	0	0	0	0	5	24	0	22	0	0	0	6	10	0	4	14	15	0	11	10	0	0	0	0	0	18	0	0	0	0	0	0	0	0	0
ASV460	Bacteria	Chloroflexi	Chloroflexia	Chloroflexales	Roseiflexaceae	norank_f__Roseiflexaceae	uncultured_soil_bacterium_g__norank_f__Roseiflexaceae	0.810637	15	13	16	41	26	4	12	3	12	11	13	39	0	37	12	30	25	12	9	0	21	23	20	7	12	8	0	8	10	14	12	15	12	0	8	11	22	5	7	20	42
ASV704	Bacteria	Chloroflexi	Chloroflexia	Chloroflexales	Roseiflexaceae	norank_f__Roseiflexaceae	uncultured_Chloroflexi_bacterium_g__norank_f__Roseiflexaceae	0.957693	10	10	21	26	27	7	10	4	14	4	7	33	6	11	9	16	22	7	13	14	10	19	15	18	12	21	9	8	10	17	15	26	6	12	3	6	12	8	8	14	28
ASV3367	Bacteria	Chloroflexi	Chloroflexia	Chloroflexales	Roseiflexaceae	norank_f__Roseiflexaceae	uncultured_bacterium_g__norank_f__Roseiflexaceae	0.99771	0	0	19	12	24	0	0	0	0	8	0	15	0	31	11	0	0	0	0	0	0	20	18	0	0	11	0	0	0	0	0	0	0	0	0	0	0	0	0	0	33
ASV2543	Bacteria	Chloroflexi	Chloroflexia	Chloroflexales	Chloroflexaceae	FFCH7168	uncultured_bacterium_g__FFCH7168	0.999949	0	5	12	18	29	6	7	8	9	10	7	37	5	19	0	11	6	5	20	5	9	19	17	7	16	12	6	12	5	11	11	21	4	10	9	5	16	3	7	6	24
ASV8103	Bacteria	Chloroflexi	Chloroflexia	Kallotenuales	AKIW781	norank_f__AKIW781	uncultured_bacterium_g__norank_f__AKIW781	0.997431	0	0	0	0	0	0	0	0	0	21	11	0	0	0	3	0	0	0	13	0	0	25	0	0	0	0	0	0	0	0	0	0	0	0	0	0	0	0	0	0	20
ASV3706	Bacteria	Chloroflexi	Chloroflexia	Kallotenuales	AKIW781	norank_f__AKIW781	uncultured_bacterium_g__norank_f__AKIW781	0.998612	0	0	11	22	42	0	0	0	0	0	0	32	0	14	0	0	0	0	0	0	0	0	0	0	13	11	0	0	0	0	0	10	0	0	0	0	0	0	0	0	0
ASV2846	Bacteria	Chloroflexi	Chloroflexia	Kallotenuales	AKIW781	norank_f__AKIW781	uncultured_bacterium_g__norank_f__AKIW781	0.91136	0	3	0	39	19	0	0	0	0	0	10	29	0	29	0	0	0	0	11	0	6	0	8	8	0	0	0	5	0	2	0	20	0	0	0	0	0	0	0	0	15
ASV1532	Bacteria	Chloroflexi	Chloroflexia	Kallotenuales	AKIW781	norank_f__AKIW781	uncultured_bacterium_g__norank_f__AKIW781	0.95101	2	0	23	0	22	0	0	0	0	4	0	25	0	0	6	3	4	0	0	0	0	12	0	0	23	4	7	0	0	0	0	0	0	0	0	0	7	2	3	0	16
ASV1150	Bacteria	Chloroflexi	Chloroflexia	Thermomicrobiales	JG30-KF-CM45	norank_f__JG30-KF-CM45	NA	0.99954	5	14	0	4	0	0	16	7	6	0	0	0	13	0	0	19	13	10	0	6	12	0	0	15	0	0	0	12	7	6	12	0	5	15	6	6	23	12	9	0	0
ASV6742	Bacteria	Chloroflexi	Chloroflexia	Thermomicrobiales	JG30-KF-CM45	norank_f__JG30-KF-CM45	NA	0.999987	0	0	0	0	0	0	14	20	0	0	0	0	0	0	0	0	9	0	0	0	0	0	0	0	0	0	0	0	16	23	0	0	0	0	0	0	0	16	0	12	0
ASV3001	Bacteria	Chloroflexi	Chloroflexia	Thermomicrobiales	JG30-KF-CM45	norank_f__JG30-KF-CM45	uncultured_Chloroflexi_bacterium_g__norank_f__JG30-KF-CM45	0.743811	0	0	103	135	176	0	0	0	0	53	72	226	13	182	52	0	0	0	112	19	28	124	97	0	72	60	53	0	20	0	0	91	0	0	18	0	0	0	34	0	171
ASV1688	Bacteria	Chloroflexi	Chloroflexia	Thermomicrobiales	JG30-KF-CM45	norank_f__JG30-KF-CM45	uncultured_Chloroflexi_bacterium_g__norank_f__JG30-KF-CM45	0.730151	0	25	89	84	83	0	0	0	0	28	29	70	0	133	42	0	0	0	111	0	0	74	77	26	54	23	36	21	0	0	21	56	0	0	0	16	17	22	0	0	108
ASV4688	Bacteria	Chloroflexi	Chloroflexia	Thermomicrobiales	JG30-KF-CM45	norank_f__JG30-KF-CM45	uncultured_Chloroflexi_bacterium_g__norank_f__JG30-KF-CM45	0.759717	0	0	0	23	25	0	0	0	0	0	0	32	0	36	0	0	0	0	0	0	0	21	0	0	12	0	16	0	0	0	0	0	0	0	0	0	0	0	0	0	27
ASV3002	Bacteria	Chloroflexi	Chloroflexia	Thermomicrobiales	JG30-KF-CM45	norank_f__JG30-KF-CM45	uncultured_Chloroflexi_bacterium_g__norank_f__JG30-KF-CM45	0.744587	0	0	102	67	122	0	33	0	34	57	27	118	28	145	71	36	36	0	112	17	26	74	50	49	48	78	81	39	34	0	44	63	28	0	45	30	24	16	0	35	119
ASV3542	Bacteria	Chloroflexi	Chloroflexia	Thermomicrobiales	JG30-KF-CM45	norank_f__JG30-KF-CM45	uncultured_Chloroflexi_bacterium_g__norank_f__JG30-KF-CM45	0.71057	0	0	15	11	19	0	0	0	0	0	0	21	0	20	0	0	0	0	17	0	0	0	15	0	10	11	0	0	0	0	0	0	0	0	0	0	0	0	0	0	22
ASV3024	Bacteria	Chloroflexi	Chloroflexia	Thermomicrobiales	JG30-KF-CM45	norank_f__JG30-KF-CM45	uncultured_Chloroflexi_bacterium_g__norank_f__JG30-KF-CM45	0.746123	0	0	53	64	95	0	0	0	0	21	21	86	0	61	14	0	0	0	65	0	0	56	50	0	37	28	16	0	0	0	0	34	0	0	0	0	0	0	0	0	79
ASV3309	Bacteria	Chloroflexi	Chloroflexia	Thermomicrobiales	JG30-KF-CM45	norank_f__JG30-KF-CM45	NA	0.99969	0	0	21	0	18	0	0	0	0	0	0	0	0	25	0	0	0	0	26	0	0	0	17	5	13	7	0	0	0	0	0	0	0	0	0	0	0	0	0	0	16
ASV4866	Bacteria	Chloroflexi	Chloroflexia	Thermomicrobiales	JG30-KF-CM45	norank_f__JG30-KF-CM45	NA	0.999843	0	0	0	12	17	0	0	0	0	0	0	21	0	22	0	0	0	0	12	0	0	18	13	0	6	9	0	0	0	0	0	10	0	0	0	0	0	0	0	0	16
ASV3252	Bacteria	Chloroflexi	Chloroflexia	Thermomicrobiales	JG30-KF-CM45	norank_f__JG30-KF-CM45	NA	0.999878	0	0	23	16	14	0	0	0	0	6	7	19	5	38	0	0	0	0	38	0	0	13	16	15	10	6	8	19	0	0	8	9	0	0	13	0	0	10	0	0	31
ASV1153	Bacteria	Chloroflexi	Chloroflexia	Thermomicrobiales	JG30-KF-CM45	norank_f__JG30-KF-CM45	uncultured_Chloroflexi_bacterium_g__norank_f__JG30-KF-CM45	0.734293	5	13	0	0	0	0	15	0	18	0	0	0	9	0	0	13	9	12	0	7	21	0	0	13	0	0	0	11	15	10	13	0	13	0	11	10	15	16	11	14	0
ASV2463	Bacteria	Chloroflexi	Chloroflexia	Thermomicrobiales	JG30-KF-CM45	norank_f__JG30-KF-CM45	uncultured_Chloroflexi_bacterium_g__norank_f__JG30-KF-CM45	0.807846	0	6	0	0	0	5	25	0	0	0	0	0	8	0	0	12	5	5	0	8	27	0	0	16	0	0	0	9	0	19	13	0	0	19	0	0	23	21	0	5	0
ASV3287	Bacteria	Chloroflexi	Chloroflexia	Thermomicrobiales	JG30-KF-CM45	norank_f__JG30-KF-CM45	uncultured_bacterium_g__norank_f__JG30-KF-CM45	0.756797	0	0	22	0	34	0	0	0	0	0	0	23	0	36	0	0	0	0	24	0	0	22	21	0	0	10	0	0	0	0	0	29	0	0	0	0	0	0	0	0	54
ASV3598	Bacteria	Chloroflexi	Chloroflexia	Thermomicrobiales	JG30-KF-CM45	norank_f__JG30-KF-CM45	uncultured_bacterium_g__norank_f__JG30-KF-CM45	0.837628	0	0	13	37	50	0	0	0	0	13	29	60	0	22	7	0	0	0	13	0	0	32	14	0	15	5	15	0	0	0	0	17	0	0	0	0	0	0	0	0	34
ASV3265	Bacteria	Chloroflexi	Chloroflexia	Thermomicrobiales	JG30-KF-CM45	norank_f__JG30-KF-CM45	uncultured_bacterium_g__norank_f__JG30-KF-CM45	0.761225	0	0	23	37	26	0	0	0	0	22	8	41	0	35	11	0	0	0	35	0	0	37	0	0	29	22	0	0	0	0	0	21	0	0	0	0	0	0	0	0	21
ASV2169	Bacteria	Chloroflexi	Chloroflexia	Thermomicrobiales	JG30-KF-CM45	norank_f__JG30-KF-CM45	uncultured_bacterium_g__norank_f__JG30-KF-CM45	0.706854	0	10	15	9	33	0	20	8	11	6	6	42	19	31	8	25	17	5	18	13	17	29	12	10	6	13	9	9	8	17	17	8	6	24	10	6	31	26	9	12	17
ASV1680	Bacteria	Chloroflexi	Chloroflexia	Thermomicrobiales	JG30-KF-CM45	norank_f__JG30-KF-CM45	uncultured_bacterium_g__norank_f__JG30-KF-CM45	0.866995	0	25	0	0	12	14	19	0	0	0	0	20	19	18	0	29	16	17	0	14	27	10	0	15	0	0	0	19	18	19	14	0	11	0	12	0	38	29	0	13	15
ASV181	Bacteria	Chloroflexi	Chloroflexia	Thermomicrobiales	JG30-KF-CM45	norank_f__JG30-KF-CM45	uncultured_bacterium_g__norank_f__JG30-KF-CM45	0.793263	26	22	0	0	0	15	23	39	17	0	0	0	14	0	0	33	25	28	0	22	34	0	0	32	0	0	0	18	50	22	22	0	19	15	16	15	43	38	15	17	0
ASV813	Bacteria	Chloroflexi	Chloroflexia	Thermomicrobiales	JG30-KF-CM45	norank_f__JG30-KF-CM45	uncultured_bacterium_g__norank_f__JG30-KF-CM45	0.836981	9	10	46	61	106	11	15	19	0	33	14	77	0	72	22	0	0	14	75	21	9	67	45	22	45	20	23	0	19	12	0	29	0	0	0	0	20	12	13	0	75
ASV1792	Bacteria	Chloroflexi	Chloroflexia	Thermomicrobiales	JG30-KF-CM45	norank_f__JG30-KF-CM45	uncultured_bacterium_g__norank_f__JG30-KF-CM45	0.910736	0	19	0	0	0	0	0	0	0	0	0	0	0	0	0	23	21	0	0	0	15	0	0	0	0	0	0	0	0	19	10	0	0	10	0	0	0	18	0	0	0
ASV782	Bacteria	Chloroflexi	Chloroflexia	Thermomicrobiales	JG30-KF-CM45	norank_f__JG30-KF-CM45	uncultured_bacterium_g__norank_f__JG30-KF-CM45	0.828934	9	19	35	19	36	16	30	22	16	21	8	21	21	54	13	20	14	15	57	18	35	9	15	27	15	10	11	38	22	29	13	8	13	29	25	15	26	25	12	11	28
ASV3009	Bacteria	Chloroflexi	Chloroflexia	Thermomicrobiales	JG30-KF-CM45	norank_f__JG30-KF-CM45	uncultured_anaerobic_ammonium-oxidizing_bacterium_g__norank_f__JG30-KF-CM45	0.757535	0	0	66	46	80	18	0	23	0	40	22	46	0	95	29	14	0	16	83	19	22	63	46	13	50	32	42	18	19	22	9	23	0	0	28	0	17	0	0	0	73
ASV9450	Bacteria	Chloroflexi	Chloroflexia	Thermomicrobiales	JG30-KF-CM45	norank_f__JG30-KF-CM45	NA	0.999992	0	0	0	0	0	0	0	0	0	0	0	0	0	36	18	0	0	0	0	0	0	0	9	0	0	0	0	0	0	0	0	0	0	17	0	0	0	0	0	0	0
ASV284	Bacteria	Chloroflexi	Chloroflexia	Thermomicrobiales	JG30-KF-CM45	norank_f__JG30-KF-CM45	NA	0.999994	21	32	0	0	0	44	54	47	33	0	0	0	23	0	0	54	31	38	0	50	62	0	0	24	0	0	0	26	43	64	30	0	28	19	31	40	45	64	26	27	0
ASV3251	Bacteria	Chloroflexi	Chloroflexia	Thermomicrobiales	JG30-KF-CM45	norank_f__JG30-KF-CM45	NA	0.999992	0	0	24	0	35	0	0	0	0	0	0	13	0	0	0	0	0	0	25	0	0	13	9	0	0	0	0	0	0	0	0	0	0	0	0	0	0	0	0	0	41
ASV648	Bacteria	Chloroflexi	Chloroflexia	Thermomicrobiales	JG30-KF-CM45	norank_f__JG30-KF-CM45	uncultured_anaerobic_ammonium-oxidizing_bacterium_g__norank_f__JG30-KF-CM45	0.839476	12	13	0	0	0	23	22	23	25	0	0	0	10	0	0	52	17	17	0	17	34	0	0	13	0	0	0	14	22	39	44	0	19	31	13	10	25	34	0	19	0
ASV1949	Bacteria	Chloroflexi	Chloroflexia	Thermomicrobiales	JG30-KF-CM45	norank_f__JG30-KF-CM45	uncultured_bacterium_g__norank_f__JG30-KF-CM45	0.985873	0	14	0	0	14	0	12	20	0	9	0	13	0	0	0	22	16	19	0	25	19	12	0	0	0	0	0	20	24	20	22	0	19	0	15	10	27	23	0	14	0
ASV3398	Bacteria	Chloroflexi	Chloroflexia	Thermomicrobiales	JG30-KF-CM45	norank_f__JG30-KF-CM45	uncultured_bacterium_g__norank_f__JG30-KF-CM45	0.919858	0	0	18	0	0	0	0	0	0	10	12	22	5	18	13	0	0	0	0	0	0	16	7	0	0	15	16	4	0	0	0	9	0	0	0	0	0	0	0	0	0
ASV404	Bacteria	Chloroflexi	Chloroflexia	Thermomicrobiales	JG30-KF-CM45	norank_f__JG30-KF-CM45	NA	0.999999	17	17	0	14	0	19	17	21	23	0	0	8	15	0	0	31	21	18	0	13	43	0	0	20	0	0	0	43	0	45	26	0	23	19	25	36	29	37	8	25	0
ASV2015	Bacteria	Chloroflexi	Chloroflexia	Thermomicrobiales	JG30-KF-CM45	norank_f__JG30-KF-CM45	NA	0.999995	0	13	14	16	18	0	0	14	0	6	10	30	0	10	7	16	13	6	8	11	0	11	9	12	7	11	0	20	11	0	0	11	12	16	0	17	16	20	0	0	8
ASV471	Bacteria	Chloroflexi	Chloroflexia	Thermomicrobiales	JG30-KF-CM45	norank_f__JG30-KF-CM45	uncultured_bacterium_g__norank_f__JG30-KF-CM45	0.745471	15	0	0	0	0	0	11	0	17	0	0	0	20	0	0	0	0	0	0	0	23	0	0	0	0	0	0	0	0	12	23	0	0	0	0	0	0	0	0	15	0
ASV10776	Bacteria	Chloroflexi	Chloroflexia	Thermomicrobiales	JG30-KF-CM45	norank_f__JG30-KF-CM45	uncultured_bacterium_g__norank_f__JG30-KF-CM45	0.952027	0	0	0	0	0	0	0	0	0	0	0	0	0	0	0	0	22	0	0	0	0	0	0	0	0	0	0	0	0	0	0	0	0	0	0	0	0	0	0	0	0
ASV1775	Bacteria	Chloroflexi	Chloroflexia	Thermomicrobiales	JG30-KF-CM45	norank_f__JG30-KF-CM45	uncultured_bacterium_g__norank_f__JG30-KF-CM45	0.945665	0	20	40	15	24	0	14	22	0	17	0	21	24	25	26	26	0	0	22	0	51	20	25	26	16	24	28	22	18	25	22	0	21	0	74	24	12	31	26	0	32
ASV497	Bacteria	Chloroflexi	Chloroflexia	Thermomicrobiales	JG30-KF-CM45	norank_f__JG30-KF-CM45	uncultured_bacterium_g__norank_f__JG30-KF-CM45	0.972273	15	15	0	0	0	0	14	19	15	0	0	0	0	0	0	11	13	0	0	0	23	0	0	21	0	0	0	17	7	33	0	0	0	26	51	10	5	17	0	9	0
ASV4805	Bacteria	Chloroflexi	Chloroflexia	Thermomicrobiales	JG30-KF-CM45	norank_f__JG30-KF-CM45	uncultured_bacterium_g__norank_f__JG30-KF-CM45	0.906207	0	0	0	14	27	0	0	0	0	7	11	13	0	14	0	0	0	0	12	0	0	19	0	0	6	0	0	0	0	0	0	10	0	0	0	0	0	0	0	0	32
ASV366	Bacteria	Chloroflexi	Chloroflexia	Thermomicrobiales	JG30-KF-CM45	norank_f__JG30-KF-CM45	uncultured_bacterium_g__norank_f__JG30-KF-CM45	0.939472	18	13	0	0	0	10	6	9	11	0	5	0	10	4	0	17	23	14	0	11	15	8	0	14	0	0	0	11	18	7	13	0	13	0	9	5	9	12	0	13	0
ASV1236	Bacteria	Chloroflexi	Chloroflexia	Thermomicrobiales	JG30-KF-CM45	norank_f__JG30-KF-CM45	uncultured_bacterium_g__norank_f__JG30-KF-CM45	0.985112	5	6	10	13	9	0	4	6	0	6	0	16	0	15	0	0	6	0	10	0	0	5	8	7	10	0	0	7	0	0	0	0	0	29	6	0	10	8	0	0	21
ASV3366	Bacteria	Chloroflexi	Chloroflexia	Thermomicrobiales	JG30-KF-CM45	norank_f__JG30-KF-CM45	uncultured_Chloroflexi_bacterium_g__norank_f__JG30-KF-CM45	0.842455	0	0	19	14	37	14	0	0	0	6	10	28	0	22	11	0	0	0	19	0	0	14	13	0	10	17	18	0	0	0	0	10	0	0	0	0	0	0	0	0	23
ASV411	Bacteria	Chloroflexi	Chloroflexia	Thermomicrobiales	JG30-KF-CM45	norank_f__JG30-KF-CM45	uncultured_Chloroflexi_bacterium_g__norank_f__JG30-KF-CM45	0.743524	17	0	0	0	0	0	0	15	17	0	0	0	16	0	0	27	19	14	0	21	19	0	0	22	0	0	0	22	0	23	25	0	0	17	0	20	20	0	11	0	0
ASV1810	Bacteria	Chloroflexi	Chloroflexia	Thermomicrobiales	JG30-KF-CM45	norank_f__JG30-KF-CM45	uncultured_Chloroflexi_bacterium_g__norank_f__JG30-KF-CM45	0.731745	0	18	0	0	0	0	19	0	0	0	0	0	0	0	0	0	0	0	0	0	17	0	0	0	0	0	0	0	0	6	0	0	0	0	0	0	0	19	0	9	0
ASV3071	Bacteria	Chloroflexi	Chloroflexia	Thermomicrobiales	JG30-KF-CM45	norank_f__JG30-KF-CM45	uncultured_soil_bacterium_g__norank_f__JG30-KF-CM45	0.926162	0	0	38	16	17	0	0	0	0	11	13	10	0	27	13	0	0	0	38	0	0	0	29	0	0	14	8	0	0	0	0	13	0	0	0	0	0	0	0	0	15
ASV456	Bacteria	Chloroflexi	Chloroflexia	Thermomicrobiales	JG30-KF-CM45	norank_f__JG30-KF-CM45	NA	0.999995	16	29	18	0	23	28	25	41	15	0	0	23	13	0	0	0	0	37	0	0	27	0	0	20	0	23	0	24	0	19	34	0	28	20	15	21	28	0	0	12	29
ASV10787	Bacteria	Chloroflexi	Chloroflexia	Thermomicrobiales	JG30-KF-CM45	norank_f__JG30-KF-CM45	NA	0.999993	0	0	0	0	0	0	0	0	0	0	0	0	0	0	0	0	19	0	0	0	0	0	0	0	0	0	0	0	29	0	0	0	0	0	0	0	0	33	22	0	0
ASV3773	Bacteria	Chloroflexi	Chloroflexia	Thermomicrobiales	JG30-KF-CM45	norank_f__JG30-KF-CM45	NA	0.999987	0	0	10	34	21	0	0	9	0	27	23	36	0	49	0	21	0	0	31	15	0	43	35	0	32	15	28	0	0	9	0	19	0	0	0	0	0	0	0	0	36
ASV3172	Bacteria	Chloroflexi	TK10	norank_c__TK10	norank_o__norank_c__TK10	norank_f__norank_o__norank_c__TK10	uncultured_bacterium_g__norank_f__norank_o__norank_c__TK10	0.914014	0	0	29	24	21	2	8	5	8	15	0	28	0	29	0	9	0	0	30	0	13	24	15	12	0	15	5	0	9	6	5	17	3	5	0	12	17	15	0	0	33
ASV3259	Bacteria	Chloroflexi	TK10	norank_c__TK10	norank_o__norank_c__TK10	norank_f__norank_o__norank_c__TK10	uncultured_bacterium_g__norank_f__norank_o__norank_c__TK10	0.972473	0	0	23	23	28	0	0	0	0	13	11	18	0	17	6	0	0	0	11	0	10	0	12	0	13	0	6	0	0	7	0	0	0	0	0	0	0	10	0	0	23
ASV4728	Bacteria	Chloroflexi	TK10	norank_c__TK10	norank_o__norank_c__TK10	norank_f__norank_o__norank_c__TK10	NA	0.999999	0	0	0	19	0	0	0	0	0	0	0	0	0	16	8	0	0	0	14	0	0	16	0	0	0	13	13	0	0	0	0	0	0	0	0	0	0	0	0	0	0
ASV3288	Bacteria	Chloroflexi	TK10	norank_c__TK10	norank_o__norank_c__TK10	norank_f__norank_o__norank_c__TK10	NA	0.999999	0	0	22	0	23	0	0	0	0	11	0	19	0	12	0	0	0	0	0	0	0	12	6	0	20	0	0	0	0	0	0	11	0	0	0	0	0	0	0	0	21
ASV2140	Bacteria	Chloroflexi	TK10	norank_c__TK10	norank_o__norank_c__TK10	norank_f__norank_o__norank_c__TK10	NA	0.999986	0	10	41	38	53	5	13	5	15	31	26	41	9	32	21	9	11	9	25	7	10	33	36	15	21	27	22	7	8	11	6	21	6	0	5	2	15	10	11	0	40
ASV3145	Bacteria	Chloroflexi	TK10	norank_c__TK10	norank_o__norank_c__TK10	norank_f__norank_o__norank_c__TK10	uncultured_bacterium_g__norank_f__norank_o__norank_c__TK10	0.926843	0	0	31	20	25	0	0	0	0	10	5	26	0	17	11	0	0	0	18	0	0	16	9	0	7	19	13	0	4	0	0	14	0	0	0	0	0	0	0	0	23
ASV1764	Bacteria	Chloroflexi	TK10	norank_c__TK10	norank_o__norank_c__TK10	norank_f__norank_o__norank_c__TK10	NA	1	0	20	26	44	27	0	17	0	0	0	0	30	0	40	16	9	0	25	35	21	26	21	30	25	39	21	16	32	19	16	0	17	16	0	0	0	0	17	0	0	21
ASV3101	Bacteria	Chloroflexi	TK10	norank_c__TK10	norank_o__norank_c__TK10	norank_f__norank_o__norank_c__TK10	uncultured_Chloroflexus_sp._g__norank_f__norank_o__norank	0.711159	0	0	35	20	21	0	0	0	0	0	0	13	0	38	0	0	0	0	44	0	0	18	0	0	11	0	21	0	0	0	0	32	0	0	0	0	0	0	0	0	13
ASV2035	Bacteria	Chloroflexi	TK10	norank_c__TK10	norank_o__norank_c__TK10	norank_f__norank_o__norank_c__TK10	NA	0.999994	0	12	0	20	16	0	0	0	0	0	4	37	0	0	0	0	0	0	12	0	0	0	0	13	10	11	0	0	11	0	0	0	0	0	0	0	0	10	0	0	0
ASV3281	Bacteria	Chloroflexi	TK10	norank_c__TK10	norank_o__norank_c__TK10	norank_f__norank_o__norank_c__TK10	NA	0.999989	0	0	22	0	0	0	10	0	12	9	0	0	0	18	9	11	14	0	0	0	10	8	15	0	0	0	0	0	0	17	11	0	4	13	4	0	15	0	0	8	13
ASV3422	Bacteria	Chloroflexi	TK10	norank_c__TK10	norank_o__norank_c__TK10	norank_f__norank_o__norank_c__TK10	uncultured_Chloroflexus_sp._g__norank_f__norank_o__norank	0.752739	0	0	18	0	16	0	0	0	0	0	0	23	0	22	0	0	0	0	33	0	0	0	0	0	0	0	0	0	0	0	0	39	0	0	0	0	0	0	0	0	0
ASV3164	Bacteria	Chloroflexi	TK10	norank_c__TK10	norank_o__norank_c__TK10	norank_f__norank_o__norank_c__TK10	NA	1	0	0	30	31	19	0	0	0	0	0	0	0	0	37	0	0	0	0	0	0	0	36	0	0	0	0	0	0	0	0	0	0	0	0	0	0	0	0	0	0	38
ASV11436	Bacteria	Chloroflexi	TK10	norank_c__TK10	norank_o__norank_c__TK10	norank_f__norank_o__norank_c__TK10	NA	1	0	0	0	0	0	0	0	0	0	0	0	0	0	0	0	0	0	0	37	0	0	0	0	0	0	28	0	0	0	0	0	0	0	0	0	0	0	0	0	0	0
ASV90	Bacteria	Chloroflexi	TK10	norank_c__TK10	norank_o__norank_c__TK10	norank_f__norank_o__norank_c__TK10	NA	1	36	0	0	21	0	0	0	0	26	0	0	0	0	0	0	24	0	0	0	0	0	0	0	0	0	0	0	0	0	0	0	0	0	0	0	0	0	0	0	0	0
ASV2506	Bacteria	Chloroflexi	TK10	norank_c__TK10	norank_o__norank_c__TK10	norank_f__norank_o__norank_c__TK10	NA	1	0	6	7	13	20	0	0	0	0	10	7	19	0	15	0	6	0	0	10	8	0	9	15	4	7	7	14	0	10	9	6	14	0	0	0	0	0	0	0	7	17
ASV1619	Bacteria	Chloroflexi	TK10	norank_c__TK10	norank_o__norank_c__TK10	norank_f__norank_o__norank_c__TK10	uncultured_Chloroflexus_sp._g__norank_f__norank_o__norank	0.923312	0	35	81	87	80	0	33	0	0	58	51	141	0	85	37	30	30	25	48	42	36	86	89	34	57	75	45	32	24	0	0	51	26	0	24	0	43	28	35	0	117
ASV3587	Bacteria	Chloroflexi	TK10	norank_c__TK10	norank_o__norank_c__TK10	norank_f__norank_o__norank_c__TK10	NA	1	0	0	14	0	13	0	0	0	0	0	0	14	0	17	0	22	39	0	0	0	0	14	0	0	0	0	0	0	0	19	36	0	0	0	0	34	32	0	0	0	0
ASV3421	Bacteria	Chloroflexi	TK10	norank_c__TK10	norank_o__norank_c__TK10	norank_f__norank_o__norank_c__TK10	NA	0.995107	0	0	18	0	16	0	0	0	0	0	16	16	0	0	0	0	10	0	0	0	0	0	0	0	0	0	0	0	0	0	0	32	0	0	0	0	0	0	0	11	0
ASV3171	Bacteria	Chloroflexi	TK10	norank_c__TK10	norank_o__norank_c__TK10	norank_f__norank_o__norank_c__TK10	NA	0.997355	0	0	29	35	37	0	0	0	0	19	0	27	0	31	20	7	0	0	29	0	0	26	25	0	35	27	17	0	0	0	0	0	0	0	0	0	0	0	0	0	43
ASV3728	Bacteria	Chloroflexi	JG30-KF-CM66	norank_c__JG30-KF-CM66	norank_o__norank_c__JG30-KF-CM66	norank_f__norank_o__norank_c__JG30-KF-CM66	uncultured_bacterium_g__norank_f__norank_o__norank_c__JG30-KF-CM66	0.795868	0	0	11	0	10	0	0	0	0	8	7	20	0	11	0	0	0	0	11	0	0	0	0	0	0	19	0	0	0	0	0	0	0	0	0	0	0	0	0	0	7
ASV3074	Bacteria	Chloroflexi	JG30-KF-CM66	norank_c__JG30-KF-CM66	norank_o__norank_c__JG30-KF-CM66	norank_f__norank_o__norank_c__JG30-KF-CM66	uncultured_bacterium_g__norank_f__norank_o__norank_c__JG30-KF-CM66	0.837503	0	0	38	0	30	0	0	0	0	0	0	0	0	17	13	0	0	0	28	0	0	28	32	0	19	0	16	0	0	0	0	14	0	0	0	0	0	0	0	0	31
ASV3828	Bacteria	Chloroflexi	JG30-KF-CM66	norank_c__JG30-KF-CM66	norank_o__norank_c__JG30-KF-CM66	norank_f__norank_o__norank_c__JG30-KF-CM66	NA	0.989213	0	0	9	14	24	0	0	0	0	15	12	21	0	19	8	0	0	0	9	0	0	28	17	0	0	7	20	0	0	0	0	16	0	0	0	0	0	0	0	0	18
ASV736	Bacteria	Chloroflexi	JG30-KF-CM66	norank_c__JG30-KF-CM66	norank_o__norank_c__JG30-KF-CM66	norank_f__norank_o__norank_c__JG30-KF-CM66	NA	0.998903	10	32	0	0	0	18	24	0	20	0	0	0	5	0	0	24	11	8	0	17	0	0	0	0	0	0	0	0	11	16	0	0	7	23	0	0	21	31	0	11	0
ASV1798	Bacteria	Chloroflexi	JG30-KF-CM66	norank_c__JG30-KF-CM66	norank_o__norank_c__JG30-KF-CM66	norank_f__norank_o__norank_c__JG30-KF-CM66	uncultured_bacterium_g__norank_f__norank_o__norank_c__JG30-KF-CM66	0.741535	0	19	0	0	0	0	16	12	0	0	0	0	12	0	0	21	8	12	0	15	9	0	0	11	0	0	0	12	13	11	23	0	16	0	0	11	23	18	19	13	0
ASV901	Bacteria	Chloroflexi	JG30-KF-CM66	norank_c__JG30-KF-CM66	norank_o__norank_c__JG30-KF-CM66	norank_f__norank_o__norank_c__JG30-KF-CM66	NA	0.998174	8	17	0	0	0	0	16	7	12	0	0	0	11	0	0	12	15	9	0	10	10	0	0	0	0	0	0	0	15	13	0	0	16	0	0	0	15	5	0	0	0
ASV512	Bacteria	Chloroflexi	JG30-KF-CM66	norank_c__JG30-KF-CM66	norank_o__norank_c__JG30-KF-CM66	norank_f__norank_o__norank_c__JG30-KF-CM66	uncultured_Armatimonadetes_bacterium_g__norank_f__norank_o__norank	0.878226	14	39	0	0	0	0	74	12	54	0	0	0	35	0	0	67	40	23	0	20	28	0	0	17	0	0	0	5	14	58	30	0	16	11	4	10	69	34	0	26	0
ASV3073	Bacteria	Chloroflexi	Gitt-GS-136	norank_c__Gitt-GS-136	norank_o__norank_c__Gitt-GS-136	norank_f__norank_o__norank_c__Gitt-GS-136	NA	1	0	0	38	45	35	0	0	0	0	25	21	53	0	21	21	0	0	0	50	0	0	98	40	0	45	45	0	0	0	0	0	31	0	0	0	0	0	0	0	0	20
ASV4759	Bacteria	Chloroflexi	Gitt-GS-136	norank_c__Gitt-GS-136	norank_o__norank_c__Gitt-GS-136	norank_f__norank_o__norank_c__Gitt-GS-136	NA	1	0	0	0	17	46	0	0	0	0	42	25	46	0	0	23	0	0	0	0	0	0	73	0	0	16	14	29	0	0	0	0	27	0	0	0	0	0	0	0	0	25
ASV148	Bacteria	Chloroflexi	Gitt-GS-136	norank_c__Gitt-GS-136	norank_o__norank_c__Gitt-GS-136	norank_f__norank_o__norank_c__Gitt-GS-136	NA	1	29	0	0	0	25	0	0	0	0	21	0	0	0	0	0	0	0	0	0	0	0	31	0	0	0	0	0	0	0	0	0	33	0	0	0	0	0	0	0	0	0
ASV27	Bacteria	Chloroflexi	Gitt-GS-136	norank_c__Gitt-GS-136	norank_o__norank_c__Gitt-GS-136	norank_f__norank_o__norank_c__Gitt-GS-136	NA	1	68	55	0	0	0	14	0	56	48	0	0	50	62	0	0	79	67	66	0	60	72	60	0	53	0	0	0	48	30	37	94	0	34	0	18	106	61	80	33	40	0
ASV3234	Bacteria	Chloroflexi	Gitt-GS-136	norank_c__Gitt-GS-136	norank_o__norank_c__Gitt-GS-136	norank_f__norank_o__norank_c__Gitt-GS-136	NA	1	0	0	25	38	30	0	0	0	0	35	22	0	0	32	26	0	0	0	40	0	0	0	0	0	0	0	0	0	0	0	0	27	0	0	0	0	0	0	0	0	25
ASV188	Bacteria	Chloroflexi	Gitt-GS-136	norank_c__Gitt-GS-136	norank_o__norank_c__Gitt-GS-136	norank_f__norank_o__norank_c__Gitt-GS-136	NA	1	26	0	0	0	0	0	16	0	0	0	0	0	0	0	0	0	0	0	0	0	0	0	0	0	0	0	0	0	0	0	18	0	0	30	0	0	0	0	0	0	0
ASV345	Bacteria	Chloroflexi	Gitt-GS-136	norank_c__Gitt-GS-136	norank_o__norank_c__Gitt-GS-136	norank_f__norank_o__norank_c__Gitt-GS-136	uncultured_bacterium_g__norank_f__norank_o__norank_c__Gitt-GS-136	0.978384	19	0	0	6	9	9	0	18	19	0	0	0	17	0	0	15	6	0	7	11	13	16	0	13	0	0	0	21	9	0	21	7	8	0	0	22	21	12	0	15	0
ASV1170	Bacteria	Chloroflexi	Gitt-GS-136	norank_c__Gitt-GS-136	norank_o__norank_c__Gitt-GS-136	norank_f__norank_o__norank_c__Gitt-GS-136	uncultured_bacterium_g__norank_f__norank_o__norank_c__Gitt-GS-136	0.891881	5	9	0	0	0	0	7	0	12	0	0	0	22	0	0	9	4	5	0	5	12	0	0	25	0	0	0	18	0	9	16	0	3	0	0	22	38	10	0	7	0
ASV501	Bacteria	Chloroflexi	Gitt-GS-136	norank_c__Gitt-GS-136	norank_o__norank_c__Gitt-GS-136	norank_f__norank_o__norank_c__Gitt-GS-136	uncultured_bacterium_g__norank_f__norank_o__norank_c__Gitt-GS-136	0.887479	14	0	0	0	0	0	7	5	8	0	0	0	13	0	0	12	12	3	0	11	0	0	0	6	0	0	0	0	0	0	16	0	0	0	0	8	7	6	0	13	0
ASV8401	Bacteria	Chloroflexi	Gitt-GS-136	norank_c__Gitt-GS-136	norank_o__norank_c__Gitt-GS-136	norank_f__norank_o__norank_c__Gitt-GS-136	NA	1	0	0	0	0	0	0	0	0	0	0	27	0	0	0	35	0	0	0	0	0	0	27	0	0	0	0	0	0	0	0	26	0	0	0	0	0	0	0	0	0	0
ASV60	Bacteria	Chloroflexi	Gitt-GS-136	norank_c__Gitt-GS-136	norank_o__norank_c__Gitt-GS-136	norank_f__norank_o__norank_c__Gitt-GS-136	NA	0.999996	42	35	0	0	0	11	7	13	17	0	0	9	13	0	0	28	22	29	0	34	28	0	0	18	0	4	0	10	16	26	27	0	16	0	0	13	44	47	6	9	0
ASV396	Bacteria	Chloroflexi	KD4-96	norank_c__KD4-96	norank_o__norank_c__KD4-96	norank_f__norank_o__norank_c__KD4-96	NA	0.999995	17	14	0	0	0	0	14	0	15	0	0	0	8	0	0	17	12	17	0	11	14	0	0	0	0	0	0	0	0	16	0	0	0	0	0	0	24	23	0	10	0
ASV34	Bacteria	Chloroflexi	KD4-96	norank_c__KD4-96	norank_o__norank_c__KD4-96	norank_f__norank_o__norank_c__KD4-96	uncultured_Chloroflexi_bacterium_g__norank_f__norank_o__norank_c__KD4-96	0.724257	57	0	0	0	0	0	0	0	0	0	0	0	0	0	0	0	0	34	0	40	0	0	0	0	0	0	0	0	0	0	47	0	25	0	0	0	0	0	0	37	0
ASV114	Bacteria	Chloroflexi	KD4-96	norank_c__KD4-96	norank_o__norank_c__KD4-96	norank_f__norank_o__norank_c__KD4-96	NA	0.999996	31	27	0	0	0	21	18	21	16	0	0	0	14	0	0	33	19	25	0	32	29	0	0	21	0	0	0	15	16	20	51	0	9	0	0	26	32	31	16	13	0
ASV4713	Bacteria	Chloroflexi	KD4-96	norank_c__KD4-96	norank_o__norank_c__KD4-96	norank_f__norank_o__norank_c__KD4-96	NA	0.999998	0	0	0	20	31	0	0	0	0	26	38	0	0	27	0	0	0	0	19	0	0	56	0	0	0	0	24	0	0	0	0	36	0	0	0	0	0	0	0	0	31
ASV5606	Bacteria	Chloroflexi	KD4-96	norank_c__KD4-96	norank_o__norank_c__KD4-96	norank_f__norank_o__norank_c__KD4-96	NA	0.999995	0	0	0	0	21	0	0	0	0	0	0	29	0	0	26	0	0	0	0	0	0	0	0	0	25	0	0	0	0	0	0	0	0	0	0	0	0	0	0	0	0
ASV3197	Bacteria	Chloroflexi	KD4-96	norank_c__KD4-96	norank_o__norank_c__KD4-96	norank_f__norank_o__norank_c__KD4-96	uncultured_Chloroflexi_bacterium_g__norank_f__norank_o__norank_c__KD4-96	0.789172	0	0	27	34	30	0	0	0	0	0	0	0	0	0	0	0	0	0	34	0	0	37	25	0	0	32	0	0	0	0	0	24	0	0	0	0	0	0	0	0	25
ASV1771	Bacteria	Chloroflexi	KD4-96	norank_c__KD4-96	norank_o__norank_c__KD4-96	norank_f__norank_o__norank_c__KD4-96	uncultured_Chloroflexi_bacterium_g__norank_f__norank_o__norank_c__KD4-96	0.761138	0	20	0	0	0	0	0	0	30	0	0	0	0	0	0	23	0	0	0	0	21	0	0	26	0	0	0	0	30	32	13	0	0	0	0	32	30	0	0	0	0
ASV15021	Bacteria	Chloroflexi	KD4-96	norank_c__KD4-96	norank_o__norank_c__KD4-96	norank_f__norank_o__norank_c__KD4-96	NA	0.999994	0	0	0	0	0	0	0	0	0	0	0	0	0	0	0	0	0	0	0	0	0	0	0	0	0	0	0	0	0	0	0	8	0	0	0	0	0	0	0	0	0
ASV2227	Bacteria	Chloroflexi	KD4-96	norank_c__KD4-96	norank_o__norank_c__KD4-96	norank_f__norank_o__norank_c__KD4-96	NA	0.999954	0	9	0	0	0	0	0	15	0	0	0	0	25	0	0	16	0	0	0	7	12	0	0	0	0	0	0	0	0	15	9	0	0	18	0	0	8	6	0	0	0
ASV902	Bacteria	Chloroflexi	KD4-96	norank_c__KD4-96	norank_o__norank_c__KD4-96	norank_f__norank_o__norank_c__KD4-96	NA	1	8	0	22	54	35	0	7	0	0	32	19	52	0	27	36	15	15	0	40	0	7	108	19	0	27	34	6	0	0	0	8	69	0	0	0	8	26	10	8	0	44
ASV321	Bacteria	Chloroflexi	KD4-96	norank_c__KD4-96	norank_o__norank_c__KD4-96	norank_f__norank_o__norank_c__KD4-96	NA	0.999999	20	21	0	0	0	0	5	18	28	0	0	0	13	0	0	37	27	0	0	18	13	0	0	11	0	0	0	12	21	0	22	0	16	0	0	19	14	0	22	35	0
ASV3625	Bacteria	Chloroflexi	KD4-96	norank_c__KD4-96	norank_o__norank_c__KD4-96	norank_f__norank_o__norank_c__KD4-96	NA	1	0	0	13	12	15	0	0	0	0	13	7	13	0	7	0	0	0	0	16	0	0	19	9	0	10	0	0	0	0	0	0	13	0	0	0	0	0	0	0	0	0
ASV195	Bacteria	Chloroflexi	KD4-96	norank_c__KD4-96	norank_o__norank_c__KD4-96	norank_f__norank_o__norank_c__KD4-96	NA	1	25	14	16	8	22	0	9	20	14	17	6	16	12	11	12	34	23	15	20	8	19	33	10	0	18	8	8	16	7	23	24	19	0	0	7	25	15	20	6	18	20
ASV36	Bacteria	Chloroflexi	KD4-96	norank_c__KD4-96	norank_o__norank_c__KD4-96	norank_f__norank_o__norank_c__KD4-96	NA	0.999998	56	45	0	0	0	0	0	0	69	0	0	0	35	0	0	68	51	0	0	0	67	0	0	0	0	0	0	46	0	66	89	0	0	0	0	62	74	58	0	46	0
ASV16	Bacteria	Chloroflexi	KD4-96	norank_c__KD4-96	norank_o__norank_c__KD4-96	norank_f__norank_o__norank_c__KD4-96	NA	0.999999	91	62	112	179	203	69	78	67	92	127	98	171	69	0	102	118	89	83	157	78	49	206	86	0	90	72	0	0	93	66	0	190	56	57	0	0	92	74	56	55	112
ASV3810	Bacteria	Chloroflexi	KD4-96	norank_c__KD4-96	norank_o__norank_c__KD4-96	norank_f__norank_o__norank_c__KD4-96	uncultured_bacterium_g__norank_f__norank_o__norank_c__KD4-96	0.706663	0	0	10	17	22	0	0	0	26	15	0	0	0	12	0	0	38	34	24	0	35	23	15	25	0	0	0	0	0	0	48	0	0	0	0	0	0	0	23	31	16
ASV123	Bacteria	Chloroflexi	KD4-96	norank_c__KD4-96	norank_o__norank_c__KD4-96	norank_f__norank_o__norank_c__KD4-96	uncultured_bacterium_g__norank_f__norank_o__norank_c__KD4-96	0.742804	31	26	0	0	0	0	0	0	0	0	0	0	0	0	0	28	29	0	0	0	30	0	0	0	0	0	0	0	0	0	37	0	13	0	0	0	30	34	0	25	0
ASV9437	Bacteria	Chloroflexi	KD4-96	norank_c__KD4-96	norank_o__norank_c__KD4-96	norank_f__norank_o__norank_c__KD4-96	NA	0.999998	0	0	0	0	0	0	0	0	0	0	0	0	0	116	0	0	0	0	0	0	0	0	0	139	0	0	57	109	0	0	93	0	0	0	56	103	0	0	0	0	0
ASV144	Bacteria	Chloroflexi	KD4-96	norank_c__KD4-96	norank_o__norank_c__KD4-96	norank_f__norank_o__norank_c__KD4-96	uncultured_bacterium_g__norank_f__norank_o__norank_c__KD4-96	0.785293	29	25	0	0	0	0	18	33	20	0	0	0	0	0	0	32	0	26	0	20	30	0	0	0	0	0	0	32	26	37	33	0	18	0	0	29	25	34	0	0	0
ASV536	Bacteria	Chloroflexi	KD4-96	norank_c__KD4-96	norank_o__norank_c__KD4-96	norank_f__norank_o__norank_c__KD4-96	NA	0.999998	14	17	0	0	0	0	0	14	0	0	0	0	0	0	0	11	12	19	0	18	20	0	0	0	0	0	0	0	0	22	17	0	8	0	0	26	15	23	0	0	0
ASV222	Bacteria	Chloroflexi	KD4-96	norank_c__KD4-96	norank_o__norank_c__KD4-96	norank_f__norank_o__norank_c__KD4-96	uncultured_bacterium_g__norank_f__norank_o__norank_c__KD4-96	0.745407	24	13	0	10	0	0	0	0	17	0	0	0	16	0	0	23	18	8	0	0	17	0	0	0	0	0	0	0	0	0	22	0	0	0	0	22	17	14	0	8	0
ASV11478	Bacteria	Chloroflexi	KD4-96	norank_c__KD4-96	norank_o__norank_c__KD4-96	norank_f__norank_o__norank_c__KD4-96	uncultured_bacterium_g__norank_f__norank_o__norank_c__KD4-96	0.791431	0	0	0	0	0	0	0	0	0	0	0	0	0	0	0	0	0	0	16	0	0	26	0	0	0	0	0	0	0	0	0	0	0	0	0	0	0	0	0	0	10
ASV14248	Bacteria	Chloroflexi	KD4-96	norank_c__KD4-96	norank_o__norank_c__KD4-96	norank_f__norank_o__norank_c__KD4-96	uncultured_bacterium_g__norank_f__norank_o__norank_c__KD4-96	0.734456	0	0	0	0	0	0	0	0	0	0	0	0	0	0	0	0	0	0	0	0	0	0	0	0	0	0	0	0	0	45	41	0	37	0	0	0	47	42	0	0	0
ASV219	Bacteria	Chloroflexi	KD4-96	norank_c__KD4-96	norank_o__norank_c__KD4-96	norank_f__norank_o__norank_c__KD4-96	uncultured_bacterium_g__norank_f__norank_o__norank_c__KD4-96	0.769255	24	8	13	13	22	0	0	8	0	14	0	18	0	8	11	6	5	7	18	9	0	36	11	7	17	17	10	0	0	0	20	18	0	0	0	17	0	0	7	11	9
ASV4615	Bacteria	Chloroflexi	KD4-96	norank_c__KD4-96	norank_o__norank_c__KD4-96	norank_f__norank_o__norank_c__KD4-96	NA	0.999999	0	0	0	54	62	0	0	0	0	47	39	74	0	22	51	0	0	0	60	0	0	132	28	0	0	46	38	0	0	0	0	56	0	0	0	0	0	0	0	0	61
ASV487	Bacteria	Chloroflexi	KD4-96	norank_c__KD4-96	norank_o__norank_c__KD4-96	norank_f__norank_o__norank_c__KD4-96	NA	0.999998	15	0	0	35	41	0	0	13	0	26	22	42	0	22	0	18	0	16	0	18	18	66	0	0	0	0	0	0	0	0	0	33	0	0	0	0	16	18	0	0	34
ASV183	Bacteria	Chloroflexi	KD4-96	norank_c__KD4-96	norank_o__norank_c__KD4-96	norank_f__norank_o__norank_c__KD4-96	uncultured_Chloroflexi_bacterium_g__norank_f__norank_o__norank_c__KD4-96	0.717769	26	0	0	0	0	0	0	0	0	0	0	0	0	0	0	36	36	0	0	0	0	0	0	23	0	0	0	0	0	0	37	0	0	0	0	0	0	0	15	0	0
ASV4660	Bacteria	Chloroflexi	KD4-96	norank_c__KD4-96	norank_o__norank_c__KD4-96	norank_f__norank_o__norank_c__KD4-96	uncultured_Chloroflexi_bacterium_g__norank_f__norank_o__norank_c__KD4-96	0.71882	0	0	0	28	0	0	0	0	0	19	21	0	0	0	15	0	0	0	0	0	0	9	0	0	0	0	0	0	0	0	0	0	0	0	0	0	0	0	0	0	0
ASV1604	Bacteria	Chloroflexi	KD4-96	norank_c__KD4-96	norank_o__norank_c__KD4-96	norank_f__norank_o__norank_c__KD4-96	NA	0.999998	0	39	30	0	26	0	20	0	37	0	0	21	0	14	0	18	0	23	35	28	33	28	0	0	32	14	0	0	20	24	0	32	0	12	0	16	24	36	0	30	28
ASV581	Bacteria	Chloroflexi	KD4-96	norank_c__KD4-96	norank_o__norank_c__KD4-96	norank_f__norank_o__norank_c__KD4-96	uncultured_bacterium_g__norank_f__norank_o__norank_c__KD4-96	0.891596	13	0	0	0	0	0	0	11	0	0	0	0	9	0	0	0	0	0	0	0	15	0	0	17	0	0	0	28	0	0	0	0	0	0	16	22	11	14	0	0	0
ASV1847	Bacteria	Chloroflexi	KD4-96	norank_c__KD4-96	norank_o__norank_c__KD4-96	norank_f__norank_o__norank_c__KD4-96	NA	0.999998	0	17	0	0	0	0	0	11	0	0	0	0	0	0	0	0	0	22	0	0	13	0	0	0	0	0	0	0	0	0	0	0	8	0	0	0	23	24	0	0	0
ASV6433	Bacteria	Chloroflexi	KD4-96	norank_c__KD4-96	norank_o__norank_c__KD4-96	norank_f__norank_o__norank_c__KD4-96	NA	0.999997	0	0	0	0	0	12	12	0	0	0	0	0	11	0	0	15	0	0	0	15	0	0	0	0	0	0	0	9	13	0	0	0	0	0	0	17	0	0	0	0	0
ASV175	Bacteria	Chloroflexi	KD4-96	norank_c__KD4-96	norank_o__norank_c__KD4-96	norank_f__norank_o__norank_c__KD4-96	uncultured_bacterium_g__norank_f__norank_o__norank_c__KD4-96	0.968651	26	6	0	0	6	11	8	18	17	0	0	0	17	0	0	14	6	15	0	8	9	5	4	9	0	0	0	8	8	13	40	0	10	0	0	19	13	15	12	21	0
ASV8426	Bacteria	Chloroflexi	KD4-96	norank_c__KD4-96	norank_o__norank_c__KD4-96	norank_f__norank_o__norank_c__KD4-96	NA	0.999999	0	0	0	0	0	0	0	0	0	0	14	0	0	0	0	0	0	0	21	0	0	0	0	0	0	0	0	0	0	0	0	24	0	0	0	0	0	0	0	0	0
ASV9194	Bacteria	Chloroflexi	KD4-96	norank_c__KD4-96	norank_o__norank_c__KD4-96	norank_f__norank_o__norank_c__KD4-96	uncultured_bacterium_g__norank_f__norank_o__norank_c__KD4-96	0.904509	0	0	0	0	0	0	0	0	0	0	0	0	9	0	0	14	0	13	0	10	0	0	0	0	0	0	0	0	0	12	15	0	9	0	0	20	0	0	0	15	0
ASV4276	Bacteria	Chloroflexi	KD4-96	norank_c__KD4-96	norank_o__norank_c__KD4-96	norank_f__norank_o__norank_c__KD4-96	NA	0.999983	0	0	5	0	5	0	0	0	0	9	10	6	13	0	0	6	3	7	8	0	11	14	9	0	12	8	0	9	0	10	8	10	5	0	0	12	0	0	0	0	10
ASV731	Bacteria	Chloroflexi	KD4-96	norank_c__KD4-96	norank_o__norank_c__KD4-96	norank_f__norank_o__norank_c__KD4-96	uncultured_Chloroflexi_bacterium_g__norank_f__norank_o__norank_c__KD4-96	0.978537	10	19	0	10	0	0	12	10	25	0	0	5	20	13	0	52	29	10	0	6	26	0	0	35	0	0	0	38	8	27	29	0	13	0	6	51	40	27	7	15	0
ASV3672	Bacteria	Chloroflexi	KD4-96	norank_c__KD4-96	norank_o__norank_c__KD4-96	norank_f__norank_o__norank_c__KD4-96	uncultured_Chloroflexi_bacterium_g__norank_f__norank_o__norank_c__KD4-96	0.971358	0	0	12	0	12	0	0	0	0	10	6	0	0	0	0	0	0	0	18	0	0	9	0	0	0	0	0	0	0	0	0	6	0	0	0	0	0	0	0	0	0
ASV965	Bacteria	Chloroflexi	KD4-96	norank_c__KD4-96	norank_o__norank_c__KD4-96	norank_f__norank_o__norank_c__KD4-96	NA	0.999998	7	25	50	68	53	0	13	0	42	33	27	118	29	33	48	40	28	16	79	6	20	70	61	17	109	72	21	14	0	24	21	63	14	14	0	45	49	39	16	11	49
ASV7373	Bacteria	Chloroflexi	KD4-96	norank_c__KD4-96	norank_o__norank_c__KD4-96	norank_f__norank_o__norank_c__KD4-96	uncultured_bacterium_g__norank_f__norank_o__norank_c__KD4-96	0.879176	0	0	0	0	0	0	0	24	22	0	0	0	0	0	0	26	0	0	0	0	38	0	0	0	0	0	0	17	0	28	0	0	0	0	0	0	0	0	0	0	0
ASV189	Bacteria	Chloroflexi	KD4-96	norank_c__KD4-96	norank_o__norank_c__KD4-96	norank_f__norank_o__norank_c__KD4-96	uncultured_bacterium_g__norank_f__norank_o__norank_c__KD4-96	0.872873	26	0	0	0	0	0	0	0	0	0	0	0	23	0	0	0	0	0	0	32	0	0	0	21	0	0	0	0	0	0	0	0	0	0	0	0	0	24	0	0	0
ASV3038	Bacteria	Chloroflexi	KD4-96	norank_c__KD4-96	norank_o__norank_c__KD4-96	norank_f__norank_o__norank_c__KD4-96	uncultured_bacterium_g__norank_f__norank_o__norank_c__KD4-96	0.806248	0	0	47	41	68	0	18	0	0	43	38	69	0	31	62	0	23	0	54	0	0	82	22	0	36	39	31	0	0	0	33	72	0	0	0	37	32	0	0	0	63
ASV139	Bacteria	Chloroflexi	KD4-96	norank_c__KD4-96	norank_o__norank_c__KD4-96	norank_f__norank_o__norank_c__KD4-96	NA	0.999999	29	28	0	0	0	0	0	0	0	0	0	0	12	0	0	0	16	0	0	0	0	0	0	0	0	0	0	0	0	0	0	0	22	0	0	0	0	0	0	31	0
ASV245	Bacteria	Chloroflexi	KD4-96	norank_c__KD4-96	norank_o__norank_c__KD4-96	norank_f__norank_o__norank_c__KD4-96	uncultured_bacterium_g__norank_f__norank_o__norank_c__KD4-96	0.749613	23	22	0	0	0	0	0	0	0	0	0	0	11	0	0	20	0	0	0	0	24	0	0	0	0	0	0	0	0	0	36	0	0	0	0	0	33	0	0	0	0
ASV7757	Bacteria	Chloroflexi	KD4-96	norank_c__KD4-96	norank_o__norank_c__KD4-96	norank_f__norank_o__norank_c__KD4-96	uncultured_bacterium_g__norank_f__norank_o__norank_c__KD4-96	0.764005	0	0	0	0	0	0	0	0	10	0	0	0	0	0	0	0	20	0	0	0	0	0	0	0	0	0	0	0	0	0	0	0	16	0	0	0	0	0	0	17	0
ASV6757	Bacteria	Chloroflexi	KD4-96	norank_c__KD4-96	norank_o__norank_c__KD4-96	norank_f__norank_o__norank_c__KD4-96	uncultured_bacterium_g__norank_f__norank_o__norank_c__KD4-96	0.921919	0	0	0	0	0	0	13	0	19	0	0	0	0	0	0	0	0	0	0	0	0	0	0	18	0	0	0	22	0	17	15	0	0	0	0	21	0	20	0	0	0
ASV11266	Bacteria	Chloroflexi	KD4-96	norank_c__KD4-96	norank_o__norank_c__KD4-96	norank_f__norank_o__norank_c__KD4-96	uncultured_bacterium_g__norank_f__norank_o__norank_c__KD4-96	0.842624	0	0	0	0	0	0	0	0	0	0	0	0	0	0	0	0	0	10	0	0	0	0	0	0	0	0	0	0	0	0	0	0	0	25	0	0	0	0	13	0	0
ASV3599	Bacteria	Chloroflexi	KD4-96	norank_c__KD4-96	norank_o__norank_c__KD4-96	norank_f__norank_o__norank_c__KD4-96	NA	0.999969	0	0	13	16	20	0	0	0	0	27	9	51	0	7	12	5	0	0	26	0	5	35	5	7	8	12	6	6	0	5	0	24	0	0	0	0	9	12	0	0	13
ASV4468	Bacteria	Chloroflexi	OLB14	norank_c__OLB14	norank_o__norank_c__OLB14	norank_f__norank_o__norank_c__OLB14	NA	0.999549	0	0	3	0	0	0	7	0	15	0	0	0	6	0	0	17	24	4	0	0	8	0	0	14	0	0	0	20	0	12	18	0	0	7	9	11	13	0	4	18	0
ASV1209	Bacteria	Chloroflexi	OLB14	norank_c__OLB14	norank_o__norank_c__OLB14	norank_f__norank_o__norank_c__OLB14	NA	0.959574	5	16	0	0	0	15	25	14	16	0	0	0	10	0	0	18	12	19	0	26	24	0	0	8	0	0	0	0	27	20	13	0	21	7	0	6	19	24	11	10	0
ASV234	Bacteria	Chloroflexi	OLB14	norank_c__OLB14	norank_o__norank_c__OLB14	norank_f__norank_o__norank_c__OLB14	NA	0.971924	23	43	23	22	26	12	57	18	45	22	8	32	35	48	14	19	26	25	19	24	59	19	11	57	8	14	16	34	22	60	29	23	7	20	30	26	66	47	25	33	27
ASV371	Bacteria	Chloroflexi	OLB14	norank_c__OLB14	norank_o__norank_c__OLB14	norank_f__norank_o__norank_c__OLB14	uncultured_bacterium_g__norank_f__norank_o__norank_c__OLB14	0.811706	18	0	0	0	0	0	0	18	0	0	0	0	12	0	0	45	20	29	0	14	0	0	0	0	0	0	0	13	21	0	26	0	18	0	0	12	0	0	0	16	23
ASV1717	Bacteria	Chloroflexi	OLB14	norank_c__OLB14	norank_o__norank_c__OLB14	norank_f__norank_o__norank_c__OLB14	uncultured_bacterium_g__norank_f__norank_o__norank_c__OLB14	0.953574	0	23	0	0	0	0	0	0	0	0	0	0	0	0	0	11	0	0	0	0	0	0	0	0	0	0	0	0	0	0	0	0	0	16	0	0	0	0	0	0	0
ASV3032	Bacteria	Chloroflexi	OLB14	norank_c__OLB14	norank_o__norank_c__OLB14	norank_f__norank_o__norank_c__OLB14	uncultured_bacterium_g__norank_f__norank_o__norank_c__OLB14	0.8958	0	0	50	124	153	12	29	0	0	63	27	160	0	116	44	0	0	0	85	0	30	92	91	24	68	72	53	0	0	27	0	90	0	0	4	0	30	20	26	0	129
ASV1046	Bacteria	Chloroflexi	OLB14	norank_c__OLB14	norank_o__norank_c__OLB14	norank_f__norank_o__norank_c__OLB14	uncultured_bacterium_g__norank_f__norank_o__norank_c__OLB14	0.763263	6	10	0	0	0	0	12	0	12	0	0	0	0	0	0	17	11	14	0	14	0	0	0	12	0	0	0	7	14	10	0	0	11	7	0	11	23	13	10	0	0
ASV1782	Bacteria	Chloroflexi	Dehalococcoidia	S085	norank_o__S085	norank_f__norank_o__S085	uncultured_bacterium_g__norank_f__norank_o__S085	0.979966	0	19	17	8	9	4	20	3	24	6	7	7	12	12	0	11	7	11	12	21	20	5	5	26	15	7	5	5	16	10	11	3	7	22	5	10	39	16	11	8	0
ASV3482	Bacteria	Chloroflexi	Dehalococcoidia	S085	norank_o__S085	norank_f__norank_o__S085	uncultured_bacterium_g__norank_f__norank_o__S085	0.99026	0	0	16	9	23	0	0	0	0	8	9	9	0	19	12	0	0	0	15	0	0	10	29	0	0	0	13	0	0	0	0	9	0	0	0	0	0	0	0	0	15
ASV4685	Bacteria	Chloroflexi	JG30-KF-CM66	norank_c__JG30-KF-CM66	norank_o__norank_c__JG30-KF-CM66	norank_f__norank_o__norank_c__JG30-KF-CM66	metagenome_g__norank_f__norank_o__norank_c__JG30-KF-CM66	0.837175	0	0	0	23	7	0	0	0	0	0	18	16	0	8	0	0	0	0	0	0	0	17	14	0	7	17	0	0	0	0	11	0	0	0	0	6	13	0	15	0	12
ASV3284	Bacteria	Chloroflexi	JG30-KF-CM66	norank_c__JG30-KF-CM66	norank_o__norank_c__JG30-KF-CM66	norank_f__norank_o__norank_c__JG30-KF-CM66	NA	0.999833	0	0	22	0	0	0	0	0	0	16	0	13	0	0	0	0	0	0	0	0	0	0	0	0	14	17	0	0	0	0	0	8	0	0	0	0	0	0	0	0	17
ASV1058	Bacteria	Chloroflexi	JG30-KF-CM66	norank_c__JG30-KF-CM66	norank_o__norank_c__JG30-KF-CM66	norank_f__norank_o__norank_c__JG30-KF-CM66	NA	0.999855	6	13	0	0	0	0	0	0	0	0	0	0	10	0	17	15	7	0	0	5	10	0	0	18	0	0	13	0	10	0	9	0	11	0	7	7	15	0	0	15	0
ASV3692	Bacteria	Chloroflexi	JG30-KF-CM66	norank_c__JG30-KF-CM66	norank_o__norank_c__JG30-KF-CM66	norank_f__norank_o__norank_c__JG30-KF-CM66	uncultured_Chloroflexi_bacterium_g__norank_f__norank_o__norank_c__JG30-KF-CM66	0.888313	0	0	12	0	12	0	14	0	0	0	0	0	0	20	0	0	0	0	14	0	0	13	12	0	0	8	0	0	0	0	0	0	0	0	0	0	0	0	0	0	0
ASV2195	Bacteria	Chloroflexi	JG30-KF-CM66	norank_c__JG30-KF-CM66	norank_o__norank_c__JG30-KF-CM66	norank_f__norank_o__norank_c__JG30-KF-CM66	NA	0.999338	0	9	15	26	16	2	8	3	7	0	8	21	4	14	16	12	5	0	23	9	0	20	19	0	14	34	7	0	7	6	6	25	0	0	0	3	0	5	8	6	0
ASV3340	Bacteria	Armatimonadota	Chthonomonadetes	Chthonomonadales	norank_o__Chthonomonadales	norank_f__norank_o__Chthonomonadales	uncultured_bacterium_g__norank_f__norank_o__Chthonomonadales	0.991497	0	0	20	24	6	0	0	0	0	10	7	34	0	17	0	0	0	0	16	0	0	14	0	0	18	14	0	0	0	0	0	6	0	0	0	0	0	0	0	0	29
ASV3428	Bacteria	Armatimonadota	Chthonomonadetes	Chthonomonadales	norank_o__Chthonomonadales	norank_f__norank_o__Chthonomonadales	uncultured_bacterium_g__norank_f__norank_o__Chthonomonadales	0.994439	0	0	17	18	14	0	0	0	0	11	0	23	0	10	7	0	0	0	17	0	0	8	8	3	13	10	0	0	0	0	0	8	0	0	0	0	0	0	0	0	23
ASV1843	Bacteria	Chloroflexi	Anaerolineae	Ardenticatenales	Ardenticatenaceae	norank_f__Ardenticatenaceae	uncultured_bacterium_g__norank_f__Ardenticatenaceae	0.920766	0	17	0	0	0	0	11	0	0	0	0	0	0	0	0	0	0	0	0	0	20	0	0	0	0	0	0	0	20	0	29	0	0	47	0	0	0	0	0	0	0
ASV10781	Bacteria	Chloroflexi	Anaerolineae	Ardenticatenales	Ardenticatenaceae	norank_f__Ardenticatenaceae	uncultured_bacterium_g__norank_f__Ardenticatenaceae	0.93148	0	0	0	0	0	0	0	0	0	0	0	0	0	0	0	0	21	0	0	0	0	0	0	0	0	0	0	0	0	0	0	0	0	0	0	0	43	0	0	0	0
ASV11228	Bacteria	Chloroflexi	Anaerolineae	Ardenticatenales	Ardenticatenaceae	norank_f__Ardenticatenaceae	uncultured_bacterium_g__norank_f__Ardenticatenaceae	0.881989	0	0	0	0	0	0	0	0	0	0	0	0	0	0	0	0	0	24	0	0	21	0	0	0	0	0	0	0	0	0	0	14	0	0	0	0	0	0	0	0	0
ASV869	Bacteria	Planctomycetota	Phycisphaerae	Tepidisphaerales	norank_o__Tepidisphaerales	norank_f__norank_o__Tepidisphaerales	uncultured_Planctomycetales_bacterium_g__norank_f__norank_o__Tepidisphaerales	0.976165	8	21	0	0	0	4	16	0	32	0	0	0	7	0	0	13	18	6	0	3	16	0	0	0	0	0	0	0	0	18	20	0	9	3	0	3	28	29	2	6	0
ASV3334	Bacteria	Planctomycetota	Phycisphaerae	Tepidisphaerales	norank_o__Tepidisphaerales	norank_f__norank_o__Tepidisphaerales	uncultured_Planctomycetales_bacterium_g__norank_f__norank_o__Tepidisphaerales	0.999972	0	0	20	33	16	0	0	0	0	5	5	15	0	21	7	0	0	0	23	0	0	14	9	0	11	6	3	0	0	0	0	11	0	0	0	0	0	0	0	0	17
ASV851	Bacteria	Planctomycetota	Phycisphaerae	Tepidisphaerales	norank_o__Tepidisphaerales	norank_f__norank_o__Tepidisphaerales	uncultured_Planctomycetales_bacterium_g__norank_f__norank_o__Tepidisphaerales	0.999943	8	8	0	0	0	0	8	3	11	0	0	0	10	0	0	12	15	11	0	11	18	0	0	8	0	0	0	3	5	7	13	0	0	12	0	0	14	21	4	7	0
ASV848	Bacteria	Planctomycetota	Phycisphaerae	Phycisphaerales	Phycisphaeraceae	NA	NA	0.99999	8	22	0	0	0	5	21	5	16	0	0	0	7	0	0	4	10	9	0	20	22	0	0	9	0	0	0	0	17	23	4	0	7	0	0	5	38	21	6	8	0
ASV783	Bacteria	Planctomycetota	Phycisphaerae	Phycisphaerales	Phycisphaeraceae	AKYG587	NA	0.999997	9	14	0	0	0	13	19	12	30	0	0	0	16	0	0	14	17	16	0	17	26	0	0	30	0	0	0	25	26	24	14	0	0	11	10	16	28	20	15	24	0
ASV987	Bacteria	Planctomycetota	Phycisphaerae	Phycisphaerales	Phycisphaeraceae	AKYG587	uncultured_bacterium_g__AKYG587	0.961392	7	5	0	0	0	0	18	9	9	0	0	0	16	0	0	10	7	0	0	0	6	0	0	0	0	0	0	6	12	9	0	0	13	0	0	0	10	7	0	5	0
ASV1870	Bacteria	Planctomycetota	Phycisphaerae	Phycisphaerales	Phycisphaeraceae	SM1A02	NA	0.999516	0	16	0	0	0	0	0	0	7	0	0	0	8	0	0	0	0	0	0	0	0	0	0	0	0	0	0	0	0	11	0	0	0	0	0	0	0	0	8	9	0
ASV556	Bacteria	Bacteroidota	Bacteroidia	Chitinophagales	Chitinophagaceae	Edaphobaculum	NA	0.999732	13	9	0	0	0	0	9	0	0	0	0	0	9	0	0	30	11	10	0	9	9	0	0	0	0	0	0	12	11	13	16	0	10	0	32	26	0	9	0	4	0
ASV1263	Bacteria	Bacteroidota	Bacteroidia	Chitinophagales	Chitinophagaceae	Edaphobaculum	NA	0.990294	4	0	0	0	0	0	0	6	0	0	0	0	4	2	0	13	9	8	0	0	15	0	4	17	0	0	0	15	4	9	12	0	4	0	20	0	7	14	20	5	3
ASV850	Bacteria	Bacteroidota	Bacteroidia	Chitinophagales	Chitinophagaceae	norank_f__Chitinophagaceae	NA	0.758915	8	4	0	14	4	9	13	7	9	0	0	10	0	4	0	7	14	9	0	10	4	4	0	3	0	3	0	2	10	0	2	2	13	4	0	4	8	4	5	7	4
ASV4735	Bacteria	Bacteroidota	Bacteroidia	Chitinophagales	Chitinophagaceae	Flavisolibacter	NA	0.816359	0	0	0	18	14	0	0	0	0	17	0	23	0	21	0	0	0	0	0	0	0	19	0	0	9	11	8	0	0	0	0	20	0	0	0	0	0	0	0	0	19
ASV3525	Bacteria	Bacteroidota	Bacteroidia	Chitinophagales	Chitinophagaceae	Flavisolibacter	NA	0.832588	0	0	15	61	36	0	0	0	0	18	16	40	0	50	15	0	0	0	21	0	0	28	27	0	7	21	24	0	0	0	0	58	0	0	0	0	0	0	0	0	40
ASV262	Bacteria	Bacteroidota	Bacteroidia	Chitinophagales	Chitinophagaceae	Flavisolibacter	NA	0.713097	22	36	0	0	0	25	48	22	18	0	0	0	21	0	0	57	28	31	0	40	30	0	0	35	0	0	0	46	48	36	25	0	26	11	93	51	34	35	44	16	0
ASV693	Bacteria	Bacteroidota	Bacteroidia	Chitinophagales	Chitinophagaceae	Flavisolibacter	uncultured_Chitinophagaceae_bacterium_g__Flavisolibacter	0.847701	11	7	5	5	5	16	8	10	14	0	0	4	5	20	5	15	4	15	12	17	8	0	4	8	0	3	9	10	9	12	12	4	0	8	27	14	13	0	15	9	10
ASV4756	Bacteria	Bacteroidota	Bacteroidia	Chitinophagales	Chitinophagaceae	Flavisolibacter	NA	0.981513	0	0	0	17	23	0	0	0	0	11	15	17	0	22	0	0	0	0	26	0	0	12	21	19	0	12	0	0	0	0	10	0	0	0	28	0	0	0	0	0	39
ASV3445	Bacteria	Bacteroidota	Bacteroidia	Chitinophagales	Chitinophagaceae	Flavisolibacter	NA	0.989223	0	0	17	0	0	0	0	0	0	0	0	0	0	0	20	0	0	0	0	0	0	0	0	0	0	0	0	0	0	0	0	0	0	0	0	0	0	0	0	0	0
ASV3221	Bacteria	Bacteroidota	Bacteroidia	Chitinophagales	Chitinophagaceae	Flavisolibacter	NA	0.929715	0	0	25	8	11	0	0	0	0	10	8	26	0	12	0	0	0	0	8	0	0	6	14	0	36	16	23	0	0	0	0	14	0	8	9	0	7	0	0	0	13
ASV3754	Bacteria	Bacteroidota	Bacteroidia	Chitinophagales	Chitinophagaceae	Flaviaesturariibacter	uncultured_bacterium_g__Flaviaesturariibacter	0.99728	0	0	10	16	15	0	0	0	0	12	0	25	0	19	9	0	0	4	13	0	0	15	12	0	7	28	15	0	0	0	0	8	0	6	5	0	0	6	0	0	27
ASV6671	Bacteria	Bacteroidota	Bacteroidia	Chitinophagales	Chitinophagaceae	norank_f__Chitinophagaceae	uncultured_microorganism_g__norank_f__Chitinophagaceae	0.999319	0	0	0	0	0	0	22	0	20	0	0	0	0	0	0	0	0	0	0	0	0	0	0	0	0	0	0	0	0	20	0	0	0	30	0	0	0	0	0	0	0
ASV3402	Bacteria	Bacteroidota	Bacteroidia	Chitinophagales	Chitinophagaceae	norank_f__Chitinophagaceae	uncultured_microorganism_g__norank_f__Chitinophagaceae	0.999801	0	0	18	0	36	0	0	0	0	0	0	43	0	0	0	0	0	0	0	0	0	25	0	0	0	0	0	0	0	0	0	0	0	0	0	0	0	20	0	0	25
ASV974	Bacteria	Bacteroidota	Bacteroidia	Chitinophagales	Chitinophagaceae	norank_f__Chitinophagaceae	uncultured_microorganism_g__norank_f__Chitinophagaceae	0.99776	7	21	0	26	10	0	21	0	0	21	15	34	0	33	16	27	15	0	16	0	29	13	21	16	14	21	31	23	0	0	12	20	0	0	15	0	21	18	25	15	18
ASV1728	Bacteria	Bacteroidota	Bacteroidia	Chitinophagales	Chitinophagaceae	NA	NA	0.999709	0	22	0	0	0	27	33	5	15	0	0	0	14	0	0	9	8	23	0	19	22	0	0	9	0	0	0	15	23	13	9	0	0	21	0	0	17	9	14	13	0
ASV397	Bacteria	Bacteroidota	Bacteroidia	Chitinophagales	Chitinophagaceae	Aurantisolimonas	NA	0.999993	17	19	0	0	0	2	9	0	2	0	0	0	5	0	0	11	24	7	0	6	15	0	0	5	0	0	0	2	0	11	5	0	5	11	18	7	18	9	13	3	0
ASV921	Bacteria	Bacteroidota	Bacteroidia	Chitinophagales	Chitinophagaceae	Aurantisolimonas	NA	0.999976	8	8	0	0	0	11	6	0	11	0	0	0	10	0	0	23	17	14	0	19	14	0	0	0	0	0	0	4	16	15	6	0	21	4	15	4	8	17	10	0	0
ASV235	Bacteria	Bacteroidota	Bacteroidia	Chitinophagales	Chitinophagaceae	Ferruginibacter	NA	0.998892	23	50	9	0	8	17	16	28	17	0	5	13	11	0	7	44	82	24	9	29	46	9	18	39	10	11	24	28	13	57	28	7	33	0	137	32	33	50	54	13	14
ASV3441	Bacteria	Bacteroidota	Bacteroidia	Chitinophagales	Chitinophagaceae	Terrimonas	NA	0.989946	0	0	17	8	8	0	0	0	0	0	0	18	0	20	0	0	0	0	15	0	0	8	0	0	15	15	11	0	0	0	0	0	0	0	0	0	0	0	0	0	8
ASV338	Bacteria	Bacteroidota	Bacteroidia	Chitinophagales	Chitinophagaceae	Terrimonas	NA	0.942963	19	28	15	84	26	0	57	21	13	13	10	50	29	61	13	18	47	22	22	15	20	31	12	19	21	31	17	17	19	15	14	61	22	20	16	15	46	15	14	19	28
ASV3215	Bacteria	Bacteroidota	Bacteroidia	Chitinophagales	Chitinophagaceae	Terrimonas	NA	0.994312	0	0	25	18	12	0	0	0	0	0	8	12	0	37	12	0	0	0	27	0	0	9	25	0	19	13	7	0	0	0	0	13	0	0	0	0	0	0	0	0	24
ASV1892	Bacteria	Bacteroidota	Bacteroidia	Chitinophagales	Chitinophagaceae	Terrimonas	NA	0.989708	0	16	0	0	0	0	16	0	22	0	0	0	0	0	0	19	12	0	0	15	0	0	0	0	0	0	0	18	13	0	0	0	0	0	16	0	11	0	17	0	0
ASV1837	Bacteria	Bacteroidota	Bacteroidia	Chitinophagales	Chitinophagaceae	Terrimonas	NA	0.989165	0	17	0	0	0	17	27	15	0	0	0	0	27	0	0	11	12	24	0	15	19	0	0	16	0	0	0	0	27	20	14	0	23	16	0	13	16	20	0	11	0
ASV3351	Bacteria	Bacteroidota	Bacteroidia	Chitinophagales	Chitinophagaceae	Terrimonas	NA	0.995717	0	0	20	0	0	0	0	0	0	0	0	25	0	13	21	0	0	0	0	0	0	11	0	0	0	0	15	0	0	0	0	0	0	0	0	0	0	0	0	0	15
ASV103	Bacteria	Bacteroidota	Bacteroidia	Chitinophagales	Chitinophagaceae	Terrimonas	NA	0.996905	34	0	25	35	27	31	37	21	34	42	0	28	0	65	40	32	29	41	34	35	47	24	0	28	17	24	46	41	53	0	29	30	0	0	0	0	48	45	36	0	43
ASV1632	Bacteria	Bacteroidota	Bacteroidia	Chitinophagales	Chitinophagaceae	Terrimonas	NA	0.994336	0	32	0	0	0	0	0	0	0	0	22	0	0	0	0	37	0	0	0	0	0	0	0	0	0	0	0	0	0	0	0	0	0	0	0	0	0	0	0	0	0
ASV4653	Bacteria	Bacteroidota	Bacteroidia	Chitinophagales	Chitinophagaceae	Terrimonas	NA	0.992321	0	0	0	29	17	0	0	0	0	0	0	30	0	0	0	0	0	0	0	0	0	30	39	0	20	28	22	0	0	0	0	10	0	0	0	0	0	0	0	0	0
ASV991	Bacteria	Bacteroidota	Bacteroidia	Chitinophagales	Chitinophagaceae	Flavihumibacter	NA	0.999545	7	10	0	0	0	12	18	7	11	0	0	0	8	0	0	18	0	15	0	12	14	0	0	0	0	0	0	11	10	13	6	0	5	11	4	10	6	6	17	7	0
ASV1262	Bacteria	Bacteroidota	Bacteroidia	Chitinophagales	Chitinophagaceae	NA	NA	0.999996	4	10	0	0	0	0	17	0	17	0	0	0	13	0	0	8	9	0	0	3	18	0	0	18	0	0	0	10	4	6	10	0	4	8	0	13	18	0	8	7	0
ASV3207	Bacteria	Bacteroidota	Bacteroidia	Chitinophagales	Chitinophagaceae	norank_f__Chitinophagaceae	NA	0.853752	0	0	26	15	12	0	0	0	0	5	3	10	0	23	12	0	0	0	8	0	0	7	18	0	20	27	5	0	0	0	0	12	0	0	0	0	0	0	0	0	11
ASV880	Bacteria	Bacteroidota	Bacteroidia	Chitinophagales	Chitinophagaceae	NA	NA	0.999996	8	25	10	5	5	0	16	25	12	0	0	0	11	0	0	0	10	17	0	0	31	9	0	33	24	0	0	20	18	19	12	0	0	0	33	10	18	39	40	11	13
ASV5833	Bacteria	Bacteroidota	Bacteroidia	Chitinophagales	Chitinophagaceae	Ferruginibacter	NA	0.717978	0	0	0	0	9	0	0	0	0	25	20	22	0	0	0	0	10	0	24	0	0	0	0	0	23	0	16	10	0	0	0	23	0	0	0	0	12	0	0	0	25
ASV3059	Bacteria	Bacteroidota	Bacteroidia	Chitinophagales	Chitinophagaceae	norank_f__Chitinophagaceae	NA	0.844375	0	0	41	26	33	0	0	0	0	19	20	19	0	83	21	0	0	0	41	0	0	14	45	0	16	0	31	0	0	0	0	22	0	0	0	0	0	0	0	0	42
ASV646	Bacteria	Bacteroidota	Bacteroidia	Chitinophagales	Chitinophagaceae	norank_f__Chitinophagaceae	NA	0.863871	12	0	17	0	0	19	0	18	20	0	0	0	27	39	0	29	23	0	0	19	0	0	0	0	0	14	0	41	0	0	0	0	21	0	22	0	0	0	0	34	0
ASV1953	Bacteria	Bacteroidota	Bacteroidia	Chitinophagales	Chitinophagaceae	norank_f__Chitinophagaceae	NA	0.868737	0	14	0	0	0	0	31	0	0	0	0	0	0	0	0	0	0	29	0	0	39	0	0	0	0	0	0	0	16	22	24	0	0	23	0	0	45	15	25	0	0
ASV3187	Bacteria	Bacteroidota	Bacteroidia	Chitinophagales	Chitinophagaceae	norank_f__Chitinophagaceae	NA	0.857728	0	0	27	30	36	0	0	0	0	20	0	0	0	60	35	0	0	0	25	0	0	31	34	0	17	17	20	0	0	0	0	29	0	0	0	0	0	0	0	0	45
ASV3105	Bacteria	Bacteroidota	Bacteroidia	Chitinophagales	Chitinophagaceae	NA	NA	0.999999	0	0	34	29	14	0	0	0	3	0	0	31	0	38	20	0	0	0	0	0	0	34	24	9	30	24	23	0	0	0	0	34	0	0	15	0	0	11	0	0	43
ASV703	Bacteria	Bacteroidota	Bacteroidia	Chitinophagales	Chitinophagaceae	UTBCD1	NA	0.702206	10	11	8	0	3	11	27	15	13	4	0	0	23	10	6	20	11	14	0	23	21	5	4	13	0	4	0	8	37	14	15	6	12	30	0	10	22	13	20	13	0
ASV1914	Bacteria	Bacteroidota	Bacteroidia	Chitinophagales	Chitinophagaceae	Puia	NA	0.99437	0	15	0	16	25	0	0	0	11	16	13	18	0	46	7	14	11	16	14	9	12	22	16	6	11	10	31	7	14	6	0	44	0	18	13	0	14	6	12	6	43
ASV3431	Bacteria	Bacteroidota	Bacteroidia	Chitinophagales	Chitinophagaceae	Puia	NA	0.853793	0	0	17	26	35	0	0	0	0	18	0	33	0	37	18	0	6	0	16	0	0	23	20	0	16	25	24	0	0	0	0	18	0	0	6	0	0	0	0	0	25
ASV1045	Bacteria	Bacteroidota	Bacteroidia	Chitinophagales	Chitinophagaceae	NA	NA	0.999999	6	7	12	9	11	18	14	18	0	8	6	0	8	18	0	13	18	10	20	14	7	8	15	19	23	11	7	10	15	11	0	0	14	0	78	26	8	8	13	8	18
ASV395	Bacteria	Bacteroidota	Bacteroidia	Chitinophagales	Chitinophagaceae	norank_f__Chitinophagaceae	bacterium_enrichment_culture_clone_D8	0.988444	17	25	10	0	5	18	21	16	28	2	6	9	10	5	11	29	43	20	7	22	33	7	11	47	8	11	12	56	13	46	11	9	14	6	125	27	24	42	27	3	15
ASV3416	Bacteria	Bacteroidota	Bacteroidia	Chitinophagales	Chitinophagaceae	Niastella	NA	0.987391	0	0	18	0	0	0	0	0	0	0	0	0	0	13	20	0	0	0	0	0	0	0	0	0	0	0	0	0	0	0	0	0	0	0	0	8	0	0	0	0	7
ASV3664	Bacteria	Bacteroidota	Bacteroidia	Chitinophagales	Chitinophagaceae	Niastella	NA	0.993324	0	0	12	11	0	0	0	0	0	0	0	18	0	8	0	0	0	0	8	0	0	11	0	0	8	0	13	0	0	0	0	0	0	0	0	0	0	0	0	0	0
ASV5619	Bacteria	Bacteroidota	Bacteroidia	Chitinophagales	Chitinophagaceae	Flavitalea	NA	0.999448	0	0	0	0	20	0	0	0	0	0	0	41	0	35	0	0	0	0	22	0	0	34	0	0	0	0	31	0	0	0	0	42	0	0	0	0	0	0	0	0	0
ASV3198	Bacteria	Bacteroidota	Bacteroidia	Chitinophagales	Chitinophagaceae	Flavitalea	NA	0.999713	0	0	27	33	0	18	0	0	0	0	0	0	0	0	0	0	0	0	0	0	0	0	36	0	30	43	0	0	26	0	0	0	0	0	0	0	0	0	0	0	33
ASV724	Bacteria	Bacteroidota	Bacteroidia	Chitinophagales	Chitinophagaceae	Flavitalea	uncultured_Chitinophagaceae_bacterium_g__Flavitalea	0.734247	10	18	14	17	16	0	16	19	13	23	11	19	12	36	20	0	0	22	15	16	27	0	18	14	15	16	21	22	0	0	19	8	0	22	35	14	19	25	38	10	19
ASV1179	Bacteria	Bacteroidota	Bacteroidia	Chitinophagales	Chitinophagaceae	Flavitalea	uncultured_bacterium_g__Flavitalea	0.969424	5	7	18	8	5	0	0	0	0	13	0	0	0	17	10	19	0	0	13	0	0	10	13	7	7	8	15	9	0	0	0	22	0	0	10	0	7	5	0	0	9
ASV3385	Bacteria	Bacteroidota	Bacteroidia	Chitinophagales	Chitinophagaceae	Flavisolibacter	NA	0.933718	0	0	18	12	14	0	0	0	0	6	3	17	0	12	7	0	0	0	13	0	0	9	10	0	9	17	11	0	0	0	0	9	0	0	0	0	0	0	0	0	23
ASV1021	Bacteria	Bacteroidota	Bacteroidia	Chitinophagales	Chitinophagaceae	Flavisolibacter	NA	0.975698	7	7	51	41	38	0	11	13	0	32	16	30	0	63	31	12	0	10	38	5	0	26	38	7	20	28	24	11	10	0	0	30	0	0	10	11	0	0	12	0	57
ASV1958	Bacteria	Bacteroidota	Bacteroidia	Chitinophagales	Chitinophagaceae	Flavisolibacter	uncultured_soil_bacterium_g__Flavisolibacter	0.782165	0	14	17	17	19	0	0	0	5	8	0	28	10	22	18	6	8	0	4	9	0	15	11	7	33	18	12	0	0	0	0	16	0	8	8	0	0	15	0	0	16
ASV3448	Bacteria	Bacteroidota	Bacteroidia	Chitinophagales	Chitinophagaceae	Flavisolibacter	NA	0.990849	0	0	17	6	13	0	0	8	0	6	0	0	0	22	7	0	0	0	17	0	6	13	10	5	14	13	13	6	0	11	0	8	0	0	0	0	9	0	0	7	19
ASV2632	Bacteria	Bacteroidota	Bacteroidia	Chitinophagales	Chitinophagaceae	Flavisolibacter	NA	0.969222	0	5	15	6	13	0	0	0	0	8	0	0	0	28	7	0	6	7	16	0	0	7	15	0	0	0	0	7	0	0	5	0	0	0	0	0	0	0	0	0	26
ASV1734	Bacteria	Bacteroidota	Bacteroidia	Chitinophagales	Chitinophagaceae	NA	NA	0.999415	0	22	13	22	0	16	40	0	11	0	0	0	11	0	14	24	12	17	0	16	21	0	0	10	8	9	11	0	13	21	7	0	18	0	0	6	25	26	25	9	0
ASV3202	Bacteria	Bacteroidota	Bacteroidia	Chitinophagales	Chitinophagaceae	NA	NA	0.999619	0	0	27	0	22	0	0	0	0	23	0	35	0	29	0	0	0	0	22	0	0	20	43	0	21	16	17	0	0	0	0	22	0	0	0	0	0	0	0	0	23
ASV403	Bacteria	Bacteroidota	Bacteroidia	Chitinophagales	Chitinophagaceae	Lacibacter	NA	0.999461	17	14	0	15	9	0	22	15	19	0	0	34	10	0	0	21	28	14	4	6	0	15	7	4	6	24	2	9	0	6	15	27	9	28	7	11	22	11	12	6	7
ASV5125	Bacteria	Bacteroidota	Bacteroidia	Chitinophagales	Chitinophagaceae	Lacibacter	NA	0.998785	0	0	0	7	0	0	8	0	0	0	0	8	9	0	0	16	19	0	0	0	18	0	0	0	0	0	0	0	0	0	0	0	0	0	0	0	0	0	0	33	0
ASV91	Bacteria	Bacteroidota	Bacteroidia	Chitinophagales	Saprospiraceae	norank_f__Saprospiraceae	NA	0.999789	35	37	17	0	0	39	62	49	47	0	0	0	32	45	0	60	35	49	0	85	65	0	16	12	0	0	0	55	66	98	57	0	42	18	29	46	34	27	45	38	0
ASV1090	Bacteria	Bacteroidota	Bacteroidia	Chitinophagales	Saprospiraceae	norank_f__Saprospiraceae	NA	0.999956	6	21	0	0	0	11	20	8	18	0	0	0	0	0	0	29	15	20	0	15	32	0	0	0	0	0	0	0	16	17	6	0	7	88	5	0	13	13	9	0	0
ASV887	Bacteria	Bacteroidota	Bacteroidia	Chitinophagales	Saprospiraceae	norank_f__Saprospiraceae	uncultured_soil_bacterium_g__norank_f__Saprospiraceae	0.9641	8	26	22	24	26	8	30	11	12	16	10	25	17	49	13	16	17	5	19	0	21	16	19	21	19	13	15	13	17	14	11	13	7	0	12	8	23	14	18	4	23
ASV435	Bacteria	Bacteroidota	Bacteroidia	Chitinophagales	Saprospiraceae	norank_f__Saprospiraceae	uncultured_Haliscomenobacter_sp._g__norank_f__Saprospiraceae	0.967405	16	14	4	0	11	9	12	14	14	5	0	24	15	7	11	26	18	18	7	8	21	8	0	18	11	0	7	16	20	7	21	10	15	0	23	0	14	0	11	8	28
ASV775	Bacteria	Bacteroidota	Bacteroidia	Chitinophagales	Saprospiraceae	norank_f__Saprospiraceae	uncultured_Haliscomenobacter_sp._g__norank_f__Saprospiraceae	0.700014	10	16	0	0	0	0	28	0	0	0	0	0	0	0	0	25	22	15	0	8	9	0	0	0	0	0	0	0	11	11	10	0	9	0	0	0	9	13	0	10	0
ASV973	Bacteria	Bacteroidota	Bacteroidia	Chitinophagales	Saprospiraceae	norank_f__Saprospiraceae	NA	0.995811	7	25	10	8	0	20	43	23	19	0	0	0	10	0	0	39	45	21	9	9	32	0	0	11	0	8	0	7	23	34	17	5	9	14	0	9	35	23	32	17	5
ASV1071	Bacteria	Bacteroidota	Bacteroidia	Chitinophagales	Saprospiraceae	norank_f__Saprospiraceae	NA	0.998927	6	9	0	0	0	18	29	10	0	0	0	0	12	11	0	18	16	28	0	25	31	0	0	0	0	0	0	24	32	39	15	0	14	0	26	21	19	0	15	0	0
ASV3486	Bacteria	Bacteroidota	Bacteroidia	Chitinophagales	Saprospiraceae	norank_f__Saprospiraceae	uncultured_Haliscomenobacter_sp._g__norank_f__Saprospiraceae	0.965562	0	0	16	15	0	0	0	0	0	0	0	0	0	19	10	0	0	0	15	0	0	12	0	0	0	0	7	0	0	0	0	20	0	0	0	0	0	0	0	0	13
ASV656	Bacteria	Bacteroidota	Bacteroidia	Chitinophagales	Saprospiraceae	norank_f__Saprospiraceae	uncultured_soil_bacterium_g__norank_f__Saprospiraceae	0.919496	11	18	0	0	0	6	26	14	17	0	0	0	8	0	0	32	22	20	0	9	18	0	0	0	0	0	0	11	10	26	18	0	12	24	10	7	16	16	18	6	0
ASV4154	Bacteria	Bacteroidota	Bacteroidia	Chitinophagales	Saprospiraceae	norank_f__Saprospiraceae	uncultured_Haliscomenobacter_sp._g__norank_f__Saprospiraceae	0.711938	0	0	6	9	15	0	0	0	0	8	0	23	0	16	8	0	0	8	6	0	0	9	12	0	0	14	5	0	0	0	0	8	0	0	0	0	0	5	0	0	14
ASV4044	Bacteria	Bacteroidota	Bacteroidia	Chitinophagales	Saprospiraceae	norank_f__Saprospiraceae	NA	0.999969	0	0	7	0	19	0	0	0	0	7	0	17	0	17	7	0	0	0	13	0	0	14	7	0	0	7	9	0	0	0	0	11	0	0	0	0	0	0	0	0	20
ASV5014	Bacteria	Bacteroidota	Bacteroidia	Sphingobacteriales	Sphingobacteriaceae	Sphingobacterium	NA	1	0	0	0	8	6	144	0	38	0	11	0	0	15	8	0	0	13	0	0	3	18	0	0	0	1364	0	86	0	0	16	6	0	9	17	73	0	0	0	7	0	12
ASV348	Bacteria	Bacteroidota	Bacteroidia	Sphingobacteriales	Sphingobacteriaceae	Pedobacter	NA	0.90967	19	9	46	27	19	0	0	0	14	23	45	64	0	41	24	0	14	0	44	0	0	26	42	20	44	49	55	11	0	0	0	10	0	33	0	0	0	14	0	0	27
ASV7412	Bacteria	Bacteroidota	Bacteroidia	Sphingobacteriales	Sphingobacteriaceae	Pedobacter	Pedobacter_sp._MSCB-14	0.755294	0	0	0	0	0	0	0	12	25	0	0	0	5	0	0	0	0	0	0	14	11	0	0	30	0	0	9	0	24	0	0	0	0	0	10	10	8	21	0	0	0
ASV3584	Bacteria	Bacteroidota	Bacteroidia	Sphingobacteriales	Sphingobacteriaceae	Pedobacter	NA	0.970709	0	0	14	0	0	0	0	0	0	0	0	0	0	0	0	0	0	0	0	0	0	0	0	0	0	0	0	0	0	0	0	0	0	0	33	0	17	0	0	0	0
ASV204	Bacteria	Bacteroidota	Bacteroidia	Sphingobacteriales	Sphingobacteriaceae	Pedobacter	NA	0.999926	25	0	0	0	0	0	34	15	0	0	0	0	0	0	0	0	20	0	0	0	14	0	0	0	0	0	32	0	0	0	0	0	0	0	0	0	0	0	0	0	0
ASV4059	Bacteria	Bacteroidota	Bacteroidia	Sphingobacteriales	Sphingobacteriaceae	Pedobacter	NA	0.999784	0	0	7	32	41	0	0	18	0	16	12	13	13	26	19	0	14	9	9	16	13	44	9	0	0	24	20	12	0	0	12	38	0	12	15	0	16	35	17	28	38
ASV389	Bacteria	Bacteroidota	Bacteroidia	Sphingobacteriales	Sphingobacteriaceae	Pedobacter	NA	0.999956	18	56	0	0	0	61	0	0	0	0	0	0	0	0	0	0	0	22	0	110	0	0	0	0	0	0	0	0	49	33	0	0	39	0	104	25	14	0	34	0	0
ASV1563	Bacteria	Bacteroidota	Bacteroidia	Sphingobacteriales	Sphingobacteriaceae	Pedobacter	NA	0.999972	0	84	0	0	0	0	27	28	0	0	0	0	16	0	0	0	36	50	0	0	36	19	0	18	34	0	119	0	0	43	36	0	0	77	0	0	0	28	25	0	0
ASV238	Bacteria	Bacteroidota	Bacteroidia	Sphingobacteriales	Sphingobacteriaceae	Pedobacter	NA	0.999914	23	26	0	0	0	0	27	13	24	0	0	0	14	0	0	31	27	35	0	26	28	0	0	18	0	0	0	18	0	16	27	0	39	14	61	25	0	21	9	0	0
ASV1674	Bacteria	Bacteroidota	Bacteroidia	Sphingobacteriales	Sphingobacteriaceae	Pedobacter	NA	0.999548	0	26	0	7	17	0	14	10	16	0	0	7	29	0	0	0	13	11	0	14	0	26	11	0	0	0	0	7	17	22	0	0	0	0	26	0	9	26	33	0	17
ASV7426	Bacteria	Bacteroidota	Bacteroidia	Sphingobacteriales	Sphingobacteriaceae	Pedobacter	NA	0.999845	0	0	0	0	0	0	0	11	0	0	0	0	0	0	14	8	40	0	0	22	0	0	0	61	0	0	0	13	0	0	0	0	0	31	45	0	0	0	0	0	0
ASV6337	Bacteria	Bacteroidota	Bacteroidia	Sphingobacteriales	Sphingobacteriaceae	Pedobacter	NA	0.999904	0	0	0	0	0	42	0	0	0	0	0	0	0	0	0	0	0	0	0	26	0	0	0	0	0	0	0	17	0	0	0	0	0	28	0	0	0	0	0	0	0
ASV378	Bacteria	Bacteroidota	Bacteroidia	Sphingobacteriales	Sphingobacteriaceae	Pedobacter	NA	0.999895	18	0	0	0	0	17	17	11	20	0	0	0	0	0	0	30	37	0	0	15	23	0	0	14	0	0	0	14	0	29	22	0	25	22	40	27	0	0	19	14	0
ASV2243	Bacteria	Bacteroidota	Bacteroidia	Sphingobacteriales	Sphingobacteriaceae	NA	NA	1	0	9	10	18	0	0	0	0	0	8	0	20	0	8	10	0	0	0	0	0	0	9	0	0	17	14	32	0	9	0	0	14	0	0	7	0	0	0	0	0	8
ASV3315	Bacteria	Bacteroidota	Bacteroidia	Sphingobacteriales	Sphingobacteriaceae	norank_f__Sphingobacteriaceae	Pedobacter_sp._WM30-14	0.769315	0	0	21	41	22	0	0	0	0	25	0	26	0	26	15	0	0	0	27	0	0	36	24	0	35	16	0	0	0	0	0	36	0	0	0	0	0	0	0	0	18
ASV4019	Bacteria	Bacteroidota	Bacteroidia	Sphingobacteriales	Sphingobacteriaceae	Pedobacter	NA	0.999651	0	0	7	0	49	0	0	0	0	0	12	0	0	18	24	0	0	0	8	0	0	28	0	0	0	0	0	0	0	0	0	0	0	0	0	0	0	0	0	0	66
ASV4620	Bacteria	Bacteroidota	Bacteroidia	Sphingobacteriales	Sphingobacteriaceae	Pedobacter	NA	0.999836	0	0	0	47	0	0	0	0	0	34	0	0	0	0	0	0	0	0	0	0	0	0	116	0	0	0	0	0	0	0	0	35	0	0	0	0	0	0	0	0	190
ASV1580	Bacteria	Bacteroidota	Bacteroidia	Flavobacteriales	Weeksellaceae	Chryseobacterium	NA	0.999995	0	51	2	7	33	31	26	26	4	13	2	3	7	40	10	4	94	5	0	23	5	54	36	0	617	5	51	0	0	18	12	47	12	195	29	12	0	39	7	0	31
ASV502	Bacteria	Bacteroidota	Bacteroidia	Flavobacteriales	Flavobacteriaceae	Flavobacterium	Flavobacterium_terrigena	0.761563	14	0	0	0	0	17	11	6	0	0	0	0	0	0	0	40	9	12	0	48	9	0	0	8	0	0	0	0	0	8	17	0	72	0	0	4	0	0	18	12	0
ASV6477	Bacteria	Bacteroidota	Bacteroidia	Flavobacteriales	Flavobacteriaceae	Flavobacterium	NA	0.999763	0	0	0	0	0	9	0	7	0	0	0	0	0	0	0	16	7	17	0	25	0	0	0	0	26	0	0	0	16	10	0	0	9	0	0	0	0	0	0	0	0
ASV450	Bacteria	Bacteroidota	Bacteroidia	Flavobacteriales	Flavobacteriaceae	Flavobacterium	Flavobacterium_resistens	0.71654	16	0	0	0	0	25	14	10	0	0	0	0	0	0	0	7	8	9	0	45	7	0	0	0	0	0	0	0	33	0	23	0	48	0	0	21	0	0	0	0	0
ASV477	Bacteria	Bacteroidota	Bacteroidia	Flavobacteriales	Flavobacteriaceae	Flavobacterium	NA	0.999807	15	220	0	0	0	224	144	31	0	0	0	0	0	0	0	0	0	21	0	45	207	0	0	0	0	0	0	0	52	228	0	0	0	0	0	0	15	54	83	0	0
ASV6330	Bacteria	Bacteroidota	Bacteroidia	Flavobacteriales	Flavobacteriaceae	Flavobacterium	NA	0.999918	0	0	0	0	0	152	0	0	0	0	0	0	0	0	0	0	0	0	0	0	145	0	0	0	0	0	0	0	0	156	0	0	0	0	0	0	0	0	0	0	0
ASV5550	Bacteria	Bacteroidota	Bacteroidia	Flavobacteriales	Flavobacteriaceae	Flavobacterium	NA	0.999954	0	0	0	0	36	0	0	0	0	0	0	0	0	18	0	0	0	0	0	0	0	0	26	0	0	0	0	0	0	10	0	0	0	0	0	0	0	0	0	0	18
ASV1229	Bacteria	Bacteroidota	Bacteroidia	Flavobacteriales	Flavobacteriaceae	Flavobacterium	NA	0.999972	5	0	0	0	0	10	0	31	0	0	0	0	0	0	0	19	7	33	0	0	0	0	0	0	0	6	0	0	0	0	14	10	0	18	0	6	0	0	0	0	0
ASV384	Bacteria	Bacteroidota	Bacteroidia	Flavobacteriales	Flavobacteriaceae	Flavobacterium	NA	0.999959	18	0	0	0	7	0	0	0	0	0	0	0	0	0	0	0	9	0	0	0	0	0	0	0	0	0	0	0	0	0	14	0	28	33	0	0	0	0	0	0	0
ASV83	Bacteria	Bacteroidota	Bacteroidia	Flavobacteriales	Flavobacteriaceae	Flavobacterium	NA	0.999979	36	0	0	28	0	0	0	0	23	0	0	15	0	0	0	21	13	0	0	0	0	23	21	0	5	0	0	0	0	0	0	0	7	0	6	16	0	0	0	0	38
ASV17	Bacteria	Bacteroidota	Bacteroidia	Flavobacteriales	Flavobacteriaceae	Flavobacterium	NA	0.999849	84	165	0	0	0	0	0	17	0	0	0	0	0	0	0	0	27	14	0	9	0	0	0	0	0	0	0	0	13	0	0	0	108	0	0	0	0	0	20	0	0
ASV335	Bacteria	Bacteroidota	Bacteroidia	Flavobacteriales	Flavobacteriaceae	Flavobacterium	NA	0.999961	19	85	0	9	0	31	263	39	104	0	0	7	26	0	0	67	169	46	3	37	56	0	6	0	0	0	0	0	25	71	28	0	0	160	0	0	84	69	38	43	0
ASV886	Bacteria	Bacteroidota	Bacteroidia	Flavobacteriales	Flavobacteriaceae	Flavobacterium	NA	0.999932	8	8	0	17	0	0	8	16	12	0	0	0	22	0	0	0	32	5	0	0	7	0	18	0	0	0	0	0	25	11	0	0	42	0	0	7	0	42	0	10	0
ASV6686	Bacteria	Bacteroidota	Bacteroidia	Flavobacteriales	Flavobacteriaceae	Flavobacterium	NA	0.999867	0	0	0	0	0	0	19	0	12	0	0	0	0	0	0	16	7	0	0	0	10	0	0	13	0	0	0	15	0	18	18	0	12	0	14	11	15	0	0	10	0
ASV214	Bacteria	Bacteroidota	Bacteroidia	Flavobacteriales	Flavobacteriaceae	Flavobacterium	NA	0.999937	24	0	0	0	0	0	0	18	30	0	0	0	24	12	0	53	0	27	5	23	0	0	0	0	0	0	3	34	27	23	39	0	29	0	14	23	0	22	0	25	0
ASV494	Bacteria	Bacteroidota	Bacteroidia	Flavobacteriales	Flavobacteriaceae	Flavobacterium	NA	0.999836	15	25	0	0	0	28	29	0	0	0	0	0	0	0	0	13	26	0	0	36	18	0	0	18	0	0	0	0	0	28	0	0	37	0	23	0	0	0	0	0	0
ASV6341	Bacteria	Bacteroidota	Bacteroidia	Flavobacteriales	Flavobacteriaceae	Flavobacterium	NA	0.999979	0	0	0	0	0	37	15	38	37	0	0	0	23	0	0	0	0	37	0	60	29	0	0	0	0	0	0	0	29	52	0	0	70	0	0	57	31	0	22	0	0
ASV71	Bacteria	Bacteroidota	Bacteroidia	Flavobacteriales	Flavobacteriaceae	Flavobacterium	NA	0.999999	39	59	0	0	0	0	0	0	57	0	0	0	17	0	0	38	72	0	0	0	0	0	0	59	0	0	0	42	0	0	47	0	0	109	201	38	0	37	0	29	0
ASV8198	Bacteria	Bacteroidota	Bacteroidia	Flavobacteriales	Flavobacteriaceae	Flavobacterium	NA	0.99995	0	0	0	0	0	0	0	0	0	8	0	0	0	0	0	0	0	0	0	0	20	0	10	0	0	0	0	0	0	0	0	0	0	0	0	0	0	11	0	0	0
ASV520	Bacteria	Bacteroidota	Bacteroidia	Flavobacteriales	Flavobacteriaceae	Flavobacterium	NA	0.999874	14	23	0	0	0	0	53	42	26	0	0	0	21	0	0	29	35	16	0	13	37	0	0	63	0	0	0	91	0	63	42	0	47	0	250	170	8	23	68	0	0
ASV113	Bacteria	Bacteroidota	Bacteroidia	Flavobacteriales	Flavobacteriaceae	Flavobacterium	Flavobacterium_commune	0.838977	31	0	0	0	0	0	0	0	6	0	0	0	0	0	0	21	43	0	0	0	0	0	0	6	0	0	0	0	0	0	6	0	21	37	12	0	0	14	0	7	0
ASV916	Bacteria	Bacteroidota	Bacteroidia	Flavobacteriales	Flavobacteriaceae	Flavobacterium	NA	0.999935	8	0	0	0	0	0	21	15	15	0	0	0	0	0	0	17	16	12	0	17	0	0	0	6	0	0	0	16	0	0	0	0	0	20	0	12	23	0	20	10	0
ASV2352	Bacteria	Bacteroidota	Bacteroidia	Flavobacteriales	Flavobacteriaceae	Flavobacterium	NA	1	0	7	8	0	6	0	18	8	16	0	0	0	16	0	0	23	8	10	0	5	16	0	0	0	0	0	0	0	10	16	15	0	0	0	0	0	13	7	0	5	5
ASV1163	Bacteria	Bacteroidota	Bacteroidia	Flavobacteriales	Flavobacteriaceae	Flavobacterium	NA	0.999764	5	5	0	0	8	4	0	22	3	0	0	4	8	2	0	6	13	0	2	9	23	2	0	28	5	8	6	24	0	11	6	0	0	17	68	6	9	14	32	2	8
ASV606	Bacteria	Bacteroidota	Bacteroidia	Flavobacteriales	Flavobacteriaceae	Flavobacterium	Flavobacterium_hauense	0.733499	12	18	8	0	0	17	14	26	8	0	0	0	8	10	0	11	12	12	0	10	17	0	0	27	5	0	0	12	10	31	0	0	13	0	36	16	12	20	16	6	0
ASV1672	Bacteria	Bacteroidota	Bacteroidia	Flavobacteriales	Flavobacteriaceae	Flavobacterium	NA	0.998787	0	26	0	0	0	4	10	17	0	0	0	0	0	0	0	6	19	5	0	14	16	0	0	16	0	0	7	25	0	0	2	0	8	0	16	0	10	69	15	4	0
ASV445	Bacteria	Bacteroidota	Bacteroidia	Sphingobacteriales	env.OPS_17	norank_f__env.OPS_17	NA	1	16	22	0	0	0	13	15	10	0	0	0	0	0	0	0	29	0	23	0	33	27	0	0	0	0	0	0	0	22	15	13	0	22	0	0	13	15	13	13	0	0
ASV7789	Bacteria	Bacteroidota	Bacteroidia	Sphingobacteriales	env.OPS_17	norank_f__env.OPS_17	NA	1	0	0	0	0	0	0	0	0	8	0	0	0	0	0	0	0	17	0	0	0	0	0	0	18	0	0	0	7	0	0	0	0	0	8	0	0	23	14	0	0	0
ASV5009	Bacteria	Bacteroidota	Bacteroidia	Sphingobacteriales	env.OPS_17	norank_f__env.OPS_17	NA	1	0	0	0	9	0	0	0	0	0	13	0	7	0	18	8	0	0	0	0	0	0	0	0	0	7	14	6	0	0	0	0	9	0	0	0	0	0	0	0	0	0
ASV4733	Bacteria	Bacteroidota	Bacteroidia	Sphingobacteriales	env.OPS_17	norank_f__env.OPS_17	NA	1	0	0	0	18	0	0	0	0	0	30	0	0	0	0	0	0	0	0	0	0	0	20	0	0	0	0	0	0	0	0	0	22	0	0	0	0	0	0	0	0	0
ASV600	Bacteria	Bacteroidota	Bacteroidia	Sphingobacteriales	env.OPS_17	norank_f__env.OPS_17	uncultured_Bacteroidetes_bacterium_g__norank_f__env.OPS_17	0.762251	12	17	0	0	0	0	0	0	5	0	19	0	0	0	0	14	12	12	0	23	20	0	9	32	0	19	0	23	8	29	29	0	9	0	9	6	9	11	0	0	0
ASV1742	Bacteria	Bacteroidota	Bacteroidia	Sphingobacteriales	env.OPS_17	norank_f__env.OPS_17	NA	1	0	22	0	0	0	15	0	13	21	0	0	0	16	0	0	0	0	0	0	30	0	0	0	0	0	0	0	22	0	0	18	0	0	0	0	24	0	0	33	0	0
ASV10823	Bacteria	Bacteroidota	Bacteroidia	Sphingobacteriales	env.OPS_17	norank_f__env.OPS_17	NA	1	0	0	0	0	0	0	0	0	0	0	0	0	0	0	0	0	13	0	0	0	0	0	0	0	0	0	0	0	0	0	0	0	0	0	53	0	24	0	0	0	0
ASV806	Bacteria	Bacteroidota	Bacteroidia	Sphingobacteriales	env.OPS_17	norank_f__env.OPS_17	NA	1	9	26	0	0	0	4	0	0	17	0	0	0	0	0	0	8	11	0	0	26	38	0	0	23	0	0	0	21	3	14	12	0	8	0	0	11	19	18	0	0	0
ASV1124	Bacteria	Bacteroidota	Bacteroidia	Sphingobacteriales	env.OPS_17	norank_f__env.OPS_17	NA	0.999997	5	7	0	0	0	0	0	4	6	0	0	0	4	0	0	4	8	7	0	4	8	0	0	9	0	0	0	9	5	9	10	0	17	0	5	8	11	8	0	6	0
ASV867	Bacteria	Bacteroidota	Bacteroidia	Sphingobacteriales	AKYH767	norank_f__AKYH767	uncultured_bacterium_g__norank_f__AKYH767	0.959569	8	13	0	0	0	0	18	7	0	0	0	0	0	0	0	13	13	10	0	10	14	0	0	0	0	0	0	0	0	25	7	0	9	0	0	13	0	0	20	0	0
ASV516	Bacteria	Bacteroidota	Bacteroidia	Cytophagales	Spirosomaceae	Dyadobacter	Dyadobacter_fermentans	0.715942	14	0	0	0	12	0	6	0	0	0	0	8	0	8	0	9	15	7	0	0	0	11	9	20	8	0	0	0	0	0	0	0	9	0	0	0	0	0	0	0	10
ASV448	Bacteria	Bacteroidota	Bacteroidia	Cytophagales	Microscillaceae	norank_f__Microscillaceae	NA	0.998892	16	0	7	12	8	0	11	0	12	5	10	9	0	26	0	18	6	10	9	14	9	12	0	0	7	7	0	8	13	10	13	18	0	0	0	0	15	5	11	8	14
ASV710	Bacteria	Bacteroidota	Bacteroidia	Cytophagales	Microscillaceae	norank_f__Microscillaceae	NA	0.999695	10	17	0	0	0	9	24	9	16	0	0	0	14	0	0	18	10	13	0	16	16	0	0	10	0	0	0	16	21	8	11	0	14	11	0	12	13	12	21	21	0
ASV785	Bacteria	Bacteroidota	Bacteroidia	Cytophagales	Microscillaceae	norank_f__Microscillaceae	uncultured_prokaryote_g__norank_f__Microscillaceae	0.920785	9	20	0	0	0	6	10	4	0	0	0	0	0	0	0	11	9	9	0	17	12	0	0	5	0	0	0	16	11	16	9	0	16	0	24	30	8	8	11	0	0
ASV367	Bacteria	Bacteroidota	Bacteroidia	Cytophagales	Microscillaceae	OLB12	uncultured_bacterium_g__OLB12	0.984989	18	17	0	0	0	0	10	0	0	0	0	0	7	0	0	15	10	11	0	22	14	0	0	0	0	0	0	42	0	12	11	0	30	14	20	28	8	0	18	10	0
ASV365	Bacteria	Bacteroidota	Bacteroidia	Cytophagales	Microscillaceae	norank_f__Microscillaceae	NA	0.884866	18	30	0	0	0	0	27	14	10	0	0	0	0	0	0	0	29	19	0	18	0	0	0	0	0	0	0	0	22	10	0	0	39	0	0	0	0	0	19	15	0
ASV6392	Bacteria	Bacteroidota	Bacteroidia	Cytophagales	Microscillaceae	NA	NA	0.999939	0	0	0	0	0	19	0	0	0	0	0	0	10	0	0	23	0	0	0	0	16	0	0	15	0	0	0	15	0	0	24	0	0	36	0	9	31	19	0	0	0
ASV3573	Bacteria	Bacteroidota	Bacteroidia	Cytophagales	Microscillaceae	norank_f__Microscillaceae	NA	0.956339	0	0	14	0	9	0	42	0	0	0	0	0	9	36	0	32	0	0	0	0	25	0	7	34	12	0	0	43	0	29	0	29	0	0	37	39	21	0	0	0	0
ASV410	Bacteria	Bacteroidota	Bacteroidia	Cytophagales	Microscillaceae	norank_f__Microscillaceae	NA	0.913782	17	48	0	0	0	32	0	0	0	0	0	0	0	0	0	0	23	32	0	49	0	0	0	0	0	0	0	34	37	0	33	0	40	11	0	0	17	0	47	17	0
ASV1791	Bacteria	Bacteroidota	Bacteroidia	Cytophagales	Microscillaceae	norank_f__Microscillaceae	NA	0.87414	0	19	0	0	0	0	18	24	0	0	0	0	0	0	0	13	13	16	0	12	19	0	0	0	0	0	0	22	14	0	15	0	17	0	0	17	21	0	0	26	0
ASV1919	Bacteria	Bacteroidota	Bacteroidia	Cytophagales	Microscillaceae	norank_f__Microscillaceae	NA	0.979264	0	15	0	0	0	12	20	14	0	0	0	0	9	0	0	24	17	17	0	14	12	0	0	0	0	0	0	16	18	15	9	0	13	15	0	10	19	13	18	22	0
ASV684	Bacteria	Bacteroidota	Bacteroidia	Cytophagales	Microscillaceae	norank_f__Microscillaceae	NA	0.939043	11	0	0	0	0	0	14	0	19	0	0	0	0	0	0	0	15	0	0	14	18	0	0	0	0	0	0	9	18	0	0	0	15	0	0	0	0	0	12	0	0
ASV1959	Bacteria	Bacteroidota	Bacteroidia	Cytophagales	Microscillaceae	norank_f__Microscillaceae	NA	0.996471	0	14	0	0	0	0	0	0	0	0	0	0	0	0	0	0	0	11	0	18	0	0	0	0	0	0	0	0	17	0	0	0	16	0	0	0	12	0	15	0	0
ASV4071	Bacteria	Bacteroidota	Bacteroidia	Cytophagales	Microscillaceae	norank_f__Microscillaceae	NA	0.997951	0	0	7	0	0	18	19	0	0	0	0	0	0	14	0	0	0	0	0	13	19	0	0	0	0	0	0	0	15	16	0	9	0	0	0	9	0	27	12	0	15
ASV7370	Bacteria	Bacteroidota	Bacteroidia	Cytophagales	Microscillaceae	norank_f__Microscillaceae	NA	0.997867	0	0	0	0	0	0	0	28	26	0	9	0	0	0	0	18	14	12	0	15	0	0	0	0	0	0	0	0	22	0	30	0	17	0	0	0	16	0	25	0	0
ASV388	Bacteria	Bacteroidota	Bacteroidia	Cytophagales	Microscillaceae	norank_f__Microscillaceae	NA	0.994375	18	0	0	0	0	0	12	0	0	0	0	0	0	0	0	0	5	0	0	0	22	0	0	0	0	0	0	13	0	17	0	0	0	0	0	19	0	0	0	0	0
ASV1862	Bacteria	Bacteroidota	Bacteroidia	Cytophagales	Microscillaceae	norank_f__Microscillaceae	NA	0.989769	0	17	0	0	0	0	10	0	0	0	0	0	28	0	0	13	23	0	0	21	9	0	0	32	0	0	0	80	19	0	26	0	11	0	49	46	0	0	0	0	0
ASV803	Bacteria	Bacteroidota	Bacteroidia	Cytophagales	Microscillaceae	NA	NA	0.999994	9	11	0	0	0	28	37	19	14	0	0	0	0	0	0	11	22	21	0	29	18	0	0	6	0	0	0	15	23	25	21	0	33	0	4	9	12	8	23	9	0
ASV267	Bacteria	Bacteroidota	Bacteroidia	Cytophagales	Microscillaceae	norank_f__Microscillaceae	uncultured_Flexibacteraceae_bacterium_g__norank_f__Microscillaceae	0.954135	22	11	0	0	0	0	4	0	12	0	0	0	3	0	0	13	25	0	0	5	10	0	0	27	0	0	0	50	7	28	0	0	8	19	13	11	0	9	21	9	0
ASV2209	Bacteria	Bacteroidota	Bacteroidia	Cytophagales	Microscillaceae	norank_f__Microscillaceae	NA	0.951922	0	9	0	0	0	8	10	0	18	0	0	0	0	0	0	12	5	10	0	12	13	0	0	0	0	0	0	32	16	5	7	0	0	10	6	0	15	11	14	10	0
ASV3354	Bacteria	Bacteroidota	Bacteroidia	Cytophagales	Microscillaceae	norank_f__Microscillaceae	NA	0.865421	0	0	19	16	0	0	0	0	0	0	0	6	0	35	9	0	0	0	33	0	9	17	0	14	14	9	17	15	0	0	10	0	0	0	0	0	0	0	0	0	14
ASV1766	Bacteria	Bacteroidota	Bacteroidia	Cytophagales	Microscillaceae	norank_f__Microscillaceae	NA	0.705901	0	20	13	0	16	25	39	31	31	8	0	13	0	20	11	0	0	21	12	30	18	0	0	20	13	0	5	64	29	26	24	8	23	0	0	0	0	0	28	24	13
ASV465	Bacteria	Bacteroidota	Bacteroidia	Cytophagales	Microscillaceae	norank_f__Microscillaceae	NA	0.740668	15	0	0	0	0	30	0	0	0	0	0	0	0	0	0	30	26	24	0	25	19	0	0	0	0	0	0	24	31	0	0	0	19	16	36	23	27	34	0	0	0
ASV6648	Bacteria	Bacteroidota	Bacteroidia	Cytophagales	Microscillaceae	norank_f__Microscillaceae	NA	0.878156	0	0	0	0	0	0	28	20	9	0	0	0	0	0	0	0	0	11	0	0	0	0	0	0	0	0	0	22	18	15	17	0	17	0	0	0	14	0	16	18	0
ASV3418	Bacteria	Bacteroidota	Bacteroidia	Cytophagales	Microscillaceae	norank_f__Microscillaceae	NA	0.867415	0	0	18	22	29	0	0	0	0	9	26	0	0	55	15	0	0	0	19	0	0	13	17	0	0	0	15	0	0	0	0	24	0	0	0	0	0	0	0	0	19
ASV1930	Bacteria	Bacteroidota	Bacteroidia	Cytophagales	Microscillaceae	norank_f__Microscillaceae	NA	0.901606	0	15	0	0	0	0	0	0	0	0	0	7	0	0	0	0	0	0	11	25	0	0	0	0	0	24	0	0	0	0	0	10	0	0	0	0	0	0	0	0	0
ASV4841	Bacteria	Bacteroidota	Bacteroidia	Cytophagales	Microscillaceae	norank_f__Microscillaceae	uncultured_Ohtaekwangia_sp.	0.751146	0	0	0	13	12	0	0	0	0	8	0	12	0	10	0	0	0	0	0	0	0	9	10	13	0	0	12	11	0	0	0	8	0	0	0	0	0	0	0	0	19
ASV807	Bacteria	Bacteroidota	Bacteroidia	Cytophagales	Microscillaceae	norank_f__Microscillaceae	uncultured_Ohtaekwangia_sp.	0.859317	9	19	24	0	0	40	39	13	35	0	0	0	10	0	0	26	20	15	0	16	31	0	0	13	0	0	0	33	43	16	23	0	24	41	16	5	22	27	26	15	0
ASV6453	Bacteria	Bacteroidota	Bacteroidia	Cytophagales	Microscillaceae	Chryseolinea	uncultured_bacterium_g__Chryseolinea	0.745114	0	0	0	0	0	11	21	11	0	0	0	0	0	0	0	23	0	18	0	12	0	0	0	0	0	0	0	0	12	8	0	0	20	13	0	0	0	10	13	0	0
ASV3142	Bacteria	Bacteroidota	Bacteroidia	Cytophagales	Microscillaceae	Chryseolinea	uncultured_bacterium_g__Chryseolinea	0.834975	0	0	31	0	13	0	0	0	0	0	0	0	0	36	0	0	0	0	32	0	0	0	7	0	0	15	0	19	0	0	0	0	0	0	0	0	0	0	0	0	12
ASV220	Bacteria	Bacteroidota	Bacteroidia	Cytophagales	Microscillaceae	Chryseolinea	uncultured_bacterium_g__Chryseolinea	0.767208	24	51	0	10	0	50	78	19	33	7	0	0	17	0	0	41	46	43	0	46	49	0	0	51	0	0	0	61	76	41	35	0	47	47	0	25	65	30	43	54	0
ASV2061	Bacteria	Bacteroidota	Bacteroidia	Cytophagales	Microscillaceae	Chryseolinea	NA	0.913369	0	12	12	0	0	0	21	0	13	0	0	0	0	0	0	11	0	0	0	14	0	0	0	0	11	0	0	0	16	12	0	0	0	10	9	13	10	0	0	0	0
ASV1938	Bacteria	Bacteroidota	Bacteroidia	Cytophagales	Microscillaceae	Chryseolinea	NA	0.884434	0	15	0	9	0	29	27	11	15	0	0	0	0	0	0	14	20	18	0	31	19	0	0	0	0	0	0	21	33	26	18	0	33	0	0	15	18	15	24	16	0
ASV1872	Bacteria	Bacteroidota	Bacteroidia	Cytophagales	Microscillaceae	Ohtaekwangia	metagenome_g__Ohtaekwangia	0.851375	0	16	0	0	0	0	18	0	0	0	0	0	9	8	0	7	12	0	0	22	16	0	0	0	0	0	0	15	24	15	12	0	17	0	0	9	10	0	15	0	0
ASV1713	Bacteria	Bacteroidota	Bacteroidia	Cytophagales	Microscillaceae	Ohtaekwangia	NA	0.875669	0	24	0	0	0	0	19	25	0	0	0	0	13	0	0	0	38	0	0	31	0	0	0	0	0	0	0	0	25	0	19	0	36	0	28	21	0	30	0	0	0
ASV564	Bacteria	Bacteroidota	Bacteroidia	Cytophagales	Microscillaceae	Ohtaekwangia	NA	0.878042	13	40	0	0	0	26	50	23	26	0	0	0	0	17	4	27	0	18	24	41	68	0	0	12	0	4	0	38	49	44	24	4	61	0	0	0	32	0	55	6	0
ASV2040	Bacteria	Bacteroidota	Bacteroidia	Cytophagales	Microscillaceae	Ohtaekwangia	uncultured_bacterium_g__Ohtaekwangia	0.814508	0	12	0	0	0	11	11	0	0	0	0	0	0	0	0	7	0	14	0	16	0	0	0	0	0	0	0	16	14	15	10	0	14	0	0	0	18	0	21	10	0
ASV757	Bacteria	Bacteroidota	Bacteroidia	Cytophagales	Microscillaceae	Ohtaekwangia	uncultured_bacterium_g__Ohtaekwangia	0.758911	10	35	0	0	0	19	54	25	0	0	0	0	4	7	0	22	20	11	9	22	23	0	0	11	0	0	0	0	34	31	18	0	28	0	14	14	25	18	20	0	0
ASV604	Bacteria	Bacteroidota	Bacteroidia	Cytophagales	Microscillaceae	Ohtaekwangia	uncultured_bacterium_g__Ohtaekwangia	0.715929	12	14	8	0	0	0	18	0	20	0	0	0	10	0	0	21	12	14	0	18	24	0	11	0	0	0	0	24	21	20	25	0	24	0	11	17	13	0	12	7	0
ASV899	Bacteria	Bacteroidota	Bacteroidia	Cytophagales	Microscillaceae	Ohtaekwangia	NA	0.910376	8	27	0	0	0	17	11	16	5	0	0	0	0	4	0	22	23	13	0	10	16	0	0	6	0	0	0	31	28	18	6	0	26	0	7	9	8	9	15	6	0
ASV4703	Bacteria	Bacteroidota	Bacteroidia	Cytophagales	Microscillaceae	norank_f__Microscillaceae	uncultured_soil_bacterium_g__norank_f__Microscillaceae	0.723516	0	0	0	21	0	0	0	0	0	0	0	12	0	0	0	0	0	0	0	0	0	8	0	0	0	0	0	0	0	0	0	29	0	0	0	0	0	0	0	0	0
ASV4066	Bacteria	Bacteroidota	Bacteroidia	Cytophagales	Microscillaceae	norank_f__Microscillaceae	NA	0.993396	0	0	7	0	9	0	0	0	0	13	0	0	0	14	13	0	0	0	12	0	0	9	0	0	0	0	7	0	0	0	0	14	0	0	0	0	0	0	0	0	15
ASV196	Bacteria	Bacteroidota	Bacteroidia	Cytophagales	Microscillaceae	norank_f__Microscillaceae	NA	0.998875	25	45	35	59	36	23	45	25	36	32	22	65	18	93	38	48	55	26	26	29	51	46	16	68	41	35	52	106	34	35	54	64	44	71	50	30	40	57	49	15	46
ASV740	Bacteria	Bacteroidota	Bacteroidia	Cytophagales	Microscillaceae	Ohtaekwangia	uncultured_bacterium_g__Ohtaekwangia	0.748328	10	16	0	0	0	0	13	0	17	0	0	0	10	0	0	16	23	0	0	0	11	0	0	12	0	0	0	28	13	0	21	0	12	15	23	9	0	19	20	18	0
ASV2221	Bacteria	Bacteroidota	Bacteroidia	Cytophagales	Microscillaceae	Ohtaekwangia	uncultured_bacterium_g__Ohtaekwangia	0.700918	0	9	8	0	13	31	19	27	16	0	0	17	11	14	12	14	13	24	0	27	17	7	0	14	0	0	0	77	25	32	19	0	18	12	33	26	24	9	38	0	6
ASV784	Bacteria	Bacteroidota	Bacteroidia	Cytophagales	Microscillaceae	Ohtaekwangia	uncultured_Bacteroidetes_bacterium_g__Ohtaekwangia	0.713903	9	15	0	0	0	0	31	0	12	0	0	11	0	0	12	19	24	5	0	7	10	12	0	14	0	0	0	20	0	14	13	0	7	0	0	5	20	5	0	9	0
ASV3851	Bacteria	Bacteroidota	Bacteroidia	Cytophagales	Microscillaceae	Ohtaekwangia	NA	0.989583	0	0	9	6	11	13	9	7	0	0	0	6	0	11	9	11	4	11	10	6	9	16	0	0	0	0	0	18	11	0	14	0	0	0	0	11	0	0	0	6	0
ASV4996	Bacteria	Bacteroidota	Bacteroidia	Cytophagales	Microscillaceae	Ohtaekwangia	uncultured_bacterium_g__Ohtaekwangia	0.707695	0	0	0	9	0	0	0	0	9	13	0	0	11	10	0	7	6	7	16	0	0	8	0	9	0	0	0	30	0	0	11	0	0	6	22	7	0	0	0	0	11
ASV8	Bacteria	Bacteroidota	Bacteroidia	Cytophagales	Cyclobacteriaceae	Algoriphagus	NA	0.999826	117	278	0	0	0	69	94	64	40	0	0	0	38	0	0	55	158	68	0	94	270	0	0	54	0	0	0	28	35	230	83	0	91	98	114	126	33	146	50	11	0
ASV135	Bacteria	Bacteroidota	Bacteroidia	Cytophagales	Cyclobacteriaceae	Algoriphagus	NA	0.999086	29	30	0	0	0	18	31	42	21	0	0	0	0	0	0	45	47	22	0	41	52	0	0	14	0	0	0	20	24	65	25	0	21	63	15	17	22	48	21	0	0
ASV1772	Bacteria	Bacteroidota	Bacteroidia	Cytophagales	Cyclobacteriaceae	Algoriphagus	NA	0.997403	0	20	0	0	0	0	0	0	0	0	0	0	0	0	0	24	29	0	0	26	0	0	0	10	0	0	0	15	0	0	11	0	0	0	0	11	0	0	0	13	0
ASV2648	Bacteria	Bacteroidota	Bacteroidia	Cytophagales	Cytophagaceae	Rhodocytophaga	uncultured_Rhodocytophaga_sp.	0.921568	0	4	0	11	10	0	2	5	0	10	7	20	0	17	4	0	0	0	0	0	11	13	0	12	8	10	6	7	0	0	3	6	0	0	0	0	0	7	5	0	18
ASV78	Bacteria	Bacteroidota	Bacteroidia	Cytophagales	Hymenobacteraceae	Adhaeribacter	NA	0.999997	38	30	22	14	34	0	20	22	37	27	12	21	21	43	21	31	47	28	17	42	27	10	26	36	48	17	39	35	30	57	25	27	24	32	83	22	29	41	23	15	56
ASV3743	Bacteria	Bacteroidota	Bacteroidia	Cytophagales	Hymenobacteraceae	Adhaeribacter	NA	0.999994	0	0	11	0	18	0	0	0	0	0	0	0	0	0	0	0	0	0	18	0	0	25	0	0	0	16	0	0	0	0	0	0	0	0	0	0	0	0	0	0	20
ASV1065	Bacteria	Bacteroidota	Bacteroidia	Cytophagales	Hymenobacteraceae	Adhaeribacter	uncultured_soil_bacterium_g__Adhaeribacter	0.786306	6	12	0	0	0	22	20	18	15	9	0	0	14	11	4	23	0	13	0	25	14	0	0	24	0	0	0	21	17	12	14	0	16	19	13	8	25	10	10	9	0
ASV3110	Bacteria	Bacteroidota	Bacteroidia	Cytophagales	Hymenobacteraceae	Adhaeribacter	NA	0.999785	0	0	33	0	18	0	0	0	0	30	23	0	0	15	14	0	0	0	13	0	0	0	20	0	23	0	26	0	0	0	0	21	0	0	0	0	0	0	0	0	18
ASV3269	Bacteria	Bacteroidota	Bacteroidia	Cytophagales	Hymenobacteraceae	Adhaeribacter	NA	0.999951	0	0	23	24	25	0	0	0	0	0	0	34	0	24	0	0	0	0	0	0	0	27	20	29	59	28	40	18	0	0	0	0	0	0	22	8	19	0	15	9	51
ASV3982	Bacteria	Bacteroidota	Bacteroidia	Cytophagales	Hymenobacteraceae	Adhaeribacter	NA	0.99974	0	0	8	8	12	0	0	0	0	20	0	0	0	19	0	0	0	0	0	0	0	13	0	0	18	0	21	0	0	16	0	12	0	0	0	0	0	0	0	0	30
ASV572	Bacteria	Bacteroidota	Bacteroidia	Cytophagales	Hymenobacteraceae	Adhaeribacter	NA	0.999443	13	0	0	0	0	0	0	0	0	12	0	0	0	16	0	0	0	0	0	0	19	0	17	14	0	0	12	15	6	0	0	0	0	0	0	0	10	19	0	0	0
ASV506	Bacteria	Bacteroidota	Bacteroidia	Cytophagales	Hymenobacteraceae	Adhaeribacter	NA	0.999989	14	14	56	47	40	0	11	13	8	45	23	77	8	43	7	9	12	5	31	13	9	24	15	24	85	38	27	21	5	9	8	16	5	12	12	9	19	17	11	6	51
ASV1273	Bacteria	Bacteroidota	Bacteroidia	Cytophagales	Hymenobacteraceae	Pontibacter	uncultured_Pontibacter_sp.	0.792051	4	7	0	0	0	0	9	12	10	0	0	0	5	0	0	0	8	9	0	5	8	0	0	32	0	0	0	28	13	17	12	0	3	29	48	0	14	13	7	0	0
ASV3635	Bacteria	Bacteroidota	Bacteroidia	Cytophagales	Hymenobacteraceae	Pontibacter	Pontibacter_sp._LX8	0.880378	0	0	13	16	18	0	0	0	0	0	0	18	0	25	0	0	0	0	16	0	0	0	0	0	15	13	0	0	0	0	0	0	0	0	0	0	0	0	0	0	17
ASV3558	Bacteria	Bacteroidota	Bacteroidia	Cytophagales	Hymenobacteraceae	Pontibacter	NA	0.999995	0	0	14	20	26	0	0	0	0	22	11	20	0	22	19	0	0	0	15	0	0	25	16	0	0	0	13	0	0	0	0	0	0	0	0	0	0	0	0	0	23
ASV1016	Bacteria	Bacteroidota	Bacteroidia	Cytophagales	Hymenobacteraceae	Pontibacter	Pontibacter_populi	0.820329	7	0	0	0	0	11	23	21	25	0	0	0	24	0	0	21	0	14	0	11	26	0	0	38	0	0	8	47	0	28	0	0	0	0	58	23	30	37	25	10	0
ASV1700	Bacteria	Bacteroidota	Bacteroidia	Cytophagales	Hymenobacteraceae	Pontibacter	Pontibacter_populi	0.921973	0	24	0	0	0	0	0	0	0	0	0	0	0	0	0	0	16	0	0	0	0	0	0	19	0	0	0	0	0	0	11	0	12	42	0	0	28	0	0	0	0
ASV3280	Bacteria	Acidobacteriota	Vicinamibacteria	Vicinamibacterales	Vicinamibacteraceae	norank_f__Vicinamibacteraceae	NA	0.997843	0	0	22	18	18	0	0	0	0	7	6	18	0	10	8	0	0	0	31	0	0	20	13	0	21	26	0	0	0	0	0	10	0	0	0	0	0	0	0	0	11
ASV3258	Bacteria	Acidobacteriota	Vicinamibacteria	Vicinamibacterales	Vicinamibacteraceae	norank_f__Vicinamibacteraceae	NA	0.994195	0	0	23	30	27	0	0	0	0	26	0	20	0	0	19	0	0	0	21	0	0	25	22	0	23	18	0	0	0	0	0	17	0	0	0	0	0	0	0	0	29
ASV4656	Bacteria	Acidobacteriota	Vicinamibacteria	Vicinamibacterales	Vicinamibacteraceae	norank_f__Vicinamibacteraceae	NA	0.989832	0	0	0	28	11	0	0	0	0	0	13	0	0	14	0	0	0	0	13	0	0	0	0	0	0	0	10	0	0	0	0	14	0	0	0	0	0	0	0	0	0
ASV733	Bacteria	Acidobacteriota	Vicinamibacteria	Vicinamibacterales	Vicinamibacteraceae	norank_f__Vicinamibacteraceae	NA	0.99587	10	14	0	0	0	0	10	10	15	0	0	0	13	0	0	31	18	11	0	17	17	0	0	6	0	0	0	0	8	10	26	0	9	8	0	12	21	33	12	17	0
ASV829	Bacteria	Acidobacteriota	Vicinamibacteria	Vicinamibacterales	Vicinamibacteraceae	norank_f__Vicinamibacteraceae	uncultured_bacterium_g__norank_f__Vicinamibacteraceae	0.713794	9	0	0	0	0	0	6	14	11	0	0	0	0	0	0	12	7	10	0	14	7	0	0	0	0	0	0	0	0	0	0	0	8	0	0	0	14	21	0	0	0
ASV2402	Bacteria	Acidobacteriota	Vicinamibacteria	Vicinamibacterales	Vicinamibacteraceae	norank_f__Vicinamibacteraceae	NA	0.998625	0	7	26	11	13	0	0	0	0	0	9	0	8	19	10	0	0	0	17	0	0	0	0	16	0	12	6	7	15	11	25	0	0	0	0	7	0	16	0	0	12
ASV62	Bacteria	Acidobacteriota	Vicinamibacteria	Vicinamibacterales	Vicinamibacteraceae	norank_f__Vicinamibacteraceae	NA	0.998003	42	29	0	0	0	0	0	47	42	0	0	0	27	0	0	49	34	29	0	23	41	0	0	51	0	0	0	38	0	48	64	0	38	0	24	46	36	57	0	24	0
ASV2108	Bacteria	Acidobacteriota	Vicinamibacteria	Vicinamibacterales	Vicinamibacteraceae	norank_f__Vicinamibacteraceae	NA	0.997974	0	11	24	37	27	0	0	0	21	24	14	29	0	0	23	0	19	14	33	22	14	19	24	17	25	24	0	0	20	0	20	17	0	0	0	0	0	41	0	0	30
ASV3113	Bacteria	Acidobacteriota	Vicinamibacteria	Vicinamibacterales	Vicinamibacteraceae	norank_f__Vicinamibacteraceae	NA	0.998011	0	0	33	27	27	0	0	0	0	26	0	28	0	20	17	0	0	0	58	0	0	43	0	0	25	23	0	0	0	0	0	26	0	0	0	0	0	0	0	0	26
ASV3446	Bacteria	Acidobacteriota	Vicinamibacteria	Vicinamibacterales	Vicinamibacteraceae	norank_f__Vicinamibacteraceae	NA	0.993487	0	0	17	17	19	0	0	0	0	16	17	9	0	12	11	0	0	0	17	0	0	22	9	0	5	0	0	0	0	0	0	0	0	0	0	0	0	0	0	0	15
ASV759	Bacteria	Acidobacteriota	Vicinamibacteria	Vicinamibacterales	Vicinamibacteraceae	norank_f__Vicinamibacteraceae	NA	0.994668	10	14	0	0	0	21	14	14	18	0	0	0	10	0	0	23	22	16	0	18	15	0	0	7	0	0	0	5	0	10	19	0	7	14	0	8	20	33	30	0	0
ASV2005	Bacteria	Acidobacteriota	Vicinamibacteria	Vicinamibacterales	Vicinamibacteraceae	norank_f__Vicinamibacteraceae	uncultured_bacterium_g__norank_f__Vicinamibacteraceae	0.720363	0	13	0	0	0	0	10	0	17	0	0	0	0	0	0	22	26	0	0	11	6	0	0	7	0	0	0	7	0	0	21	0	0	13	0	0	15	13	0	0	0
ASV3774	Bacteria	Acidobacteriota	Vicinamibacteria	Vicinamibacterales	Vicinamibacteraceae	norank_f__Vicinamibacteraceae	NA	0.988205	0	0	10	12	0	0	0	0	0	22	0	31	0	8	0	0	0	0	11	0	0	13	0	0	11	7	0	0	0	0	0	20	0	0	0	0	0	0	0	0	15
ASV5645	Bacteria	Acidobacteriota	Vicinamibacteria	Vicinamibacterales	Vicinamibacteraceae	norank_f__Vicinamibacteraceae	uncultured_bacterium_gp6_g__norank_f__Vicinamibacteraceae	0.86895	0	0	0	0	18	0	0	0	0	0	0	13	0	0	0	0	0	0	13	0	0	13	0	0	0	0	0	0	0	0	0	0	0	0	0	0	0	0	0	0	0
ASV3316	Bacteria	Acidobacteriota	Vicinamibacteria	Vicinamibacterales	Vicinamibacteraceae	norank_f__Vicinamibacteraceae	uncultured_bacterium_gp6_g__norank_f__Vicinamibacteraceae	0.763603	0	0	21	17	12	0	0	0	0	15	0	0	0	13	12	0	0	0	0	0	0	16	13	0	0	0	0	0	0	0	0	9	0	0	0	0	0	0	0	0	0
ASV373	Bacteria	Acidobacteriota	Vicinamibacteria	Vicinamibacterales	Vicinamibacteraceae	norank_f__Vicinamibacteraceae	NA	0.989804	18	11	0	0	0	5	15	9	16	0	0	0	6	0	0	28	27	0	0	24	12	0	0	14	0	0	0	10	12	13	7	0	0	0	0	6	27	15	17	10	0
ASV529	Bacteria	Acidobacteriota	Vicinamibacteria	Vicinamibacterales	Vicinamibacteraceae	norank_f__Vicinamibacteraceae	NA	0.999159	14	15	0	0	0	0	0	0	10	0	0	0	18	0	0	17	15	0	0	0	13	0	0	0	0	0	0	0	0	11	21	0	0	0	0	0	0	17	0	10	0
ASV3239	Bacteria	Acidobacteriota	Vicinamibacteria	Vicinamibacterales	Vicinamibacteraceae	norank_f__Vicinamibacteraceae	NA	0.998128	0	0	24	54	30	0	10	11	0	22	18	43	0	29	29	0	0	16	42	18	0	40	16	15	26	38	0	18	0	0	0	31	0	0	0	0	0	0	0	0	39
ASV3491	Bacteria	Acidobacteriota	Vicinamibacteria	Vicinamibacterales	Vicinamibacteraceae	norank_f__Vicinamibacteraceae	uncultured_bacterium_gp6_g__norank_f__Vicinamibacteraceae	0.727795	0	0	16	15	14	0	0	0	0	10	0	12	0	0	0	0	0	0	17	0	0	0	17	0	19	15	14	0	0	0	0	0	0	0	0	0	0	0	0	0	0
ASV1805	Bacteria	Acidobacteriota	Vicinamibacteria	Vicinamibacterales	Vicinamibacteraceae	norank_f__Vicinamibacteraceae	uncultured_bacterium_gp6_g__norank_f__Vicinamibacteraceae	0.723112	0	19	0	0	0	0	0	0	0	0	0	0	0	0	0	34	29	18	0	0	0	0	0	0	0	0	0	0	0	0	23	0	0	0	0	0	31	0	0	0	0
ASV3010	Bacteria	Acidobacteriota	Vicinamibacteria	Vicinamibacterales	Vicinamibacteraceae	norank_f__Vicinamibacteraceae	uncultured_bacterium_gp6_g__norank_f__Vicinamibacteraceae	0.899348	0	0	65	60	59	0	0	0	0	30	18	48	0	40	25	0	0	0	116	0	0	48	45	0	37	42	13	0	0	0	0	61	0	0	0	0	0	0	0	0	51
ASV3579	Bacteria	Acidobacteriota	Vicinamibacteria	Vicinamibacterales	Vicinamibacteraceae	norank_f__Vicinamibacteraceae	NA	0.996886	0	0	14	19	9	0	0	0	0	0	0	0	0	9	12	0	0	0	17	0	0	8	7	0	0	0	0	0	0	0	0	0	0	0	0	0	0	0	0	0	10
ASV1860	Bacteria	Acidobacteriota	Vicinamibacteria	Vicinamibacterales	Vicinamibacteraceae	norank_f__Vicinamibacteraceae	uncultured_bacterium_gp6_g__norank_f__Vicinamibacteraceae	0.921851	0	17	0	0	0	0	0	0	26	0	0	0	0	0	0	27	17	21	0	0	29	0	0	0	0	0	0	0	0	22	0	0	0	22	0	0	0	22	0	0	0
ASV1767	Bacteria	Acidobacteriota	Vicinamibacteria	Vicinamibacterales	Vicinamibacteraceae	norank_f__Vicinamibacteraceae	uncultured_bacterium_gp6_g__norank_f__Vicinamibacteraceae	0.815966	0	20	0	0	0	19	28	35	25	0	0	0	28	0	0	24	24	0	0	14	20	0	0	26	0	0	0	0	24	23	14	0	33	0	6	21	33	34	0	25	0
ASV3125	Bacteria	Acidobacteriota	Vicinamibacteria	Vicinamibacterales	Vicinamibacteraceae	norank_f__Vicinamibacteraceae	NA	0.985057	0	0	32	47	27	0	0	0	0	7	16	30	0	29	21	0	0	0	64	0	0	24	21	6	22	16	7	0	0	0	0	21	0	0	0	0	0	0	0	0	18
ASV11950	Bacteria	Acidobacteriota	Vicinamibacteria	Vicinamibacterales	Vicinamibacteraceae	norank_f__Vicinamibacteraceae	NA	0.999676	0	0	0	0	0	0	0	0	0	0	0	0	0	0	0	0	0	0	0	13	0	0	0	0	0	0	0	0	0	0	0	0	0	0	0	0	0	0	0	0	0
ASV172	Bacteria	Acidobacteriota	Vicinamibacteria	Vicinamibacterales	Vicinamibacteraceae	norank_f__Vicinamibacteraceae	NA	0.999749	27	37	0	0	0	12	26	0	0	0	0	0	37	0	0	40	0	0	0	34	51	0	0	0	0	0	0	20	18	0	61	0	25	0	0	42	44	40	15	39	0
ASV152	Bacteria	Acidobacteriota	Vicinamibacteria	Vicinamibacterales	Vicinamibacteraceae	norank_f__Vicinamibacteraceae	NA	0.999867	28	0	0	0	0	0	0	30	33	0	0	0	0	0	0	0	32	0	0	0	0	0	0	28	0	0	0	0	0	38	37	0	0	11	6	36	0	0	0	0	0
ASV3543	Bacteria	Acidobacteriota	Vicinamibacteria	Vicinamibacterales	Vicinamibacteraceae	norank_f__Vicinamibacteraceae	NA	0.999856	0	0	15	32	0	0	0	0	0	12	8	26	0	12	21	0	0	39	17	0	0	26	10	0	13	22	0	0	0	0	0	28	0	0	0	0	0	0	0	0	23
ASV5633	Bacteria	Acidobacteriota	Vicinamibacteria	Vicinamibacterales	Vicinamibacteraceae	norank_f__Vicinamibacteraceae	NA	0.99972	0	0	0	0	18	0	0	0	0	0	8	0	0	0	0	0	0	0	0	0	0	0	0	0	0	0	0	0	0	0	0	0	0	0	0	0	0	0	0	0	0
ASV210	Bacteria	Acidobacteriota	Vicinamibacteria	Vicinamibacterales	Vicinamibacteraceae	Luteitalea	NA	0.998759	25	0	0	0	0	18	0	0	0	0	0	0	0	0	0	11	20	0	0	0	11	0	0	23	0	0	0	15	0	16	30	12	0	0	0	0	0	26	0	0	0
ASV1751	Bacteria	Acidobacteriota	Vicinamibacteria	Vicinamibacterales	Vicinamibacteraceae	Luteitalea	NA	0.999131	0	21	0	0	10	0	0	0	17	0	0	0	15	6	0	38	27	0	0	0	15	0	0	18	0	0	0	24	0	23	0	0	0	0	0	35	0	0	0	15	0
ASV11265	Bacteria	Acidobacteriota	Vicinamibacteria	Vicinamibacterales	Vicinamibacteraceae	Luteitalea	NA	0.999229	0	0	0	0	0	0	0	0	0	0	0	0	0	0	0	0	0	10	0	5	8	0	0	0	0	0	0	0	0	0	0	0	15	0	0	0	20	30	0	0	0
ASV4815	Bacteria	Acidobacteriota	Vicinamibacteria	Vicinamibacterales	Vicinamibacteraceae	Luteitalea	NA	0.998381	0	0	0	14	0	0	0	0	0	0	0	0	0	0	0	0	0	21	26	30	0	0	0	0	0	0	0	0	26	0	0	0	0	0	0	0	0	0	0	0	17
ASV3156	Bacteria	Acidobacteriota	Vicinamibacteria	Vicinamibacterales	Vicinamibacteraceae	Luteitalea	NA	0.999734	0	0	30	0	24	0	0	0	0	0	23	25	0	18	21	0	0	0	26	0	0	26	15	0	13	22	8	0	0	0	0	0	0	0	0	0	0	0	0	0	0
ASV7364	Bacteria	Acidobacteriota	Vicinamibacteria	Vicinamibacterales	Vicinamibacteraceae	Luteitalea	NA	0.99932	0	0	0	0	0	0	0	33	27	0	0	0	0	0	0	26	0	0	0	0	24	0	0	0	0	0	0	0	0	30	0	0	0	0	18	0	0	24	0	0	0
ASV2321	Bacteria	Acidobacteriota	Vicinamibacteria	Vicinamibacterales	Vicinamibacteraceae	Luteitalea	NA	0.999219	0	8	0	0	0	0	14	0	0	0	0	0	0	0	0	0	9	0	0	0	0	0	0	0	0	0	0	0	0	0	0	0	0	0	0	0	25	18	14	0	0
ASV877	Bacteria	Acidobacteriota	Vicinamibacteria	Vicinamibacterales	Vicinamibacteraceae	Luteitalea	NA	0.999208	8	0	27	10	18	0	0	0	0	0	0	13	0	5	23	13	0	8	37	9	0	19	10	0	12	14	8	0	0	0	12	13	8	0	0	15	0	0	0	0	22
ASV3317	Bacteria	Acidobacteriota	Vicinamibacteria	Vicinamibacterales	Vicinamibacteraceae	norank_f__Vicinamibacteraceae	NA	0.994104	0	0	21	0	15	0	0	0	0	0	0	21	0	0	0	0	0	0	0	0	0	21	14	0	14	15	0	0	0	0	0	24	0	0	0	0	0	0	0	0	0
ASV129	Bacteria	Acidobacteriota	Vicinamibacteria	Vicinamibacterales	Vicinamibacteraceae	norank_f__Vicinamibacteraceae	NA	0.998218	30	0	0	0	0	0	19	20	35	0	0	0	21	0	0	37	31	0	0	27	40	0	0	0	0	0	0	0	32	0	30	0	0	0	0	0	28	25	0	22	0
ASV2000	Bacteria	Acidobacteriota	Vicinamibacteria	Vicinamibacterales	Vicinamibacteraceae	norank_f__Vicinamibacteraceae	NA	0.999031	0	13	8	10	0	0	0	0	0	0	0	0	0	0	0	0	0	0	0	0	0	0	0	18	0	0	0	0	0	17	0	0	19	0	0	0	0	0	0	0	0
ASV3089	Bacteria	Acidobacteriota	Vicinamibacteria	Vicinamibacterales	Vicinamibacteraceae	norank_f__Vicinamibacteraceae	NA	0.999936	0	0	36	0	29	0	0	0	0	10	14	10	0	28	17	0	0	0	40	0	0	25	15	0	16	0	0	0	0	0	0	0	0	0	0	0	0	0	0	0	9
ASV3787	Bacteria	Acidobacteriota	Vicinamibacteria	Vicinamibacterales	Vicinamibacteraceae	norank_f__Vicinamibacteraceae	NA	0.999932	0	0	10	29	21	0	0	0	0	13	0	18	0	12	0	0	0	0	21	0	0	31	15	0	18	18	0	0	0	0	0	28	0	0	0	0	0	0	0	0	27
ASV577	Bacteria	Acidobacteriota	Vicinamibacteria	Vicinamibacterales	Vicinamibacteraceae	norank_f__Vicinamibacteraceae	NA	0.999938	13	14	0	0	0	14	0	12	16	0	0	0	7	0	0	16	8	0	0	27	13	0	0	16	0	0	0	12	12	13	18	0	0	0	0	0	20	12	17	21	0
ASV3318	Bacteria	Acidobacteriota	Vicinamibacteria	Vicinamibacterales	Vicinamibacteraceae	norank_f__Vicinamibacteraceae	NA	0.999866	0	0	21	14	9	0	0	0	0	10	0	0	0	19	0	0	0	0	43	0	0	15	0	0	21	12	0	0	0	0	0	0	0	0	0	0	0	0	0	0	0
ASV439	Bacteria	Acidobacteriota	Vicinamibacteria	Vicinamibacterales	Vicinamibacteraceae	norank_f__Vicinamibacteraceae	NA	0.999573	16	13	13	0	18	0	0	8	20	0	0	0	0	17	0	36	33	0	20	8	15	0	17	0	0	0	0	10	0	17	38	33	14	4	0	19	12	27	11	18	0
ASV3237	Bacteria	Acidobacteriota	Vicinamibacteria	Vicinamibacterales	Vicinamibacteraceae	norank_f__Vicinamibacteraceae	NA	0.999668	0	0	24	35	0	0	8	0	0	18	13	19	14	14	18	0	0	14	24	15	11	31	0	10	9	23	7	0	18	0	0	16	0	0	0	0	19	0	0	0	20
ASV3523	Bacteria	Acidobacteriota	Vicinamibacteria	Vicinamibacterales	Vicinamibacteraceae	norank_f__Vicinamibacteraceae	NA	0.99986	0	0	15	14	28	0	0	0	0	11	0	14	0	16	0	0	0	0	40	0	0	15	8	0	13	11	0	0	0	0	0	0	0	0	0	0	0	0	0	0	8
ASV3139	Bacteria	Acidobacteriota	Vicinamibacteria	Vicinamibacterales	Vicinamibacteraceae	norank_f__Vicinamibacteraceae	NA	0.999935	0	0	31	68	42	0	0	0	0	24	19	48	0	22	22	0	0	0	38	0	0	48	24	0	40	30	9	0	0	0	0	64	0	0	0	0	0	0	0	0	46
ASV2062	Bacteria	Acidobacteriota	Vicinamibacteria	Vicinamibacterales	Vicinamibacteraceae	norank_f__Vicinamibacteraceae	NA	0.999808	0	12	0	0	0	0	0	0	0	0	0	0	0	0	0	0	0	0	0	0	0	0	0	0	0	0	0	0	0	0	0	0	0	0	0	0	11	12	0	0	0
ASV3956	Bacteria	Acidobacteriota	Vicinamibacteria	Vicinamibacterales	Vicinamibacteraceae	norank_f__Vicinamibacteraceae	NA	0.999835	0	0	8	13	0	0	0	0	0	12	0	0	0	15	0	25	15	0	17	0	0	0	8	13	16	0	0	0	0	0	10	0	0	0	0	19	0	0	0	0	0
ASV1624	Bacteria	Acidobacteriota	Vicinamibacteria	Vicinamibacterales	Vicinamibacteraceae	norank_f__Vicinamibacteraceae	NA	0.999872	0	34	0	0	0	24	42	41	39	0	0	0	0	0	0	42	33	30	0	19	30	0	0	19	0	0	0	0	36	35	0	0	38	0	0	24	42	41	38	33	0
ASV10778	Bacteria	Acidobacteriota	Vicinamibacteria	Vicinamibacterales	Vicinamibacteraceae	norank_f__Vicinamibacteraceae	NA	0.999887	0	0	0	0	0	0	0	0	0	0	0	0	0	0	0	0	22	0	0	0	0	0	0	0	0	0	0	0	0	0	35	0	0	0	0	0	18	38	0	0	0
ASV171	Bacteria	Acidobacteriota	Vicinamibacteria	Vicinamibacterales	Vicinamibacteraceae	norank_f__Vicinamibacteraceae	NA	0.999889	27	23	0	0	0	0	0	0	0	0	0	0	36	0	14	27	31	16	13	34	16	0	0	22	15	0	0	30	0	0	32	0	0	0	0	0	21	34	0	24	0
ASV7366	Bacteria	Acidobacteriota	Vicinamibacteria	Vicinamibacterales	Vicinamibacteraceae	norank_f__Vicinamibacteraceae	NA	0.999908	0	0	0	0	0	0	0	32	0	0	0	0	26	0	0	0	0	0	0	0	0	0	0	41	0	0	0	40	22	0	0	0	0	0	0	0	0	0	0	0	0
ASV138	Bacteria	Acidobacteriota	Vicinamibacteria	Vicinamibacterales	Vicinamibacteraceae	norank_f__Vicinamibacteraceae	NA	0.999834	29	36	0	0	0	0	25	0	52	18	0	0	0	0	0	87	46	38	0	45	55	0	0	0	0	0	0	0	0	49	64	0	23	9	0	30	49	49	27	52	0
ASV3747	Bacteria	Acidobacteriota	Vicinamibacteria	Vicinamibacterales	Vicinamibacteraceae	norank_f__Vicinamibacteraceae	NA	0.999531	0	0	11	16	16	0	0	0	0	0	0	15	0	9	0	9	6	0	14	0	0	23	16	0	6	13	0	0	0	0	0	29	0	0	0	0	0	0	0	0	12
ASV162	Bacteria	Acidobacteriota	Vicinamibacteria	Vicinamibacterales	Vicinamibacteraceae	norank_f__Vicinamibacteraceae	uncultured_beta_proteobacterium_g__norank_f__Vicinamibacteraceae	0.730551	28	22	31	0	0	0	18	0	0	0	0	23	0	0	11	59	31	0	59	0	22	0	0	0	26	27	0	22	0	25	50	0	0	0	0	0	30	26	0	0	25
ASV118	Bacteria	Acidobacteriota	Vicinamibacteria	Vicinamibacterales	Vicinamibacteraceae	norank_f__Vicinamibacteraceae	NA	0.999839	31	0	0	0	0	0	0	0	49	0	0	0	35	0	0	0	28	0	0	33	15	0	0	0	0	0	0	0	19	0	20	0	0	0	0	0	0	27	0	23	0
ASV4621	Bacteria	Acidobacteriota	Vicinamibacteria	Vicinamibacterales	Vicinamibacteraceae	norank_f__Vicinamibacteraceae	NA	0.999911	0	0	0	47	22	0	0	0	0	0	0	0	0	0	0	0	0	0	0	0	0	0	0	0	0	0	0	0	0	0	0	38	0	0	0	0	0	0	0	0	0
ASV65	Bacteria	Acidobacteriota	Vicinamibacteria	Vicinamibacterales	Vicinamibacteraceae	norank_f__Vicinamibacteraceae	NA	0.999958	41	0	0	0	0	0	28	0	27	0	0	0	0	0	0	34	25	29	0	34	44	0	0	20	0	0	0	29	0	37	0	0	0	0	0	31	0	44	0	0	0
ASV2608	Bacteria	Acidobacteriota	Vicinamibacteria	Vicinamibacterales	Vicinamibacteraceae	norank_f__Vicinamibacteraceae	NA	0.999862	0	5	17	12	11	0	4	0	0	0	5	12	0	8	5	8	11	0	21	4	0	14	0	4	13	0	3	0	4	6	0	26	0	0	0	0	0	6	0	9	16
ASV1654	Bacteria	Acidobacteriota	Vicinamibacteria	Vicinamibacterales	Vicinamibacteraceae	norank_f__Vicinamibacteraceae	NA	0.999961	0	29	32	11	35	0	18	35	32	0	0	12	0	30	24	48	23	35	55	0	32	18	31	21	15	14	29	21	32	30	52	22	21	0	15	19	0	27	0	30	46
ASV3235	Bacteria	Acidobacteriota	Vicinamibacteria	Vicinamibacterales	Vicinamibacteraceae	norank_f__Vicinamibacteraceae	NA	0.999951	0	0	25	41	25	0	0	0	0	0	22	22	0	34	0	0	12	0	34	0	0	35	37	0	20	23	0	0	0	0	44	43	0	0	0	0	0	0	0	0	47
ASV16183	Bacteria	Acidobacteriota	Vicinamibacteria	Vicinamibacterales	Vicinamibacteraceae	norank_f__Vicinamibacteraceae	NA	0.999932	0	0	0	0	0	0	0	0	0	0	0	0	0	0	0	0	0	0	0	0	0	0	0	0	0	0	0	0	0	0	0	0	0	0	0	28	0	0	0	0	28
ASV3141	Bacteria	Acidobacteriota	Vicinamibacteria	Vicinamibacterales	Vicinamibacteraceae	norank_f__Vicinamibacteraceae	NA	0.99612	0	0	31	20	20	0	0	0	0	0	14	8	0	14	10	0	0	0	46	0	0	17	19	0	19	18	0	0	0	0	0	11	0	0	0	0	0	0	0	0	0
ASV3077	Bacteria	Acidobacteriota	Vicinamibacteria	Vicinamibacterales	Vicinamibacteraceae	norank_f__Vicinamibacteraceae	NA	0.997592	0	0	38	26	17	0	0	0	0	20	0	25	0	0	21	0	0	0	45	0	0	34	26	0	36	34	19	0	0	0	0	27	0	0	0	0	0	0	0	0	23
ASV325	Bacteria	Acidobacteriota	Vicinamibacteria	Vicinamibacterales	Vicinamibacteraceae	norank_f__Vicinamibacteraceae	NA	0.9949	20	35	0	0	0	12	20	27	33	0	0	0	23	0	0	43	27	37	0	48	36	0	0	19	0	0	0	17	29	21	20	0	16	10	0	20	31	46	17	13	0
ASV3100	Bacteria	Acidobacteriota	Vicinamibacteria	Vicinamibacterales	Vicinamibacteraceae	norank_f__Vicinamibacteraceae	NA	0.999045	0	0	35	13	17	0	0	0	0	0	0	0	0	26	0	0	0	0	60	0	0	0	22	0	26	0	0	0	0	0	0	0	0	0	0	0	0	0	0	0	0
ASV1925	Bacteria	Acidobacteriota	Vicinamibacteria	Vicinamibacterales	Vicinamibacteraceae	norank_f__Vicinamibacteraceae	NA	0.99932	0	15	0	0	0	0	0	0	0	0	0	0	0	0	0	0	0	0	0	0	0	0	0	0	0	0	0	0	16	11	0	0	0	0	0	0	0	0	0	0	0
ASV10132	Bacteria	Acidobacteriota	Vicinamibacteria	Vicinamibacterales	Vicinamibacteraceae	norank_f__Vicinamibacteraceae	NA	0.998597	0	0	0	0	0	0	0	0	0	0	0	0	0	0	0	33	15	16	0	10	21	0	0	0	0	0	0	0	0	0	0	0	0	0	0	0	18	24	16	14	0
ASV142	Bacteria	Acidobacteriota	Vicinamibacteria	Vicinamibacterales	Vicinamibacteraceae	norank_f__Vicinamibacteraceae	NA	0.999514	29	0	29	11	16	0	0	0	22	0	0	22	40	0	0	24	0	33	31	34	15	11	0	26	17	12	0	23	36	0	28	10	21	0	0	18	26	25	0	0	21
ASV3000	Bacteria	Acidobacteriota	Vicinamibacteria	Vicinamibacterales	Vicinamibacteraceae	norank_f__Vicinamibacteraceae	NA	0.99875	0	0	117	70	49	0	0	0	0	33	27	42	0	42	59	40	0	0	142	0	0	38	46	0	66	60	26	0	0	0	0	93	0	0	0	0	0	0	0	0	48
ASV207	Bacteria	Acidobacteriota	Vicinamibacteria	Vicinamibacterales	Vicinamibacteraceae	norank_f__Vicinamibacteraceae	NA	0.999412	25	34	0	0	0	0	32	0	36	0	0	0	35	0	0	0	0	0	0	36	42	0	0	32	0	0	0	26	0	52	41	0	0	0	0	23	38	27	0	0	0
ASV3329	Bacteria	Acidobacteriota	Vicinamibacteria	Vicinamibacterales	Vicinamibacteraceae	norank_f__Vicinamibacteraceae	NA	0.998163	0	0	21	0	0	0	0	0	0	0	0	0	0	13	20	0	0	0	24	0	0	10	18	17	0	0	0	0	0	0	0	13	0	0	0	0	0	0	0	0	0
ASV692	Bacteria	Acidobacteriota	Vicinamibacteria	Vicinamibacterales	Vicinamibacteraceae	norank_f__Vicinamibacteraceae	NA	0.992222	11	11	0	0	0	0	0	0	16	0	0	0	8	0	0	37	0	0	0	0	18	0	0	5	0	0	0	0	0	19	0	0	0	18	0	0	9	20	0	0	0
ASV2574	Bacteria	Acidobacteriota	Vicinamibacteria	Vicinamibacterales	Vicinamibacteraceae	norank_f__Vicinamibacteraceae	NA	0.987329	0	5	0	0	0	0	0	0	0	0	0	0	0	0	0	14	11	7	0	15	0	0	0	0	0	0	0	0	0	0	0	0	0	0	0	0	8	6	0	0	0
ASV4727	Bacteria	Acidobacteriota	Vicinamibacteria	Vicinamibacterales	Vicinamibacteraceae	norank_f__Vicinamibacteraceae	NA	0.999023	0	0	0	19	0	0	0	0	22	0	0	0	0	8	0	0	0	0	18	0	0	6	0	19	0	0	0	0	0	0	12	14	0	0	0	15	0	0	0	23	0
ASV353	Bacteria	Acidobacteriota	Vicinamibacteria	Vicinamibacterales	Vicinamibacteraceae	norank_f__Vicinamibacteraceae	NA	0.999529	19	0	0	0	0	0	0	0	0	0	0	0	0	0	0	19	13	8	0	0	9	0	0	0	0	0	0	0	0	0	0	0	0	0	0	0	0	0	0	0	0
ASV3683	Bacteria	Acidobacteriota	Vicinamibacteria	Vicinamibacterales	Vicinamibacteraceae	norank_f__Vicinamibacteraceae	NA	0.999348	0	0	12	16	22	0	0	0	0	15	0	22	0	22	18	25	0	0	24	0	0	21	11	0	0	8	0	0	0	0	0	14	0	0	0	0	0	0	23	0	12
ASV4730	Bacteria	Acidobacteriota	Vicinamibacteria	Vicinamibacterales	Vicinamibacteraceae	norank_f__Vicinamibacteraceae	NA	0.99983	0	0	0	19	0	0	0	0	0	0	39	24	0	18	0	0	0	0	0	0	0	33	0	0	22	0	0	0	0	0	0	18	0	0	0	0	0	0	0	0	0
ASV1845	Bacteria	Acidobacteriota	Vicinamibacteria	Vicinamibacterales	Vicinamibacteraceae	norank_f__Vicinamibacteraceae	NA	0.998413	0	17	51	81	41	0	15	15	12	38	25	62	0	49	24	16	19	15	67	14	31	51	41	14	27	26	20	0	0	12	9	132	0	0	0	10	32	40	0	0	61
ASV3405	Bacteria	Acidobacteriota	Vicinamibacteria	Vicinamibacterales	Vicinamibacteraceae	norank_f__Vicinamibacteraceae	NA	0.998832	0	0	18	24	18	0	0	0	0	0	0	33	0	0	0	0	0	13	32	17	0	34	20	0	20	18	0	0	0	11	0	37	0	0	0	0	16	0	0	0	17
ASV58	Bacteria	Acidobacteriota	Vicinamibacteria	Vicinamibacterales	Vicinamibacteraceae	norank_f__Vicinamibacteraceae	NA	0.999605	43	48	83	80	51	37	55	0	59	53	18	100	43	57	67	76	54	0	0	51	63	80	49	72	80	69	43	40	79	0	70	89	53	53	0	0	93	77	0	36	50
ASV3066	Bacteria	Acidobacteriota	Vicinamibacteria	Vicinamibacterales	Vicinamibacteraceae	norank_f__Vicinamibacteraceae	NA	0.998427	0	0	39	16	34	0	0	0	0	12	15	36	0	22	9	0	0	0	43	0	0	22	18	0	23	24	0	0	0	0	0	68	0	0	0	0	0	0	0	0	26
ASV1611	Bacteria	Acidobacteriota	Vicinamibacteria	Vicinamibacterales	Vicinamibacteraceae	norank_f__Vicinamibacteraceae	NA	0.999166	0	37	0	0	0	0	29	0	49	0	0	0	46	0	0	52	67	0	0	0	45	37	0	55	0	0	0	32	0	42	52	0	27	0	0	43	69	58	0	51	0
ASV3079	Bacteria	Acidobacteriota	Vicinamibacteria	Vicinamibacterales	Vicinamibacteraceae	norank_f__Vicinamibacteraceae	NA	0.998962	0	0	38	39	25	0	0	0	0	13	25	20	0	43	28	0	0	0	42	0	0	25	22	0	24	13	0	0	0	0	0	44	0	0	0	0	0	0	0	0	42
ASV82	Bacteria	Acidobacteriota	Vicinamibacteria	Vicinamibacterales	Vicinamibacteraceae	norank_f__Vicinamibacteraceae	NA	0.999318	37	0	70	49	62	0	0	0	0	35	0	24	0	52	45	0	0	45	78	41	0	0	52	0	42	51	23	0	0	0	0	51	0	0	0	0	0	0	0	0	34
ASV49	Bacteria	Acidobacteriota	Vicinamibacteria	Vicinamibacterales	Vicinamibacteraceae	norank_f__Vicinamibacteraceae	NA	0.999497	45	0	0	0	0	0	0	49	0	0	0	61	0	0	0	102	0	69	0	0	57	0	0	0	0	0	0	33	0	45	75	0	0	0	20	38	0	0	51	40	50
ASV1693	Bacteria	Acidobacteriota	Vicinamibacteria	Vicinamibacterales	Vicinamibacteraceae	norank_f__Vicinamibacteraceae	NA	0.999395	0	25	0	0	0	0	0	0	0	0	0	0	0	0	0	58	45	0	0	31	0	0	0	0	0	0	0	0	0	0	29	0	0	0	0	0	31	43	0	0	0
ASV3161	Bacteria	Acidobacteriota	Vicinamibacteria	Vicinamibacterales	Vicinamibacteraceae	norank_f__Vicinamibacteraceae	NA	0.999658	0	0	30	32	27	0	0	0	0	0	0	18	0	20	0	0	0	0	34	0	0	30	23	24	15	0	0	0	0	0	16	45	0	0	20	0	0	28	0	0	42
ASV741	Bacteria	Acidobacteriota	Vicinamibacteria	Vicinamibacterales	Vicinamibacteraceae	norank_f__Vicinamibacteraceae	NA	0.997626	10	0	11	0	9	0	0	13	0	11	0	9	0	7	8	21	0	0	14	13	5	9	0	0	10	14	0	15	0	12	22	10	0	0	9	12	12	0	0	0	9
ASV1662	Bacteria	Acidobacteriota	Vicinamibacteria	Vicinamibacterales	Vicinamibacteraceae	norank_f__Vicinamibacteraceae	NA	0.999726	0	28	0	0	0	0	25	0	0	0	0	25	0	0	0	29	25	0	0	21	28	0	0	0	0	0	0	0	0	37	21	34	0	0	0	0	30	32	0	0	47
ASV3136	Bacteria	Acidobacteriota	Vicinamibacteria	Vicinamibacterales	Vicinamibacteraceae	norank_f__Vicinamibacteraceae	NA	0.999671	0	0	32	0	0	0	0	0	0	0	0	0	0	0	0	0	0	0	45	0	0	0	0	0	0	0	0	0	0	0	0	0	0	0	0	0	0	0	0	0	0
ASV625	Bacteria	Acidobacteriota	Vicinamibacteria	Vicinamibacterales	Vicinamibacteraceae	norank_f__Vicinamibacteraceae	NA	0.999117	12	10	0	0	0	0	0	12	11	0	0	0	0	0	0	25	22	11	0	14	13	0	0	0	0	0	0	0	0	12	9	0	0	0	0	0	15	21	0	8	0
ASV4659	Bacteria	Acidobacteriota	Vicinamibacteria	Vicinamibacterales	Vicinamibacteraceae	norank_f__Vicinamibacteraceae	NA	0.999024	0	0	0	28	28	0	0	0	0	13	0	15	0	26	26	0	0	0	20	0	0	27	0	0	0	0	0	0	0	0	0	28	0	0	0	0	0	0	0	0	19
ASV18985	Bacteria	Acidobacteriota	Vicinamibacteria	Vicinamibacterales	Vicinamibacteraceae	norank_f__Vicinamibacteraceae	NA	0.999708	0	0	0	0	0	0	0	0	0	0	0	0	0	0	0	0	0	0	0	0	0	0	0	0	0	0	0	0	0	0	0	0	0	0	0	0	0	0	0	0	0
ASV208	Bacteria	Acidobacteriota	Vicinamibacteria	Vicinamibacterales	Vicinamibacteraceae	norank_f__Vicinamibacteraceae	NA	0.999231	25	0	0	0	0	0	0	0	31	0	0	0	32	0	0	13	21	0	0	19	0	0	0	0	0	0	0	0	0	0	18	0	0	25	0	0	13	17	0	0	0
ASV3204	Bacteria	Acidobacteriota	Vicinamibacteria	Vicinamibacterales	Vicinamibacteraceae	norank_f__Vicinamibacteraceae	NA	0.998525	0	0	27	19	19	0	0	0	0	23	0	0	0	0	0	0	0	0	19	0	0	20	20	0	0	0	0	0	0	0	0	11	0	0	0	0	0	0	0	0	24
ASV3186	Bacteria	Acidobacteriota	Vicinamibacteria	Vicinamibacterales	Vicinamibacteraceae	norank_f__Vicinamibacteraceae	NA	0.99675	0	0	27	50	32	0	0	0	0	28	23	21	0	31	30	0	0	0	41	0	0	30	18	0	28	29	18	0	0	0	0	48	0	0	0	0	0	0	0	0	28
ASV6345	Bacteria	Acidobacteriota	Vicinamibacteria	Vicinamibacterales	Vicinamibacteraceae	norank_f__Vicinamibacteraceae	NA	0.999663	0	0	0	0	0	37	0	0	34	0	0	0	0	0	0	21	0	45	0	33	42	0	0	56	0	0	0	41	0	0	38	0	0	0	26	45	37	35	0	0	0
ASV490	Bacteria	Acidobacteriota	Vicinamibacteria	Vicinamibacterales	Vicinamibacteraceae	norank_f__Vicinamibacteraceae	NA	0.999161	15	23	0	0	0	0	0	0	17	0	0	0	22	0	0	0	0	0	0	0	31	0	0	23	0	0	0	18	37	0	11	0	0	0	0	0	29	0	0	14	0
ASV6662	Bacteria	Acidobacteriota	Vicinamibacteria	Vicinamibacterales	Vicinamibacteraceae	norank_f__Vicinamibacteraceae	NA	0.999273	0	0	0	0	0	0	23	46	0	0	0	0	0	0	0	38	33	15	0	26	0	0	0	0	0	0	0	0	0	16	0	0	0	0	0	0	0	53	36	0	0
ASV3268	Bacteria	Acidobacteriota	Vicinamibacteria	Vicinamibacterales	Vicinamibacteraceae	norank_f__Vicinamibacteraceae	NA	0.999107	0	0	23	46	42	0	0	0	0	39	0	48	0	39	22	0	0	0	22	0	0	31	15	0	0	32	0	0	0	0	0	51	0	0	0	0	0	0	0	0	47
ASV1824	Bacteria	Acidobacteriota	Vicinamibacteria	Vicinamibacterales	Vicinamibacteraceae	norank_f__Vicinamibacteraceae	NA	0.999176	0	18	0	0	0	0	0	0	0	0	0	0	0	0	0	24	0	0	17	0	0	0	0	0	0	0	21	0	0	0	0	0	0	0	0	0	0	0	0	0	0
ASV3021	Bacteria	Acidobacteriota	Vicinamibacteria	Vicinamibacterales	Vicinamibacteraceae	norank_f__Vicinamibacteraceae	uncultured_beta_proteobacterium_g__norank_f__Vicinamibacteraceae	0.748803	0	0	54	0	21	0	0	0	0	0	29	16	0	0	36	0	0	27	50	20	0	31	18	28	33	0	0	0	0	0	0	39	0	0	0	0	0	0	0	0	0
ASV4628	Bacteria	Acidobacteriota	Vicinamibacteria	Vicinamibacterales	Vicinamibacteraceae	norank_f__Vicinamibacteraceae	NA	0.99941	0	0	0	39	0	0	0	0	0	25	0	0	0	25	0	0	0	0	0	0	0	0	0	0	0	0	0	0	0	0	0	29	0	0	0	0	0	0	0	0	0
ASV3130	Bacteria	Acidobacteriota	Vicinamibacteria	Vicinamibacterales	Vicinamibacteraceae	norank_f__Vicinamibacteraceae	NA	0.998376	0	0	32	30	49	0	0	0	0	30	15	35	9	25	32	0	0	0	68	10	0	50	25	7	16	20	13	0	0	0	0	52	0	0	0	0	0	0	0	0	34
ASV3508	Bacteria	Acidobacteriota	Vicinamibacteria	Vicinamibacterales	Vicinamibacteraceae	norank_f__Vicinamibacteraceae	NA	0.997683	0	0	16	0	18	0	0	0	0	0	0	0	0	0	0	0	0	0	15	0	0	0	0	0	14	0	0	0	0	0	0	0	0	0	0	0	0	0	0	0	0
ASV1886	Bacteria	Acidobacteriota	Vicinamibacteria	Vicinamibacterales	Vicinamibacteraceae	norank_f__Vicinamibacteraceae	NA	0.999659	0	16	15	13	18	0	0	0	0	11	0	0	0	12	17	20	15	0	16	0	12	0	0	0	15	0	0	0	0	0	0	0	0	0	0	0	20	0	0	0	0
ASV11939	Bacteria	Acidobacteriota	Vicinamibacteria	Vicinamibacterales	Vicinamibacteraceae	norank_f__Vicinamibacteraceae	NA	0.999759	0	0	0	0	0	0	0	0	0	0	0	0	0	0	0	0	0	0	0	14	0	0	0	0	0	0	0	0	0	0	0	0	0	0	0	0	0	16	0	0	0
ASV3895	Bacteria	Acidobacteriota	Vicinamibacteria	Vicinamibacterales	Vicinamibacteraceae	norank_f__Vicinamibacteraceae	uncultured_Geothrix_sp._g__norank_f__Vicinamibacteraceae	0.805327	0	0	9	27	7	0	0	0	0	0	0	11	0	6	10	0	0	0	22	0	0	14	0	0	0	12	0	0	0	0	0	24	0	0	0	0	0	0	0	0	11
ASV524	Bacteria	Acidobacteriota	Vicinamibacteria	Vicinamibacterales	Vicinamibacteraceae	norank_f__Vicinamibacteraceae	NA	0.998051	14	0	0	0	0	6	0	8	0	0	0	0	8	0	0	0	21	16	0	9	19	0	0	0	0	0	0	0	0	0	17	0	0	0	0	5	14	15	0	0	0
ASV264	Bacteria	Acidobacteriota	Vicinamibacteria	Vicinamibacterales	Vicinamibacteraceae	Vicinamibacter	NA	0.998008	22	13	36	71	39	5	20	12	19	33	0	43	14	42	32	22	26	17	61	18	29	66	23	0	36	31	19	22	19	15	22	51	0	3	0	11	25	38	0	14	41
ASV3556	Bacteria	Acidobacteriota	Vicinamibacteria	Vicinamibacterales	Vicinamibacteraceae	Vicinamibacter	NA	0.993849	0	0	15	37	0	0	0	0	0	13	26	28	0	0	19	0	0	0	27	0	0	36	13	0	19	17	0	0	0	0	4	28	0	0	0	0	0	0	0	0	0
ASV297	Bacteria	Acidobacteriota	Vicinamibacteria	Vicinamibacterales	Vicinamibacteraceae	NA	NA	0.99833	21	0	35	43	37	0	10	0	33	36	0	82	22	27	41	47	38	24	65	20	0	55	34	27	43	35	13	15	29	0	32	54	20	7	0	22	0	0	0	0	39
ASV1737	Bacteria	Acidobacteriota	Vicinamibacteria	Vicinamibacterales	Vicinamibacteraceae	NA	NA	0.998301	0	22	0	0	0	0	0	19	0	0	0	0	0	0	0	0	0	0	0	0	0	0	0	0	0	0	0	0	0	0	13	0	0	0	0	0	31	30	0	23	0
ASV5686	Bacteria	Acidobacteriota	Vicinamibacteria	Vicinamibacterales	Vicinamibacteraceae	NA	NA	0.997263	0	0	0	0	15	6	0	0	0	0	14	0	0	0	0	0	0	0	0	0	0	0	0	0	0	0	0	0	0	0	0	0	0	0	0	0	0	12	0	0	0
ASV4696	Bacteria	Acidobacteriota	Vicinamibacteria	Vicinamibacterales	Vicinamibacteraceae	NA	NA	0.996167	0	0	0	22	0	0	0	0	0	0	0	0	0	0	0	0	0	0	19	0	0	26	0	0	0	0	0	0	0	0	0	0	0	0	0	0	0	0	0	0	0
ASV3630	Bacteria	Acidobacteriota	Vicinamibacteria	Vicinamibacterales	Vicinamibacteraceae	norank_f__Vicinamibacteraceae	NA	0.999845	0	0	13	9	7	0	0	0	0	7	5	15	0	0	7	0	10	0	27	7	0	21	0	0	11	9	0	0	9	0	0	7	0	0	0	0	13	0	0	0	15
ASV624	Bacteria	Acidobacteriota	Vicinamibacteria	Vicinamibacterales	Vicinamibacteraceae	norank_f__Vicinamibacteraceae	NA	0.999906	12	9	0	0	0	0	10	12	0	0	0	0	0	0	0	21	17	10	0	28	14	0	0	0	0	0	0	0	11	8	18	0	0	0	0	0	0	13	0	12	0
ASV84	Bacteria	Acidobacteriota	Vicinamibacteria	Vicinamibacterales	Vicinamibacteraceae	norank_f__Vicinamibacteraceae	NA	0.999786	36	55	0	0	0	19	37	31	57	0	0	0	21	0	0	89	70	66	0	38	73	0	0	25	0	0	0	24	27	74	58	0	20	27	0	27	63	56	23	27	0
ASV682	Bacteria	Acidobacteriota	Vicinamibacteria	Vicinamibacterales	Vicinamibacteraceae	norank_f__Vicinamibacteraceae	NA	0.999371	11	12	21	19	16	5	10	10	36	0	0	21	26	15	6	32	19	18	20	25	0	10	8	80	12	8	0	37	10	0	44	10	12	0	18	76	25	9	13	12	7
ASV3084	Bacteria	Acidobacteriota	Vicinamibacteria	Vicinamibacterales	Vicinamibacteraceae	norank_f__Vicinamibacteraceae	NA	0.999613	0	0	37	22	21	0	0	0	0	6	0	24	0	0	16	0	0	0	54	0	0	45	18	0	54	43	0	0	0	0	0	38	0	0	0	0	0	0	0	0	18
ASV475	Bacteria	Acidobacteriota	Vicinamibacteria	Vicinamibacterales	Vicinamibacteraceae	norank_f__Vicinamibacteraceae	NA	0.999322	15	16	0	0	0	6	12	0	19	0	0	0	13	0	0	22	20	18	0	12	16	0	0	19	0	0	0	0	11	14	15	0	6	0	0	13	34	29	8	13	0
ASV164	Bacteria	Acidobacteriota	Vicinamibacteria	Vicinamibacterales	Vicinamibacteraceae	norank_f__Vicinamibacteraceae	NA	0.999859	27	18	11	0	12	0	6	19	25	0	9	0	9	16	0	38	21	23	16	34	17	10	0	10	0	10	0	23	12	11	32	23	11	0	6	19	25	24	13	15	28
ASV176	Bacteria	Acidobacteriota	Vicinamibacteria	Vicinamibacterales	Vicinamibacteraceae	norank_f__Vicinamibacteraceae	NA	0.999867	26	26	100	65	100	20	22	14	33	79	22	66	45	104	88	48	45	21	130	21	30	89	51	77	86	64	44	64	17	27	67	55	13	14	8	65	40	47	28	34	63
ASV2206	Bacteria	Acidobacteriota	Vicinamibacteria	Vicinamibacterales	Vicinamibacteraceae	norank_f__Vicinamibacteraceae	NA	0.999922	0	9	56	52	65	0	0	15	13	47	25	57	0	36	40	17	0	13	86	9	11	85	55	20	61	67	0	15	0	13	24	49	0	0	7	14	11	0	0	0	68
ASV4858	Bacteria	Acidobacteriota	Vicinamibacteria	Vicinamibacterales	Vicinamibacteraceae	norank_f__Vicinamibacteraceae	NA	0.999923	0	0	0	13	0	0	0	0	0	0	0	14	0	13	14	0	0	0	0	0	0	26	0	0	0	0	24	0	0	0	0	13	0	0	0	0	0	0	0	0	16
ASV4739	Bacteria	Acidobacteriota	Vicinamibacteria	Vicinamibacterales	Vicinamibacteraceae	norank_f__Vicinamibacteraceae	NA	0.999841	0	0	0	18	12	0	0	0	0	24	0	9	0	12	24	0	0	0	14	0	0	29	9	0	0	11	12	0	0	0	0	15	0	0	0	0	0	0	0	0	15
ASV10760	Bacteria	Acidobacteriota	Vicinamibacteria	Vicinamibacterales	Vicinamibacteraceae	norank_f__Vicinamibacteraceae	NA	0.999974	0	0	0	0	0	0	0	0	0	0	0	0	0	0	0	0	36	0	0	0	0	0	0	0	0	0	0	0	0	0	0	0	0	0	0	0	0	0	0	0	0
ASV3776	Bacteria	Acidobacteriota	Vicinamibacteria	Vicinamibacterales	Vicinamibacteraceae	norank_f__Vicinamibacteraceae	NA	0.99978	0	0	10	4	18	0	0	5	0	6	5	5	0	7	5	0	0	0	20	5	12	8	14	3	17	6	0	0	0	0	0	11	0	0	0	0	0	7	0	0	5
ASV3122	Bacteria	Acidobacteriota	Vicinamibacteria	Vicinamibacterales	Vicinamibacteraceae	norank_f__Vicinamibacteraceae	NA	0.999962	0	0	33	21	26	0	0	0	0	22	0	0	0	19	25	0	0	0	25	0	0	30	25	0	0	0	15	0	0	0	0	24	0	0	0	0	0	0	0	0	18
ASV96	Bacteria	Acidobacteriota	Vicinamibacteria	Vicinamibacterales	Vicinamibacteraceae	norank_f__Vicinamibacteraceae	NA	0.999962	35	0	0	0	0	0	0	0	0	0	0	0	0	0	0	0	0	30	0	0	40	0	0	25	0	0	0	0	0	0	0	0	0	0	0	0	0	0	0	0	0
ASV3299	Bacteria	Acidobacteriota	Vicinamibacteria	Vicinamibacterales	Vicinamibacteraceae	norank_f__Vicinamibacteraceae	NA	0.999965	0	0	22	29	29	0	0	0	0	17	0	0	0	35	0	0	0	0	40	0	0	41	54	0	0	0	22	0	0	0	0	27	0	0	0	0	0	0	0	0	24
ASV6653	Bacteria	Acidobacteriota	Vicinamibacteria	Vicinamibacterales	Vicinamibacteraceae	norank_f__Vicinamibacteraceae	NA	0.999963	0	0	0	0	0	0	26	19	0	0	0	0	0	0	34	0	0	0	0	36	0	0	0	0	78	71	0	0	26	25	31	0	0	0	0	0	42	31	0	0	0
ASV322	Bacteria	Acidobacteriota	Vicinamibacteria	Vicinamibacterales	Vicinamibacteraceae	norank_f__Vicinamibacteraceae	NA	0.999938	20	39	42	22	14	0	0	24	29	0	0	0	32	45	23	44	30	27	56	30	30	13	26	26	29	0	0	38	14	22	25	18	24	0	7	32	18	30	0	30	41
ASV3327	Bacteria	Acidobacteriota	Vicinamibacteria	Vicinamibacterales	Vicinamibacteraceae	norank_f__Vicinamibacteraceae	NA	0.999968	0	0	21	41	34	0	0	0	0	30	34	54	0	0	0	40	0	0	49	0	0	48	0	0	0	30	0	0	0	0	0	44	0	0	0	38	0	0	0	0	38
ASV361	Bacteria	Acidobacteriota	Vicinamibacteria	Vicinamibacterales	Vicinamibacteraceae	norank_f__Vicinamibacteraceae	NA	0.993777	18	18	0	5	0	0	11	24	26	0	0	0	6	0	0	24	27	17	0	20	31	0	0	10	0	0	0	12	0	26	20	0	8	0	0	6	13	47	11	12	0
ASV3177	Bacteria	Acidobacteriota	Vicinamibacteria	Vicinamibacterales	Vicinamibacteraceae	norank_f__Vicinamibacteraceae	NA	0.99875	0	0	28	34	32	0	0	0	0	20	12	12	0	33	18	0	0	0	27	0	0	25	15	0	20	19	5	0	0	0	0	21	0	0	0	0	0	0	0	0	26
ASV386	Bacteria	Acidobacteriota	Vicinamibacteria	Vicinamibacterales	Vicinamibacteraceae	norank_f__Vicinamibacteraceae	NA	0.998732	18	19	0	0	0	0	13	18	13	0	0	0	12	0	0	55	38	12	0	28	26	0	0	28	0	0	0	15	0	33	40	0	10	0	26	37	25	30	11	0	0
ASV3223	Bacteria	Acidobacteriota	Vicinamibacteria	Vicinamibacterales	Vicinamibacteraceae	norank_f__Vicinamibacteraceae	NA	0.998234	0	0	25	25	16	0	0	0	0	13	0	16	27	25	23	29	18	0	43	0	0	34	18	57	16	11	0	44	0	0	25	11	0	0	12	32	0	0	0	0	21
ASV68	Bacteria	Acidobacteriota	Vicinamibacteria	Vicinamibacterales	Vicinamibacteraceae	norank_f__Vicinamibacteraceae	NA	0.997366	40	23	0	0	0	12	13	22	34	0	0	0	0	0	0	44	29	21	0	20	33	0	0	0	0	0	0	0	0	25	33	0	22	0	0	23	41	34	0	53	0
ASV259	Bacteria	Acidobacteriota	Vicinamibacteria	Vicinamibacterales	norank_o__Vicinamibacterales	norank_f__norank_o__Vicinamibacterales	uncultured_Acidobacteriales_bacterium_g__norank_f__norank_o__Vicinamibacterales	0.820883	22	9	0	0	0	0	0	16	19	0	0	0	13	0	0	32	25	25	0	21	26	0	0	39	0	0	0	24	10	8	39	13	10	0	0	21	24	13	10	24	0
ASV3188	Bacteria	Acidobacteriota	Vicinamibacteria	Vicinamibacterales	norank_o__Vicinamibacterales	norank_f__norank_o__Vicinamibacterales	uncultured_Acidobacteriales_bacterium_g__norank_f__norank_o__Vicinamibacterales	0.775516	0	0	27	25	17	0	0	0	0	0	14	30	9	14	17	0	0	0	16	0	0	26	14	11	23	9	12	0	0	0	0	26	7	0	8	16	0	0	0	0	20
ASV3359	Bacteria	Acidobacteriota	Vicinamibacteria	Vicinamibacterales	norank_o__Vicinamibacterales	norank_f__norank_o__Vicinamibacterales	NA	0.999953	0	0	19	42	44	0	0	0	0	31	16	75	0	15	30	0	0	0	19	0	0	91	6	8	9	34	19	0	0	0	0	49	0	0	0	8	0	0	0	0	39
ASV3607	Bacteria	Acidobacteriota	Vicinamibacteria	Vicinamibacterales	norank_o__Vicinamibacterales	norank_f__norank_o__Vicinamibacterales	NA	0.999957	0	0	13	45	23	0	0	0	0	14	11	16	0	8	10	0	0	0	17	0	0	32	11	0	11	12	11	0	0	0	0	30	0	0	0	0	0	0	0	0	12
ASV4148	Bacteria	Acidobacteriota	Vicinamibacteria	Vicinamibacterales	norank_o__Vicinamibacterales	norank_f__norank_o__Vicinamibacterales	NA	0.999949	0	0	6	13	14	0	0	0	0	16	11	30	0	11	9	0	0	0	11	0	0	26	0	0	6	9	0	0	0	0	0	24	0	0	0	0	0	0	0	0	13
ASV3449	Bacteria	Acidobacteriota	Vicinamibacteria	Vicinamibacterales	norank_o__Vicinamibacterales	norank_f__norank_o__Vicinamibacterales	uncultured_Acidobacteriales_bacterium_g__norank_f__norank_o__Vicinamibacterales	0.719946	0	0	17	16	12	0	0	0	0	0	0	6	0	14	13	0	0	0	17	0	0	15	8	0	0	0	8	0	0	0	0	9	0	0	0	0	0	0	0	0	11
ASV2007	Bacteria	Acidobacteriota	Vicinamibacteria	Vicinamibacterales	norank_o__Vicinamibacterales	norank_f__norank_o__Vicinamibacterales	NA	0.999997	0	13	0	8	14	0	24	0	0	0	0	7	0	8	11	0	0	0	8	9	11	14	0	0	12	0	0	0	0	0	0	0	0	0	0	0	0	0	0	0	16
ASV3195	Bacteria	Acidobacteriota	Vicinamibacteria	Vicinamibacterales	norank_o__Vicinamibacterales	norank_f__norank_o__Vicinamibacterales	NA	0.999965	0	0	27	39	36	0	0	0	0	34	22	15	0	21	0	0	0	0	15	0	0	49	7	0	17	20	0	0	0	0	0	28	0	0	0	0	0	0	0	0	29
ASV3058	Bacteria	Acidobacteriota	Vicinamibacteria	Vicinamibacterales	norank_o__Vicinamibacterales	norank_f__norank_o__Vicinamibacterales	NA	0.999997	0	0	41	42	55	0	0	0	0	34	11	22	0	31	25	0	0	0	86	0	0	38	23	8	23	21	15	0	0	0	0	25	0	0	0	0	0	0	0	0	38
ASV6380	Bacteria	Acidobacteriota	Vicinamibacteria	Vicinamibacterales	norank_o__Vicinamibacterales	norank_f__norank_o__Vicinamibacterales	NA	0.999998	0	0	0	0	0	21	29	32	38	0	0	0	36	0	0	39	25	42	0	44	24	0	0	50	0	0	0	29	22	18	30	0	18	11	0	29	20	21	19	28	0
ASV254	Bacteria	Acidobacteriota	Vicinamibacteria	Vicinamibacterales	norank_o__Vicinamibacterales	norank_f__norank_o__Vicinamibacterales	NA	0.999998	23	38	0	0	0	0	0	0	0	0	0	0	0	0	0	0	38	0	0	0	21	0	0	0	0	0	0	0	0	30	28	0	0	0	0	0	33	41	0	0	0
ASV9981	Bacteria	Acidobacteriota	Vicinamibacteria	Vicinamibacterales	norank_o__Vicinamibacterales	norank_f__norank_o__Vicinamibacterales	NA	0.999986	0	0	0	0	0	0	0	0	0	0	0	0	0	0	18	0	0	0	0	0	0	0	0	0	0	0	0	0	0	0	0	24	0	0	0	0	0	0	0	0	0
ASV4799	Bacteria	Acidobacteriota	Vicinamibacteria	Vicinamibacterales	norank_o__Vicinamibacterales	norank_f__norank_o__Vicinamibacterales	NA	0.999985	0	0	0	15	34	0	0	0	0	26	17	42	0	17	0	0	0	0	29	0	0	29	12	0	25	35	15	0	0	0	0	0	0	0	0	5	0	0	0	0	20
ASV809	Bacteria	Acidobacteriota	Vicinamibacteria	Vicinamibacterales	norank_o__Vicinamibacterales	norank_f__norank_o__Vicinamibacterales	metagenome_g__norank_f__norank_o__Vicinamibacterales	0.955809	9	0	0	0	0	0	0	16	12	0	0	0	0	0	0	24	9	19	0	7	18	0	0	14	0	0	0	0	0	0	19	0	23	0	0	15	12	19	0	11	0
ASV3106	Bacteria	Acidobacteriota	Vicinamibacteria	Vicinamibacterales	norank_o__Vicinamibacterales	norank_f__norank_o__Vicinamibacterales	metagenome_g__norank_f__norank_o__Vicinamibacterales	0.965896	0	0	34	30	20	0	0	0	0	15	0	20	0	17	23	0	0	0	35	0	0	32	0	0	34	38	0	0	0	0	0	23	0	0	0	0	0	0	0	0	17
ASV496	Bacteria	Acidobacteriota	Vicinamibacteria	Vicinamibacterales	norank_o__Vicinamibacterales	norank_f__norank_o__Vicinamibacterales	metagenome_g__norank_f__norank_o__Vicinamibacterales	0.967694	15	22	0	0	0	0	0	0	19	0	0	21	30	0	0	20	24	15	20	9	19	0	0	21	0	0	0	9	0	10	9	21	0	0	0	0	18	21	0	5	0
ASV972	Bacteria	Acidobacteriota	Vicinamibacteria	Vicinamibacterales	norank_o__Vicinamibacterales	norank_f__norank_o__Vicinamibacterales	metagenome_g__norank_f__norank_o__Vicinamibacterales	0.976519	7	14	46	14	14	0	9	12	14	8	0	38	12	10	21	17	23	15	33	14	17	27	10	10	25	23	6	7	10	15	14	30	11	0	14	0	21	22	6	0	13
ASV441	Bacteria	Acidobacteriota	Vicinamibacteria	Vicinamibacterales	norank_o__Vicinamibacterales	norank_f__norank_o__Vicinamibacterales	metagenome_g__norank_f__norank_o__Vicinamibacterales	0.930917	16	10	0	0	0	0	7	11	18	0	0	0	0	0	0	22	29	0	0	10	16	0	0	7	0	0	0	0	0	12	18	0	0	7	0	7	14	29	0	8	0
ASV239	Bacteria	Acidobacteriota	Vicinamibacteria	Vicinamibacterales	norank_o__Vicinamibacterales	norank_f__norank_o__Vicinamibacterales	metagenome_g__norank_f__norank_o__Vicinamibacterales	0.96509	23	17	0	0	0	13	10	6	28	0	0	0	0	0	0	37	20	23	0	10	36	0	0	0	0	0	0	10	16	14	18	0	0	16	0	15	17	28	21	13	0
ASV9133	Bacteria	Acidobacteriota	Vicinamibacteria	Vicinamibacterales	norank_o__Vicinamibacterales	norank_f__norank_o__Vicinamibacterales	NA	0.999995	0	0	0	0	0	0	0	0	0	0	0	0	18	0	0	0	17	0	0	0	0	0	0	0	0	0	0	0	0	0	14	0	0	0	0	0	0	0	0	0	0
ASV1652	Bacteria	Acidobacteriota	Vicinamibacteria	Vicinamibacterales	norank_o__Vicinamibacterales	norank_f__norank_o__Vicinamibacterales	NA	0.999991	0	29	0	0	0	0	0	0	0	0	0	0	0	0	0	28	0	16	0	0	19	0	0	0	0	0	0	0	0	31	0	0	0	0	0	0	13	23	0	0	0
ASV3408	Bacteria	Acidobacteriota	Vicinamibacteria	Vicinamibacterales	norank_o__Vicinamibacterales	norank_f__norank_o__Vicinamibacterales	NA	0.999991	0	0	18	15	16	0	0	0	0	0	0	10	0	13	12	0	0	0	17	0	0	10	12	10	0	13	0	11	0	0	0	0	0	0	0	0	0	0	0	16	0
ASV7634	Bacteria	Acidobacteriota	Vicinamibacteria	Vicinamibacterales	norank_o__Vicinamibacterales	norank_f__norank_o__Vicinamibacterales	NA	0.999993	0	0	0	0	0	0	0	0	26	0	0	0	0	0	0	0	11	0	0	0	13	0	0	0	0	0	0	0	0	0	0	0	0	0	0	0	26	17	0	0	0
ASV2145	Bacteria	Acidobacteriota	Vicinamibacteria	Vicinamibacterales	norank_o__Vicinamibacterales	norank_f__norank_o__Vicinamibacterales	unclassified_g__norank_f__norank_o__Vicinamibacterales	0.857289	0	10	0	0	0	0	0	0	0	0	0	0	0	0	0	19	0	0	0	11	0	0	0	0	0	0	0	0	18	0	14	0	25	0	0	0	10	25	17	0	0
ASV6767	Bacteria	Acidobacteriota	Vicinamibacteria	Vicinamibacterales	norank_o__Vicinamibacterales	norank_f__norank_o__Vicinamibacterales	NA	0.999992	0	0	0	0	0	0	13	21	13	0	0	0	0	0	0	18	12	0	7	0	9	0	0	0	0	0	0	0	0	0	8	0	0	0	0	0	10	12	0	0	0
ASV1966	Bacteria	Acidobacteriota	Vicinamibacteria	Vicinamibacterales	norank_o__Vicinamibacterales	norank_f__norank_o__Vicinamibacterales	NA	0.999991	0	14	0	0	0	0	0	0	0	0	0	0	0	0	0	0	0	0	0	23	0	0	0	12	0	0	0	0	0	0	13	0	0	0	0	0	0	0	0	35	0
ASV424	Bacteria	Acidobacteriota	Vicinamibacteria	Vicinamibacterales	norank_o__Vicinamibacterales	norank_f__norank_o__Vicinamibacterales	metagenome_g__norank_f__norank_o__Vicinamibacterales	0.735956	17	0	0	0	0	20	0	25	24	0	0	0	0	0	0	23	23	0	0	21	19	0	0	30	0	0	0	25	0	0	21	0	0	0	0	0	25	46	23	0	0
ASV3256	Bacteria	Acidobacteriota	Vicinamibacteria	Vicinamibacterales	norank_o__Vicinamibacterales	norank_f__norank_o__Vicinamibacterales	metagenome_g__norank_f__norank_o__Vicinamibacterales	0.854081	0	0	23	13	14	0	0	0	0	12	8	14	0	0	10	0	0	0	20	0	0	0	10	0	9	19	0	0	0	0	0	32	0	0	0	0	0	0	0	0	16
ASV523	Bacteria	Acidobacteriota	Vicinamibacteria	Vicinamibacterales	norank_o__Vicinamibacterales	norank_f__norank_o__Vicinamibacterales	metagenome_g__norank_f__norank_o__Vicinamibacterales	0.721664	14	0	0	0	0	0	0	0	0	0	0	0	0	0	0	20	0	0	0	20	0	0	0	0	0	0	0	0	21	0	0	0	17	23	0	0	0	0	0	0	0
ASV1758	Bacteria	Acidobacteriota	Vicinamibacteria	Vicinamibacterales	norank_o__Vicinamibacterales	norank_f__norank_o__Vicinamibacterales	NA	0.999998	0	21	0	0	0	0	11	0	19	0	0	0	0	0	0	22	25	24	0	0	18	0	0	0	0	0	0	0	0	23	5	0	0	0	0	0	11	33	0	0	0
ASV555	Bacteria	Acidobacteriota	Vicinamibacteria	Vicinamibacterales	norank_o__Vicinamibacterales	norank_f__norank_o__Vicinamibacterales	Acidobacteria_bacterium_SCN_69-37	0.88161	13	7	0	0	0	0	13	11	14	0	0	0	6	0	0	42	18	0	0	11	14	0	0	10	0	0	0	19	0	26	9	0	8	14	0	16	0	13	5	8	0
ASV1081	Bacteria	Acidobacteriota	Vicinamibacteria	Vicinamibacterales	norank_o__Vicinamibacterales	norank_f__norank_o__Vicinamibacterales	NA	0.999983	6	0	0	0	0	0	0	6	0	0	0	0	8	0	0	0	0	0	0	0	0	0	0	13	0	0	0	0	0	0	0	0	7	0	0	0	0	18	0	0	0
ASV753	Bacteria	Acidobacteriota	Vicinamibacteria	Vicinamibacterales	norank_o__Vicinamibacterales	norank_f__norank_o__Vicinamibacterales	unclassified_g__norank_f__norank_o__Vicinamibacterales	0.719461	10	0	0	0	0	0	0	0	10	0	0	0	11	0	0	18	16	11	0	13	8	0	0	10	0	0	0	10	8	14	28	0	0	0	0	13	22	24	0	17	0
ASV463	Bacteria	Acidobacteriota	Vicinamibacteria	Vicinamibacterales	norank_o__Vicinamibacterales	norank_f__norank_o__Vicinamibacterales	unclassified_g__norank_f__norank_o__Vicinamibacterales	0.709189	15	7	0	0	0	0	12	9	14	0	0	0	19	0	0	31	19	18	0	22	24	0	0	16	0	0	0	0	10	0	12	0	10	0	0	12	37	25	12	12	0
ASV645	Bacteria	Acidobacteriota	Vicinamibacteria	Vicinamibacterales	norank_o__Vicinamibacterales	norank_f__norank_o__Vicinamibacterales	NA	0.999997	12	12	0	0	0	0	10	0	14	0	0	0	0	0	0	13	0	0	0	15	18	0	0	0	0	0	0	0	0	0	11	0	0	0	0	0	0	12	0	0	0
ASV967	Bacteria	Acidobacteriota	Vicinamibacteria	Vicinamibacterales	norank_o__Vicinamibacterales	norank_f__norank_o__Vicinamibacterales	NA	0.999984	7	19	0	0	0	0	12	0	0	0	0	0	14	0	0	18	14	8	0	8	11	0	0	0	0	0	0	0	8	7	0	0	7	0	0	5	18	20	11	0	0
ASV3127	Bacteria	Acidobacteriota	Vicinamibacteria	Vicinamibacterales	norank_o__Vicinamibacterales	norank_f__norank_o__Vicinamibacterales	unclassified_g__norank_f__norank_o__Vicinamibacterales	0.870386	0	0	32	29	25	0	0	0	0	28	13	27	0	21	18	0	0	0	39	0	0	18	11	11	27	23	13	4	0	0	0	57	0	0	0	0	0	0	0	0	32
ASV7631	Bacteria	Acidobacteriota	Vicinamibacteria	Vicinamibacterales	norank_o__Vicinamibacterales	norank_f__norank_o__Vicinamibacterales	unclassified_g__norank_f__norank_o__Vicinamibacterales	0.887968	0	0	0	0	0	0	0	0	27	0	0	0	0	0	0	23	16	0	0	0	15	0	0	0	0	0	0	0	0	0	0	0	0	15	0	0	11	18	0	0	0
ASV519	Bacteria	Acidobacteriota	Vicinamibacteria	Vicinamibacterales	norank_o__Vicinamibacterales	norank_f__norank_o__Vicinamibacterales	NA	0.999978	14	11	0	0	0	0	0	0	9	0	0	0	14	0	0	14	22	8	0	0	7	0	0	12	0	0	0	0	0	7	4	0	0	0	0	0	17	8	0	0	0
ASV3304	Bacteria	Acidobacteriota	Vicinamibacteria	Vicinamibacterales	norank_o__Vicinamibacterales	norank_f__norank_o__Vicinamibacterales	NA	0.999981	0	0	21	0	13	0	0	0	0	4	0	6	3	16	16	6	5	4	36	0	0	10	16	9	9	13	0	0	0	0	9	16	0	0	0	6	7	0	0	4	15
ASV2146	Bacteria	Acidobacteriota	Vicinamibacteria	Vicinamibacterales	norank_o__Vicinamibacterales	norank_f__norank_o__Vicinamibacterales	NA	0.999977	0	10	0	0	0	0	14	0	0	0	0	0	0	0	0	0	0	0	0	0	0	0	0	0	0	0	0	6	0	10	0	0	0	0	0	0	14	13	0	0	0
ASV3226	Bacteria	Acidobacteriota	Vicinamibacteria	Vicinamibacterales	norank_o__Vicinamibacterales	norank_f__norank_o__Vicinamibacterales	metagenome_g__norank_f__norank_o__Vicinamibacterales	0.970552	0	0	25	45	20	0	0	0	0	13	18	20	0	30	17	0	0	0	46	0	0	19	0	0	27	0	9	0	0	0	16	71	0	0	0	0	0	0	0	0	39
ASV10154	Bacteria	Acidobacteriota	Vicinamibacteria	Vicinamibacterales	norank_o__Vicinamibacterales	norank_f__norank_o__Vicinamibacterales	metagenome_g__norank_f__norank_o__Vicinamibacterales	0.974464	0	0	0	0	0	0	0	0	0	0	0	0	0	0	0	24	29	0	0	12	0	0	0	0	0	0	0	0	0	0	0	0	0	0	0	0	0	20	0	0	0
ASV1727	Bacteria	Acidobacteriota	Vicinamibacteria	Vicinamibacterales	norank_o__Vicinamibacterales	norank_f__norank_o__Vicinamibacterales	metagenome_g__norank_f__norank_o__Vicinamibacterales	0.972963	0	22	12	0	4	0	20	8	8	0	0	11	7	0	0	9	9	13	0	8	23	0	0	0	8	14	0	0	0	25	0	0	0	9	0	0	51	44	0	0	0
ASV576	Bacteria	Acidobacteriota	Vicinamibacteria	Vicinamibacterales	norank_o__Vicinamibacterales	norank_f__norank_o__Vicinamibacterales	NA	0.991817	13	17	11	0	5	0	16	16	15	0	0	11	19	4	0	38	21	26	14	27	29	17	0	40	8	0	0	22	16	26	30	0	0	0	4	0	42	34	0	0	4
ASV530	Bacteria	Acidobacteriota	Vicinamibacteria	Vicinamibacterales	norank_o__Vicinamibacterales	norank_f__norank_o__Vicinamibacterales	NA	0.989212	14	0	0	0	0	0	0	0	0	0	0	0	0	0	0	0	0	13	0	0	0	0	0	0	0	0	0	0	11	0	0	0	21	0	0	0	0	35	13	0	0
ASV1814	Bacteria	Acidobacteriota	Vicinamibacteria	Vicinamibacterales	norank_o__Vicinamibacterales	norank_f__norank_o__Vicinamibacterales	NA	0.992055	0	18	0	0	0	6	24	16	26	0	0	0	17	0	0	31	17	0	0	28	21	0	0	18	0	0	0	10	0	17	23	0	0	0	4	17	30	18	0	0	0
ASV3953	Bacteria	Acidobacteriota	Vicinamibacteria	Vicinamibacterales	norank_o__Vicinamibacterales	norank_f__norank_o__Vicinamibacterales	NA	0.980899	0	0	8	9	23	0	0	0	0	10	15	13	0	7	9	0	0	0	20	0	0	18	10	0	4	5	0	0	0	0	0	0	0	0	0	0	0	0	0	0	8
ASV3896	Bacteria	Acidobacteriota	Vicinamibacteria	Vicinamibacterales	norank_o__Vicinamibacterales	norank_f__norank_o__Vicinamibacterales	NA	0.982455	0	0	9	10	21	0	0	0	0	16	5	7	0	13	7	0	0	0	21	0	0	20	0	0	0	10	9	0	0	0	0	0	0	0	0	0	0	0	0	0	9
ASV5571	Bacteria	Acidobacteriota	Vicinamibacteria	Vicinamibacterales	norank_o__Vicinamibacterales	norank_f__norank_o__Vicinamibacterales	NA	0.99791	0	0	0	0	25	0	0	0	0	0	15	20	0	15	0	0	0	0	20	0	0	22	0	0	12	15	7	0	0	0	0	21	0	0	0	0	0	0	0	0	0
ASV336	Bacteria	Acidobacteriota	Vicinamibacteria	Vicinamibacterales	norank_o__Vicinamibacterales	norank_f__norank_o__Vicinamibacterales	NA	0.996737	19	0	30	27	33	0	0	30	0	24	0	19	30	33	18	31	0	37	33	26	18	23	24	44	12	8	13	0	0	0	24	11	24	0	0	40	28	32	13	0	34
ASV1659	Bacteria	Acidobacteriota	Vicinamibacteria	Vicinamibacterales	norank_o__Vicinamibacterales	norank_f__norank_o__Vicinamibacterales	NA	0.996828	0	28	0	0	0	11	17	0	36	0	0	0	0	0	0	0	20	0	0	20	21	0	0	0	0	0	0	38	24	33	17	0	0	0	11	0	29	19	0	19	0
ASV187	Bacteria	Acidobacteriota	Vicinamibacteria	Vicinamibacterales	norank_o__Vicinamibacterales	norank_f__norank_o__Vicinamibacterales	NA	0.996476	26	15	0	7	0	13	12	0	27	0	0	21	0	0	0	22	27	29	0	27	28	0	0	27	0	11	0	29	14	33	51	12	16	27	0	0	18	35	13	16	0
ASV1839	Bacteria	Acidobacteriota	Vicinamibacteria	Vicinamibacterales	norank_o__Vicinamibacterales	norank_f__norank_o__Vicinamibacterales	NA	0.999524	0	17	0	0	0	4	0	12	0	0	0	0	0	0	0	0	0	18	0	15	7	0	0	0	0	0	0	0	0	10	0	0	0	0	0	0	0	0	0	0	0
ASV4698	Bacteria	Acidobacteriota	Vicinamibacteria	Vicinamibacterales	norank_o__Vicinamibacterales	norank_f__norank_o__Vicinamibacterales	NA	0.9999	0	0	0	22	17	0	0	0	0	0	0	0	0	0	0	0	0	0	27	0	0	0	0	0	0	0	0	0	0	0	0	0	0	0	0	0	0	0	0	0	0
ASV3245	Bacteria	Acidobacteriota	Vicinamibacteria	Vicinamibacterales	norank_o__Vicinamibacterales	norank_f__norank_o__Vicinamibacterales	NA	0.999949	0	0	24	15	11	0	0	0	0	15	0	0	0	24	16	0	0	0	13	0	0	29	17	0	12	0	8	0	0	0	0	24	0	0	0	0	0	0	0	0	20
ASV10769	Bacteria	Acidobacteriota	Vicinamibacteria	Vicinamibacterales	norank_o__Vicinamibacterales	norank_f__norank_o__Vicinamibacterales	NA	0.999998	0	0	0	0	0	0	0	0	0	0	0	0	0	0	0	0	25	0	0	0	0	0	0	22	0	0	0	0	0	0	23	0	0	0	0	0	0	0	0	0	0
ASV10208	Bacteria	Acidobacteriota	Vicinamibacteria	Vicinamibacterales	norank_o__Vicinamibacterales	norank_f__norank_o__Vicinamibacterales	NA	0.99999	0	0	0	0	0	0	0	0	0	0	0	0	0	0	0	16	0	11	0	0	0	0	0	0	0	0	0	0	13	0	0	0	0	0	0	0	0	11	0	0	0
ASV306	Bacteria	Acidobacteriota	Vicinamibacteria	Vicinamibacterales	norank_o__Vicinamibacterales	norank_f__norank_o__Vicinamibacterales	NA	0.999997	21	0	16	18	14	0	0	0	0	16	0	18	0	0	0	27	17	11	8	0	17	19	0	0	16	0	0	0	0	21	22	0	0	0	0	0	0	22	0	0	18
ASV3530	Bacteria	Acidobacteriota	Vicinamibacteria	Vicinamibacterales	norank_o__Vicinamibacterales	norank_f__norank_o__Vicinamibacterales	NA	0.999995	0	0	15	0	0	0	0	0	0	0	0	0	0	20	0	0	0	0	30	0	0	0	23	0	0	0	0	0	0	0	0	0	0	0	0	0	0	0	0	0	0
ASV3271	Bacteria	Acidobacteriota	Vicinamibacteria	Vicinamibacterales	norank_o__Vicinamibacterales	norank_f__norank_o__Vicinamibacterales	NA	0.999998	0	0	23	0	0	0	0	0	0	0	0	0	0	16	38	0	0	0	14	0	0	0	0	0	14	0	0	0	0	0	0	0	0	0	0	0	0	0	0	0	18
ASV3576	Bacteria	Acidobacteriota	Vicinamibacteria	Vicinamibacterales	norank_o__Vicinamibacterales	norank_f__norank_o__Vicinamibacterales	NA	0.999998	0	0	14	24	10	0	0	0	0	11	0	18	0	0	0	0	0	0	23	0	0	17	0	0	0	21	0	0	0	0	0	0	0	0	0	0	0	0	0	0	0
ASV680	Bacteria	Acidobacteriota	Vicinamibacteria	Vicinamibacterales	norank_o__Vicinamibacterales	norank_f__norank_o__Vicinamibacterales	NA	0.999998	11	21	0	0	0	0	11	0	15	0	0	0	0	0	0	15	18	0	0	0	19	0	0	0	0	0	0	0	0	0	16	0	0	0	0	0	14	17	0	20	0
ASV1653	Bacteria	Acidobacteriota	Vicinamibacteria	Vicinamibacterales	norank_o__Vicinamibacterales	norank_f__norank_o__Vicinamibacterales	NA	0.999998	0	29	0	0	0	0	38	42	51	0	0	0	43	0	0	54	23	47	0	30	31	0	0	0	0	0	0	39	43	31	50	0	25	0	0	43	61	52	51	0	0
ASV2103	Bacteria	Acidobacteriota	Vicinamibacteria	Vicinamibacterales	norank_o__Vicinamibacterales	norank_f__norank_o__Vicinamibacterales	NA	0.999999	0	11	17	11	9	0	0	0	0	12	0	11	0	13	0	0	0	14	35	9	8	0	13	17	0	0	0	0	0	15	0	9	0	0	0	0	0	17	0	0	0
ASV3270	Bacteria	Acidobacteriota	Vicinamibacteria	Vicinamibacterales	norank_o__Vicinamibacterales	norank_f__norank_o__Vicinamibacterales	NA	0.999998	0	0	23	21	12	0	0	0	0	0	0	0	0	16	0	0	0	0	0	0	0	20	20	0	0	0	0	0	0	0	0	0	0	0	0	0	0	0	0	0	0
ASV3067	Bacteria	Acidobacteriota	Vicinamibacteria	Vicinamibacterales	norank_o__Vicinamibacterales	norank_f__norank_o__Vicinamibacterales	NA	0.999999	0	0	39	25	29	0	0	0	0	24	0	19	0	0	45	0	0	0	71	0	0	25	21	0	37	18	33	0	0	0	0	34	0	0	0	0	0	0	0	0	41
ASV124	Bacteria	Acidobacteriota	Vicinamibacteria	Vicinamibacterales	norank_o__Vicinamibacterales	norank_f__norank_o__Vicinamibacterales	NA	1	31	22	0	0	0	0	0	0	0	0	0	0	0	0	0	35	18	0	0	17	26	0	0	0	0	0	0	0	0	0	0	0	0	0	0	0	25	26	0	0	0
ASV15872	Bacteria	Acidobacteriota	Vicinamibacteria	Vicinamibacterales	norank_o__Vicinamibacterales	norank_f__norank_o__Vicinamibacterales	NA	0.999998	0	0	0	0	0	0	0	0	0	0	0	0	0	0	0	0	0	0	0	0	0	0	0	0	0	0	0	0	0	0	0	0	0	0	0	0	0	0	0	0	0
ASV105	Bacteria	Acidobacteriota	Vicinamibacteria	Vicinamibacterales	norank_o__Vicinamibacterales	norank_f__norank_o__Vicinamibacterales	NA	0.999997	33	0	0	0	0	34	35	0	37	0	0	0	41	0	0	44	39	0	0	37	40	0	0	48	0	0	0	40	22	32	44	0	0	0	24	27	0	61	0	40	0
ASV623	Bacteria	Acidobacteriota	Vicinamibacteria	Vicinamibacterales	norank_o__Vicinamibacterales	norank_f__norank_o__Vicinamibacterales	NA	0.999999	12	0	15	7	0	0	12	0	0	0	0	0	13	0	0	14	0	0	18	0	0	0	0	11	0	0	0	0	0	0	7	0	0	0	0	0	0	0	0	0	0
ASV3182	Bacteria	Acidobacteriota	Vicinamibacteria	Vicinamibacterales	norank_o__Vicinamibacterales	norank_f__norank_o__Vicinamibacterales	NA	0.999999	0	0	28	0	23	0	0	0	0	0	0	0	0	20	0	0	0	0	61	0	0	0	20	0	0	0	0	0	0	0	0	0	0	0	0	0	0	0	0	0	0
ASV3096	Bacteria	Acidobacteriota	Vicinamibacteria	Vicinamibacterales	norank_o__Vicinamibacterales	norank_f__norank_o__Vicinamibacterales	NA	0.999999	0	0	36	82	0	0	0	0	0	54	0	38	0	0	0	0	0	0	39	0	0	52	59	0	0	0	0	0	0	0	0	0	0	0	0	0	0	0	0	0	0
ASV3016	Bacteria	Acidobacteriota	Vicinamibacteria	Vicinamibacterales	norank_o__Vicinamibacterales	norank_f__norank_o__Vicinamibacterales	NA	0.999999	0	0	55	0	45	0	0	31	0	0	56	41	0	35	44	22	0	29	47	23	23	35	0	18	46	60	0	0	0	28	23	62	26	38	0	0	0	33	0	26	60
ASV3407	Bacteria	Acidobacteriota	Vicinamibacteria	Vicinamibacterales	norank_o__Vicinamibacterales	norank_f__norank_o__Vicinamibacterales	NA	0.999999	0	0	18	0	0	0	0	0	0	0	0	30	0	0	0	0	0	0	20	0	0	0	0	0	0	0	0	0	0	0	0	0	0	0	0	0	0	0	0	0	0
ASV1948	Bacteria	Acidobacteriota	Vicinamibacteria	Vicinamibacterales	norank_o__Vicinamibacterales	norank_f__norank_o__Vicinamibacterales	NA	0.999999	0	14	0	0	0	0	4	0	8	0	0	0	0	0	0	24	14	16	0	6	15	0	0	10	0	0	0	6	0	12	7	0	0	0	0	0	19	11	0	9	0
ASV3129	Bacteria	Acidobacteriota	Vicinamibacteria	Vicinamibacterales	norank_o__Vicinamibacterales	norank_f__norank_o__Vicinamibacterales	NA	0.999994	0	0	32	27	31	0	0	0	0	12	0	0	0	18	0	0	0	0	68	0	0	22	27	9	30	26	0	0	0	0	0	30	0	0	0	0	0	0	0	0	0
ASV3548	Bacteria	Acidobacteriota	Vicinamibacteria	Vicinamibacterales	norank_o__Vicinamibacterales	norank_f__norank_o__Vicinamibacterales	NA	0.999993	0	0	15	17	0	0	0	0	0	0	0	41	0	0	24	0	0	0	15	0	0	29	0	0	18	11	8	0	0	0	0	0	0	0	0	0	0	0	0	0	26
ASV3363	Bacteria	Acidobacteriota	Vicinamibacteria	Vicinamibacterales	norank_o__Vicinamibacterales	norank_f__norank_o__Vicinamibacterales	NA	0.999967	0	0	19	26	29	0	0	0	0	16	8	28	0	15	13	0	0	0	25	0	0	37	20	0	12	15	5	0	0	0	0	24	0	0	0	0	0	0	0	0	21
ASV479	Bacteria	Acidobacteriota	Vicinamibacteria	Vicinamibacterales	norank_o__Vicinamibacterales	norank_f__norank_o__Vicinamibacterales	NA	0.999962	15	9	0	0	0	0	0	0	11	0	0	0	0	0	0	31	15	0	0	18	15	0	0	0	0	0	0	0	0	12	16	0	5	0	0	0	22	9	10	13	0
ASV3154	Bacteria	Acidobacteriota	Vicinamibacteria	Vicinamibacterales	norank_o__Vicinamibacterales	norank_f__norank_o__Vicinamibacterales	NA	0.999942	0	0	30	16	17	0	0	6	0	12	8	7	0	16	10	9	5	0	26	7	11	12	18	8	16	14	4	0	0	0	0	22	0	0	0	0	0	11	0	0	26
ASV2214	Bacteria	Acidobacteriota	Vicinamibacteria	Vicinamibacterales	norank_o__Vicinamibacterales	norank_f__norank_o__Vicinamibacterales	NA	0.999935	0	9	0	0	0	0	22	7	0	0	0	0	18	0	0	15	0	12	5	26	15	0	0	16	0	0	0	16	26	10	14	0	8	0	0	16	14	30	14	0	0
ASV488	Bacteria	Acidobacteriota	Vicinamibacteria	Vicinamibacterales	norank_o__Vicinamibacterales	norank_f__norank_o__Vicinamibacterales	NA	0.999969	15	0	0	0	0	0	0	18	13	0	0	0	0	0	0	26	21	11	0	11	0	0	0	0	0	0	0	0	0	10	0	0	5	0	0	0	12	24	0	0	0
ASV316	Bacteria	Acidobacteriota	Vicinamibacteria	Vicinamibacterales	norank_o__Vicinamibacterales	norank_f__norank_o__Vicinamibacterales	NA	0.999995	20	29	0	0	0	11	0	0	39	0	0	0	25	0	0	28	29	18	0	24	0	0	0	26	0	0	0	35	35	26	53	0	19	0	0	27	23	29	17	30	0
ASV3582	Bacteria	Acidobacteriota	Vicinamibacteria	Vicinamibacterales	norank_o__Vicinamibacterales	norank_f__norank_o__Vicinamibacterales	NA	0.999998	0	0	14	0	22	0	0	0	0	0	0	0	0	0	0	0	0	0	19	0	0	0	25	0	0	16	0	0	0	0	0	0	0	0	0	0	0	0	0	0	0
ASV6722	Bacteria	Acidobacteriota	Vicinamibacteria	Vicinamibacterales	norank_o__Vicinamibacterales	norank_f__norank_o__Vicinamibacterales	NA	0.999997	0	0	0	0	0	0	16	25	0	0	0	0	0	0	0	18	21	0	0	0	0	0	0	0	0	0	0	0	0	0	0	0	0	0	0	0	0	40	0	0	0
ASV3044	Bacteria	Acidobacteriota	Vicinamibacteria	Vicinamibacterales	norank_o__Vicinamibacterales	norank_f__norank_o__Vicinamibacterales	NA	0.999998	0	0	45	49	55	0	0	0	0	0	0	37	0	59	49	0	0	0	60	0	0	40	39	0	0	0	0	0	0	0	0	57	0	0	0	0	0	0	0	0	43
ASV3303	Bacteria	Acidobacteriota	Vicinamibacteria	Vicinamibacterales	norank_o__Vicinamibacterales	norank_f__norank_o__Vicinamibacterales	uncultured_Acidobacterium_sp._g__norank_f__norank_o__Vicinamibacterales	0.810506	0	0	21	22	25	0	0	0	0	13	0	25	0	16	13	0	0	0	29	0	0	30	13	0	23	19	19	0	0	0	0	44	0	0	0	0	0	0	0	0	21
ASV302	Bacteria	Acidobacteriota	Vicinamibacteria	Vicinamibacterales	norank_o__Vicinamibacterales	norank_f__norank_o__Vicinamibacterales	uncultivated_soil_bacterium_clone_C112	0.765937	21	15	15	23	0	0	0	0	0	41	41	18	0	21	9	27	0	28	17	25	30	22	10	0	32	25	0	0	0	0	0	24	0	10	0	0	21	0	0	0	20
ASV3772	Bacteria	Acidobacteriota	Vicinamibacteria	Vicinamibacterales	norank_o__Vicinamibacterales	norank_f__norank_o__Vicinamibacterales	NA	0.999991	0	0	10	10	10	0	0	0	0	16	0	19	0	10	8	0	0	0	24	0	0	21	7	0	8	13	0	0	0	0	0	7	0	0	0	0	0	0	0	0	15
ASV3397	Bacteria	Acidobacteriota	Vicinamibacteria	Vicinamibacterales	norank_o__Vicinamibacterales	norank_f__norank_o__Vicinamibacterales	NA	0.999871	0	0	18	19	19	0	0	0	0	11	0	18	0	0	12	0	0	0	28	0	0	19	13	0	13	19	0	0	0	0	0	15	0	0	0	0	0	0	0	0	10
ASV3069	Bacteria	Acidobacteriota	Vicinamibacteria	Vicinamibacterales	norank_o__Vicinamibacterales	norank_f__norank_o__Vicinamibacterales	NA	0.999913	0	0	39	23	28	0	0	0	0	16	12	17	0	26	13	0	0	0	64	0	0	26	25	0	35	26	0	0	0	0	0	0	0	0	0	0	0	0	0	0	22
ASV819	Bacteria	Acidobacteriota	Vicinamibacteria	Vicinamibacterales	norank_o__Vicinamibacterales	norank_f__norank_o__Vicinamibacterales	NA	0.999986	9	8	0	0	0	0	0	9	8	0	0	0	8	0	0	7	0	8	0	14	13	0	0	6	0	0	0	0	0	7	6	0	0	5	0	0	24	13	0	0	0
ASV3400	Bacteria	Acidobacteriota	Vicinamibacteria	Vicinamibacterales	norank_o__Vicinamibacterales	norank_f__norank_o__Vicinamibacterales	NA	0.999998	0	0	18	10	9	0	0	0	0	0	0	10	0	0	6	0	0	0	13	0	0	12	16	0	0	7	0	0	0	0	0	7	0	0	0	0	0	0	0	0	0
ASV480	Bacteria	Acidobacteriota	Vicinamibacteria	Vicinamibacterales	norank_o__Vicinamibacterales	norank_f__norank_o__Vicinamibacterales	NA	0.999991	15	0	0	0	0	0	0	10	17	0	0	0	0	0	0	19	12	8	0	0	0	0	0	7	0	0	0	0	17	0	22	0	0	0	0	15	0	0	0	11	0
ASV288	Bacteria	Acidobacteriota	Vicinamibacteria	Vicinamibacterales	norank_o__Vicinamibacterales	norank_f__norank_o__Vicinamibacterales	NA	0.999994	21	45	0	0	0	0	26	0	46	0	0	0	22	0	0	49	46	25	0	33	48	0	0	30	0	0	0	15	0	59	44	0	21	15	0	27	59	76	19	27	0
ASV3019	Bacteria	Acidobacteriota	Vicinamibacteria	Vicinamibacterales	norank_o__Vicinamibacterales	norank_f__norank_o__Vicinamibacterales	NA	0.999987	0	0	54	16	23	0	0	0	0	9	10	7	0	15	8	0	0	0	64	0	0	0	37	0	20	17	0	0	0	0	0	14	0	0	0	0	0	0	0	0	10
ASV2322	Bacteria	Acidobacteriota	Vicinamibacteria	Vicinamibacterales	norank_o__Vicinamibacterales	norank_f__norank_o__Vicinamibacterales	NA	0.999987	0	8	16	16	6	0	8	0	6	11	0	0	13	0	11	16	19	0	18	0	0	0	7	13	12	0	0	10	0	0	14	0	0	0	0	0	11	16	19	0	0
ASV482	Bacteria	Acidobacteriota	Vicinamibacteria	Vicinamibacterales	norank_o__Vicinamibacterales	norank_f__norank_o__Vicinamibacterales	NA	0.999998	15	14	0	0	0	0	16	13	20	0	0	0	8	0	0	22	29	12	0	27	22	0	0	12	0	0	0	23	0	23	22	0	0	0	0	15	20	32	0	0	0
ASV6408	Bacteria	Acidobacteriota	Vicinamibacteria	Vicinamibacterales	norank_o__Vicinamibacterales	norank_f__norank_o__Vicinamibacterales	NA	0.999997	0	0	0	0	0	16	0	20	0	0	0	0	23	0	0	24	0	26	0	39	20	0	0	17	0	0	0	0	20	0	16	0	0	33	0	27	34	24	23	0	0
ASV127	Bacteria	Acidobacteriota	Vicinamibacteria	Vicinamibacterales	norank_o__Vicinamibacterales	norank_f__norank_o__Vicinamibacterales	NA	0.999999	30	22	0	0	0	0	34	15	36	0	0	0	0	0	0	28	39	0	0	24	21	0	0	18	0	0	0	0	0	24	27	0	29	0	0	0	24	39	0	34	0
ASV739	Bacteria	Acidobacteriota	Vicinamibacteria	Vicinamibacterales	norank_o__Vicinamibacterales	norank_f__norank_o__Vicinamibacterales	NA	0.999998	10	0	0	0	0	0	0	0	0	0	0	0	0	0	0	0	0	0	0	0	0	0	0	0	0	0	0	0	0	0	11	0	10	0	0	0	9	17	0	0	0
ASV169	Bacteria	Acidobacteriota	Vicinamibacteria	Vicinamibacterales	norank_o__Vicinamibacterales	norank_f__norank_o__Vicinamibacterales	NA	0.999999	27	15	0	0	0	15	8	19	9	0	0	0	8	0	0	29	14	12	0	17	20	0	0	11	0	0	0	12	0	0	20	0	13	0	0	13	29	28	19	5	0
ASV2181	Bacteria	Acidobacteriota	Vicinamibacteria	Vicinamibacterales	norank_o__Vicinamibacterales	norank_f__norank_o__Vicinamibacterales	NA	0.999934	0	10	0	0	0	0	0	0	0	0	0	0	0	0	0	0	12	18	0	19	15	0	0	20	0	0	0	0	18	0	0	0	0	0	0	0	17	34	0	0	0
ASV634	Bacteria	Acidobacteriota	Vicinamibacteria	Vicinamibacterales	norank_o__Vicinamibacterales	norank_f__norank_o__Vicinamibacterales	NA	0.999997	12	28	0	0	0	6	9	7	19	0	0	0	6	0	0	14	7	17	0	14	14	0	0	24	0	0	0	6	8	13	13	0	7	0	0	15	27	21	8	9	0
ASV3666	Bacteria	Acidobacteriota	Vicinamibacteria	Vicinamibacterales	norank_o__Vicinamibacterales	norank_f__norank_o__Vicinamibacterales	NA	0.99997	0	0	12	14	25	0	0	0	0	13	0	9	0	23	12	0	0	0	25	0	0	9	11	16	16	5	11	12	0	0	0	0	0	0	0	20	0	0	0	7	9
ASV400	Bacteria	Acidobacteriota	Vicinamibacteria	Vicinamibacterales	norank_o__Vicinamibacterales	norank_f__norank_o__Vicinamibacterales	NA	0.999732	17	23	18	12	30	13	5	11	17	14	0	14	13	17	14	22	28	9	28	21	27	24	7	46	13	10	4	23	10	27	17	17	12	0	21	47	13	19	0	0	19
ASV3524	Bacteria	Acidobacteriota	Vicinamibacteria	Vicinamibacterales	norank_o__Vicinamibacterales	norank_f__norank_o__Vicinamibacterales	NA	0.999989	0	0	15	20	21	0	0	0	0	0	0	25	0	13	0	0	0	0	15	0	0	19	16	0	0	10	9	0	0	0	0	22	0	0	0	0	0	0	0	0	17
ASV99	Bacteria	Acidobacteriota	Vicinamibacteria	Vicinamibacterales	norank_o__Vicinamibacterales	norank_f__norank_o__Vicinamibacterales	NA	0.999995	34	35	0	0	0	0	0	26	37	0	0	0	30	0	0	20	38	35	0	33	22	0	0	45	0	0	0	36	0	38	24	0	0	0	37	34	21	35	0	20	0
ASV16282	Bacteria	Acidobacteriota	Vicinamibacteria	Vicinamibacterales	norank_o__Vicinamibacterales	norank_f__norank_o__Vicinamibacterales	NA	0.999994	0	0	0	0	0	0	0	0	0	0	0	0	0	0	0	0	0	0	0	0	0	0	0	0	0	0	0	0	0	0	0	0	0	0	0	0	24	0	0	0	0
ASV3749	Bacteria	Acidobacteriota	Vicinamibacteria	Vicinamibacterales	norank_o__Vicinamibacterales	norank_f__norank_o__Vicinamibacterales	NA	0.999994	0	0	11	27	0	0	0	0	0	0	0	24	0	30	27	0	0	0	23	0	0	23	18	0	30	17	0	0	0	0	0	19	0	0	0	0	0	0	0	0	18
ASV10230	Bacteria	Acidobacteriota	Vicinamibacteria	Vicinamibacterales	norank_o__Vicinamibacterales	norank_f__norank_o__Vicinamibacterales	NA	0.999996	0	0	0	0	0	0	0	0	0	0	0	0	0	0	0	15	23	0	0	0	0	0	0	19	0	0	0	0	0	0	0	0	0	0	0	0	0	0	0	0	0
ASV4136	Bacteria	Acidobacteriota	Vicinamibacteria	Vicinamibacterales	norank_o__Vicinamibacterales	norank_f__norank_o__Vicinamibacterales	NA	0.999993	0	0	6	22	40	0	0	0	0	23	16	31	0	15	12	0	0	0	10	0	0	44	22	0	18	19	8	0	0	0	0	29	0	0	0	0	0	0	0	0	29
ASV528	Bacteria	Acidobacteriota	Vicinamibacteria	Vicinamibacterales	norank_o__Vicinamibacterales	norank_f__norank_o__Vicinamibacterales	NA	0.999928	14	6	0	0	0	0	6	9	7	0	0	0	0	0	0	19	21	0	0	9	19	0	0	19	0	0	0	11	6	14	14	0	0	0	10	15	10	5	14	0	0
ASV588	Bacteria	Acidobacteriota	Vicinamibacteria	Vicinamibacterales	norank_o__Vicinamibacterales	norank_f__norank_o__Vicinamibacterales	NA	0.999995	13	7	0	0	0	0	0	0	19	0	0	0	11	0	0	11	13	0	0	0	9	0	0	19	0	0	0	15	22	0	25	0	22	0	0	18	10	19	0	0	0
ASV368	Bacteria	Acidobacteriota	Vicinamibacteria	Vicinamibacterales	norank_o__Vicinamibacterales	norank_f__norank_o__Vicinamibacterales	NA	0.999993	18	0	0	0	0	0	9	20	14	0	0	0	0	0	0	18	11	16	0	22	15	0	0	0	0	0	0	0	0	9	12	0	0	0	0	0	16	14	15	9	0
ASV3478	Bacteria	Acidobacteriota	Vicinamibacteria	Vicinamibacterales	norank_o__Vicinamibacterales	norank_f__norank_o__Vicinamibacterales	NA	0.999995	0	0	16	28	32	0	0	0	0	0	21	59	0	24	14	0	0	0	22	0	0	32	0	0	19	17	17	0	0	0	0	28	0	0	0	0	0	0	0	0	21
ASV1783	Bacteria	Acidobacteriota	Vicinamibacteria	Vicinamibacterales	norank_o__Vicinamibacterales	norank_f__norank_o__Vicinamibacterales	NA	0.999996	0	19	0	0	0	0	10	0	29	0	0	0	0	0	0	23	29	14	0	6	17	0	0	19	0	0	0	11	11	17	17	0	5	32	0	8	13	24	0	6	0
ASV3652	Bacteria	Acidobacteriota	Vicinamibacteria	Vicinamibacterales	norank_o__Vicinamibacterales	norank_f__norank_o__Vicinamibacterales	NA	0.999969	0	0	12	12	18	0	0	0	0	0	0	4	0	8	12	0	0	0	29	0	0	19	9	0	9	0	0	0	0	0	0	11	0	0	0	0	0	0	0	0	0
ASV7650	Bacteria	Acidobacteriota	Vicinamibacteria	Vicinamibacterales	norank_o__Vicinamibacterales	norank_f__norank_o__Vicinamibacterales	NA	0.999972	0	0	0	0	0	0	0	0	21	0	0	0	17	0	0	25	15	10	0	0	0	0	0	25	0	0	0	20	0	0	22	0	0	0	0	0	0	18	0	0	0
ASV3263	Bacteria	Acidobacteriota	Vicinamibacteria	Vicinamibacterales	norank_o__Vicinamibacterales	norank_f__norank_o__Vicinamibacterales	NA	0.99998	0	0	23	12	17	0	0	0	0	15	0	11	0	19	20	0	0	0	39	0	0	18	12	0	0	0	16	0	0	0	0	13	0	0	0	0	0	0	0	0	20
ASV3684	Bacteria	Acidobacteriota	Vicinamibacteria	Vicinamibacterales	norank_o__Vicinamibacterales	norank_f__norank_o__Vicinamibacterales	NA	0.999962	0	0	12	16	9	0	0	0	0	0	19	21	0	11	12	0	10	0	11	0	0	13	0	16	0	0	0	0	0	13	15	21	0	0	0	0	0	7	0	0	10
ASV3228	Bacteria	Acidobacteriota	Vicinamibacteria	Vicinamibacterales	norank_o__Vicinamibacterales	norank_f__norank_o__Vicinamibacterales	NA	0.999974	0	0	25	23	16	0	0	0	0	17	0	28	0	0	11	0	0	0	36	0	0	14	0	0	19	23	0	0	0	0	0	0	0	0	0	0	0	0	0	0	20
ASV3117	Bacteria	Acidobacteriota	Vicinamibacteria	Vicinamibacterales	norank_o__Vicinamibacterales	norank_f__norank_o__Vicinamibacterales	NA	0.999963	0	0	33	24	25	0	0	0	0	16	0	28	0	15	25	0	0	0	25	0	0	39	21	0	17	24	0	0	0	0	0	16	0	0	0	0	0	0	0	0	17
ASV6370	Bacteria	Acidobacteriota	Vicinamibacteria	Vicinamibacterales	norank_o__Vicinamibacterales	norank_f__norank_o__Vicinamibacterales	NA	0.999969	0	0	0	0	0	24	0	0	22	0	0	0	0	0	0	0	16	0	0	0	11	0	0	0	0	0	0	0	0	0	0	0	0	0	0	0	19	22	0	16	0
ASV10295	Bacteria	Acidobacteriota	Vicinamibacteria	Vicinamibacterales	norank_o__Vicinamibacterales	norank_f__norank_o__Vicinamibacterales	NA	0.999972	0	0	0	0	0	0	0	0	0	0	0	0	0	0	0	11	0	14	0	27	0	0	0	16	0	0	0	0	0	0	10	0	26	0	0	0	0	0	0	0	0
ASV3181	Bacteria	Acidobacteriota	Vicinamibacteria	Vicinamibacterales	norank_o__Vicinamibacterales	norank_f__norank_o__Vicinamibacterales	NA	0.999973	0	0	28	0	0	0	0	0	0	0	0	29	0	0	0	0	0	0	25	0	0	36	0	0	0	40	0	0	0	0	0	0	0	0	0	0	0	0	0	0	0
ASV7830	Bacteria	Acidobacteriota	Vicinamibacteria	Vicinamibacterales	norank_o__Vicinamibacterales	norank_f__norank_o__Vicinamibacterales	NA	0.999926	0	0	0	0	0	0	0	0	7	0	0	0	0	0	0	0	10	0	0	0	5	0	0	17	0	0	0	17	0	13	0	0	0	0	0	22	0	18	0	0	0
ASV4663	Bacteria	Acidobacteriota	Vicinamibacteria	Vicinamibacterales	norank_o__Vicinamibacterales	norank_f__norank_o__Vicinamibacterales	NA	0.999966	0	0	0	27	39	0	0	0	0	29	20	26	0	21	0	0	0	0	21	0	0	0	0	0	25	0	17	0	0	0	0	33	0	0	0	0	0	0	0	0	36
ASV7731	Bacteria	Acidobacteriota	Vicinamibacteria	Vicinamibacterales	norank_o__Vicinamibacterales	norank_f__norank_o__Vicinamibacterales	NA	0.999981	0	0	0	0	0	0	0	0	12	0	0	0	0	0	0	10	0	0	0	0	0	0	0	0	0	0	0	0	0	0	8	0	0	0	0	0	0	0	0	0	0
ASV1956	Bacteria	Acidobacteriota	Vicinamibacteria	Vicinamibacterales	norank_o__Vicinamibacterales	norank_f__norank_o__Vicinamibacterales	NA	0.999869	0	14	0	0	0	0	8	0	0	0	0	0	0	0	0	16	0	7	0	0	11	0	0	0	0	0	0	0	5	0	0	0	0	9	0	0	12	0	0	13	0
ASV3081	Bacteria	Acidobacteriota	Vicinamibacteria	Vicinamibacterales	norank_o__Vicinamibacterales	norank_f__norank_o__Vicinamibacterales	NA	0.999966	0	0	37	43	22	0	0	0	0	25	23	10	0	16	18	0	0	0	23	0	0	14	20	15	16	13	0	0	0	0	0	37	0	0	0	0	0	0	0	0	21
ASV88	Bacteria	Acidobacteriota	Vicinamibacteria	Vicinamibacterales	norank_o__Vicinamibacterales	norank_f__norank_o__Vicinamibacterales	NA	0.99999	36	39	127	106	113	0	39	42	56	53	36	65	42	87	61	48	36	24	218	38	31	92	82	48	62	49	45	47	30	0	47	67	0	0	29	36	41	62	0	34	72
ASV3150	Bacteria	Acidobacteriota	Vicinamibacteria	Vicinamibacterales	norank_o__Vicinamibacterales	norank_f__norank_o__Vicinamibacterales	NA	0.999973	0	0	31	41	36	0	0	0	0	0	0	32	0	17	0	0	0	0	36	0	0	39	20	0	23	23	0	0	0	0	0	30	0	0	0	0	0	0	0	0	44
ASV4694	Bacteria	Acidobacteriota	Vicinamibacteria	Vicinamibacterales	norank_o__Vicinamibacterales	norank_f__norank_o__Vicinamibacterales	NA	0.999957	0	0	0	22	8	0	0	0	0	0	0	0	0	15	0	0	0	0	12	0	0	17	14	0	0	0	0	0	0	0	0	12	0	0	0	0	0	0	0	0	0
ASV3027	Bacteria	Acidobacteriota	Vicinamibacteria	Vicinamibacterales	norank_o__Vicinamibacterales	norank_f__norank_o__Vicinamibacterales	NA	0.999982	0	0	51	55	50	0	0	0	0	27	15	82	0	35	33	0	0	0	58	0	0	56	27	0	52	77	20	0	0	0	0	58	0	0	0	0	0	0	0	0	34
ASV805	Bacteria	Acidobacteriota	Vicinamibacteria	Vicinamibacterales	norank_o__Vicinamibacterales	norank_f__norank_o__Vicinamibacterales	NA	0.999965	9	0	0	0	0	0	0	0	0	0	0	0	0	0	0	21	8	15	0	22	14	0	0	22	0	0	0	0	0	10	0	0	0	0	0	0	12	19	0	0	0
ASV5591	Bacteria	Acidobacteriota	Vicinamibacteria	Vicinamibacterales	norank_o__Vicinamibacterales	norank_f__norank_o__Vicinamibacterales	NA	0.999982	0	0	0	0	23	0	0	0	0	0	0	0	0	0	0	0	0	0	8	0	0	0	0	0	0	0	0	13	0	0	24	0	0	0	0	0	0	0	0	0	18
ASV9480	Bacteria	Acidobacteriota	Vicinamibacteria	Vicinamibacterales	norank_o__Vicinamibacterales	norank_f__norank_o__Vicinamibacterales	NA	0.99995	0	0	0	0	0	0	0	0	0	0	0	0	0	22	16	0	0	0	0	0	0	20	0	0	0	0	0	0	0	0	0	26	0	0	0	0	0	0	0	0	0
ASV3157	Bacteria	Acidobacteriota	Vicinamibacteria	Vicinamibacterales	norank_o__Vicinamibacterales	norank_f__norank_o__Vicinamibacterales	NA	0.999945	0	0	30	28	0	0	0	0	0	0	0	19	0	0	0	0	0	0	27	0	0	0	0	0	25	13	0	0	0	0	0	0	0	0	0	0	0	0	0	0	0
ASV3786	Bacteria	Acidobacteriota	Vicinamibacteria	Vicinamibacterales	norank_o__Vicinamibacterales	norank_f__norank_o__Vicinamibacterales	NA	0.999893	0	0	10	14	13	0	0	0	0	8	0	7	0	6	0	0	0	0	20	0	0	7	0	0	14	26	0	0	0	0	0	14	0	0	0	0	0	0	0	0	11
ASV3056	Bacteria	Acidobacteriota	Vicinamibacteria	Vicinamibacterales	norank_o__Vicinamibacterales	norank_f__norank_o__Vicinamibacterales	NA	0.999944	0	0	41	22	34	0	0	0	0	28	26	0	0	26	24	0	0	0	36	0	0	25	40	0	24	18	0	0	0	0	0	39	0	0	0	0	0	0	0	0	13
ASV3541	Bacteria	Acidobacteriota	Vicinamibacteria	Vicinamibacterales	norank_o__Vicinamibacterales	norank_f__norank_o__Vicinamibacterales	NA	0.999977	0	0	15	0	0	0	0	0	0	19	0	17	0	9	12	0	0	0	16	0	0	22	0	0	13	18	0	0	0	0	0	14	0	0	0	0	0	0	0	0	13
ASV4943	Bacteria	Actinobacteriota	Thermoleophilia	Solirubrobacterales	Solirubrobacteraceae	Solirubrobacter	NA	0.945695	0	0	0	10	17	0	0	0	0	12	19	10	0	0	0	0	0	0	0	0	0	0	0	0	0	0	0	0	0	0	0	14	0	0	0	0	0	0	0	0	13
ASV3837	Bacteria	Actinobacteriota	Thermoleophilia	Solirubrobacterales	Solirubrobacteraceae	Conexibacter	NA	0.979123	0	0	9	25	0	0	19	0	0	0	0	24	0	0	10	10	13	6	10	0	0	23	9	0	10	10	10	0	8	5	0	0	0	8	0	0	12	9	0	0	0
ASV4828	Bacteria	Actinobacteriota	Thermoleophilia	Solirubrobacterales	Solirubrobacteraceae	Parviterribacter	uncultured_bacterium_g__Parviterribacter	0.993268	0	0	0	14	14	0	0	0	0	10	0	0	0	0	0	0	0	0	15	0	0	0	0	0	0	0	0	0	0	0	0	15	0	0	0	0	0	0	0	0	25
ASV3390	Bacteria	Actinobacteriota	Thermoleophilia	Solirubrobacterales	Solirubrobacteraceae	Parviterribacter	uncultured_bacterium_g__Parviterribacter	0.865516	0	0	18	11	38	0	0	0	0	28	0	36	0	22	17	0	0	0	27	0	0	35	26	0	21	22	28	0	0	0	0	24	0	0	0	0	0	0	0	0	56
ASV795	Bacteria	Actinobacteriota	Thermoleophilia	Solirubrobacterales	67-14	norank_f__67-14	uncultured_Rubrobacteria_bacterium_g__norank_f__67-14	0.734905	9	0	0	0	0	0	0	0	0	0	0	0	17	0	0	11	33	0	0	0	11	0	0	0	0	0	0	0	0	0	18	0	0	0	0	0	0	0	0	0	0
ASV5598	Bacteria	Actinobacteriota	Thermoleophilia	Solirubrobacterales	67-14	norank_f__67-14	NA	0.935946	0	0	0	0	22	0	0	0	0	0	0	0	0	0	0	0	0	0	0	0	0	24	34	0	0	0	0	0	0	0	0	0	0	0	0	0	0	0	0	0	0
ASV5702	Bacteria	Actinobacteriota	Thermoleophilia	Solirubrobacterales	67-14	norank_f__67-14	NA	0.966151	0	0	0	0	14	0	0	20	27	0	0	25	33	50	0	0	0	13	26	0	0	0	0	36	0	0	0	0	0	0	12	0	24	13	24	9	0	37	0	27	41
ASV3085	Bacteria	Actinobacteriota	Thermoleophilia	Solirubrobacterales	67-14	norank_f__67-14	uncultured_Solirubrobacter_sp._g__norank_f__67-14	0.836735	0	0	37	39	64	0	0	0	0	38	0	36	0	57	42	39	0	0	35	0	0	39	56	0	41	36	42	0	0	0	37	67	0	0	0	14	0	0	0	0	51
ASV3272	Bacteria	Actinobacteriota	Thermoleophilia	Solirubrobacterales	67-14	norank_f__67-14	uncultured_Solirubrobacter_sp._g__norank_f__67-14	0.841069	0	0	23	0	28	0	0	0	0	0	64	0	0	31	0	0	0	0	27	0	0	29	33	0	0	0	18	0	0	28	0	0	0	0	0	0	0	0	0	0	28
ASV458	Bacteria	Actinobacteriota	Thermoleophilia	Solirubrobacterales	67-14	norank_f__67-14	uncultured_Solirubrobacter_sp._g__norank_f__67-14	0.854108	16	0	0	0	0	25	33	0	0	0	0	0	0	0	0	0	0	0	0	0	31	0	0	0	0	0	0	31	34	0	0	0	0	0	0	0	31	0	0	0	0
ASV3062	Bacteria	Actinobacteriota	Thermoleophilia	Solirubrobacterales	67-14	norank_f__67-14	uncultured_Solirubrobacter_sp._g__norank_f__67-14	0.773446	0	0	41	44	91	0	0	0	0	41	24	40	0	105	40	0	0	0	66	0	0	72	58	0	0	27	55	0	0	0	0	43	0	0	0	0	0	0	0	0	77
ASV3143	Bacteria	Actinobacteriota	Thermoleophilia	Solirubrobacterales	67-14	norank_f__67-14	NA	0.913615	0	0	31	21	34	0	0	0	0	10	0	22	0	58	0	0	0	0	25	0	0	33	19	0	24	13	20	12	0	0	13	26	0	0	0	0	0	0	0	0	25
ASV3153	Bacteria	Actinobacteriota	Thermoleophilia	Solirubrobacterales	67-14	norank_f__67-14	NA	0.963998	0	0	30	18	68	0	0	0	0	19	12	30	0	42	12	0	0	0	34	0	0	44	38	0	36	16	31	0	0	0	0	28	0	0	0	0	0	0	0	0	29
ASV679	Bacteria	Actinobacteriota	Thermoleophilia	Solirubrobacterales	Solirubrobacteraceae	Solirubrobacter	uncultured_Conexibacter_sp._g__Solirubrobacter	0.771555	11	19	0	0	0	12	0	0	13	0	0	0	0	0	0	16	21	9	0	18	17	0	0	17	0	0	0	16	0	16	17	0	7	9	13	9	20	23	22	13	0
ASV4792	Bacteria	Actinobacteriota	Thermoleophilia	Solirubrobacterales	Solirubrobacteraceae	Solirubrobacter	uncultured_Conexibacter_sp._g__Solirubrobacter	0.84917	0	0	0	15	0	0	0	10	0	10	0	17	0	0	0	0	0	0	7	0	13	0	0	0	10	16	0	0	17	10	0	0	0	0	0	0	22	18	12	0	19
ASV707	Bacteria	Actinobacteriota	Thermoleophilia	Solirubrobacterales	Solirubrobacteraceae	norank_f__Solirubrobacteraceae	NA	0.968772	10	6	14	0	0	0	0	0	0	0	15	18	0	11	6	9	18	0	26	0	0	0	13	14	17	0	0	10	0	0	10	21	0	0	15	0	18	17	0	0	23
ASV3456	Bacteria	Actinobacteriota	Thermoleophilia	Solirubrobacterales	Solirubrobacteraceae	norank_f__Solirubrobacteraceae	NA	0.978986	0	0	17	0	0	0	0	0	0	0	0	0	0	0	18	0	0	0	0	0	18	0	0	0	0	0	0	0	0	0	0	0	0	0	0	0	11	0	0	0	0
ASV2188	Bacteria	Actinobacteriota	Thermoleophilia	Solirubrobacterales	Solirubrobacteraceae	norank_f__Solirubrobacteraceae	NA	0.99029	0	9	11	9	10	0	0	0	13	15	7	18	16	19	5	12	13	0	18	4	8	17	5	12	8	0	11	13	0	0	12	19	7	12	0	6	10	0	0	19	0
ASV10392	Bacteria	Actinobacteriota	Thermoleophilia	Solirubrobacterales	Solirubrobacteraceae	norank_f__Solirubrobacteraceae	NA	0.994827	0	0	0	0	0	0	0	0	0	0	0	0	0	0	0	8	0	0	0	0	0	0	0	0	0	0	0	0	11	0	0	0	0	0	0	0	0	18	18	0	0
ASV227	Bacteria	Actinobacteriota	Thermoleophilia	Solirubrobacterales	Solirubrobacteraceae	norank_f__Solirubrobacteraceae	NA	0.99692	24	17	0	10	16	0	0	28	0	27	13	19	0	0	0	0	0	14	0	12	19	0	8	23	17	0	30	20	0	17	12	33	0	8	0	0	29	0	39	0	0
ASV3884	Bacteria	Actinobacteriota	Thermoleophilia	Solirubrobacterales	Solirubrobacteraceae	norank_f__Solirubrobacteraceae	uncultured_Rubrobacteria_bacterium_g__norank_f__Solirubrobacteraceae	0.782915	0	0	9	13	16	0	0	0	0	0	0	12	0	17	5	0	0	0	6	0	0	17	14	0	0	14	0	0	0	0	0	0	0	0	0	0	0	0	0	0	16
ASV3108	Bacteria	Actinobacteriota	Thermoleophilia	Solirubrobacterales	67-14	norank_f__67-14	uncultured_actinobacterium_g__norank_f__67-14	0.729957	0	0	34	48	57	0	0	0	0	28	31	42	0	63	37	0	0	0	55	0	0	45	21	0	36	31	54	0	0	0	0	54	0	0	0	0	0	0	0	0	65
ASV3344	Bacteria	Actinobacteriota	Thermoleophilia	Solirubrobacterales	67-14	norank_f__67-14	NA	0.969949	0	0	20	13	28	0	0	0	0	18	0	12	0	23	0	0	0	0	32	0	0	16	0	0	0	11	24	0	0	0	0	18	0	0	0	0	0	0	0	0	22
ASV7414	Bacteria	Actinobacteriota	Thermoleophilia	Solirubrobacterales	67-14	norank_f__67-14	NA	0.948475	0	0	0	0	0	0	0	12	0	0	0	0	47	0	0	0	0	0	0	0	15	0	0	0	0	0	0	14	0	0	26	0	0	0	24	19	12	0	0	17	0
ASV10164	Bacteria	Actinobacteriota	Thermoleophilia	Solirubrobacterales	67-14	norank_f__67-14	uncultured_actinobacterium_g__norank_f__67-14	0.797085	0	0	0	0	0	0	0	0	0	0	0	0	0	0	0	23	14	15	40	0	0	20	0	0	0	0	0	0	0	0	0	0	22	0	0	0	0	0	19	0	0
ASV440	Bacteria	Actinobacteriota	Thermoleophilia	Solirubrobacterales	67-14	norank_f__67-14	uncultured_actinobacterium_g__norank_f__67-14	0.822917	16	11	0	0	11	17	15	0	13	0	0	0	13	13	0	18	11	0	10	0	13	0	0	10	0	0	0	13	11	16	10	0	0	6	12	0	13	0	0	7	0
ASV3176	Bacteria	Actinobacteriota	Thermoleophilia	Solirubrobacterales	67-14	norank_f__67-14	uncultured_actinobacterium_g__norank_f__67-14	0.777956	0	0	28	13	16	0	0	0	0	0	0	25	0	24	9	0	0	0	20	0	0	12	12	0	9	5	0	0	0	0	0	22	0	0	0	0	0	0	0	0	29
ASV636	Bacteria	Actinobacteriota	Thermoleophilia	Solirubrobacterales	67-14	norank_f__67-14	uncultured_bacterium_g__norank_f__67-14	0.791767	12	0	0	0	0	0	0	17	0	0	0	0	19	0	0	0	0	0	0	0	16	0	0	0	0	0	0	5	16	0	0	0	0	0	0	0	0	0	0	4	0
ASV237	Bacteria	Actinobacteriota	Thermoleophilia	Solirubrobacterales	67-14	norank_f__67-14	metagenome_g__norank_f__67-14	0.764592	23	21	0	0	0	20	29	21	23	0	0	0	26	0	0	35	25	13	0	16	21	0	0	19	0	0	0	21	23	24	36	0	24	14	29	29	35	30	16	21	0
ASV1909	Bacteria	Actinobacteriota	Thermoleophilia	Solirubrobacterales	67-14	norank_f__67-14	NA	0.999016	0	15	0	0	0	21	53	15	0	0	0	0	0	0	0	32	41	0	0	0	19	0	0	0	0	0	0	0	0	0	0	0	0	0	0	0	20	0	0	0	0
ASV16549	Bacteria	Actinobacteriota	Thermoleophilia	Solirubrobacterales	67-14	norank_f__67-14	NA	0.998687	0	0	0	0	0	0	0	0	0	0	0	0	0	0	0	0	0	0	0	0	0	0	0	0	0	0	0	0	0	0	0	0	0	0	0	0	0	31	0	0	0
ASV303	Bacteria	Actinobacteriota	Thermoleophilia	Solirubrobacterales	67-14	norank_f__67-14	NA	0.99958	21	0	0	0	0	20	0	0	13	0	0	0	15	0	0	0	10	22	0	0	0	0	0	22	0	0	0	42	0	0	103	0	30	0	44	6	0	0	0	34	0
ASV13040	Bacteria	Actinobacteriota	Thermoleophilia	Solirubrobacterales	67-14	norank_f__67-14	uncultured_Rubrobacteraceae_bacterium_g__norank_f__67-14	0.701586	0	0	0	0	0	0	0	0	0	0	0	0	0	0	0	0	0	0	0	0	0	0	0	19	0	0	0	0	0	0	29	0	0	0	0	0	0	0	0	0	0
ASV7362	Bacteria	Actinobacteriota	Thermoleophilia	Solirubrobacterales	67-14	norank_f__67-14	NA	0.999666	0	0	0	0	0	0	0	44	0	0	0	0	0	0	0	0	0	0	0	0	0	0	0	0	0	0	0	0	0	0	0	0	0	0	0	0	0	0	0	0	0
ASV1665	Bacteria	Actinobacteriota	Thermoleophilia	Solirubrobacterales	67-14	norank_f__67-14	NA	0.999495	0	28	0	0	0	0	0	0	0	0	0	0	0	0	0	0	0	0	0	0	0	0	0	0	0	0	0	0	58	0	0	0	0	0	0	0	37	0	0	0	0
ASV206	Bacteria	Actinobacteriota	Thermoleophilia	Solirubrobacterales	67-14	norank_f__67-14	uncultured_Rubrobacteraceae_bacterium_g__norank_f__67-14	0.977103	25	23	0	0	0	21	31	19	0	0	0	0	0	0	0	33	99	20	0	27	20	0	0	0	0	0	0	0	22	16	0	0	22	21	0	0	22	19	0	29	0
ASV7621	Bacteria	Actinobacteriota	Thermoleophilia	Solirubrobacterales	67-14	norank_f__67-14	uncultured_Rubrobacteraceae_bacterium_g__norank_f__67-14	0.960951	0	0	0	0	0	0	0	0	32	0	0	0	0	0	0	0	0	0	0	0	0	0	0	0	0	0	0	15	0	0	0	0	0	0	12	0	0	0	20	0	0
ASV3715	Bacteria	Actinobacteriota	Thermoleophilia	Solirubrobacterales	67-14	norank_f__67-14	NA	0.998826	0	0	11	11	17	0	0	0	0	7	17	12	0	23	6	0	0	0	12	0	0	17	18	0	0	0	0	0	0	0	0	5	0	0	0	0	0	0	0	0	16
ASV8090	Bacteria	Actinobacteriota	Thermoleophilia	norank_c__Thermoleophilia	norank_o__norank_c__Thermoleophilia	norank_f__norank_o__norank_c__Thermoleophilia	uncultured_bacterium_g__norank_f__norank_o__norank_c__Thermoleophilia	0.999945	0	0	0	0	0	0	0	0	0	31	0	35	0	0	0	0	0	0	0	0	0	24	38	0	0	0	27	0	0	0	16	23	0	0	0	0	0	0	0	0	26
ASV319	Bacteria	Actinobacteriota	Thermoleophilia	norank_c__Thermoleophilia	norank_o__norank_c__Thermoleophilia	norank_f__norank_o__norank_c__Thermoleophilia	uncultured_bacterium_g__norank_f__norank_o__norank_c__Thermoleophilia	0.999946	20	14	25	27	0	0	14	10	17	0	0	0	28	35	31	23	22	8	0	4	16	0	0	11	0	15	0	5	12	10	0	0	10	14	0	16	18	11	15	0	0
ASV3701	Bacteria	Actinobacteriota	Thermoleophilia	norank_c__Thermoleophilia	norank_o__norank_c__Thermoleophilia	norank_f__norank_o__norank_c__Thermoleophilia	uncultured_bacterium_g__norank_f__norank_o__norank_c__Thermoleophilia	0.999924	0	0	11	10	18	0	0	0	0	0	0	16	0	17	0	0	0	0	7	0	0	13	13	0	13	6	7	0	0	0	0	8	0	0	0	0	0	0	0	0	11
ASV3560	Bacteria	Actinobacteriota	Thermoleophilia	norank_c__Thermoleophilia	norank_o__norank_c__Thermoleophilia	norank_f__norank_o__norank_c__Thermoleophilia	uncultured_bacterium_g__norank_f__norank_o__norank_c__Thermoleophilia	0.99992	0	0	14	0	12	0	0	0	0	0	0	0	0	19	0	0	0	0	15	0	0	15	0	0	14	21	9	0	0	0	0	20	0	0	0	0	0	0	0	0	12
ASV2224	Bacteria	Actinobacteriota	Thermoleophilia	norank_c__Thermoleophilia	norank_o__norank_c__Thermoleophilia	norank_f__norank_o__norank_c__Thermoleophilia	uncultured_bacterium_g__norank_f__norank_o__norank_c__Thermoleophilia	0.99986	0	9	0	0	0	5	23	0	3	0	0	0	14	0	0	18	10	5	0	13	13	0	0	15	0	0	0	13	14	10	15	0	8	0	12	9	15	15	7	8	0
ASV2065	Bacteria	Actinobacteriota	Thermoleophilia	Solirubrobacterales	67-14	norank_f__67-14	NA	0.998876	0	12	0	0	0	0	0	0	0	0	0	0	33	0	0	0	0	0	0	0	0	0	0	0	0	0	0	0	0	0	0	0	0	0	0	19	0	0	0	0	0
ASV3381	Bacteria	Actinobacteriota	Thermoleophilia	Solirubrobacterales	67-14	norank_f__67-14	uncultured_actinobacterium_g__norank_f__67-14	0.796089	0	0	19	17	23	0	0	0	0	12	22	26	0	27	17	0	0	0	13	0	0	18	0	0	0	0	11	0	0	0	0	0	0	0	0	0	0	0	0	0	17
ASV798	Bacteria	Actinobacteriota	Thermoleophilia	Solirubrobacterales	67-14	norank_f__67-14	uncultured_actinobacterium_g__norank_f__67-14	0.847151	9	22	30	27	42	17	18	16	8	20	0	15	17	50	19	48	25	24	43	19	21	40	56	29	23	29	22	23	24	18	22	28	13	11	34	16	21	21	21	18	36
ASV6393	Bacteria	Actinobacteriota	Thermoleophilia	Solirubrobacterales	67-14	norank_f__67-14	uncultured_bacterium_g__norank_f__67-14	0.768867	0	0	0	0	0	19	0	0	0	0	0	0	0	0	0	0	0	0	0	0	0	0	0	0	0	0	0	0	21	0	0	0	0	0	0	0	0	0	0	27	0
ASV117	Bacteria	Actinobacteriota	Thermoleophilia	Solirubrobacterales	67-14	norank_f__67-14	uncultured_bacterium_g__norank_f__67-14	0.828715	31	23	20	36	31	0	0	0	0	16	35	22	32	28	26	33	37	15	21	0	28	31	31	0	14	15	26	35	0	0	42	21	0	0	0	22	30	38	0	0	26
ASV6499	Bacteria	Actinobacteriota	Thermoleophilia	Solirubrobacterales	67-14	norank_f__67-14	uncultured_bacterium_g__norank_f__67-14	0.743908	0	0	0	0	0	7	20	19	0	0	0	0	0	0	0	6	0	0	0	22	0	0	0	0	0	0	0	0	0	16	0	0	0	20	0	0	0	0	0	0	0
ASV3703	Bacteria	Actinobacteriota	Thermoleophilia	Solirubrobacterales	67-14	norank_f__67-14	NA	0.996431	0	0	11	8	17	0	0	0	0	0	0	12	0	15	0	0	0	0	18	0	0	13	20	0	0	14	0	0	0	0	0	12	0	0	0	0	0	0	0	0	11
ASV3609	Bacteria	Actinobacteriota	Thermoleophilia	Solirubrobacterales	67-14	norank_f__67-14	uncultured_bacterium_g__norank_f__67-14	0.844087	0	0	13	13	37	0	0	0	0	22	25	31	0	48	23	0	0	0	24	0	0	0	15	0	0	0	35	0	0	0	0	15	0	0	0	0	0	0	0	0	32
ASV4820	Bacteria	Actinobacteriota	Thermoleophilia	Solirubrobacterales	Solirubrobacteraceae	Solirubrobacter	uncultured_bacterium_g__Solirubrobacter	0.76722	0	0	0	14	16	0	0	0	0	20	0	15	0	17	0	0	0	0	0	0	0	24	0	0	20	0	12	0	0	0	0	20	0	0	0	0	0	0	0	0	20
ASV126	Bacteria	Actinobacteriota	Thermoleophilia	Solirubrobacterales	Solirubrobacteraceae	Solirubrobacter	uncultured_bacterium_g__Solirubrobacter	0.87976	30	16	0	0	22	0	23	22	14	13	0	38	28	35	18	46	28	0	19	14	42	29	0	22	0	0	33	34	0	23	33	0	19	0	0	18	32	0	29	29	25
ASV1888	Bacteria	Actinobacteriota	Thermoleophilia	Solirubrobacterales	Solirubrobacteraceae	Solirubrobacter	NA	0.997611	0	16	46	75	63	0	0	12	0	54	37	64	0	91	40	0	0	0	47	0	17	59	53	0	21	37	58	22	0	0	20	69	21	0	19	32	16	12	0	17	79
ASV9540	Bacteria	Actinobacteriota	Thermoleophilia	Solirubrobacterales	Solirubrobacteraceae	Solirubrobacter	NA	0.997808	0	0	0	0	0	0	0	0	0	0	0	0	0	14	0	0	0	0	0	0	0	0	0	0	0	0	0	0	0	0	0	0	0	0	0	15	0	0	0	0	0
ASV8083	Bacteria	Actinobacteriota	Thermoleophilia	Solirubrobacterales	Solirubrobacteraceae	Solirubrobacter	NA	0.998069	0	0	0	0	0	0	0	0	0	36	0	25	0	23	0	0	0	0	0	0	0	21	0	0	0	0	0	0	0	0	0	32	0	0	0	0	0	0	0	0	33
ASV9129	Bacteria	Actinobacteriota	Thermoleophilia	Solirubrobacterales	Solirubrobacteraceae	Solirubrobacter	uncultured_bacterium_g__Solirubrobacter	0.732164	0	0	0	0	0	0	0	0	0	0	0	0	20	0	0	0	0	0	14	0	0	0	0	0	0	0	34	0	0	0	0	0	0	0	0	0	0	0	0	0	0
ASV8081	Bacteria	Actinobacteriota	Thermoleophilia	Solirubrobacterales	Solirubrobacteraceae	Solirubrobacter	uncultured_bacterium_g__Solirubrobacter	0.891347	0	0	0	0	0	0	0	0	0	57	40	28	0	46	0	18	0	0	29	0	0	0	0	19	44	0	32	18	0	0	0	30	0	0	0	0	0	17	0	0	0
ASV3025	Bacteria	Actinobacteriota	Thermoleophilia	Solirubrobacterales	Solirubrobacteraceae	Solirubrobacter	uncultured_bacterium_g__Solirubrobacter	0.925669	0	0	52	37	64	0	0	0	0	0	0	33	0	0	38	0	0	0	0	0	0	38	0	0	0	43	0	0	0	0	0	0	0	0	0	0	0	0	0	0	34
ASV69	Bacteria	Actinobacteriota	Thermoleophilia	Solirubrobacterales	Solirubrobacteraceae	Solirubrobacter	uncultured_bacterium_g__Solirubrobacter	0.876092	40	24	32	40	49	36	21	24	19	41	0	30	14	41	0	19	31	18	23	28	0	34	52	0	0	0	37	21	17	35	35	40	0	0	42	0	28	0	0	31	40
ASV4662	Bacteria	Actinobacteriota	Thermoleophilia	Solirubrobacterales	Solirubrobacteraceae	Solirubrobacter	NA	0.998012	0	0	0	27	56	0	17	0	21	50	41	51	34	47	0	0	0	0	28	0	0	51	39	0	0	0	0	0	29	0	0	41	21	0	0	0	0	28	0	0	34
ASV3043	Bacteria	Actinobacteriota	Thermoleophilia	Solirubrobacterales	Solirubrobacteraceae	Solirubrobacter	NA	0.999654	0	0	45	19	45	0	0	0	0	14	37	22	0	26	37	0	0	0	0	0	0	31	36	0	25	37	36	0	0	0	0	28	0	0	0	0	0	0	0	0	31
ASV1931	Bacteria	Actinobacteriota	Thermoleophilia	Solirubrobacterales	Solirubrobacteraceae	Solirubrobacter	NA	0.999302	0	15	5	0	0	0	19	28	13	0	0	0	13	0	0	35	28	26	0	18	21	0	0	27	0	0	0	17	25	31	18	0	15	25	0	19	32	37	15	19	0
ASV4637	Bacteria	Actinobacteriota	Thermoleophilia	Solirubrobacterales	Solirubrobacteraceae	Solirubrobacter	NA	0.999761	0	0	0	34	41	0	0	0	0	30	0	22	0	39	30	0	0	0	32	0	0	28	30	0	19	30	49	0	0	0	0	0	0	0	0	0	0	0	0	0	31
ASV4726	Bacteria	Actinobacteriota	Thermoleophilia	Solirubrobacterales	Solirubrobacteraceae	Solirubrobacter	NA	0.99963	0	0	0	19	0	0	20	0	0	62	24	17	0	24	0	0	0	0	20	0	11	22	0	0	0	0	24	12	16	29	0	0	0	0	0	0	0	0	22	0	24
ASV168	Bacteria	Actinobacteriota	Thermoleophilia	Solirubrobacterales	Solirubrobacteraceae	Solirubrobacter	NA	0.999901	27	14	20	0	0	0	0	32	25	0	20	31	28	0	0	0	0	0	31	0	0	45	0	0	11	0	0	25	0	0	0	52	0	0	0	27	0	0	0	0	0
ASV4641	Bacteria	Actinobacteriota	Thermoleophilia	Solirubrobacterales	Solirubrobacteraceae	Solirubrobacter	NA	0.999699	0	0	0	32	45	0	0	0	0	0	0	0	0	0	0	0	0	0	0	0	0	0	34	0	22	0	58	0	0	0	0	0	0	0	0	0	0	0	0	0	0
ASV4004	Bacteria	Actinobacteriota	Thermoleophilia	Solirubrobacterales	Solirubrobacteraceae	Solirubrobacter	Solirubrobacter_taibaiensis	0.886494	0	0	7	0	14	0	0	0	0	0	0	21	0	26	0	0	0	0	0	0	0	0	0	0	12	0	22	0	0	0	0	0	0	0	0	0	0	0	0	0	14
ASV499	Bacteria	Actinobacteriota	Thermoleophilia	Solirubrobacterales	Solirubrobacteraceae	Solirubrobacter	NA	0.99991	15	0	0	0	0	0	0	14	0	0	0	0	0	0	0	0	0	0	17	0	0	0	37	0	0	19	0	19	0	0	0	0	0	0	0	0	0	0	18	0	0
ASV1788	Bacteria	Actinobacteriota	Thermoleophilia	Solirubrobacterales	Solirubrobacteraceae	Solirubrobacter	NA	0.999854	0	19	0	0	0	54	36	0	0	0	0	0	0	0	0	47	35	27	0	35	40	0	0	19	0	0	0	0	33	59	50	0	22	26	48	0	26	34	0	20	25
ASV4973	Bacteria	Actinobacteriota	Thermoleophilia	Gaiellales	Gaiellaceae	Gaiella	NA	0.935068	0	0	0	9	12	0	0	0	11	8	0	13	13	7	9	4	9	0	3	14	0	10	9	7	0	6	20	0	0	12	8	7	12	0	0	0	0	0	0	13	0
ASV3345	Bacteria	Actinobacteriota	Thermoleophilia	Gaiellales	Gaiellaceae	Gaiella	NA	0.98627	0	0	20	0	15	0	0	0	0	17	0	29	0	10	14	0	0	0	11	0	0	0	15	0	14	11	22	0	0	0	0	0	0	0	0	0	0	0	0	0	10
ASV4636	Bacteria	Actinobacteriota	Thermoleophilia	Gaiellales	Gaiellaceae	Gaiella	actinobacterium_WWH12	0.73266	0	0	0	34	54	0	0	0	0	28	0	54	0	0	24	0	0	0	17	0	0	49	26	0	0	43	34	0	0	0	0	19	0	0	0	0	0	0	0	0	45
ASV79	Bacteria	Actinobacteriota	Thermoleophilia	Gaiellales	Gaiellaceae	Gaiella	NA	0.949832	38	0	41	60	77	0	0	0	50	70	52	0	38	107	55	0	0	37	47	0	0	54	52	41	33	27	114	57	0	0	48	61	0	43	32	48	0	0	0	44	68
ASV1575	Bacteria	Actinobacteriota	Thermoleophilia	Gaiellales	Gaiellaceae	Gaiella	NA	0.957078	0	55	0	0	0	0	46	40	0	0	0	0	27	0	0	39	28	0	0	0	50	0	0	0	0	0	0	0	39	58	33	0	0	0	0	0	58	63	39	0	0
ASV6356	Bacteria	Actinobacteriota	Thermoleophilia	Gaiellales	Gaiellaceae	Gaiella	NA	0.949171	0	0	0	0	0	30	0	0	0	0	0	0	0	0	0	0	0	0	0	49	0	0	0	0	0	0	0	0	0	0	0	0	42	0	0	0	0	0	0	0	0
ASV3812	Bacteria	Actinobacteriota	Thermoleophilia	Gaiellales	Gaiellaceae	Gaiella	actinobacterium_WWH12	0.860867	0	0	10	0	21	0	0	0	0	0	0	20	0	0	25	0	0	0	19	0	0	12	0	0	0	0	23	0	0	0	0	0	0	0	0	0	0	0	0	0	18
ASV541	Bacteria	Actinobacteriota	Thermoleophilia	Gaiellales	Gaiellaceae	Gaiella	NA	0.874109	14	14	12	17	24	10	23	8	9	14	0	19	13	41	0	15	6	8	17	16	23	11	12	10	7	8	15	21	15	31	13	15	10	0	11	14	20	9	9	0	20
ASV4906	Bacteria	Actinobacteriota	Thermoleophilia	Gaiellales	Gaiellaceae	Gaiella	NA	0.948707	0	0	0	11	0	0	0	0	0	19	13	14	0	18	0	0	0	0	0	0	0	18	0	0	0	9	18	0	0	0	0	0	0	0	0	0	0	0	0	0	10
ASV6378	Bacteria	Actinobacteriota	Thermoleophilia	Gaiellales	Gaiellaceae	Gaiella	NA	0.816875	0	0	0	0	0	22	14	0	24	0	0	0	20	0	0	0	24	0	0	0	0	0	0	8	0	0	0	14	0	0	23	0	0	0	16	11	18	17	0	0	0
ASV3937	Bacteria	Actinobacteriota	Thermoleophilia	Gaiellales	Gaiellaceae	Gaiella	uncultured_bacterium_g__Gaiella	0.751424	0	0	8	8	23	0	0	0	0	12	0	8	0	13	6	0	0	0	13	0	0	12	17	0	7	11	14	0	0	0	0	9	0	0	0	0	0	0	0	0	16
ASV1607	Bacteria	Actinobacteriota	Thermoleophilia	Gaiellales	Gaiellaceae	Gaiella	NA	0.977574	0	38	0	0	0	15	26	0	28	0	0	0	16	0	0	36	24	0	0	0	25	0	0	0	0	0	0	11	17	12	43	0	10	16	0	0	18	18	16	30	0
ASV3026	Bacteria	Actinobacteriota	Thermoleophilia	Gaiellales	Gaiellaceae	Gaiella	NA	0.980845	0	0	52	50	65	0	0	0	0	50	45	43	32	58	48	0	0	0	48	0	0	43	46	23	22	41	55	32	0	0	0	28	0	0	27	37	0	0	0	0	35
ASV5549	Bacteria	Actinobacteriota	Thermoleophilia	Gaiellales	Gaiellaceae	Gaiella	NA	0.984359	0	0	0	0	38	0	0	0	0	0	0	55	0	26	0	0	0	0	0	0	0	38	0	0	0	0	43	0	0	0	0	40	0	0	0	0	0	0	0	0	34
ASV3538	Bacteria	Actinobacteriota	Thermoleophilia	Gaiellales	Gaiellaceae	Gaiella	NA	0.953838	0	0	15	20	24	0	0	0	0	0	14	29	0	20	0	0	0	0	9	0	0	17	11	0	5	0	0	0	0	0	0	18	0	0	0	0	0	0	0	0	26
ASV3629	Bacteria	Actinobacteriota	Thermoleophilia	Gaiellales	Gaiellaceae	Gaiella	NA	0.977662	0	0	13	0	24	0	0	0	0	30	0	38	0	18	31	0	0	0	15	0	0	32	21	0	15	23	33	0	0	0	0	16	0	0	0	0	0	0	0	0	0
ASV9494	Bacteria	Actinobacteriota	Thermoleophilia	Gaiellales	Gaiellaceae	Gaiella	NA	0.995765	0	0	0	0	0	0	0	0	0	0	0	0	0	18	0	0	0	0	0	0	12	0	0	0	0	0	0	0	10	0	8	0	0	10	0	0	8	10	9	0	17
ASV763	Bacteria	Actinobacteriota	Thermoleophilia	Gaiellales	Gaiellaceae	Gaiella	uncultured_actinobacterium_g__Gaiella	0.703268	10	0	27	35	44	0	11	0	0	22	19	61	0	37	21	10	8	0	24	0	0	52	29	10	8	16	22	0	0	0	0	35	11	0	0	0	0	0	0	0	47
ASV3975	Bacteria	Actinobacteriota	Thermoleophilia	Gaiellales	Gaiellaceae	Gaiella	NA	0.976127	0	0	8	11	33	0	6	0	0	22	16	40	0	29	0	0	0	0	0	0	0	32	11	0	0	0	25	0	0	0	0	12	0	0	0	0	0	0	0	0	18
ASV3167	Bacteria	Actinobacteriota	Thermoleophilia	Gaiellales	Gaiellaceae	Gaiella	NA	0.986201	0	0	29	26	34	0	0	0	0	33	0	0	0	34	29	0	0	0	43	0	0	0	34	0	0	27	42	0	0	0	0	0	0	0	0	0	0	0	0	0	33
ASV3731	Bacteria	Actinobacteriota	Thermoleophilia	Gaiellales	norank_o__Gaiellales	norank_f__norank_o__Gaiellales	NA	0.92322	0	0	11	18	30	0	0	0	0	23	0	23	0	20	16	0	0	0	21	0	0	26	0	0	0	21	36	0	0	0	0	0	0	0	0	0	0	0	0	0	25
ASV3275	Bacteria	Actinobacteriota	Thermoleophilia	Gaiellales	norank_o__Gaiellales	norank_f__norank_o__Gaiellales	NA	0.967787	0	0	22	12	8	0	38	9	0	9	0	21	19	14	0	0	0	8	25	0	13	22	29	17	16	14	0	0	9	17	13	8	0	0	9	3	30	10	12	0	10
ASV1922	Bacteria	Actinobacteriota	Thermoleophilia	Gaiellales	norank_o__Gaiellales	norank_f__norank_o__Gaiellales	uncultured_bacterium_g__norank_f__norank_o__Gaiellales	0.730808	0	15	0	0	0	0	0	0	17	0	0	0	0	0	0	16	0	0	0	0	0	0	0	0	0	0	0	0	0	0	0	0	0	0	0	0	0	0	0	6	0
ASV3087	Bacteria	Actinobacteriota	Thermoleophilia	Gaiellales	norank_o__Gaiellales	norank_f__norank_o__Gaiellales	NA	0.992276	0	0	36	12	32	0	0	0	0	15	0	43	0	45	16	0	0	0	29	0	0	31	36	2	22	24	36	0	0	0	6	18	0	0	0	0	0	0	0	0	33
ASV3388	Bacteria	Actinobacteriota	Thermoleophilia	Gaiellales	norank_o__Gaiellales	norank_f__norank_o__Gaiellales	NA	0.969162	0	0	18	19	23	0	0	0	0	18	0	24	0	16	0	0	0	0	22	0	0	16	24	0	0	15	13	0	0	0	0	12	0	0	0	0	0	0	0	0	18
ASV3292	Bacteria	Actinobacteriota	Thermoleophilia	Gaiellales	norank_o__Gaiellales	norank_f__norank_o__Gaiellales	NA	0.984237	0	0	22	21	49	0	0	0	0	33	0	43	0	37	0	0	0	0	0	0	0	21	45	0	36	0	35	0	0	0	0	57	0	0	0	0	0	0	0	0	47
ASV3005	Bacteria	Actinobacteriota	Thermoleophilia	Gaiellales	norank_o__Gaiellales	norank_f__norank_o__Gaiellales	NA	0.984495	0	0	74	43	88	0	0	0	0	37	28	65	0	80	50	0	0	0	81	0	0	53	68	0	34	24	62	0	0	0	0	37	0	0	0	0	0	0	0	0	76
ASV4150	Bacteria	Actinobacteriota	Thermoleophilia	Gaiellales	norank_o__Gaiellales	norank_f__norank_o__Gaiellales	NA	0.941081	0	0	6	7	20	0	0	0	0	4	0	4	0	20	0	0	0	0	0	0	0	12	14	0	7	0	10	0	0	0	0	13	0	0	0	0	0	0	0	0	31
ASV6819	Bacteria	Actinobacteriota	Thermoleophilia	Gaiellales	norank_o__Gaiellales	norank_f__norank_o__Gaiellales	NA	0.97129	0	0	0	0	0	0	11	17	8	0	0	0	8	0	0	18	9	0	0	9	0	0	0	0	0	0	0	0	19	0	16	0	0	0	0	8	7	6	0	10	0
ASV296	Bacteria	Actinobacteriota	Thermoleophilia	Gaiellales	norank_o__Gaiellales	norank_f__norank_o__Gaiellales	NA	0.984254	21	24	0	0	0	14	35	0	30	0	0	0	0	0	0	25	23	26	0	18	27	0	0	0	0	0	0	0	0	29	0	0	27	0	0	0	0	18	29	31	0
ASV9112	Bacteria	Actinobacteriota	Thermoleophilia	Gaiellales	norank_o__Gaiellales	norank_f__norank_o__Gaiellales	NA	0.98813	0	0	0	0	0	0	0	0	0	0	0	0	26	0	0	0	0	0	0	0	0	0	16	21	0	0	0	27	0	0	20	0	0	0	34	30	21	0	0	0	0
ASV3393	Bacteria	Actinobacteriota	Thermoleophilia	Gaiellales	norank_o__Gaiellales	norank_f__norank_o__Gaiellales	NA	0.982062	0	0	18	0	9	0	17	0	21	14	0	11	0	21	14	0	0	0	14	0	0	15	11	0	0	0	21	0	0	0	0	17	0	0	0	0	0	0	15	0	10
ASV9135	Bacteria	Actinobacteriota	Thermoleophilia	Gaiellales	norank_o__Gaiellales	norank_f__norank_o__Gaiellales	NA	0.974625	0	0	0	0	0	0	0	0	0	0	0	0	17	0	0	26	0	0	0	0	0	0	0	23	0	0	0	23	0	0	24	0	0	19	0	0	0	0	0	0	0
ASV3352	Bacteria	Actinobacteriota	Thermoleophilia	Gaiellales	norank_o__Gaiellales	norank_f__norank_o__Gaiellales	NA	0.97946	0	0	20	30	46	0	0	0	0	38	28	31	0	57	17	0	0	0	0	0	0	0	46	0	0	0	0	0	0	0	0	34	0	0	0	0	0	0	0	0	33
ASV11438	Bacteria	Actinobacteriota	Thermoleophilia	Gaiellales	norank_o__Gaiellales	norank_f__norank_o__Gaiellales	NA	0.982028	0	0	0	0	0	0	0	0	0	0	0	0	0	0	0	0	0	0	33	0	0	36	0	0	25	0	32	0	0	0	0	0	0	0	0	0	0	0	0	0	0
ASV3264	Bacteria	Actinobacteriota	Thermoleophilia	Gaiellales	norank_o__Gaiellales	norank_f__norank_o__Gaiellales	NA	0.98148	0	0	23	20	26	0	0	0	0	16	0	14	0	41	16	0	0	0	22	0	0	25	33	0	0	8	19	0	0	0	0	0	0	0	0	0	0	0	0	0	17
ASV3462	Bacteria	Actinobacteriota	Thermoleophilia	Gaiellales	norank_o__Gaiellales	norank_f__norank_o__Gaiellales	uncultured_Rubrobacteria_bacterium_g__norank	0.815294	0	0	16	0	24	0	0	0	0	12	16	15	0	22	7	0	0	0	23	0	0	8	0	0	7	0	18	0	0	0	0	8	0	0	0	0	0	0	0	0	19
ASV2107	Bacteria	Actinobacteriota	Thermoleophilia	Gaiellales	norank_o__Gaiellales	norank_f__norank_o__Gaiellales	NA	0.729534	0	11	0	0	0	7	19	0	16	0	0	0	21	0	0	16	0	0	0	7	10	0	0	0	0	0	0	0	13	0	0	0	0	0	0	0	21	14	0	12	0
ASV3308	Bacteria	Actinobacteriota	Thermoleophilia	Gaiellales	norank_o__Gaiellales	norank_f__norank_o__Gaiellales	uncultured_bacterium_g__norank_f__norank_o__Gaiellales	0.727965	0	0	21	12	24	0	0	0	0	10	7	6	0	25	10	0	0	0	6	0	0	12	22	0	0	11	15	0	0	0	0	12	0	0	0	0	0	0	0	0	22
[truncated: 917 more rows]
[truncated: 1,297 more columns]

## Sheet: Suppl Dataset 4
Supplemental Dataset 4. List of 203 highly heritable (H2 >0.15) ASVs detected at both field locations. The dominat families (n ≥5) are highlighted in yellow.
ASV	Phylum	Class	Order	Family	Genus	Species	H2>0.15
[truncated: 203 more rows]

## Sheet: Suppl Dataset 5
Supplemental Dataset 5. Correlation between gene coexpressed modules and microbial traits e.g. ASVs, families and genera.
[truncated: 1,720 more rows]

[truncated: 5 more sheets: Suppl Dataset 6, Suppl Dataset 7, Suppl Dataset 8, Supplemental Dataset 9, Suppl Dataset 10]
